# Supplementary material for: Photocatalytic redox-neutral selective single C(sp3)–F bond activation of perfluoroalkyl iminosulfides with alkenes and water
Source: Royal Society of Chemistry journal article supplement (doi:10.1039/d3sc03771a), 2023-01-01

# Supporting Information

## Photocatalytic Redox-Neutral Selective Single C(sp<sup>3</sup>)-F Bond Activation of Perfluoroalkyl Imines under Redox- Neutral Conditions

Tao Wang,<sup>†</sup> Yuan-Yuan Zong,<sup>†</sup> Tao Huang,<sup>†</sup> Xiao-Ling Jin,<sup>†</sup> Li-Zhu Wu,<sup>‡</sup> and Qiang Liu<sup>\*†</sup>

<sup>a</sup>State Key Laboratory of Applied Organic Chemistry, College of Chemistry and Chemical Engineering, Lanzhou University, Lanzhou 730000, P. R. China

<sup>b</sup>Key Laboratory of Photochemical Conversion and Optoelectronic Materials, Technical Institute of Physics and Chemistry, the Chinese Academy of Sciences, Beijing 100190, P. R. China

\*E-mail: [liuqiang@lzu.edu.cn](mailto:liuqiang@lzu.edu.cn)

|                                                                                |             |
|--------------------------------------------------------------------------------|-------------|
| <b>I. General Information</b> .....                                            | <b>S2</b>   |
| <b>II. Detailed Reaction Optimizations</b> .....                               | <b>S3</b>   |
| <b>III. Gram-Scale Synthesis of 3a</b> .....                                   | <b>S6</b>   |
| <b>IV. General Synthetic Procedures</b> .....                                  | <b>S6</b>   |
| <b>1. General Procedure for Single C(sp<sup>3</sup>)-F Bond Cleavage</b> ..... | <b>S6</b>   |
| <b>2. Synthesis of Alkenylpyridines</b> .....                                  | <b>S6</b>   |
| <b>3. Synthesis of Perfluoroalkyl Group Substituted Iminosulfides</b> .....    | <b>S8</b>   |
| <b>4. Derivatization of Products</b> .....                                     | <b>S18</b>  |
| <b>V. Mechanistic Studies</b> .....                                            | <b>S19</b>  |
| <b>1. The Radical Trapping Experiments</b> .....                               | <b>S19</b>  |
| <b>2. For the Labeling experiments:</b> .....                                  | <b>S20</b>  |
| <b>3. General procedure of the ESR experiments</b> .....                       | <b>S20</b>  |
| <b>4. The Cyclic Voltammetry Experiments</b> .....                             | <b>S22</b>  |
| <b>5. Quenching studies of Ir(ppy)<sub>3</sub> with 1a and 2a</b> .....        | <b>S23</b>  |
| <b>6. Theoretical Calculations</b> .....                                       | <b>S25</b>  |
| <b>VI. X-Ray Crystal Structure Determinations</b> .....                        | <b>S51</b>  |
| <b>VII. Characterization Data of the Products</b> .....                        | <b>S52</b>  |
| <b>VIII. References</b> .....                                                  | <b>S74</b>  |
| <b>NMR Spectra of the Substrates</b> .....                                     | <b>S75</b>  |
| <b>NMR Spectra of the Products</b> .....                                       | <b>S126</b> |

## I. General Information

Unless otherwise stated, all reactions were set up in a clear Pyrex glass tube and were stirred with a Teflon-coated magnetic stir bar. Analytical grade solvents and commercially available reagents were used to conduct the reactions. All other reagents were purchased from TCI, Innochem, J&K, Adamas, and Energy chemicals, and were directly used without further purifications. TLC was performed on silica HSGF254 plates and visualized by quenching of UV fluorescence ( $\lambda_{\text{max}} = 254 \text{ nm}$ ). Silica gel (200–300 mesh) was purchased from Qingdao Haiyang Chemical Co., China. All reaction glassware was flame- or oven-dried before use. Reactions were monitored by thin-layer chromatography (TLC), and the products were obtained by column chromatography on silica gel.

$^1\text{H}$  NMR,  $^{13}\text{C}$  NMR and  $^{19}\text{F}$  NMR were recorded on a Bruker AM-400 MHz spectrometer (400MHz, 101MHz and 376MHz).  $^1\text{H}$  NMR spectra were reported in parts per million (ppm) downfield of tetramethylsilane (TMS) and internally referenced to TMS (0.00 ppm) or the residual protic-solvent peak in  $\text{CDCl}_3$  (7.26 ppm).  $^{13}\text{C}$  NMR spectra were reported in ppm relative to residual  $\text{CHCl}_3$  (77.0 ppm). In reporting spectral data the format ( $\delta$ ) chemical shift (multiplicity,  $J$  values in Hz, integration) was used with the following abbreviations: s = singlet, d = doublet, t = triplet, q = quartet, dd = doublet of doublets, m = multiplet. High-resolution mass spectra (HRMS) were measured on a TOF by ESI and performed on Bruker Daltonics APEXII 47e Specifications. The X-ray single-crystal determination was performed on a Bruker APEX II X-ray single crystal diffractometer. The melting point was measured by WRX® X-4B.

## II. Detailed Reaction Optimizations

**Table S1. Screening of substrates<sup>[a]</sup>**

| Substrate                                                                                         | Yield (%) <sup>[b]</sup> | dr <sup>[c]</sup> |
|---------------------------------------------------------------------------------------------------|--------------------------|-------------------|
| 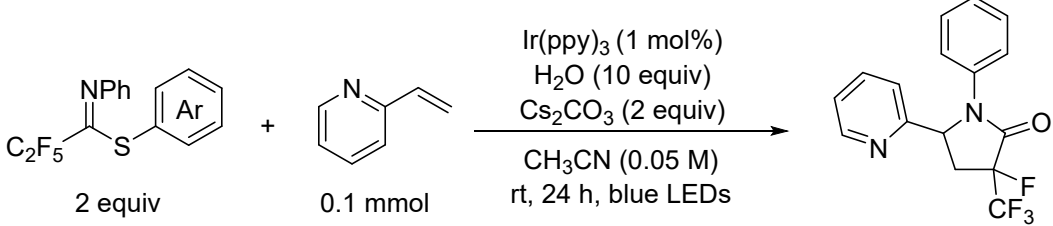                |                          |                   |
| <br><b>1a</b>    | 83                       | 12:1              |
| <br><b>1v</b>    | 72                       | 11:1              |
| <br><b>1w</b>  | 71                       | 12:1              |
| <br><b>1x</b>  | 68                       | 10:1              |
| <br><b>1y</b>  | 62                       | 11:1              |
| <br><b>1z</b>  | 62                       | 12:1              |
| <br><b>1aa</b> | N.D.                     |                   |

[a] Reaction conditions: **1** (0.2 mmol), **2a** (0.1 mmol), Cs<sub>2</sub>CO<sub>3</sub> (0.2 mmol), H<sub>2</sub>O (1 mmol), Ir(ppy)<sub>3</sub> (0.001 mmol) in 2.0 mL of dry CH<sub>3</sub>CN with 6 W blue LED irradiation at rt for 24 h, unless otherwise noted. [b] Isolated yield; N.D. = not detected. [c] Detected by <sup>19</sup>F NMR.

**Table S2. Screening of catalyst screening and control experiments<sup>[a]</sup>**
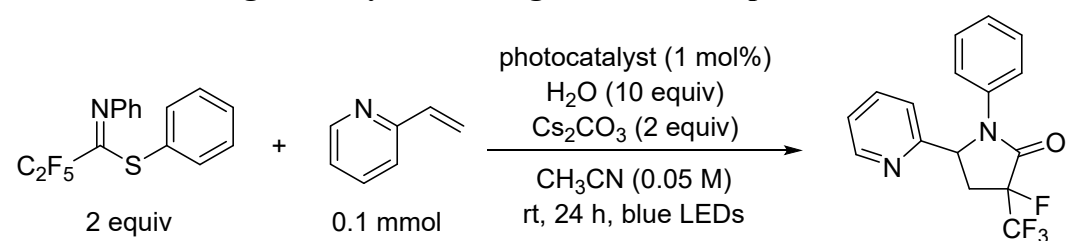

| Entry | PC                                                                 | Yield (%) <sup>[b]</sup> | dr <sup>[c]</sup> |
|-------|--------------------------------------------------------------------|--------------------------|-------------------|
| 1     | Ir(ppy) <sub>3</sub>                                               | 83                       | 12:1              |
| 2     | [Ir(dtbbpy)(ppy) <sub>2</sub> ] <sub>2</sub> PF <sub>6</sub>       | N.D.                     |                   |
| 3     | [Ir{dF(CF <sub>3</sub> )ppy} <sub>2</sub> (dtbbpy)]PF <sub>6</sub> | N.D.                     |                   |
| 4     | [Ru(bpy) <sub>3</sub> ]Cl <sub>2</sub>                             | N.D.                     |                   |
| 5     | Ir(dFppy) <sub>3</sub>                                             | 68                       | 16:1              |
| 6     | Ir(t-Buppy) <sub>3</sub>                                           | 65                       | 8:1               |
| 7     | Mes-Acr <sup>+</sup> ClO <sub>4</sub> <sup>-</sup>                 | N.D.                     |                   |
| 8     | 4-CzIPN                                                            | N.D.                     |                   |
| 9     | Eosin-Y                                                            | N.D.                     |                   |
| 10    | no catalyst                                                        | N.D.                     |                   |
| 11    | no light                                                           | N.D.                     |                   |

[a] Reaction conditions: **1a** (0.2 mmol), **2a** (0.1 mmol), Cs<sub>2</sub>CO<sub>3</sub> (0.2 mmol), H<sub>2</sub>O (1 mmol) and photocatalyst (0.001 mmol) in 2.0 mL of dry CH<sub>3</sub>CN with 6 W blue LED irradiation at rt for 24 h, unless otherwise noted. [b] Isolated yield; N.D. = not detected. [c] Detected by <sup>19</sup>F NMR.

**Table S3. Screening of solvents<sup>[a]</sup>**
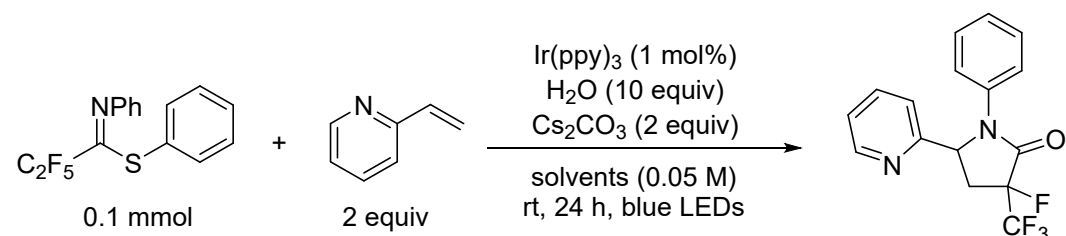

| Entry | solvents           | Yield (%) <sup>[b]</sup> | dr <sup>[c]</sup> |
|-------|--------------------|--------------------------|-------------------|
| 1     | CH <sub>3</sub> CN | 72                       | 12:1              |
| 2     | AcOEt              | N.D.                     |                   |
| 3     | DMF                | 67                       | 11:1              |
| 4     | DMSO               | 45                       | 5:1               |
| 5     | TFE                | N.D.                     |                   |
| 6     | DCM                | 60                       | 17:1              |
| 7     | Acetone            | 69                       | 10:1              |
| 8     | Dioxane            | N.D.                     |                   |
| 9     | Toluene            | N.D.                     |                   |
| 10    | THF                | N.D.                     |                   |

[a] Reaction conditions: **1a** (0.2 mmol), **2a** (0.1 mmol), Cs<sub>2</sub>CO<sub>3</sub> (0.2 mmol), H<sub>2</sub>O (1 mmol), Ir(ppy)<sub>3</sub> (0.001 mmol) in 2.0 mL of dry solvent with 6 W blue LED irradiation at rt for 24 h, unless otherwise noted. [b] Isolated yield; N.D. = not detected. [c] Detected by <sup>19</sup>F NMR.



**Table S4. Screening of bases<sup>[a]</sup>**

| Entry | bases                            | Yield (%) <sup>[b]</sup> | dr <sup>[c]</sup> |
|-------|----------------------------------|--------------------------|-------------------|
| 1     | Cs <sub>2</sub> CO <sub>3</sub>  | 75                       | 12:1              |
| 2     | K <sub>2</sub> HPO <sub>4</sub>  | 65                       | 11:1              |
| 3     | Na <sub>2</sub> CO <sub>3</sub>  | 67                       | 13:1              |
| 4     | K <sub>2</sub> CO <sub>3</sub>   | 67                       | 9:1               |
| 5     | NaHCO <sub>3</sub>               | 54                       | 10:1              |
| 6     | Li <sub>2</sub> CO <sub>3</sub>  | 60                       | 11:1              |
| 7     | Na <sub>2</sub> HPO <sub>4</sub> | 63                       | 10:1              |
| 8     | NaOH                             | 66                       | 12:1              |
| 9     | KOH                              | 60                       | 11:1              |

[a] Reaction conditions: **1a** (0.2 mmol), **2a** (0.1 mmol), bases (0.2 mmol), H<sub>2</sub>O (1 mmol), Ir(ppy)<sub>3</sub> (0.001 mmol) in 2.0 mL of dry CH<sub>3</sub>CN with 6 W blue LED irradiation at rt for 24 h, unless otherwise noted. [b] Isolated yield; N.D. = not detected. [c] Detected by <sup>19</sup>F NMR.

**Table S5. Screening of water<sup>[a]</sup>**

| Entry | H <sub>2</sub> O (equiv) | Yield (%) <sup>[b]</sup> | dr <sup>[c]</sup> |
|-------|--------------------------|--------------------------|-------------------|
| 1     | 5                        | 78                       | 9:1               |
| 2     | 10                       | 82                       | 12:1              |
| 3     | 25                       | 69                       | 10:1              |
| 4     | 50                       | 55                       | 9:1               |
| 5     | 100                      | 25                       | 11:1              |

[a] Reaction conditions: **1a** (0.2 mmol), **2a** (0.1 mmol), Cs<sub>2</sub>CO<sub>3</sub> (0.2 mmol), H<sub>2</sub>O (x equiv), Ir(ppy)<sub>3</sub> (0.001 mmol) in 2.0 mL of dry CH<sub>3</sub>CN with 6 W blue LED irradiation at rt for 24 h, unless otherwise noted. [b] Isolated yield; N.D. = not detected. [c] Detected by <sup>19</sup>F NMR.

### III. Gram-Scale Synthesis of 3a

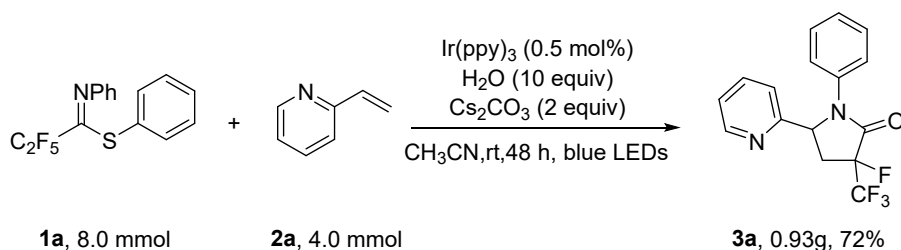

To a 100 mL round-bottom flask equipped with a magnetic stir-bar were added phenyl 2,2,3,3,3-pentafluoro-N-phenylpropanimidothioate **1a** (8.0 mmol, 2.0 equiv), 2-vinylpyridine **2a** (4.0 mmol, 1.0 equiv), cesium carbonate (8.0 mmol, 2.0 equiv), and Ir(ppy)<sub>3</sub> (0.02 mmol, 0.5 mol%). Then, acetonitrile (40.0 mL) and water (0.72 mL, 10 equiv) were added. The vessel was bubbled with a stream of argon for 20 min via a syringe needle, and the tightly sealed tube was irradiated with a 36 W blue LED at about 20 °C for 48 h. The solvent was removed under reduced pressure by a rotary evaporator. Then, the residue was purified by silica gel column chromatography to give the desired product **3a** with a 72% yield.

### IV. General Synthetic Procedures

#### 1. General Procedure for Single C(sp<sup>3</sup>)-F Bond Cleavage

Polyfluorinated Iminosulfide **1** (0.2 mmol, 2.0 equiv), cesium carbonate (0.2 mmol, 2.0 equiv) and Ir(ppy)<sub>3</sub> (0.002 mmol, 1.4 mg, 2.0 mol%) were added into a 10 mL of Schlenk tube equipped with a rubber septum and magnetic stirring bar. Then anhydrous MeCN (2 mL, 0.05 M), distilled water (18 μL, 10 equiv) and the alkene (0.1 mmol, 1 equiv) were added sequentially by syringes. The vessel was bubbled with a stream of argon for 20 min via a syringe needle, and the tightly sealed tube was irradiated with 6 W blue LEDs at about 20 °C. After 24 h, the solvent was removed, and the crude products were purified by column chromatography over silica gel as indicated.

#### 2. Synthesis of Alkenylpyridines

##### Procedure A:

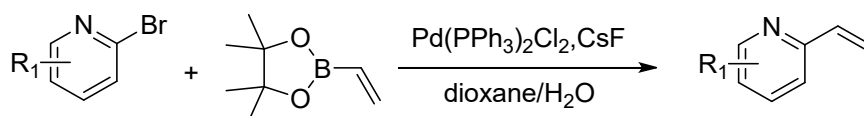

Following the modified procedure of reported literature,<sup>1</sup> to a solution of bromo-substituted azaarene (10.0 mmol, 1.0 equiv.), CsF (4.6 g, 30.0 mmol) and pinacol vinylboronate (2.3 g, 15.0

mmol) in dioxane/H<sub>2</sub>O (20 mL/10 mL) was added Pd(PPh<sub>3</sub>)<sub>2</sub>Cl<sub>2</sub> (0.7 g, 1.0 mmol). After stirring for 16 h at 80 °C under Ar, the mixture was concentrated in vacuo. The crude product was further purified by column chromatography (petroleum ether/ethyl acetate = 40/1 - 10/1) on silica gel to yield the corresponding alkenylpyridines.

### Procedure B:

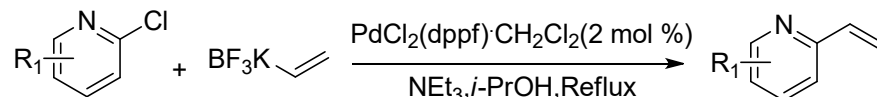

Following the modified procedure of reported literature,<sup>2</sup> a solution of chloro-substituted azaarene (8.0 mmol, 1.0 equiv.), potassium vinyltrifluoroborate (1.29 g, 9.6 mmol), PdCl<sub>2</sub>(dppf)·CH<sub>2</sub>Cl<sub>2</sub> (131 mg, 0.16 mmol), and Et<sub>3</sub>N (1.12 mL, 8.0 mmol) in iPrOH (125 mL) was heated to reflux for 16 h. The mixture was cooled to room temperature and partitioned between CH<sub>2</sub>Cl<sub>2</sub> (100 mL) and H<sub>2</sub>O (40 mL). The aqueous layer was separated and extracted with CH<sub>2</sub>Cl<sub>2</sub> (2 x 50 mL) and the combined organic layers were washed with brine (100 mL), dried (MgSO<sub>4</sub>), filtered, and concentrated in vacuo. Purification of the residue by column chromatography (petroleum ether/ethyl acetate = 40/1 - 10/1) gave the vinylpyridines.

### Procedure C:

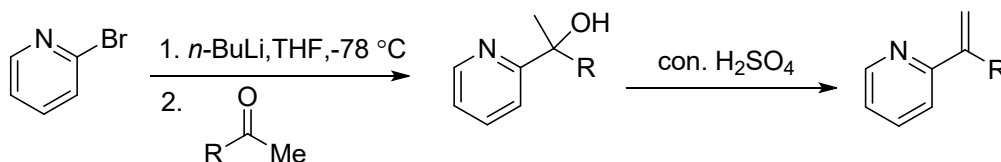

Following the modified procedure of reported literature,<sup>3</sup> a solution of 2-bromopyridine (2.37 g, 1.43 mL, 15.0 mmol, 1.0 equiv.) in THF (19 mL, 0.8 M) was cooled to -78 °C. n-Butyllithium (15.8 mmol, 1.1 equiv.) was then slowly added and the reaction mixture was stirred at -78 °C for 10 min. After that time, the corresponding ketone (15.0 mmol, 1.0 equiv.) was added to the above solution and the reaction mixture was stirred for 15 h while slowly warming up to 23 °C. NH<sub>4</sub>Cl (aq) (20 mL) and EtOAc (20 mL) was added, the layers were separated and the aqueous layer was extracted with EtOAc (3 x 20 mL). The organic extracts were combined, dried (MgSO<sub>4</sub>), filtered, and concentrated in vacuo. The residue was purified by chromatography on silica gel, eluting with hexanes/ EtOAc (9:1 to 4:2 (v/v)), to afford the title compound pyridine alcohol. Concentrated H<sub>2</sub>SO<sub>4</sub> (5 mL) was added to the above alcohol and stirred at 100 °C for 1 h. Crashed ice was added and neutralized with NaOH solution to PH = 7 - 8. The reaction mixture was extracted with ethyl ether (20 mL x 3) then washed with brine and dried over anhydrous sodium sulfate. The solvent was removed by rotary evaporation and purified by silica gel column chromatography to afford the pure products.

### 3. Synthesis of Perfluoroalkyl Group Substituted Iminosulfides

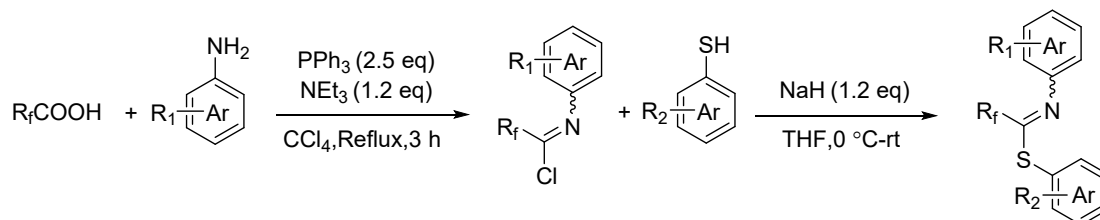

A 200 mL two-necked flask equipped with a septum cap, a condenser, and a Teflon-coated magnetic stir bar was charged with  $\text{PPh}_3$  (34.5 g, 132 mmol),  $\text{Et}_3\text{N}$  (7.3 mL, 53 mmol),  $\text{CCl}_4$  (21.1 mL, 220 mmol), and TFA (3.4 mL, 44 mmol). After the solution was stirred for about 10 min (ice bath), an amine (53 mmol) dissolved in  $\text{CCl}_4$  (21.1 mL, 220 mmol) was added. The mixture was then refluxed with stirring (3 h). After the reaction was completed, residual solid  $\text{Ph}_3\text{PO}$ ,  $\text{PPh}_3$ , and  $\text{Et}_3\text{N}\cdot\text{HCl}$  were washed with hexane several times. Then the hexane was filtered and concentrated under vacuum. The crude product was purified by column chromatography on silica gel or neutral alumina to afford the corresponding fluorinated imidoyl chlorides.

To a solution of thiophenol (2.37 g, 1.43 mL, 15.0 mmol, 1.0 equiv.) in THF (19 mL, 0.8 M) was cooled to 0 °C. Sodium hydride (15.8 mmol, 1.1 equiv.) was then slowly added and the reaction mixture was stirred at 0 °C for 10 min. After that time, the corresponding fluorinated imidoyl chlorides (15.0 mmol, 1.0 equiv.) was added to the above solution, and the reaction mixture was stirred for 3 h at room temperature, diluted with diethyl ether (60 mL), and washed with aqueous  $\text{NaHCO}_3$  ( $2 \times 30$  mL) and brine (30 mL). The organic layer was dried over anhydrous  $\text{MgSO}_4$ , filtered, and concentrated under reduced pressure. The crude product was purified by column chromatography on silica gel to afford the corresponding product.

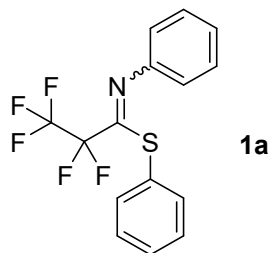

Chemical Formula:  $\text{C}_{15}\text{H}_{10}\text{F}_5\text{NS}$

#### phenyl 2,2,3,3,3-pentafluoro-*N*-phenylpropanimidothioate (**1a**)

$^1\text{H NMR}$  (400 MHz, Chloroform-*d*)  $\delta$  (ppm) = 7.30 – 7.25 (m, 2H), 7.24 – 7.12 (m, 5H), 7.07 – 7.00 (m, 1H), 6.81 – 6.74 (m, 2H).

$^{13}\text{C NMR}$  (101 MHz, Chloroform-*d*)  $\delta$  (ppm) = 151.7 (t,  $J = 29.6$  Hz), 146.3, 134.7, 129.3, 129.0, 128.7, 126.9, 125.5, 119.0, 118.4 (qt,  $J = 287.2, 35.7$  Hz), 110.2 (tq,  $J = 259.6, 36.3$  Hz).

$^{19}\text{F NMR}$  (376 MHz, Chloroform-*d*)  $\delta$  (ppm) = -80.70 (s, 3F), -111.18 (s, 2F).

**HRMS (ESI) m/z:**  $[\text{M} + \text{H}]^+$  Calcd for  $\text{C}_{15}\text{H}_{11}\text{F}_5\text{NS}$  332.0527; Found 332.0526.

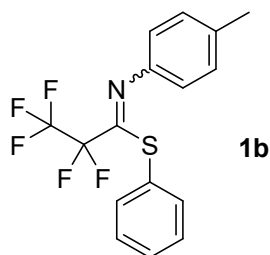

Chemical Formula: C<sub>16</sub>H<sub>12</sub>F<sub>5</sub>NS

**phenyl 2,2,3,3,3-pentafluoro-N-(p-tolyl)propanimidothioate (1b)**

<sup>1</sup>H NMR (400 MHz, Chloroform-*d*) δ (ppm) = 7.31 – 7.27 (m, 2H), 7.26 – 7.21 (m, 1H), 7.20 – 7.14 (m, 2H), 7.02 (d, *J* = 8.2 Hz, 2H), 6.74 (d, *J* = 8.3 Hz, 2H), 2.28 (s, 3H).

<sup>13</sup>C NMR (101 MHz, Chloroform-*d*) δ (ppm) = 150.9 (t, *J* = 29.6 Hz), 143.8, 135.5, 134.6, 129.2, 129.1, 128.9, 127.2, 119.4, 118.4 (qt, *J* = 287.4, 35.8 Hz), 110.3 (tq, *J* = 259.7, 36.3 Hz), 20.9.

<sup>19</sup>F NMR (376 MHz, Chloroform-*d*) δ (ppm) = -80.67 (s, 3F), -110.62 (s, 2F).

HRMS (ESI) *m/z*: [M + H]<sup>+</sup> Calcd for C<sub>16</sub>H<sub>13</sub>F<sub>5</sub>NS 346.0683; Found 346.0682.

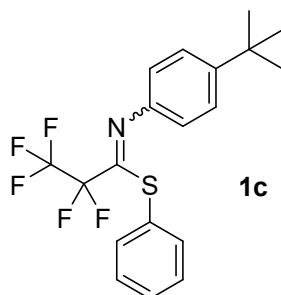

Chemical Formula: C<sub>19</sub>H<sub>18</sub>F<sub>5</sub>NS

**phenyl N-(4-(tert-butyl)phenyl)-2,2,3,3,3-pentafluoropropanimidothioate (1c)**

<sup>1</sup>H NMR (400 MHz, Chloroform-*d*) δ (ppm) = 7.26 – 7.21 (m, 2H), 7.21 – 7.16 (m, 3H), 7.15 – 7.09 (m, 2H), 6.76 – 6.70 (m, 2H), 1.27 (s, 9H).

<sup>13</sup>C NMR (101 MHz, Chloroform-*d*) δ (ppm) = 150.5 (t, *J* = 29.8 Hz), 148.7, 143.5, 134.5, 129.1, 128.9, 127.2, 125.4, 119.1, 118.5 (qt, *J* = 287.3, 36.3 Hz), 110.2 (tq, *J* = 259.6, 36.4 Hz), 34.4, 31.3.

<sup>19</sup>F NMR (376 MHz, Chloroform-*d*) δ (ppm) = -80.70 (s, 3F), -111.29 (s, 2F).

HRMS (ESI) *m/z*: [M + H]<sup>+</sup> Calcd for C<sub>19</sub>H<sub>19</sub>F<sub>5</sub>NS 388.1153; Found 388.1151.

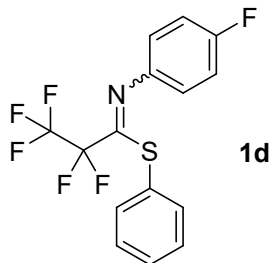

Chemical Formula: C<sub>15</sub>H<sub>9</sub>F<sub>6</sub>NS

**phenyl 2,2,3,3,3-pentafluoro-N-(4-fluorophenyl)propanimidothioate (1d)**

<sup>1</sup>H NMR (400 MHz, Chloroform-*d*) δ (ppm) = 7.26 – 7.21 (m, 3H), 7.19 – 7.11 (m, 2H), 6.89 – 6.82 (m, 2H), 6.80 – 6.72 (m, 2H).

$^{13}\text{C}$  NMR (101 MHz, Chloroform-*d*)  $\delta$  (ppm) = 160.5 (d,  $J$  = 245.4 Hz), 152.0 (t,  $J$  = 29.5 Hz), 142.2 (d,  $J$  = 3.1 Hz), 134.4, 129.4, 129.1, 126.8, 121.0 (d,  $J$  = 8.3 Hz), 118.4 (qt,  $J$  = 287.3, 35.7 Hz), 115.5 (d,  $J$  = 22.8 Hz), 110.4 (tq,  $J$  = 259.6, 36.7 Hz).

$^{19}\text{F}$  NMR (376 MHz, Chloroform-*d*)  $\delta$  (ppm) = -80.74 (s, 3F), -111.57 (s, 2F), -117.11 (s, 1F).

HRMS (ESI)  $m/z$ :  $[M + H]^+$  Calcd for  $\text{C}_{15}\text{H}_{10}\text{F}_6\text{NS}$  350.0433; Found 350.0432.

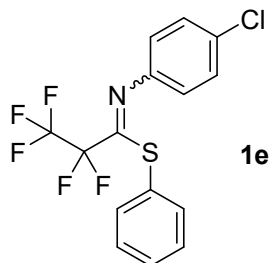

Chemical Formula:  $\text{C}_{15}\text{H}_9\text{ClF}_5\text{NS}$

**phenyl *N*-(4-chlorophenyl)-2,2,3,3,3-pentafluoropropanimidothioate (1e)**

$^1\text{H}$  NMR (400 MHz, Chloroform-*d*)  $\delta$  (ppm) = 7.26 – 7.21 (m, 3H), 7.19 – 7.09 (m, 4H), 6.70 – 6.66 (m, 2H).

$^{13}\text{C}$  NMR (101 MHz, Chloroform-*d*)  $\delta$  (ppm) = 152.8 (t,  $J$  = 29.2 Hz), 144.7, 134.7, 130.9, 129.5, 129.1, 128.7, 127.5, 120.4, 118.4 (qt,  $J$  = 287.4, 35.8 Hz), 110.0 (tq,  $J$  = 259.9, 36.7 Hz).

$^{19}\text{F}$  NMR (376 MHz, Chloroform-*d*)  $\delta$  (ppm) = -80.75 (s, 3F), -111.73 (s, 2F).

HRMS (ESI)  $m/z$ :  $[M + H]^+$  Calcd for  $\text{C}_{15}\text{H}_{10}\text{ClF}_5\text{NS}$  366.0137; Found 366.0136.

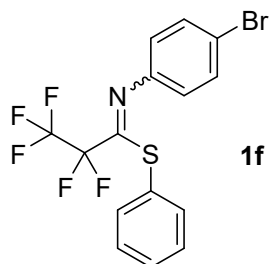

Chemical Formula:  $\text{C}_{15}\text{H}_9\text{BrF}_5\text{NS}$

**phenyl *N*-(4-bromophenyl)-2,2,3,3,3-pentafluoropropanimidothioate (1f)**

$^1\text{H}$  NMR (400 MHz, Chloroform-*d*)  $\delta$  (ppm) = 7.28 – 7.20 (m, 5H), 7.19 – 7.13 (m, 2H), 6.64 – 6.59 (m, 2H).

$^{13}\text{C}$  NMR (101 MHz, Chloroform-*d*)  $\delta$  (ppm) = 152.9 (t,  $J$  = 29.3 Hz), 145.2, 134.8, 131.7, 129.5, 129.1, 127.5, 120.7, 118.6, 118.3 (qt,  $J$  = 287.4, 35.7 Hz), 110.0 (tq,  $J$  = 260.0, 36.8 Hz).

$^{19}\text{F}$  NMR (376 MHz, Chloroform-*d*)  $\delta$  (ppm) = -80.7 (s, 3F), -111.8 (s, 2F).

HRMS (ESI)  $m/z$ :  $[M + H]^+$  Calcd for  $\text{C}_{15}\text{H}_{10}\text{BrF}_5\text{NS}$  409.9632; Found 409.9631.

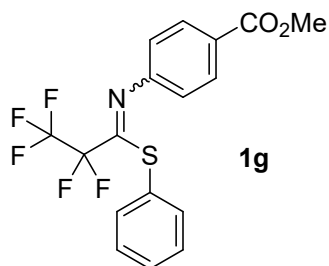

Chemical Formula:  $\text{C}_{17}\text{H}_{12}\text{F}_5\text{NO}_2\text{S}$

**methyl 4-((2,2,3,3,3-pentafluoro-1-(phenylthio)propylidene)amino)benzoate (1g)**

**<sup>1</sup>H NMR** (400 MHz, Chloroform-*d*)  $\delta$  (ppm) = 7.86 – 7.79 (m, 2H), 7.25 – 7.20 (m, 3H), 7.16 – 7.08 (m, 2H), 6.78 – 6.71 (m, 2H), 3.89 (s, 3H).

**<sup>13</sup>C NMR** (101 MHz, Chloroform-*d*)  $\delta$  (ppm) = 166.4, 153.4 (t,  $J$  = 29.3 Hz), 150.2, 135.0, 130.3, 129.7, 129.1, 126.6, 126.2, 118.4, 118.3 (qt,  $J$  = 287.6, 35.7 Hz), 109.9 (tq,  $J$  = 261.1, 37.0 Hz), 52.04.

**<sup>19</sup>F NMR** (376 MHz, Chloroform-*d*)  $\delta$  (ppm) = -80.83 (s, 3F), -112.09 (s, 2F).

**HRMS (ESI) m/z:** [M + H]<sup>+</sup> Calcd for C<sub>17</sub>H<sub>13</sub>F<sub>5</sub>NO<sub>2</sub>S 390.0582; Found 390.0581.

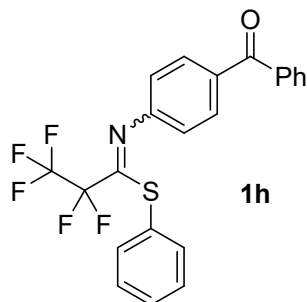

Chemical Formula: C<sub>22</sub>H<sub>14</sub>F<sub>5</sub>NOS

**phenyl *N*-(4-benzoylphenyl)-2,2,3,3,3-pentafluoropropanimidothioate (1h)**

**<sup>1</sup>H NMR** (400 MHz, Chloroform-*d*)  $\delta$  (ppm) = 7.75 – 7.69 (m, 2H), 7.64 – 7.55 (m, 3H), 7.52 – 7.44 (m, 2H), 7.29 – 7.21 (m, 3H), 7.19 – 7.11 (m, 2H), 6.81 – 6.75 (m, 2H).

**<sup>13</sup>C NMR** (101 MHz, Chloroform-*d*)  $\delta$  (ppm) = 195.4, 153.2 (t,  $J$  = 29.1 Hz), 149.7, 137.6, 134.9, 134.1, 132.3, 131.0, 129.8, 129.6, 129.2, 128.3, 126.3, 118.3, 118.3 (qt,  $J$  = 287.7, 35.7 Hz), 109.9 (tq,  $J$  = 261.2, 37.0 Hz).

**<sup>19</sup>F NMR** (376 MHz, Chloroform-*d*)  $\delta$  (ppm) = -80.80 (s, 3F), -112.24 (s, 2F).

**HRMS (ESI) m/z:** [M + H]<sup>+</sup> Calcd for C<sub>22</sub>H<sub>15</sub>F<sub>5</sub>NOS 436.0789; Found 436.0785.

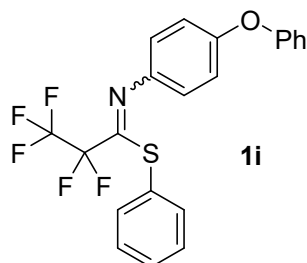

Chemical Formula: C<sub>21</sub>H<sub>14</sub>F<sub>5</sub>NOS

**phenyl 2,2,3,3,3-pentafluoro-*N*-(4-phenoxyphenyl)propanimidothioate (1i)**

**<sup>1</sup>H NMR** (400 MHz, Chloroform-*d*)  $\delta$  (ppm) = 7.37 – 7.30 (m, 2H), 7.29 – 7.16 (m, 5H), 7.10 (td,  $J$  = 7.5, 1.1 Hz, 1H), 6.95 – 6.89 (m, 2H), 6.87 – 6.79 (m, 4H).

**<sup>13</sup>C NMR** (101 MHz, Chloroform-*d*)  $\delta$  (ppm) = 157.2, 155.0, 150.5 (t,  $J$  = 29.3 Hz), 141.3, 134.2, 129.7, 129.1, 129.1, 127.2, 123.3, 121.3, 119.1, 118.6, 118.5 (qt,  $J$  = 287.4, 35.9 Hz), 110.2 (tq,  $J$  = 259.5, 36.5 Hz).

**<sup>19</sup>F NMR** (376 MHz, Chloroform-*d*)  $\delta$  (ppm) = -80.65 (s, 3F), -111.41 (s, 2F).

**HRMS (ESI) m/z:** [M + H]<sup>+</sup> Calcd for C<sub>21</sub>H<sub>15</sub>F<sub>5</sub>NOS 424.0789; Found 424.0788.

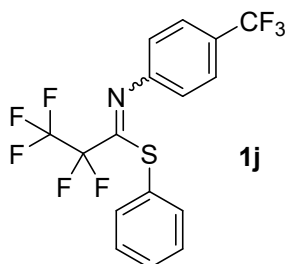

Chemical Formula: C<sub>16</sub>H<sub>9</sub>F<sub>8</sub>NS

**phenyl 2,2,3,3,3-pentafluoro-N-(4-(trifluoromethyl)phenyl)propanimidothioate (1j)**

<sup>1</sup>H NMR (400 MHz, Chloroform-*d*) δ (ppm) = 7.35 (d, *J* = 8.3 Hz, 2H), 7.24 – 7.16 (m, 3H), 7.14 – 7.07 (m, 2H), 6.73 (d, *J* = 8.2 Hz, 2H).

<sup>13</sup>C NMR (101 MHz, Chloroform-*d*) δ (ppm) = 153.9 (t, *J* = 29.2 Hz), 149.1, 135.0, 129.7, 129.2, 127.0 (q, *J* = 32.6 Hz), 126.2, 125.8 (q, *J* = 3.9 Hz), 124.0 (q, *J* = 271.7 Hz), 118.7, 118.4 (qt, *J* = 287.3, 35.6 Hz), 109.9 (tq, *J* = 260.2, 37.1 Hz).

<sup>19</sup>F NMR (376 MHz, Chloroform-*d*) δ (ppm) = -62.39 (s, 3F), -80.87 (s, 3F), -112.57 (s, 2F).

HRMS (ESI) *m/z*: [M + H]<sup>+</sup> Calcd for C<sub>16</sub>H<sub>10</sub>F<sub>8</sub>NS 400.0401; Found 400.0399.

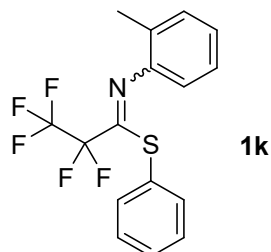

Chemical Formula: C<sub>16</sub>H<sub>12</sub>F<sub>5</sub>NS

**phenyl 2,2,3,3,3-pentafluoro-N-(o-tolyl)propanimidothioate (1k)**

<sup>1</sup>H NMR (400 MHz, Chloroform-*d*) δ (ppm) = 7.27 – 7.18 (m, 3H), 7.16 – 7.12 (m, 2H), 7.06 – 7.02 (m, 1H), 6.98 – 6.91 (m, 2H), 6.74 (d, *J* = 7.8 Hz, 1H), 1.98 (s, 3H).

<sup>13</sup>C NMR (101 MHz, Chloroform-*d*) δ (ppm) = 151.3 (t, *J* = 29.4 Hz), 145.1, 134.7, 130.2, 129.4, 128.9, 127.8, 126.7, 126.0, 125.7, 117.1, 118.5 (qt, *J* = 287.3, 35.3 Hz), 110.0 (tq, *J* = 259.6, 36.9 Hz).

<sup>19</sup>F NMR (376 MHz, Chloroform-*d*) δ (ppm) = -80.7 (s, 3F), -111.5 (s, 2F).

HRMS (ESI) *m/z*: [M + H]<sup>+</sup> Calcd for C<sub>16</sub>H<sub>13</sub>F<sub>5</sub>NS 346.0683; Found 346.0684.

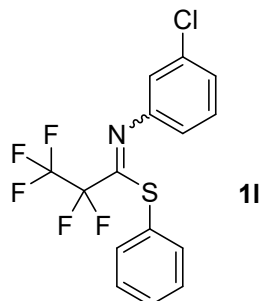

Chemical Formula: C<sub>15</sub>H<sub>9</sub>ClF<sub>5</sub>NS

**phenyl N-(3-chlorophenyl)-2,2,3,3,3-pentafluoropropanimidothioate (1l)**



**<sup>1</sup>H NMR** (400 MHz, Chloroform-*d*)  $\delta$  (ppm) = 7.26 – 7.20 (m, 3H), 7.18 – 7.13 (m, 2H), 7.07 (t,  $J$  = 8.0 Hz, 1H), 6.94 (ddd,  $J$  = 8.0, 2.0, 1.0 Hz, 1H), 6.68 (t,  $J$  = 2.0 Hz, 1H), 6.61 (ddd,  $J$  = 7.9, 2.0, 1.0 Hz, 1H).

**<sup>13</sup>C NMR** (101 MHz, Chloroform-*d*)  $\delta$  (ppm) = 153.3 (t,  $J$  = 29.0 Hz), 147.1, 134.8, 134.4, 129.7, 129.6, 129.1, 126.2, 125.2, 119.0, 118.4 (qt,  $J$  = 287.3, 35.6 Hz), 117.1, 110.0 (tq,  $J$  = 260.0, 36.8 Hz).

**<sup>19</sup>F NMR** (376 MHz, Chloroform-*d*)  $\delta$  (ppm) = -80.80 (s, 3F), -112.11 (s, 2F).

**HRMS (ESI) m/z:** [M + H]<sup>+</sup> Calcd for C<sub>15</sub>H<sub>10</sub>ClF<sub>5</sub>NS 366.0137; Found 366.0136.

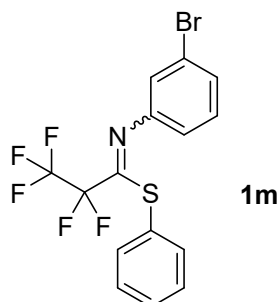

Chemical Formula: C<sub>15</sub>H<sub>9</sub>BrF<sub>5</sub>NS

**phenyl N-(3-bromophenyl)-2,2,3,3,3-pentafluoropropanimidothioate (1m)**

**<sup>1</sup>H NMR** (400 MHz, Chloroform-*d*)  $\delta$  (ppm) = 7.23 (dtd,  $J$  = 6.9, 3.2, 1.2 Hz, 3H), 7.18 – 7.13 (m, 2H), 7.09 (ddd,  $J$  = 8.0, 1.9, 1.1 Hz, 1H), 7.00 (t,  $J$  = 7.9 Hz, 1H), 6.83 (t,  $J$  = 1.9 Hz, 1H), 6.66 (ddd,  $J$  = 7.9, 2.0, 1.1 Hz, 1H).

**<sup>13</sup>C NMR** (101 MHz, Chloroform-*d*)  $\delta$  (ppm) = 153.3 (t,  $J$  = 29.2 Hz), 147.1, 134.8, 130.0, 129.6, 129.1, 128.0, 126.1, 122.4, 121.8, 118.3 (qt,  $J$  = 287.4, 35.7 Hz), 117.5, 110.4 (tq,  $J$  = 260.0, 36.9 Hz).

**<sup>19</sup>F NMR** (376 MHz, Chloroform-*d*)  $\delta$  (ppm) = -80.80 (s, 3F), -112.21 (s, 2F).

**HRMS (ESI) m/z:** [M + H]<sup>+</sup> Calcd for C<sub>15</sub>H<sub>10</sub>BrF<sub>5</sub>NS 409.9632; Found 409.9633.

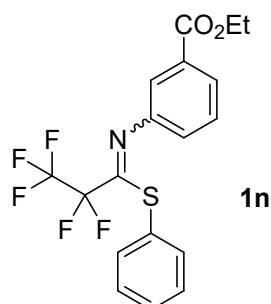

Chemical Formula: C<sub>18</sub>H<sub>14</sub>F<sub>5</sub>NO<sub>2</sub>S

**ethyl 3-((2,2,3,3,3-pentafluoro-1-(phenylthio)propylidene)amino)benzoate (1n)**

**<sup>1</sup>H NMR** (400 MHz, Chloroform-*d*)  $\delta$  (ppm) = 7.68 (dt,  $J$  = 7.9, 1.3 Hz, 1H), 7.36 (t,  $J$  = 1.8 Hz, 1H), 7.27 – 7.21 (m, 3H), 7.20 – 7.09 (m, 3H), 6.93 (ddd,  $J$  = 7.9, 2.2, 1.1 Hz, 1H), 4.37 (q,  $J$  = 7.1 Hz, 2H), 1.41 (t,  $J$  = 7.2 Hz, 3H).

**<sup>13</sup>C NMR** (101 MHz, Chloroform-*d*)  $\delta$  (ppm) = 165.8, 153.0 (t,  $J$  = 29.3 Hz), 146.1, 134.7, 131.0, 129.4, 129.1, 128.7, 126.4, 126.3, 123.2, 112.0, 118.5 (qt,  $J$  = 288.6, 35.4 Hz), 110.4 (tq,  $J$  = 260.3, 36.3 Hz).

**<sup>19</sup>F NMR** (376 MHz, Chloroform-*d*)  $\delta$  (ppm) = -80.74 (s, 3F), -111.91 (s, 2F).

**HRMS (ESI) m/z:** [M + H]<sup>+</sup> Calcd for C<sub>18</sub>H<sub>15</sub>F<sub>5</sub>NO<sub>2</sub>S 404.0738; Found 404.0735.

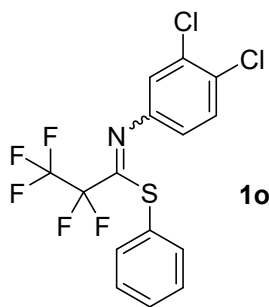

Chemical Formula:  $C_{15}H_8Cl_2F_5NS$

**phenyl *N*-(3,4-dichlorophenyl)-2,2,3,3,3-pentafluoropropanimidothioate (1o)**

$^1H$  NMR (400 MHz, Chloroform-*d*)  $\delta$  (ppm) = 7.29 – 7.14 (m, 6H), 6.75 (d,  $J$  = 2.4 Hz, 1H), 6.57 (dd,  $J$  = 8.5, 2.4 Hz, 1H).

$^{13}C$  NMR (101 MHz, Chloroform-*d*)  $\delta$  (ppm) = 154.1 (t,  $J$  = 29.0 Hz), 145.2, 134.8, 132.5, 130.2, 129.7, 129.2, 128.7, 126.0, 120.8, 118.5, 118.3 (qt,  $J$  = 287.5, 35.6 Hz), 109.8 (tq,  $J$  = 261.2, 37.1 Hz).

$^{19}F$  NMR (376 MHz, Chloroform-*d*)  $\delta$  (ppm) = -80.85 (s, 3F), -112.48 (s, 2F).

HRMS (ESI)  $m/z$ :  $[M + H]^+$  Calcd for  $C_{15}H_9Cl_2F_5NS$  399.9747; Found 399.9745.

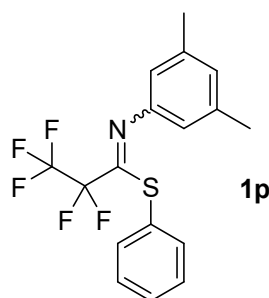

Chemical Formula:  $C_{17}H_{14}F_5NS$

**phenyl *N*-(3,5-dimethylphenyl)-2,2,3,3,3-pentafluoropropanimidothioate (1p)**

$^1H$  NMR (400 MHz, Chloroform-*d*)  $\delta$  (ppm) = 7.29 – 7.24 (m, 2H), 7.22 – 7.12 (m, 3H), 6.64 (s, 1H), 6.37 (s, 2H), 2.20 (s, 6H).

$^{13}C$  NMR (101 MHz, Chloroform-*d*)  $\delta$  (ppm) = 150.9 (t,  $J$  = 29.6 Hz), 146.2, 138.4, 134.7, 129.1, 128.8, 127.1, 127.0, 118.5 (qt,  $J$  = 287.4, 35.9 Hz), 116.6, 110.2 (tq,  $J$  = 259.7, 36.4 Hz).

$^{19}F$  NMR (376 MHz, Chloroform-*d*)  $\delta$  (ppm) = -80.71 (s, 3F), -111.14 (s, 2F).

HRMS (ESI)  $m/z$ :  $[M + H]^+$  Calcd for  $C_{17}H_{15}F_5NS$  360.0840; Found 360.0837.

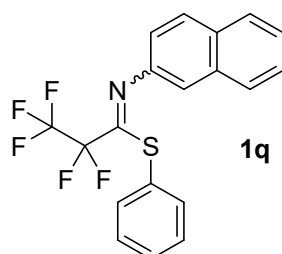

Chemical Formula:  $C_{19}H_{12}F_5NS$

**phenyl 2,2,3,3,3-pentafluoro-*N*-(naphthalen-2-yl)propanimidothioate (1q)**

$^1H$  NMR (400 MHz, Chloroform-*d*)  $\delta$  (ppm) = 7.75 – 7.61 (m, 3H), 7.47 – 7.36 (m, 2H), 7.25 – 7.19 (m, 2H), 7.17 (d,  $J$  = 2.0 Hz, 1H), 7.09 – 6.94 (m, 4H).

$^{13}\text{C}$  NMR (101 MHz, Chloroform-*d*)  $\delta$  (ppm) = 152.0 (t,  $J$  = 29.5 Hz), 143.8, 134.7, 133.2, 131.3, 129.2, 128.8, 128.7, 127.7, 127.6, 126.7, 126.5, 125.5, 119.2, 118.5 (qt,  $J$  = 287.3, 35.7 Hz), 116.0, 110.2 (tq,  $J$  = 259.8, 36.6 Hz).

$^{19}\text{F}$  NMR (376 MHz, Chloroform-*d*)  $\delta$  (ppm) = -80.64 (s, 3F), -111.14 (s, 2F).

HRMS (ESI)  $m/z$ :  $[M + H]^+$  Calcd for  $\text{C}_{19}\text{H}_{13}\text{F}_5\text{NS}$  382.0683; Found 382.0682.

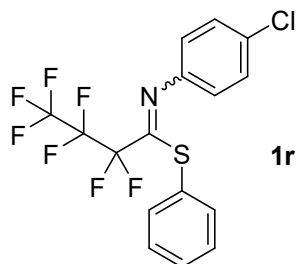

Chemical Formula:  $\text{C}_{16}\text{H}_9\text{ClF}_7\text{NS}$

**phenyl *N*-(4-chlorophenyl)-2,2,3,3,4,4,4-heptafluorobutanimidothioate (1r)**

$^1\text{H}$  NMR (400 MHz, Chloroform-*d*)  $\delta$  (ppm) = 7.24 – 7.19 (m, 1H), 7.18 – 7.09 (m, 4H), 7.08 – 7.01 (m, 2H), 6.66 – 6.58 (m, 2H).

$^{13}\text{C}$  NMR (101 MHz, Chloroform-*d*)  $\delta$  (ppm) = 152.4 (t,  $J$  = 27.7 Hz), 144.6, 134.3, 130.7, 129.3, 129.1, 128.6, 126.7, 120.2. carbons corresponding to the  $\text{C}_3\text{F}_7$  group cannot be identified due to C-F coupling.

$^{19}\text{F}$  NMR (376 MHz, Chloroform-*d*)  $\delta$  (ppm) = -79.87 (t,  $J$  = 9.3 Hz, 3F), -109.77 (q,  $J$  = 9.4 Hz, 2F), -123.50 – -124.37 (m, 2F).

HRMS (ESI)  $m/z$ :  $[M + H]^+$  Calcd for  $\text{C}_{16}\text{H}_{10}\text{ClF}_7\text{NS}$  416.0105; Found 416.0104.

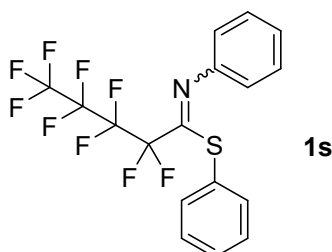

Chemical Formula:  $\text{C}_{17}\text{H}_{10}\text{F}_9\text{NS}$

**phenyl 2,2,3,3,4,4,5,5,5-nonafluoro-*N*-phenylpentanimidothioate (1s)**

$^1\text{H}$  NMR (400 MHz, Chloroform-*d*)  $\delta$  (ppm) = 7.21 – 7.07 (m, 7H), 7.01 – 6.95 (m, 1H), 6.75 – 6.69 (m, 2H).

$^{13}\text{C}$  NMR (101 MHz, Chloroform-*d*)  $\delta$  (ppm) = 151.4 (t,  $J$  = 28.0 Hz), 146.1, 134.3, 129.1, 129.0, 128.6, 127.1, 125.4, 118.9. carbons corresponding to the  $\text{C}_4\text{F}_9$  group cannot be identified due to C-F coupling.

$^{19}\text{F}$  NMR (376 MHz, Chloroform-*d*)  $\delta$  (ppm) = -80.94 (t,  $J$  = 9.8 Hz, 3F), -108.53 (t,  $J$  = 12.8 Hz, 2F), -120.66 (dddt,  $J$  = 13.3, 9.9, 6.5, 3.5 Hz, 2F), -124.77 (tt,  $J$  = 12.9, 4.1 Hz, 2F).

HRMS (ESI)  $m/z$ :  $[M + H]^+$  Calcd for  $\text{C}_{17}\text{H}_{11}\text{F}_9\text{NS}$  432.0463; Found 432.0460.

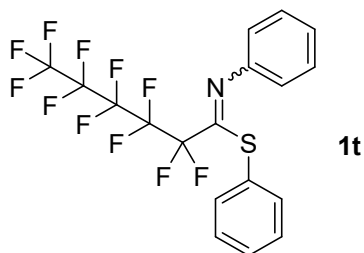

Chemical Formula: C<sub>18</sub>H<sub>10</sub>F<sub>11</sub>NS

**phenyl 2,2,3,3,4,4,5,5,6,6,6-undecafluoro-N-phenylhexanimidothioate (1t)**

<sup>1</sup>H NMR (400 MHz, Chloroform-*d*) δ (ppm) = 7.20 – 7.05 (m, 7H), 7.00 – 6.94 (m, 1H), 6.71 (d, *J* = 7.7 Hz, 2H).

<sup>13</sup>C NMR (101 MHz, Chloroform-*d*) δ (ppm) = 151.4 (t, *J* = 27.9 Hz), 146.2, 134.2, 129.1, 129.0, 128.6, 127.1, 125.3, 118.9. carbons corresponding to the C<sub>5</sub>F<sub>11</sub> group cannot be identified due to C-F coupling.

<sup>19</sup>F NMR (376 MHz, Chloroform-*d*) δ (ppm) = -80.76 (t, *J* = 10.3 Hz, 3F), -108.38 (t, *J* = 13.9 Hz, 2F), -119.99 (p, *J* = 8.4 Hz, 2F), -121.49 – -121.65 (m, 2F), -126.19 (tt, *J* = 13.7, 3.9 Hz, 2F).

**HRMS (ESI) m/z:** [M + H]<sup>+</sup> Calcd for C<sub>18</sub>H<sub>10</sub>F<sub>11</sub>NS 482.0431; Found 482.0428.

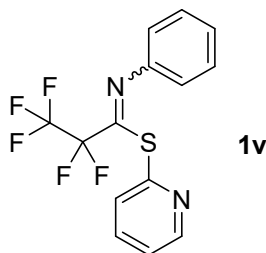

Chemical Formula: C<sub>14</sub>H<sub>9</sub>F<sub>5</sub>N<sub>2</sub>S

**pyridin-2-yl 2,2,3,3,3-pentafluoro-N-phenylpropanimidothioate (1v)**

<sup>1</sup>H NMR (400 MHz, Chloroform-*d*) δ (ppm) = 8.36 (ddd, *J* = 4.9, 2.0, 0.9 Hz, 1H), 7.41 (td, *J* = 7.7, 1.9 Hz, 1H), 7.22 – 7.16 (m, 2H), 7.13 (dt, *J* = 7.9, 1.0 Hz, 1H), 7.07 – 7.00 (m, 2H), 6.91 – 6.85 (m, 2H).

<sup>13</sup>C NMR (101 MHz, Chloroform-*d*) δ (ppm) = 152.1, 150.2, 148.6 (t, *J* = 29.9 Hz), 136.8, 128.6, 126.9, 126.0, 122.3, 119.3, 118.5 (qt, *J* = 287.5, 36.0 Hz), 109.7 (tq, *J* = 259.5, 36.8 Hz).

<sup>19</sup>F NMR (376 MHz, Chloroform-*d*) δ (ppm) = -80.91 (s, 3F), -112.59 (s, 2F).

**HRMS (ESI) m/z:** [M + H]<sup>+</sup> Calcd for C<sub>14</sub>H<sub>9</sub>F<sub>5</sub>N<sub>2</sub>S 333.0479; Found 333.0478.

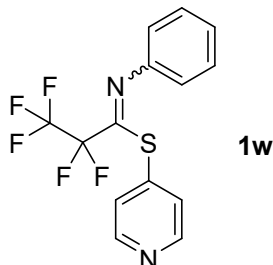

Chemical Formula: C<sub>14</sub>H<sub>9</sub>F<sub>5</sub>N<sub>2</sub>S

**pyridin-4-yl 2,2,3,3,3-pentafluoro-N-phenylpropanimidothioate (1w)**

<sup>1</sup>H NMR (400 MHz, Chloroform-*d*) δ (ppm) = 8.38 – 8.31 (m, 2H), 7.23 – 7.16 (m, 2H), 7.10 – 7.03 (m, 3H), 6.86 – 6.80 (m, 2H).

$^{13}\text{C}$  NMR (101 MHz, Chloroform-*d*)  $\delta$  (ppm) = 149.9, 148.1 (t,  $J$  = 30.0 Hz), 145.7, 138.6, 128.8, 126.9, 126.4, 119.3, 118.3 (qt,  $J$  = 287.4, 35.8 Hz), 109.4 (tq,  $J$  = 259.3, 37 Hz).

$^{19}\text{F}$  NMR (376 MHz, Chloroform-*d*)  $\delta$  (ppm) = -80.74 (s, 3F), -112.04 (s, 2F).

HRMS (ESI)  $m/z$ :  $[\text{M} + \text{H}]^+$  Calcd for  $\text{C}_{14}\text{H}_{10}\text{F}_5\text{N}_2\text{S}$  333.0479; Found 333.0478.

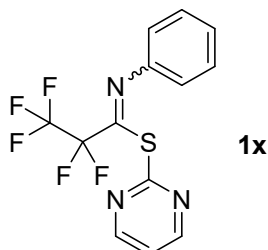

Chemical Formula:  $\text{C}_{13}\text{H}_8\text{F}_5\text{N}_3\text{S}$

**pyrimidin-2-yl 2,2,3,3,3-pentafluoro-*N*-phenylpropanimidothioate (1x)**

$^1\text{H}$  NMR (400 MHz, Chloroform-*d*)  $\delta$  (ppm) = 8.45 (d,  $J$  = 4.9 Hz, 2H), 7.30 – 7.25 (m, 2H), 7.16 – 7.11 (m, 1H), 7.03 – 6.96 (m, 3H).

$^{13}\text{C}$  NMR (101 MHz, Chloroform-*d*)  $\delta$  (ppm) = 167.8, 157.8, 146.6, 145.9 (t,  $J$  = 30.2 Hz), 128.7, 126.6, 119.5, 118.6 (qt,  $J$  = 287.6, 36.3 Hz), 118.3, 109.3 (tq,  $J$  = 259.1, 36.8 Hz).

$^{19}\text{F}$  NMR (376 MHz, Chloroform-*d*)  $\delta$  (ppm) = -81.06 (s, 3F), -113.32 (d,  $J$  = 2.0 Hz, 2F).

HRMS (ESI)  $m/z$ :  $[\text{M} + \text{H}]^+$  Calcd for  $\text{C}_{13}\text{H}_9\text{F}_5\text{N}_3\text{S}$  334.0432; Found 334.0430.

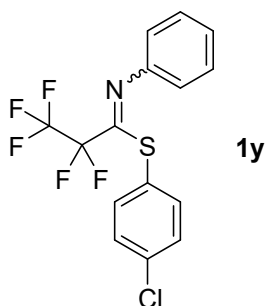

Chemical Formula:  $\text{C}_{15}\text{H}_9\text{ClF}_5\text{NS}$

**4-chlorophenyl 2,2,3,3,3-pentafluoro-*N*-phenylpropanimidothioate (1y)**

$^1\text{H}$  NMR (400 MHz, Chloroform-*d*)  $\delta$  (ppm) = 7.26 – 7.16 (m, 4H), 7.15 – 7.05 (m, 3H), 6.78 – 6.73 (m, 2H).

$^{13}\text{C}$  NMR (101 MHz, Chloroform-*d*)  $\delta$  (ppm) = 151.2 (t,  $J$  = 29.7 Hz), 146.2, 136.0, 135.9, 129.2, 128.8, 125.6, 125.2, 118.9, 118.3 (qt,  $J$  = 287.2, 35.6 Hz), 110.1 (tq,  $J$  = 259.7, 36.7 Hz).

$^{19}\text{F}$  NMR (376 MHz, Chloroform-*d*)  $\delta$  (ppm) = -80.70 (s, 3F), -111.21 (s, 2F).

HRMS (ESI)  $m/z$ :  $[\text{M} + \text{H}]^+$  Calcd for  $\text{C}_{15}\text{H}_{10}\text{ClF}_5\text{NS}$  336.0137; Found 336.0135.

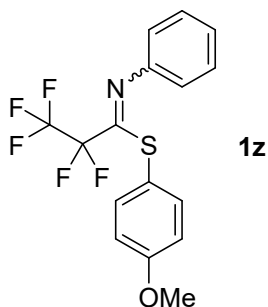

Chemical Formula:  $\text{C}_{16}\text{H}_{12}\text{F}_5\text{NOS}$

#### 4-methoxyphenyl 2,2,3,3,3-pentafluoro-*N*-phenylpropanimidothioate (**1z**)

<sup>1</sup>H NMR (400 MHz, Chloroform-*d*)  $\delta$  (ppm) = 7.26 – 7.19 (m, 4H), 7.09 – 7.03 (m, 1H), 6.81 – 6.76 (m, 2H), 6.73 – 6.67 (m, 2H), 3.75 (s, 3H).

<sup>13</sup>C NMR (101 MHz, Chloroform-*d*)  $\delta$  (ppm) = 159.7, 151.9 (t,  $J$  = 29.6 Hz), 145.4, 135.9, 127.7, 124.3, 117.9, 117.4 (qt,  $J$  = 287.4, 35.6 Hz), 109.4 (tq,  $J$  = 260.0, 36.4 Hz), 115.9, 113.6, 54.3.

<sup>19</sup>F NMR (376 MHz, Chloroform-*d*)  $\delta$  (ppm) = -80.67 (s, 3F), -110.84 (s, 2F).

HRMS (ESI)  $m/z$ : [M + H]<sup>+</sup> Calcd for C<sub>16</sub>H<sub>13</sub>F<sub>5</sub>NOS 362.0633; Found 362.0631.

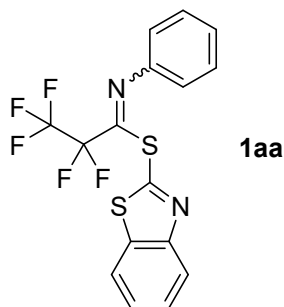

Chemical Formula: C<sub>16</sub>H<sub>9</sub>F<sub>5</sub>N<sub>2</sub>S<sub>2</sub>

#### benzo[d]thiazol-2-yl 2,2,3,3,3-pentafluoro-*N*-phenylpropanimidothioate (**1aa**)

<sup>1</sup>H NMR (400 MHz, Chloroform-*d*)  $\delta$  (ppm) = 7.91 (dd,  $J$  = 8.2, 0.9 Hz, 1H), 7.75 – 7.70 (m, 1H), 7.45 (ddd,  $J$  = 8.3, 7.2, 1.3 Hz, 1H), 7.37 (ddd,  $J$  = 8.3, 7.2, 1.2 Hz, 1H), 7.20 – 7.14 (m, 2H), 7.04 – 6.98 (m, 1H), 6.97 – 6.91 (m, 2H).

<sup>13</sup>C NMR (101 MHz, Chloroform-*d*)  $\delta$  (ppm) = 155.3, 152.8, 145.8 (t,  $J$  = 30.7 Hz), 145.8, 137.4, 128.7, 126.5, 125.9, 123.3, 121.1, 119.2, 118.3 (qt,  $J$  = 287.6, 35.8 Hz), 109.6 (tq,  $J$  = 260.2, 37.3 Hz).

<sup>19</sup>F NMR (376 MHz, Chloroform-*d*)  $\delta$  (ppm) = -80.84 (s, 3F), -112.01 (s, 2F).

HRMS (ESI)  $m/z$ : [M + H]<sup>+</sup> Calcd for C<sub>16</sub>H<sub>10</sub>F<sub>5</sub>N<sub>2</sub>S<sub>2</sub> 389.0200; Found 389.0199.

## 4. Derivatization of Products

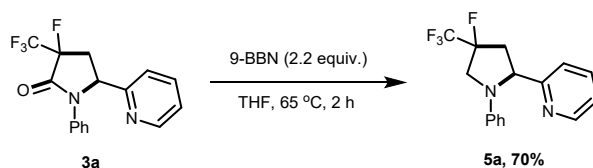

To a reaction vial was added **3a** (33.0 mg, 0.1 mmol, 1.0 equiv.) under N<sub>2</sub>. Subsequently, 9-BBN (0.5 M in THF, 0.5 mL, 2.2 equiv.) was added via syringe, and the reaction mixture was stirred at 65 °C for 2 hours. After completion, 1 M HCl and EtOAc were added. The two-phase mixture was separated, and then the aqueous phase was basified to pH > 10 with Na<sub>2</sub>CO<sub>3</sub> and extracted with EtOAc. The resulting organic layer was concentrated under reduced pressure. The residue was purified by column chromatography on silica gel to afford the desired product **5a** (21.6 mg, 70%).

<sup>1</sup>H NMR (400 MHz, Chloroform-*d*)  $\delta$  (ppm) = 8.64 – 8.58 (m, 1H), 7.59 (td,  $J$  = 7.7, 1.8 Hz, 1H), 7.30 – 7.14 (m, 4H), 6.83 – 6.75 (m, 1H), 6.51 (dd,  $J$  = 8.8, 1.1 Hz, 2H), 5.13 (dd,  $J$  = 9.7, 1.8 Hz, 1H), 4.16 – 4.03 (m, 1H), 4.02 – 3.88 (m, 1H), 3.08 – 2.88 (m, 1H), 2.75 – 2.60 (m, 1H).

$^{13}\text{C}$  NMR (101 MHz, Chloroform-*d*)  $\delta$  (ppm) = 161.5, 149.6, 145.6, 137.0, 129.4, 122.3, 120.3, 118.0, 112.6, 63.9, 54.6 (d,  $J$  = 24.2 Hz), 38.7 (d,  $J$  = 21.0 Hz).

$^{19}\text{F}$  NMR (376 MHz, Chloroform-*d*)  $\delta$  (ppm) = -80.34 (d,  $J$  = 6.2 Hz, 3F), -162.44 (q,  $J$  = 6.4 Hz, 1F).

HRMS (ESI)  $m/z$ :  $[M + H]^+$  Calcd for  $\text{C}_{16}\text{H}_{15}\text{F}_4\text{N}_2$  311.1166; Found 311.1164.

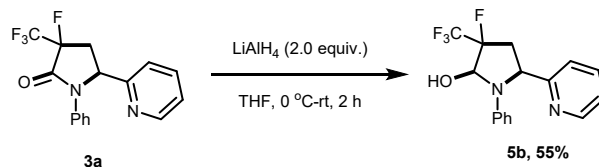

To a solution of **3a** (33.0 mg, 0.1 mmol, 1.0 equiv.) in THF (1.0 mL, 0.1 M) was slowly added lithium aluminum hydride (8.0 mg, 0.2 mmol, 2.0 equiv.), and the reaction mixture was stirred at r.t. for 2 hours. When the reaction was completed, the reaction was quenched with 1 M NaOH,  $\text{H}_2\text{O}$  and extracted with EtOAc. The separated organic layer was washed twice with water and once with brine, then dried over anhydrous  $\text{Na}_2\text{SO}_4$ , the resulting organic layer was concentrated under reduced pressure, and the crude product was purified by chromatography on silica gel to afford the desired product **5b** (18.0 mg, 55%).

$^1\text{H}$  NMR (400 MHz, Chloroform-*d*)  $\delta$  (ppm) = 8.49 (ddd,  $J$  = 4.9, 1.8, 0.9 Hz, 1H), 7.72 (td,  $J$  = 7.6, 1.8 Hz, 1H), 7.43 (d,  $J$  = 7.7 Hz, 1H), 7.24 – 7.11 (m, 3H), 6.84 (d,  $J$  = 7.7 Hz, 2H), 6.80 – 6.74 (m, 1H), 6.55 (d,  $J$  = 9.9 Hz, 1H), 5.75 (d,  $J$  = 9.9 Hz, 1H), 5.17 (dt,  $J$  = 8.9, 3.2 Hz, 1H), 3.07 (td,  $J$  = 14.7, 8.9 Hz, 1H), 2.51 – 2.36 (m, 1H).

$^{13}\text{C}$  NMR (101 MHz, Chloroform-*d*)  $\delta$  (ppm) = 159.8, 149.9, 142.8, 137.6, 129.2, 123.0, 122.5, 119.3, 114.2, 80.9 (d,  $J$  = 20.3 Hz), 61.0, 37.0 (d,  $J$  = 22.7 Hz).

$^{19}\text{F}$  NMR (376 MHz, Chloroform-*d*)  $\delta$  (ppm) = -80.30 (d,  $J$  = 9.5 Hz, 3F), -172.66 (q,  $J$  = 9.2 Hz, 1F).

HRMS (ESI)  $m/z$ :  $[M + H]^+$  Calcd for  $\text{C}_{16}\text{H}_{15}\text{F}_4\text{N}_2\text{O}$  327.1115; Found 327.1113.

## V. Mechanistic Studies

### 1. The Radical Trapping Experiments

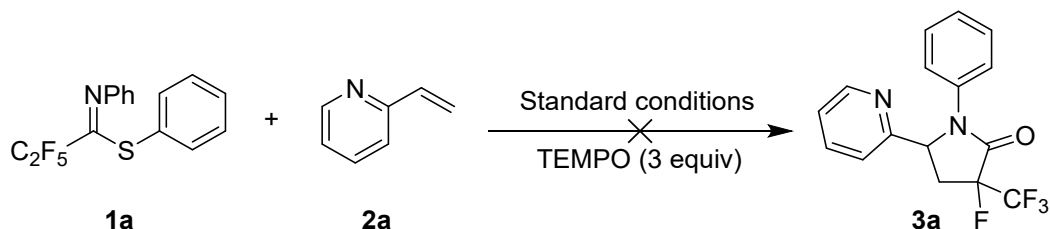

To a 10 mL pyrex glass tube which equipped with a magnetic stirring bar were added **1a** (0.2 mmol), **2a** (0.1 mmol),  $\text{Cs}_2\text{CO}_3$  (0.2 mmol),  $\text{H}_2\text{O}$  (10 equiv),  $\text{Ir}(\text{ppy})_3$  (0.001 mmol) followed by TEMPO (3.0 equiv) in dry  $\text{CH}_3\text{CN}$  (2 mL). The reaction mixture was stirred at rt and irradiated by

6W blue LEDs for 24 hours. The reaction was monitored by TLC. No desired product **3a** was observed.

## 2. For the Labeling experiments:

Reaction conditions: **1a** (0.2 mmol), **2a** (0.1 mmol), Cs<sub>2</sub>CO<sub>3</sub> (0.2 mmol), H<sub>2</sub><sup>18</sup>O (1 mmol), Ir(ppy)<sub>3</sub> (0.001 mmol), 6 W blue LEDs, rt, 24 h. Isolated yields.

The <sup>18</sup>O was determined by HRMS.

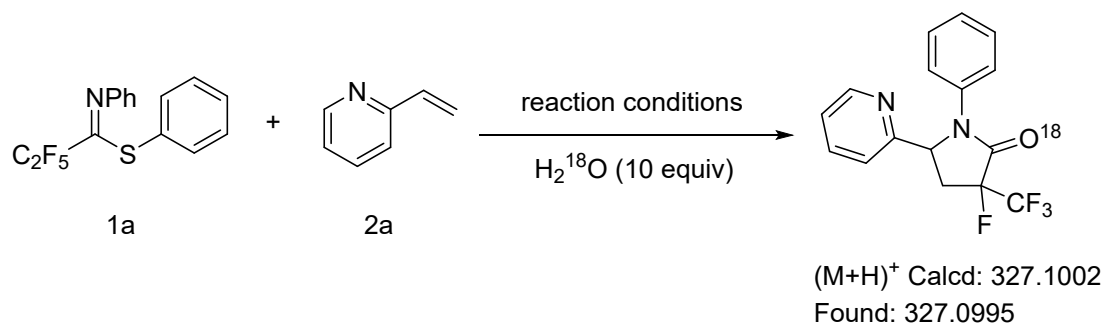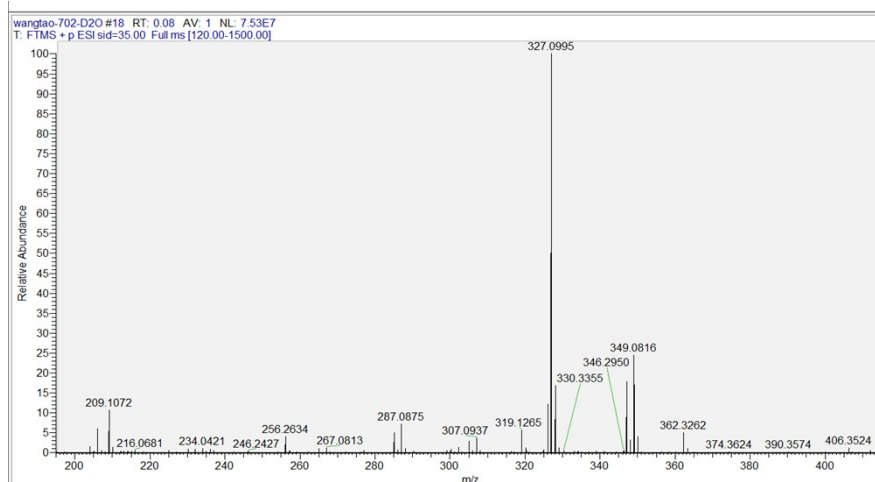

## 3. General procedure of the ESR experiments

EPR spectra were recorded at 300K using a Bruker A300 EPR spectrometer at 9.4447 GHz. The EPR parameters were set as the following: sweep width 120 G, center field 3362 G, time constant 81.92 ms, sweep time 60.00 s, microwave power 23.49 mW, modulation amplitude 1.00 G, modulation frequency 100 kHz, and receiver gain  $1.00 \times 10^4$ .

To gain more insight into the possible radical intermediates, EPR trapping experiments were conducted in the presence of a spin trapping agent, 5,5-dimethyl-1-pyrroline-N-oxide (DMPO) (33.9 mg). As a result, the formation of the DMPO spin adduct of radical was observed ( $a_N = 13.61$  G,  $a_H = 24.18$  G, and  $g = 2.0069$ ) by EPR and HRMS (ESI+) (Figure S1).



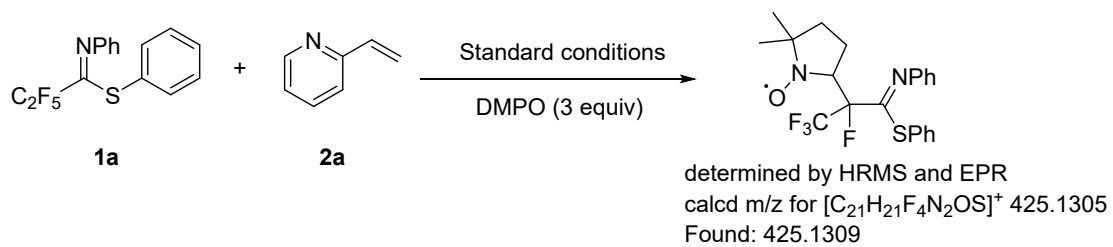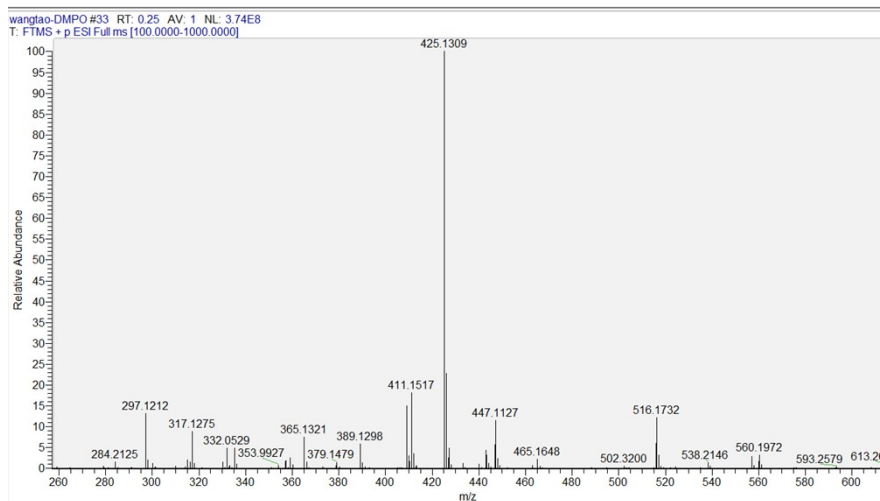

— without irradiation  
 — with irradiation

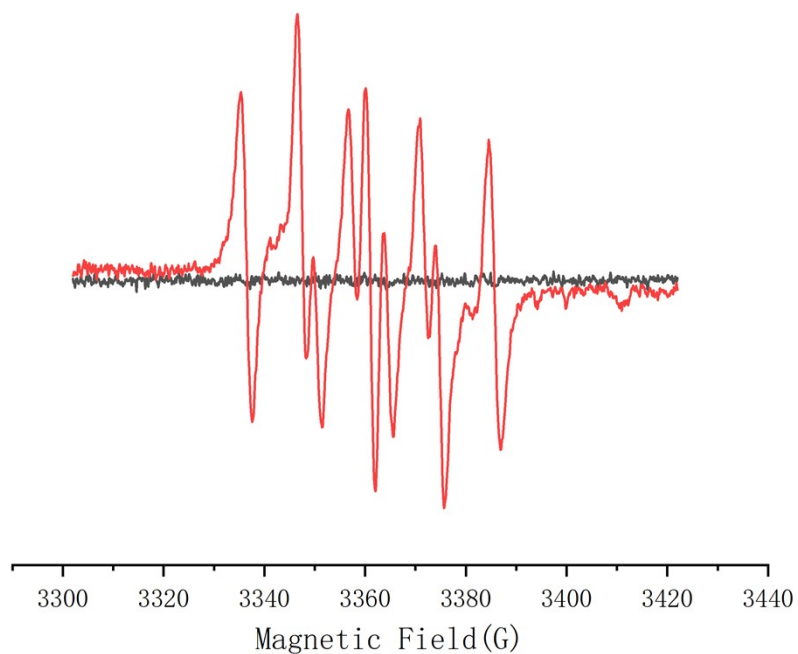

**Figure S1.** EPR spectra in the absence and presence of irradiation.

#### 4. The Cyclic Voltammetry Experiments

Cyclic voltammetry experiments were carried out on a CH electrochemical workstation using a glassy carbon working electrode, Hg/HgCl<sub>2</sub> reference electrode, and Pt wire counter electrode. The measurements were taken at room temperature in dry CH<sub>3</sub>CN containing 0.1 M Bu<sub>4</sub>NPF<sub>6</sub> as electrolyte. Scan Rate (V/s) = 0.05.

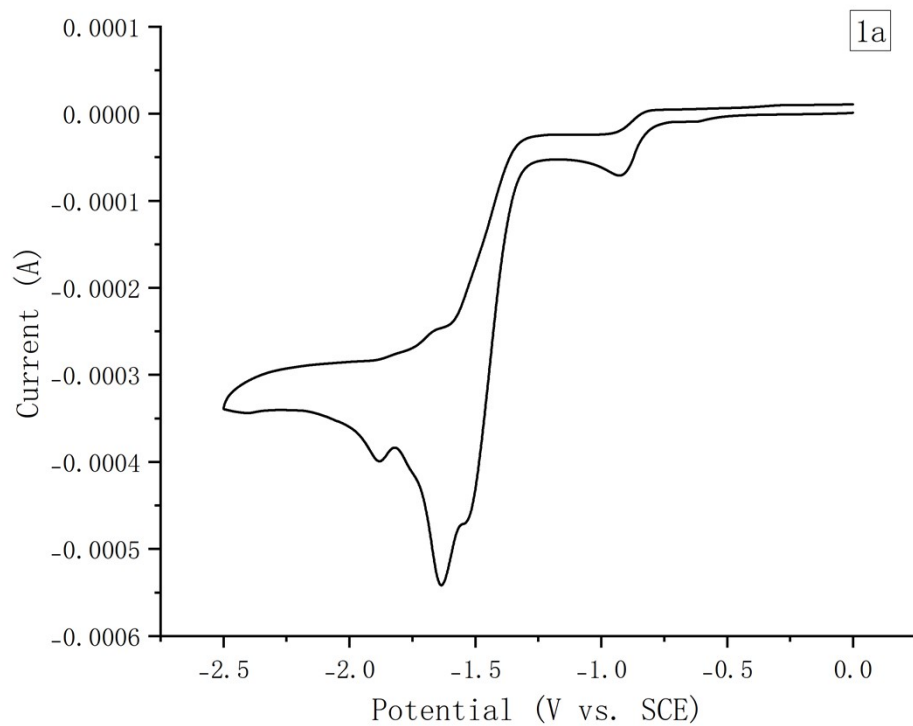

**Figure S2.** CV of 1a

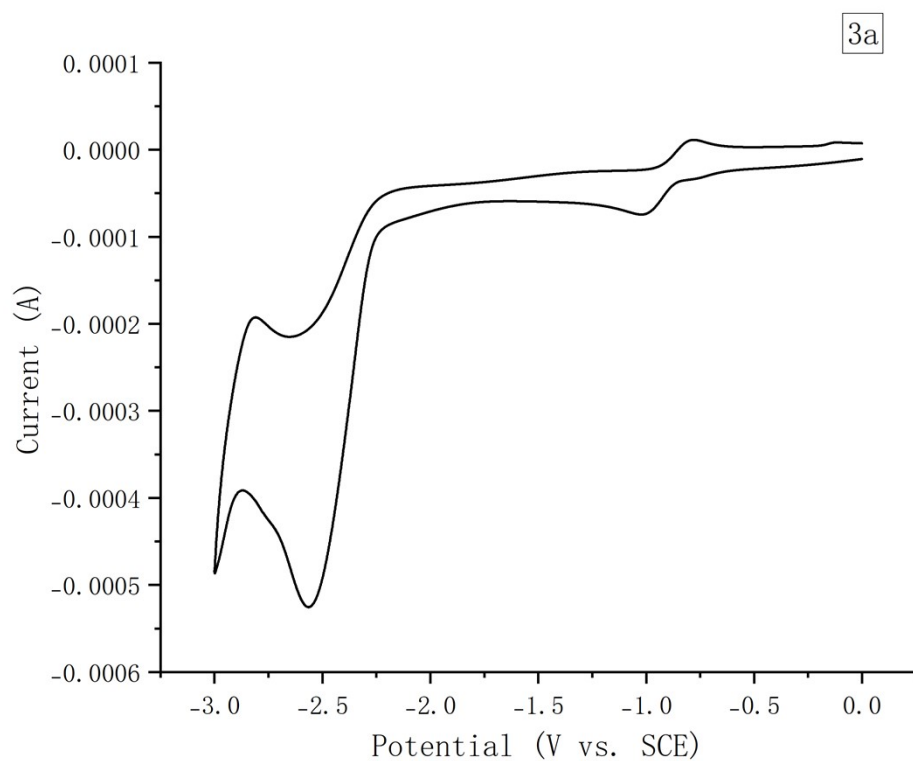

**Figure S3.** CV of **3a**

## **5. Quenching studies of Ir(ppy)<sub>3</sub> with **1a** and **2a****

Fluorescence quenching experiments were performed for a combination of Ir(ppy)<sub>3</sub> with **1a** or **2a** involved in the model reaction, and the results are depicted in respectively Figure S4 and Figure S5.

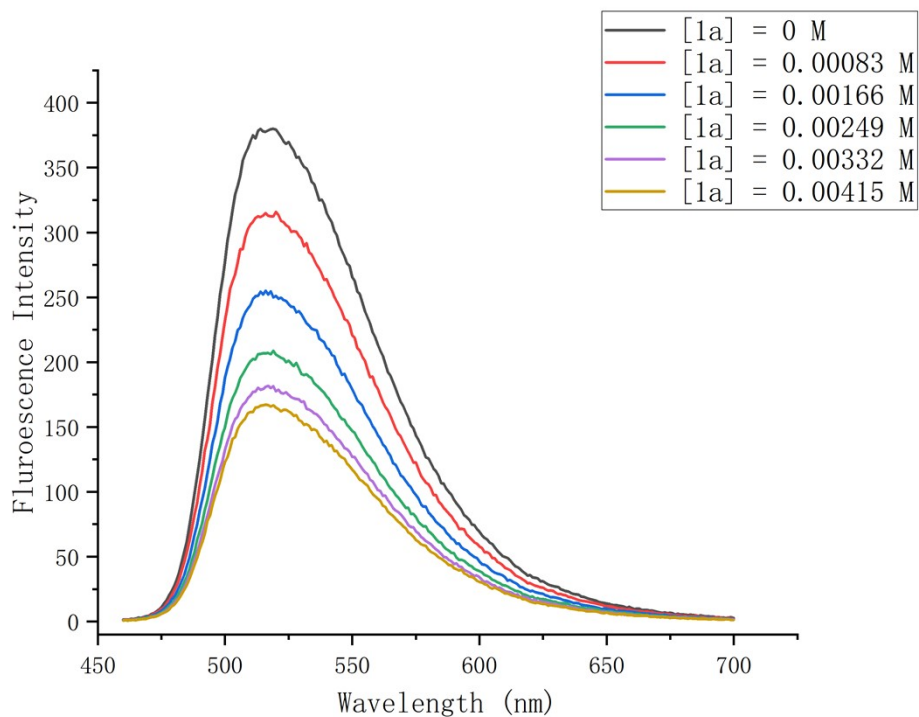

**Figure S4.** Fluorescence emission spectra of Ir(ppy)<sub>3</sub> in acetonitrile in the absence and presence of **1a**.

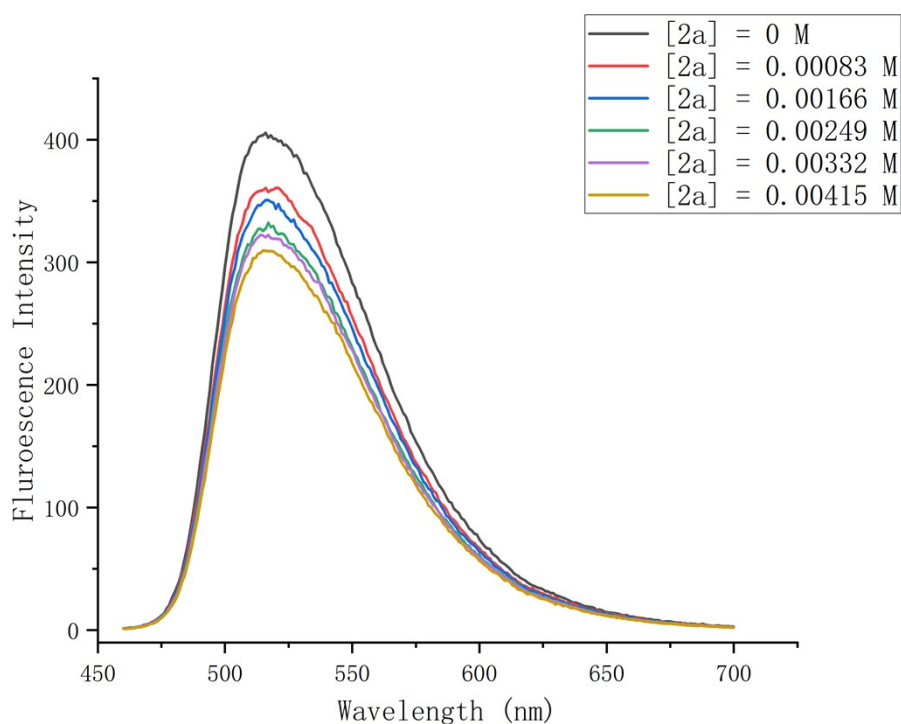

**Figure S5.** Fluorescence emission spectra of Ir(ppy)<sub>3</sub> in acetonitrile in the absence and presence of **2a**.

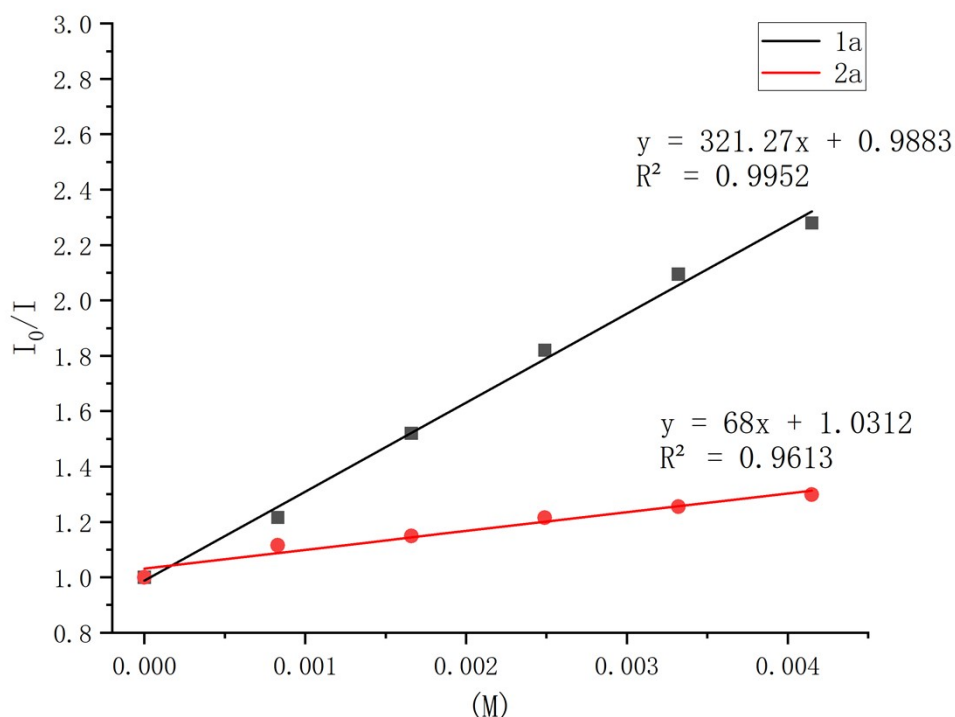

**Figure S6.** Stern-Volmer plot for the fluorescence quenching

## 6. Theoretical Calculations

**Computational Details** All calculations were performed using density functional theory as implemented within the Gaussian 16 (revision A.03) suite of programs<sup>4</sup>. Geometry optimizations were performed at the (U)M06-2X<sup>5-6</sup> level of theory with 6-311+ G(d,p) basis set, and vibrational frequencies of all the intermediates and transition states were performed at the (U)M06-2X/6-31+G(d,p). For modeling reactions conducted in solvent, solvation effects were incorporated using the SMD<sup>7</sup> model in geometry optimization, and frequency analysis (Acetonitrile,  $\epsilon = 35.688$ ). All stationary points were confirmed to have no imaginary frequencies. Reported Gibbs free energies and enthalpies include thermal corrections computed at 298.15 K and 1 atm, and are reported in kcal/mol using the conversion of 1 Hartree = 627.5095 kcal/mol. Molecular visualizations were created using CYLview<sup>8</sup>.

**(A)**

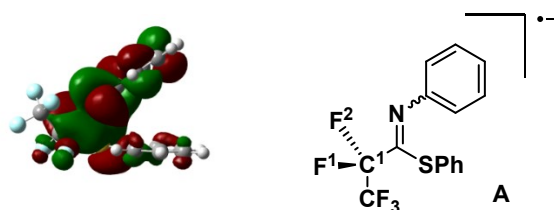

(B)

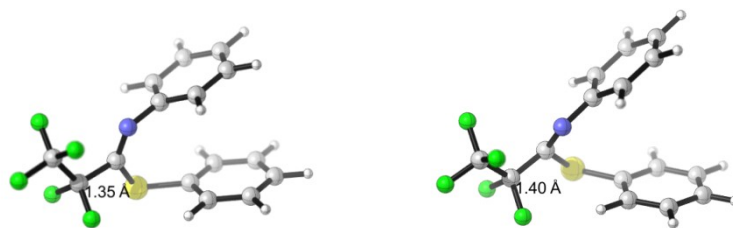

**Figure S7.** (A) SOMO of radical anion A. (B) The bond length of **1a** and radical anion A.

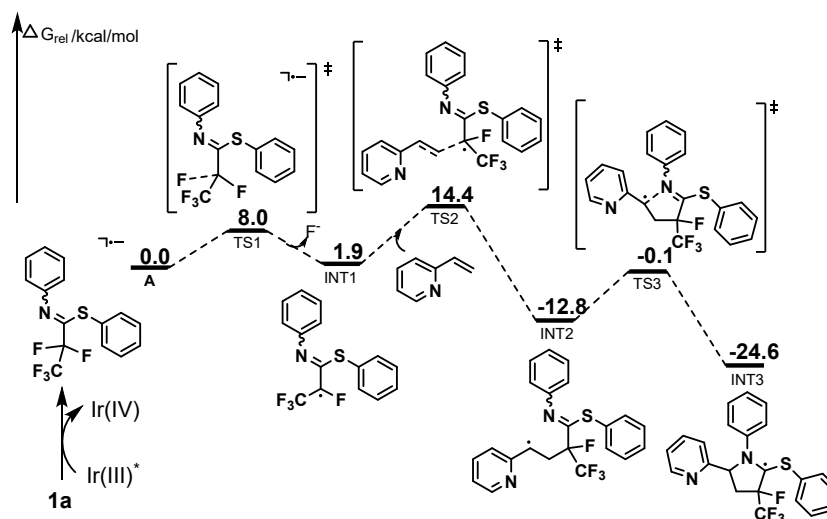

**Figure S8.** DFT calculated reaction energy profiles. Calculations were performed at the (U)M06-2X/6-31+G(d,p)/SMD(CH<sub>3</sub>CN) level of theory. Free energies are in kcal·mol<sup>-1</sup>.

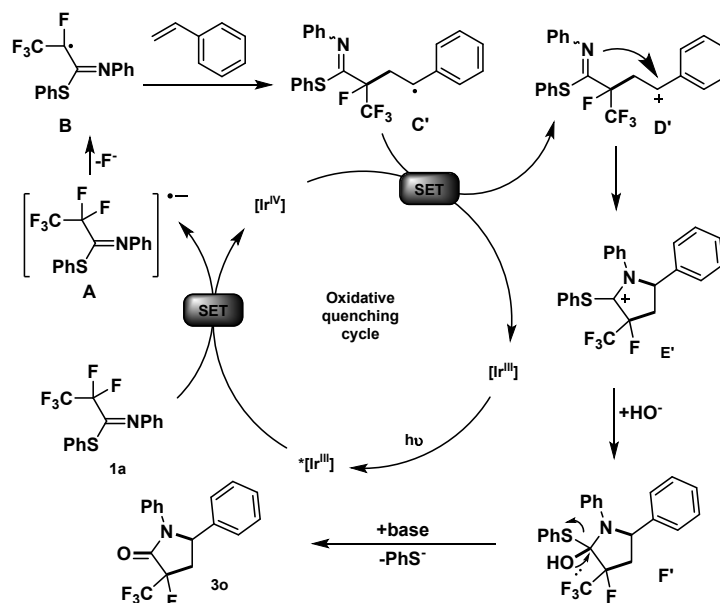

**Figure S9.** An alternative mechanism for styrene.

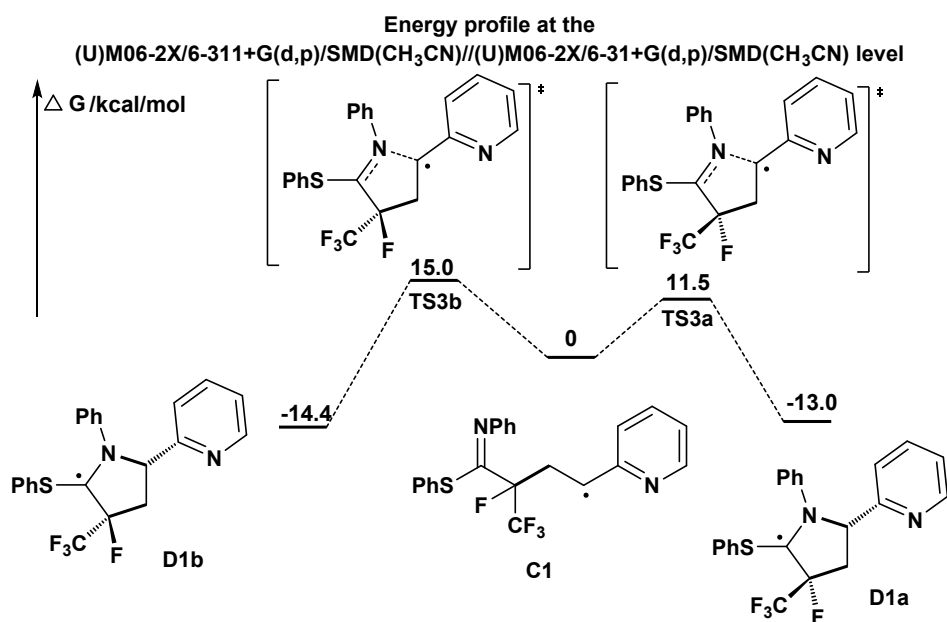

**Figure S10.** DFT-computed free energy changes of vinylpyridine to form **D1a** and **D1b**.

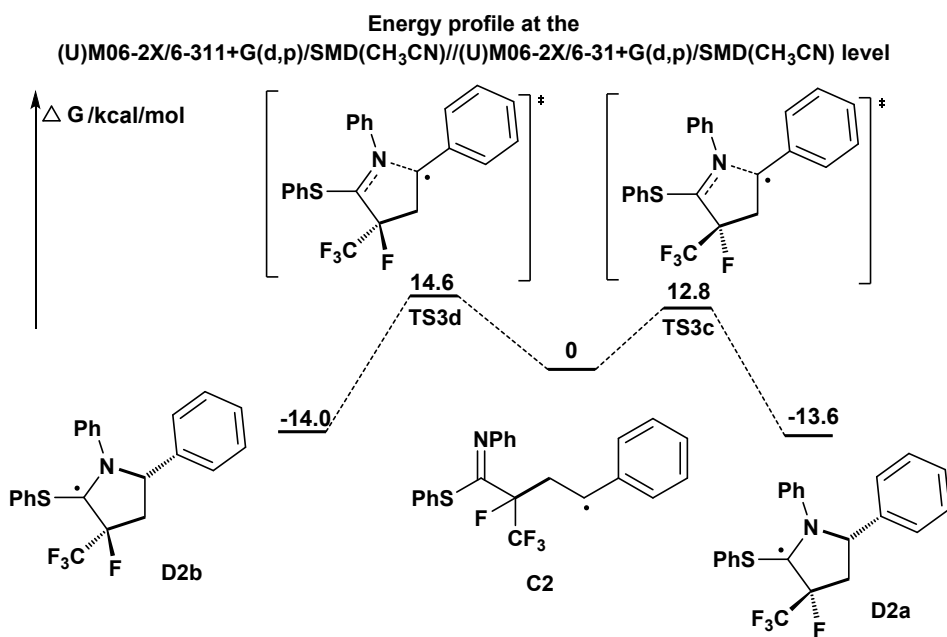

**Figure S11.** DFT-computed free energy changes of styrene to form **D2a** and **D2b**.

Energy profile at the  
(U)M06-2X/6-311G(d,p)/SMD(CH<sub>3</sub>CN)

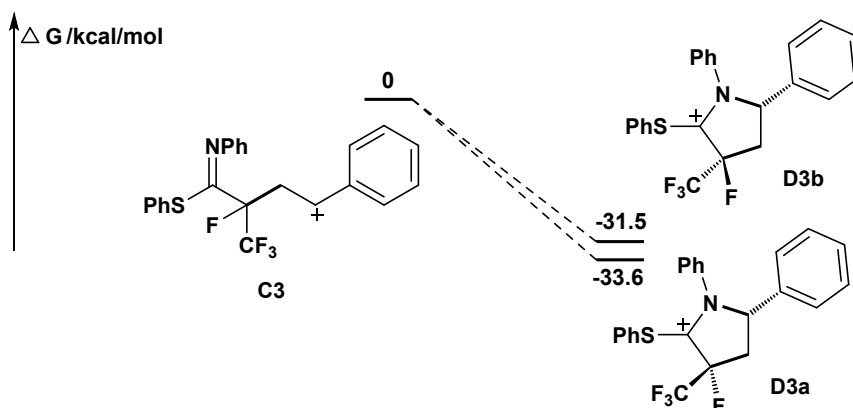

Figure S12. DFT-computed free energy changes of to form **D3a** and **D3b**.

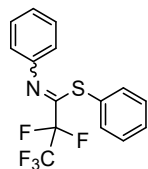

|   |             |             |             |
|---|-------------|-------------|-------------|
| C | -0.53302800 | 3.75714000  | 0.51900300  |
| C | -0.23133900 | 2.41160300  | 0.34143800  |
| C | 1.06195100  | 2.00529700  | -0.06806300 |
| C | 2.02580300  | 3.02334100  | -0.26325900 |
| C | 1.70957600  | 4.36199200  | -0.09263600 |
| C | 0.42349100  | 4.74713400  | 0.29680400  |
| N | 1.46635200  | 0.70378200  | -0.22599300 |
| C | 0.60733700  | -0.30356000 | -0.46534800 |
| C | 1.20198800  | -1.65233800 | -0.41557400 |
| S | -0.81401300 | -0.20266500 | -1.54297900 |
| C | -2.23542500 | -0.42532600 | -0.48032800 |
| C | -2.14102400 | -0.74265600 | 0.87432700  |
| C | -3.29919000 | -0.90194600 | 1.63209300  |
| C | -4.55448500 | -0.75270000 | 1.04933000  |
| C | -4.64569400 | -0.43916400 | -0.30575200 |
| C | -3.49508400 | -0.27531700 | -1.06906200 |
| F | 0.26207400  | -2.62158800 | -0.19850500 |
| F | 1.83159100  | -2.06414800 | -1.59304800 |
| C | 2.28122200  | -1.86073600 | 0.67041000  |
| F | 3.43405800  | -1.26828200 | 0.37173900  |
| F | 2.53904600  | -3.17181300 | 0.79922000  |
| F | 1.87025800  | -1.42073300 | 1.86035200  |
| H | -1.53095600 | 4.03503700  | 0.84319200  |
| H | -0.98610800 | 1.66511900  | 0.55397600  |
| H | 3.02664700  | 2.72885400  | -0.56190000 |



|   |             |             |             |
|---|-------------|-------------|-------------|
| H | 2.47282100  | 5.11486100  | -0.26037500 |
| H | 0.17745900  | 5.79364900  | 0.43284600  |
| H | -1.16536100 | -0.85928200 | 1.33369900  |
| H | -3.21444200 | -1.14610400 | 2.68538500  |
| H | -5.45233900 | -0.87851800 | 1.64303800  |
| H | -5.61667000 | -0.31776900 | -0.77301100 |
| H | -3.57503700 | -0.02776200 | -2.12292600 |

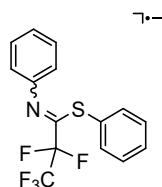

|   |             |             |             |
|---|-------------|-------------|-------------|
| C | -4.31002500 | -1.67081100 | -0.77659500 |
| C | -3.13812600 | -0.93978500 | -0.98764200 |
| C | -2.66027900 | -0.08344000 | 0.01898800  |
| C | -3.38191100 | 0.05826900  | 1.21763400  |
| C | -4.53259500 | -0.70023500 | 1.42950600  |
| C | -5.00244700 | -1.56558100 | 0.43340500  |
| N | -1.52382800 | 0.72566900  | -0.15017100 |
| C | -0.37885900 | 0.34816400  | -0.55009500 |
| C | 0.61057100  | 1.50859000  | -0.77370500 |
| S | 0.08382900  | -1.33493400 | -1.01916100 |
| C | 1.67119100  | -1.60782400 | -0.20858100 |
| C | 1.78252400  | -1.53809000 | 1.18650000  |
| C | 3.00370400  | -1.84130400 | 1.79487800  |
| C | 4.09878500  | -2.23752700 | 1.02003000  |
| C | 3.97434500  | -2.32560400 | -0.37024500 |
| C | 2.76338400  | -2.00545900 | -0.99059100 |
| F | 1.84520200  | 1.07366600  | -1.13754700 |
| F | 0.14968100  | 2.28886300  | -1.80472200 |
| C | 0.81767200  | 2.46207300  | 0.44584600  |
| F | -0.26686200 | 3.21191000  | 0.68788900  |
| F | 1.84812100  | 3.29497000  | 0.19731300  |
| F | 1.10900200  | 1.75672700  | 1.55380100  |
| H | -4.67956900 | -2.32313000 | -1.56261700 |
| H | -2.62412800 | -1.00121800 | -1.94147900 |
| H | -3.02200800 | 0.74828500  | 1.97483100  |
| H | -5.07199600 | -0.60393800 | 2.36737000  |
| H | -5.90903000 | -2.14141200 | 0.59482900  |
| H | 0.92830900  | -1.25303400 | 1.79249400  |
| H | 3.09260000  | -1.77794400 | 2.87564400  |
| H | 5.04340200  | -2.48016800 | 1.49819100  |
| H | 4.82084000  | -2.63443200 | -0.97683700 |

|                                                                                   |             |             |             |
|-----------------------------------------------------------------------------------|-------------|-------------|-------------|
| H                                                                                 | 2.67321500  | -2.05760000 | -2.07126900 |
| 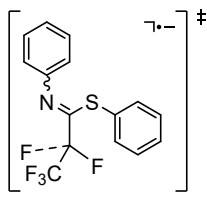 |             |             |             |
| C                                                                                 | -0.38594200 | -0.71496600 | 0.18278000  |
| C                                                                                 | 0.70794700  | 0.14537100  | 0.20031800  |
| C                                                                                 | 1.29153900  | 0.58820600  | -1.00114200 |
| C                                                                                 | 0.71381700  | 0.18104400  | -2.21944100 |
| C                                                                                 | -0.39091400 | -0.66706500 | -2.22740200 |
| C                                                                                 | -0.94129900 | -1.12994800 | -1.03032700 |
| N                                                                                 | 2.35504300  | 1.47990200  | -0.92533800 |
| C                                                                                 | 3.41589800  | 1.40695100  | -1.70704700 |
| C                                                                                 | 4.29419800  | 2.50698700  | -1.74226400 |
| S                                                                                 | 3.85338400  | 0.00223300  | -2.75590300 |
| C                                                                                 | 5.30821200  | -0.58501100 | -1.89604200 |
| C                                                                                 | 5.39790100  | -0.56400700 | -0.50039200 |
| C                                                                                 | 6.53255700  | -1.07556600 | 0.12684800  |
| C                                                                                 | 7.57022400  | -1.62683100 | -0.62738400 |
| C                                                                                 | 7.47019300  | -1.65782600 | -2.01793700 |
| C                                                                                 | 6.34625800  | -1.13134900 | -2.65569900 |
| F                                                                                 | 5.53204000  | 2.32491400  | -2.22297400 |
| F                                                                                 | 3.79243900  | 3.72548600  | -3.03481500 |
| C                                                                                 | 4.29905500  | 3.53879700  | -0.63006200 |
| F                                                                                 | 3.14632000  | 4.19446300  | -0.48799600 |
| F                                                                                 | 5.26355600  | 4.44812900  | -0.83577300 |
| F                                                                                 | 4.57216300  | 2.95908700  | 0.56147400  |
| H                                                                                 | -0.81114800 | -1.05829800 | 1.12163300  |
| H                                                                                 | 1.13729000  | 0.47849600  | 1.14119300  |
| H                                                                                 | 1.11180400  | 0.56229800  | -3.15573200 |
| H                                                                                 | -0.82752600 | -0.96337100 | -3.17708200 |
| H                                                                                 | -1.80018400 | -1.79384100 | -1.04235400 |
| H                                                                                 | 4.58744000  | -0.14923800 | 0.09362300  |
| H                                                                                 | 6.59941400  | -1.05033400 | 1.21055700  |
| H                                                                                 | 8.44997000  | -2.02818200 | -0.13391600 |
| H                                                                                 | 8.27329900  | -2.08032600 | -2.61452000 |
| H                                                                                 | 6.28212600  | -1.13840300 | -3.74031300 |
| F <sup>-</sup>                                                                    |             |             |             |
| F                                                                                 | 0.00000000  | 0.00000000  | 0.00000000  |
| 1                                                                                 |             |             |             |

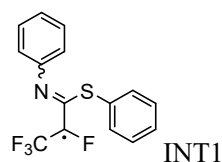

|   |          |          |          |
|---|----------|----------|----------|
| C | -3.99886 | -1.99792 | -0.81941 |
| C | -2.84358 | -1.22559 | -0.923   |
| C | -2.5443  | -0.25987 | 0.06918  |
| C | -3.45964 | -0.06999 | 1.13383  |
| C | -4.59281 | -0.86867 | 1.24224  |
| C | -4.8679  | -1.83793 | 0.26698  |
| N | -1.45451 | 0.58688  | 0.04109  |
| C | -0.25752 | 0.33006  | -0.44096 |
| C | 0.61711  | 1.42624  | -0.51708 |
| S | 0.33554  | -1.30042 | -0.99206 |
| C | 1.93374  | -1.42906 | -0.16988 |
| C | 2.05012  | -1.26236 | 1.21749  |
| C | 3.29158  | -1.44478 | 1.83197  |
| C | 4.40707  | -1.81878 | 1.0743   |
| C | 4.28089  | -2.00185 | -0.30597 |
| C | 3.04784  | -1.79956 | -0.93408 |
| F | 1.79856  | 1.32543  | -1.13793 |
| C | 0.33899  | 2.81147  | 0.01498  |
| F | -0.67954 | 3.4313   | -0.63584 |
| F | 1.43053  | 3.5948   | -0.12558 |
| F | 0.01498  | 2.80473  | 1.32982  |
| H | -4.22584 | -2.72332 | -1.59527 |
| H | -2.21232 | -1.32779 | -1.79834 |
| H | -3.24415 | 0.69593  | 1.87254  |
| H | -5.27216 | -0.72866 | 2.07797  |
| H | -5.76225 | -2.44931 | 0.34266  |
| H | 1.1832   | -0.99437 | 1.81383  |
| H | 3.38144  | -1.30662 | 2.90574  |
| H | 5.36794  | -1.96846 | 1.55816  |
| H | 5.1428   | -2.29075 | -0.90068 |
| H | 2.95715  | -1.92302 | -2.0091  |

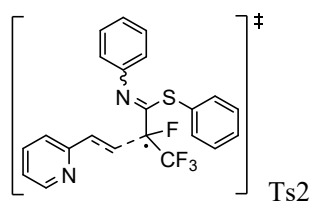

|   |            |            |            |
|---|------------|------------|------------|
| C | 2.99522500 | 2.75969000 | 0.26928600 |
| C | 2.10219400 | 1.71194400 | 0.07102700 |
| C | 1.38053100 | 1.19340000 | 1.15244700 |

|   |             |             |             |
|---|-------------|-------------|-------------|
| C | 1.58956000  | 1.72106000  | 2.43429700  |
| C | 2.46030100  | 2.78602000  | 2.61836700  |
| C | 3.16871600  | 3.30939600  | 1.53633200  |
| N | 0.51279800  | 0.10388600  | 1.04835500  |
| C | -0.35460000 | -0.06855300 | 0.12009000  |
| C | -1.10452200 | -1.30601900 | 0.18542300  |
| S | -0.70231500 | 1.03363200  | -1.26029400 |
| C | -2.46457000 | 1.20984800  | -1.02768700 |
| C | -3.01015500 | 1.39346600  | 0.24429400  |
| C | -4.38498700 | 1.55343700  | 0.38678300  |
| C | -5.21256800 | 1.56080900  | -0.73351300 |
| C | -4.66139800 | 1.39468200  | -2.00136600 |
| C | -3.29053200 | 1.20720300  | -2.15157600 |
| C | 0.32879500  | -2.94815300 | -0.57006600 |
| F | -2.06314500 | -1.52315200 | -0.71317000 |
| C | 1.55543300  | -2.59555100 | -0.11469300 |
| C | 2.43447900  | -1.68592600 | -0.84839200 |
| C | 3.68949000  | -1.33394200 | -0.33102300 |
| C | 4.51633400  | -0.49981400 | -1.07102300 |
| C | 4.07036800  | -0.03630300 | -2.30468700 |
| C | 2.79680700  | -0.42057700 | -2.72844000 |
| N | 1.99204700  | -1.21471600 | -2.02953900 |
| C | -1.45168300 | -1.92393200 | 1.52327000  |
| F | -2.23513600 | -2.99174500 | 1.33062400  |
| F | -2.13129000 | -1.05742300 | 2.29283900  |
| F | -0.38423400 | -2.31910300 | 2.21315300  |
| H | 3.55924500  | 3.14365400  | -0.57565300 |
| H | 1.99535700  | 1.26272600  | -0.91047000 |
| H | 1.04730200  | 1.28374000  | 3.26638900  |
| H | 2.59949900  | 3.20076700  | 3.61193200  |
| H | 3.86148000  | 4.13169000  | 1.68468200  |
| H | -2.36309900 | 1.40743600  | 1.11676400  |
| H | -4.80745100 | 1.68439600  | 1.37812600  |
| H | -6.28346800 | 1.69417900  | -0.61843700 |
| H | -5.30133400 | 1.39394000  | -2.87830700 |
| H | -2.86045700 | 1.04666900  | -3.13544300 |
| H | 0.02917600  | -2.66923100 | -1.57553300 |
| H | -0.25962900 | -3.70276600 | -0.05771600 |
| H | 1.90327800  | -2.93893800 | 0.85561800  |
| H | 3.99748700  | -1.71355700 | 0.63808700  |
| H | 5.49119900  | -0.21268100 | -0.68928400 |
| H | 4.68188900  | 0.61215200  | -2.92257100 |
| H | 2.40298700  | -0.06363500 | -3.67810200 |

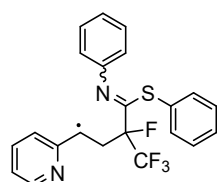

INT2

|   |             |             |             |
|---|-------------|-------------|-------------|
| C | 2.74278400  | 3.02663400  | 0.08812100  |
| C | 2.03322600  | 1.83113500  | 0.00639700  |
| C | 1.14180700  | 1.48490000  | 1.02558400  |
| C | 0.98357100  | 2.32504000  | 2.13275100  |
| C | 1.67463700  | 3.53080500  | 2.19068300  |
| C | 2.55964100  | 3.88434900  | 1.17120500  |
| N | 0.44906800  | 0.26080800  | 1.03274800  |
| C | -0.29780400 | -0.16022700 | 0.10495600  |
| C | -0.82730900 | -1.58647900 | 0.26725400  |
| S | -0.66829100 | 0.68421500  | -1.44292000 |
| C | -2.42778500 | 0.91177300  | -1.21168400 |
| C | -2.92944700 | 1.44591700  | -0.02346600 |
| C | -4.30054100 | 1.64724800  | 0.11665600  |
| C | -5.16615500 | 1.34464900  | -0.93322900 |
| C | -4.65764400 | 0.82825400  | -2.12411400 |
| C | -3.29057100 | 0.60006900  | -2.26325100 |
| C | 0.19994500  | -2.62169700 | -0.24669300 |
| F | -1.98084300 | -1.76084400 | -0.46680200 |
| C | 1.59123900  | -2.41662100 | 0.24750900  |
| C | 2.56602700  | -1.71482300 | -0.51964800 |
| C | 3.85122900  | -1.44584900 | 0.01148200  |
| C | 4.76849900  | -0.75075400 | -0.75651700 |
| C | 4.40274900  | -0.33896300 | -2.04056700 |
| C | 3.11291400  | -0.64237400 | -2.48597100 |
| N | 2.21223200  | -1.29678400 | -1.76212600 |
| C | -1.25209800 | -1.88152300 | 1.71864000  |
| F | -1.95816900 | -3.02263700 | 1.75256600  |
| F | -2.02908500 | -0.91338300 | 2.21651900  |
| F | -0.20679700 | -2.04468600 | 2.53677800  |
| H | 3.43831300  | 3.28729600  | -0.70377900 |
| H | 2.17777700  | 1.15741800  | -0.83189400 |
| H | 0.31347400  | 2.02002600  | 2.93047700  |
| H | 1.53334200  | 4.18950700  | 3.04172100  |
| H | 3.10927400  | 4.81837500  | 1.22637000  |
| H | -2.25084400 | 1.70031100  | 0.78617400  |
| H | -4.68981900 | 2.05028100  | 1.04624700  |
| H | -6.23315800 | 1.50924300  | -0.82322700 |
| H | -5.32736100 | 0.58617000  | -2.94331200 |
| H | -2.89275800 | 0.16745300  | -3.17586800 |

|   |             |             |             |
|---|-------------|-------------|-------------|
| H | 0.17924400  | -2.52397700 | -1.33557400 |
| H | -0.18148200 | -3.61097700 | 0.02868700  |
| H | 1.86082900  | -2.75146100 | 1.24252800  |
| H | 4.09433000  | -1.77732000 | 1.01598300  |
| H | 5.75541900  | -0.52673900 | -0.36396900 |
| H | 5.08976300  | 0.20356500  | -2.68008900 |
| H | 2.78776900  | -0.32959900 | -3.47624200 |

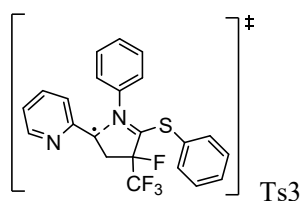

|   |             |             |             |
|---|-------------|-------------|-------------|
| C | 2.56957600  | 3.21190100  | -0.34346200 |
| C | 1.91829800  | 1.98030500  | -0.45792000 |
| C | 1.27000000  | 1.42805600  | 0.65740200  |
| C | 1.29918600  | 2.10332100  | 1.88767400  |
| C | 1.93997100  | 3.33970500  | 1.99007000  |
| C | 2.57789500  | 3.89696300  | 0.87566900  |
| N | 0.62960500  | 0.16499600  | 0.61716200  |
| C | -0.44222100 | -0.13918800 | -0.07293900 |
| C | -0.74540200 | -1.61782100 | 0.09419900  |
| S | -1.12262400 | 0.82703900  | -1.42519900 |
| C | -2.88064000 | 0.90596600  | -1.02634700 |
| C | -3.32326600 | 1.58301700  | 0.11900100  |
| C | -4.69305300 | 1.70325800  | 0.36555200  |
| C | -5.62153800 | 1.16895800  | -0.53547800 |
| C | -5.17653400 | 0.50719700  | -1.68365000 |
| C | -3.80624800 | 0.36896300  | -1.93010000 |
| C | 0.62642300  | -2.34765100 | 0.01467800  |
| F | -1.58692200 | -2.09804200 | -0.91525200 |
| C | 1.72349200  | -1.50564000 | 0.59941600  |
| C | 2.94567600  | -1.26591300 | -0.14875500 |
| C | 4.12520400  | -0.87888900 | 0.53061100  |
| C | 5.28369700  | -0.63326700 | -0.19676300 |
| C | 5.25046500  | -0.77077100 | -1.58947900 |
| C | 4.04267900  | -1.15188200 | -2.18461100 |
| N | 2.91877700  | -1.39418000 | -1.50255500 |
| C | -1.51406900 | -1.95084900 | 1.39513600  |
| F | -1.77860300 | -3.27835700 | 1.47515800  |
| F | -2.70296200 | -1.31244700 | 1.46322300  |
| F | -0.80999500 | -1.61706400 | 2.49817600  |
| H | 3.06981800  | 3.63427700  | -1.21041200 |
| H | 1.92280600  | 1.44570900  | -1.40182000 |

|   |             |             |             |
|---|-------------|-------------|-------------|
| H | 0.81055500  | 1.65755200  | 2.74902200  |
| H | 1.94618000  | 3.86364300  | 2.94165200  |
| H | 3.08289000  | 4.85502200  | 0.95923200  |
| H | -2.60487400 | 2.01131700  | 0.81134000  |
| H | -5.03339800 | 2.22358400  | 1.25650900  |
| H | -6.68591800 | 1.27090200  | -0.34371700 |
| H | -5.89196100 | 0.08994800  | -2.38667100 |
| H | -3.46164800 | -0.15590800 | -2.81589400 |
| H | 0.80615400  | -2.51027200 | -1.05054600 |
| H | 0.56718900  | -3.32167500 | 0.50908300  |
| H | 1.85986500  | -1.56555500 | 1.67414500  |
| H | 4.11473000  | -0.78623700 | 1.61253700  |
| H | 6.19917500  | -0.34206100 | 0.31046200  |
| H | 6.12958700  | -0.59144000 | -2.19995500 |
| H | 3.98094000  | -1.26837900 | -3.26521400 |

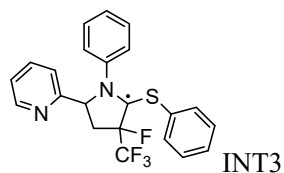

|   |             |             |             |
|---|-------------|-------------|-------------|
| C | 0.21936600  | -3.62049900 | 0.76244200  |
| C | 0.59272100  | -2.29621300 | 0.99513800  |
| C | 0.25455500  | -1.31729900 | 0.06674200  |
| C | -0.44109200 | -1.64864100 | -1.09799700 |
| C | -0.80921700 | -2.97029500 | -1.32676700 |
| C | -0.48060900 | -3.95661200 | -0.39447600 |
| N | 0.62646100  | 0.04260900  | 0.31514800  |
| C | -0.32592600 | 0.99687100  | 0.65031300  |
| C | 0.23665200  | 2.36024700  | 0.40189700  |
| S | -1.63076700 | 0.68629600  | 1.76273400  |
| C | -2.71491400 | -0.33710000 | 0.75587000  |
| C | -3.03036300 | -1.62134300 | 1.19756700  |
| C | -3.86290500 | -2.43347300 | 0.42769400  |
| C | -4.37135700 | -1.96719500 | -0.78264900 |
| C | -4.05790900 | -0.67811100 | -1.21748600 |
| C | -3.23834700 | 0.14250900  | -0.44692900 |
| C | 1.67655600  | 2.09907200  | -0.05118000 |
| F | 0.21263700  | 3.16661700  | 1.53543700  |
| C | 1.67538000  | 0.64446200  | -0.52465200 |
| C | 2.98665600  | -0.09088500 | -0.34144700 |
| C | 3.42717400  | -0.99435800 | -1.30884800 |
| C | 4.60939200  | -1.69404100 | -1.08320500 |
| C | 5.30498500  | -1.46316800 | 0.09811200  |

|   |             |             |             |
|---|-------------|-------------|-------------|
| C | 4.78172500  | -0.53881200 | 1.00294100  |
| N | 3.65017000  | 0.13367300  | 0.79607300  |
| C | -0.55857500 | 3.14998100  | -0.64134800 |
| F | -0.02682900 | 4.36283300  | -0.85045200 |
| F | -1.83634700 | 3.32261400  | -0.29160800 |
| F | -0.54161800 | 2.49891300  | -1.82300800 |
| H | 0.47458400  | -4.38737900 | 1.48692300  |
| H | 1.13300200  | -2.00375600 | 1.89018800  |
| H | -0.71807600 | -0.86199200 | -1.79576000 |
| H | -1.36825300 | -3.22782400 | -2.22086100 |
| H | -0.77552100 | -4.98649900 | -0.56995000 |
| H | -2.59974600 | -1.99044100 | 2.12377600  |
| H | -4.09640000 | -3.43788900 | 0.76754000  |
| H | -5.01210200 | -2.60339700 | -1.38535600 |
| H | -4.46098400 | -0.30643700 | -2.15475500 |
| H | -2.99239100 | 1.14768000  | -0.77619400 |
| H | 2.30942000  | 2.18385400  | 0.83557900  |
| H | 2.02346100  | 2.79520800  | -0.81665800 |
| H | 1.37576500  | 0.58227700  | -1.58214600 |
| H | 2.84389100  | -1.15038400 | -2.21122700 |
| H | 4.97676200  | -2.40669400 | -1.81485900 |
| H | 6.23091500  | -1.98181800 | 0.32086700  |
| H | 5.29725100  | -0.32858900 | 1.93688200  |

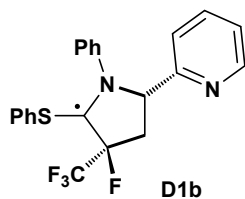

|   |             |             |             |
|---|-------------|-------------|-------------|
| C | 0.27893600  | -0.52107700 | 0.07950200  |
| C | -0.30137700 | -1.77159200 | -0.12110200 |
| C | -1.68819600 | -1.92477500 | 0.01128000  |
| C | -2.48166200 | -0.82148200 | 0.35251500  |
| C | -1.89023700 | 0.42447400  | 0.53996000  |
| C | -0.50965700 | 0.58262100  | 0.40536000  |
| N | -2.26968400 | -3.19591000 | -0.16188400 |
| C | -3.48129400 | -3.45805600 | -0.78034300 |
| C | -3.66502900 | -4.93990200 | -0.83339400 |
| S | -4.14094100 | -2.40509100 | -2.01319400 |
| C | -5.63169800 | -1.73754500 | -1.27617100 |
| C | -5.97459000 | -1.90261500 | 0.06685700  |
| C | -7.15628400 | -1.33990900 | 0.55158200  |
| C | -7.99352600 | -0.61105200 | -0.29208500 |
| C | -7.64277200 | -0.44646600 | -1.63336700 |
| C | -6.46853600 | -1.00894800 | -2.12890300 |



|   |             |             |             |
|---|-------------|-------------|-------------|
| C | -2.65490500 | -5.49032000 | 0.16178000  |
| F | -3.38338800 | -5.43618600 | -2.12504300 |
| C | -1.54162200 | -4.43124400 | 0.18464000  |
| C | -5.08526400 | -5.43773300 | -0.56832800 |
| F | -5.13618000 | -6.77956600 | -0.63503300 |
| F | -5.96581700 | -4.96400800 | -1.45967300 |
| F | -5.51185000 | -5.08304500 | 0.65221100  |
| H | 1.35395300  | -0.41202700 | -0.02704100 |
| H | 0.32078500  | -2.62066600 | -0.38729700 |
| H | -3.55070400 | -0.94358600 | 0.49192800  |
| H | -2.51346200 | 1.27280500  | 0.80629200  |
| H | -0.05282500 | 1.55509100  | 0.55946800  |
| H | -5.32645400 | -2.46652900 | 0.73215300  |
| H | -7.41739800 | -1.47422200 | 1.59726200  |
| H | -8.91120400 | -0.17557500 | 0.09058600  |
| H | -8.28650500 | 0.11794800  | -2.30146500 |
| H | -6.20673800 | -0.88365500 | -3.17677200 |
| H | -2.29643600 | -6.47520900 | -0.13940100 |
| H | -3.11868300 | -5.56180900 | 1.15003600  |
| H | -0.79101500 | -4.64501600 | -0.58551000 |
| C | -0.84659900 | -4.34310900 | 1.52660800  |
| C | -1.50271500 | -3.80821100 | 2.63820400  |
| C | -0.82854600 | -3.76997400 | 3.85288100  |
| H | -2.51660300 | -3.42751400 | 2.54244300  |
| C | 1.03508500  | -4.79251900 | 2.75470000  |
| C | 0.47010100  | -4.27359600 | 3.91569300  |
| H | -1.30616000 | -3.35482400 | 4.73504100  |
| H | 2.04484400  | -5.19456600 | 2.76445600  |
| H | 1.03635400  | -4.26404900 | 4.84068300  |
| N | 0.39783800  | -4.82493700 | 1.57667100  |

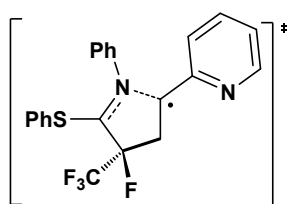

TS3b

|   |             |             |            |
|---|-------------|-------------|------------|
| C | 0.38771100  | -1.01424400 | 0.27809200 |
| C | -0.50893900 | -2.06192400 | 0.07585300 |
| C | -1.33236900 | -2.47844800 | 1.12698200 |
| C | -1.23930900 | -1.86945600 | 2.38155500 |
| C | -0.35172800 | -0.81192500 | 2.57034900 |
| C | 0.46352600  | -0.38355400 | 1.52096800 |

|   |             |             |             |
|---|-------------|-------------|-------------|
| N | -2.19904900 | -3.58653800 | 0.99409700  |
| C | -3.16717800 | -3.68906900 | 0.14012700  |
| C | -3.73150300 | -5.09537100 | 0.17428200  |
| S | -3.50107100 | -2.57321100 | -1.20754400 |
| C | -5.28066300 | -2.41112400 | -1.06530100 |
| C | -5.82021200 | -1.66457600 | -0.01436000 |
| C | -7.20152200 | -1.50800400 | 0.07916800  |
| C | -8.03768900 | -2.08252300 | -0.88019200 |
| C | -7.49218200 | -2.81408500 | -1.93518000 |
| C | -6.11026700 | -2.98275600 | -2.03073900 |
| C | -2.53005000 | -6.08559600 | 0.36753900  |
| F | -4.41052400 | -5.39854100 | -0.99126800 |
| C | -1.27084100 | -5.37198000 | 0.75920000  |
| C | -4.78545500 | -5.28605700 | 1.27274400  |
| F | -5.21817100 | -6.55881400 | 1.30007800  |
| F | -5.86196600 | -4.51531500 | 1.07118800  |
| F | -4.29550800 | -4.99764000 | 2.48373900  |
| H | 1.02997600  | -0.69399700 | -0.53664800 |
| H | -0.55451000 | -2.57283700 | -0.88239200 |
| H | -1.86649700 | -2.22915500 | 3.19243000  |
| H | -0.28841500 | -0.33076500 | 3.54152700  |
| H | 1.16311300  | 0.43239800  | 1.67391900  |
| H | -5.16341300 | -1.21766300 | 0.72711900  |
| H | -7.62331900 | -0.93351700 | 0.89828400  |
| H | -9.11363400 | -1.95617900 | -0.80689500 |
| H | -8.14038200 | -3.25996500 | -2.68340200 |
| H | -5.68084500 | -3.56147400 | -2.84296900 |
| H | -2.40423100 | -6.56454600 | -0.60709900 |
| H | -2.80169200 | -6.86543400 | 1.08225000  |
| H | -0.62372800 | -5.05208300 | -0.05370400 |
| C | -0.57880300 | -5.56311100 | 2.01865500  |
| C | -1.20456400 | -6.08812400 | 3.16563700  |
| C | -0.49218300 | -6.14960200 | 4.35592700  |
| H | -2.22975100 | -6.43966400 | 3.12228400  |
| C | 1.36387200  | -5.17674500 | 3.20459300  |
| C | 0.82279700  | -5.68623300 | 4.38580900  |
| H | -0.95779400 | -6.55234400 | 5.25053400  |
| H | 2.38608900  | -4.80525500 | 3.18748400  |
| H | 1.41641300  | -5.71483500 | 5.29290600  |
| N | 0.69640800  | -5.10789700 | 2.05293000  |

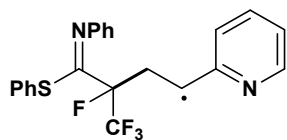

C1

|   |             |             |             |
|---|-------------|-------------|-------------|
| C | 0.59417000  | -1.81708700 | 0.02316700  |
| C | 0.84995400  | -2.67086500 | 1.09502400  |
| C | 0.83553700  | -2.16503000 | 2.39858800  |
| C | 0.59267200  | -0.80718500 | 2.62763500  |
| C | 0.31667100  | 0.03226200  | 1.55080600  |
| C | 0.31885200  | -0.46777600 | 0.24691700  |
| N | 1.14364600  | -2.98682700 | 3.50330400  |
| C | 0.46485000  | -4.00140600 | 3.83159000  |
| C | 1.04994300  | -4.85378800 | 4.96681100  |
| S | -0.99596800 | -4.59877900 | 2.96529700  |
| C | -2.17293800 | -4.68347800 | 4.31227500  |
| C | -2.42319600 | -3.55644900 | 5.09804700  |
| C | -3.37757600 | -3.62623400 | 6.11246100  |
| C | -4.09664700 | -4.80371000 | 6.32022200  |
| C | -3.85663900 | -5.91815200 | 5.51509100  |
| C | -2.88855400 | -5.86554100 | 4.51324600  |
| C | 2.26923600  | -5.63228200 | 4.44283800  |
| F | 0.11453800  | -5.75960400 | 5.42741000  |
| C | 2.83651900  | -6.58668300 | 5.43816000  |
| C | 4.13002700  | -6.50403500 | 6.02658700  |
| C | 5.63944600  | -7.49481700 | 7.47444600  |
| C | 6.60116100  | -6.50116800 | 7.26016100  |
| C | 6.28626500  | -5.46526300 | 6.38078700  |
| C | 1.38258000  | -3.98028900 | 6.19430800  |
| F | 1.54963900  | -4.74456400 | 7.28342500  |
| F | 0.39143300  | -3.11863300 | 6.46941600  |
| F | 2.50399600  | -3.27343400 | 6.02361800  |
| H | 0.60873700  | -2.21092600 | -0.98858200 |
| H | 1.07919500  | -3.71990900 | 0.92632000  |
| H | 0.60953500  | -0.42737200 | 3.64500300  |
| H | 0.10933200  | 1.08269100  | 1.73135000  |
| H | 0.11540300  | 0.19276900  | -0.59011400 |
| H | -1.87700200 | -2.63343600 | 4.92104400  |
| H | -3.56540100 | -2.75423200 | 6.73156400  |
| H | -4.84433000 | -4.85221800 | 7.10595000  |
| H | -4.41461900 | -6.83613700 | 5.67261900  |
| H | -2.68302300 | -6.73902500 | 3.90144100  |
| H | 2.99861300  | -4.90593900 | 4.07975900  |
| H | 1.90109500  | -6.19043400 | 3.57116700  |

|   |            |             |            |
|---|------------|-------------|------------|
| H | 2.21937000 | -7.42565300 | 5.74367700 |
| H | 5.85089800 | -8.31683000 | 8.15505600 |
| H | 7.55725300 | -6.54607100 | 7.76960400 |
| H | 6.99879500 | -4.66978000 | 6.18464400 |
| C | 5.04793700 | -5.45863600 | 5.75734900 |
| H | 4.78831000 | -4.65709000 | 5.07498900 |
| N | 4.44704100 | -7.51194200 | 6.89096300 |

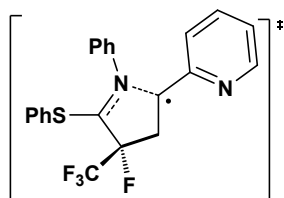

**TS3a**

|   |             |             |             |
|---|-------------|-------------|-------------|
| C | 2.96383900  | 2.77963100  | -0.28158600 |
| C | 2.07770000  | 1.70982300  | -0.39642000 |
| C | 1.46547700  | 1.19162100  | 0.75042900  |
| C | 1.76352100  | 1.72555000  | 2.00793200  |
| C | 2.64010200  | 2.80317100  | 2.11331200  |
| C | 3.24215900  | 3.33159400  | 0.96958400  |
| N | 0.61729300  | 0.06086400  | 0.71031600  |
| C | -0.41834600 | -0.08959100 | -0.05903300 |
| C | -0.93283400 | -1.50686400 | 0.06357800  |
| S | -0.93972600 | 0.97292400  | -1.38674400 |
| C | -2.68695400 | 1.10830600  | -1.00487000 |
| C | -3.09482400 | 1.82572000  | 0.12288000  |
| C | -4.45419200 | 1.96347800  | 0.39576700  |
| C | -5.40140600 | 1.40047900  | -0.46193300 |
| C | -4.98858800 | 0.69662600  | -1.59318500 |
| C | -3.62865400 | 0.54508700  | -1.86716600 |
| C | 0.32050800  | -2.42383900 | 0.01473100  |
| F | -1.80493400 | -1.83555000 | -0.95504300 |
| C | 1.50963600  | -1.73313000 | 0.60930700  |
| C | 2.67565900  | -1.44843300 | -0.20030000 |
| C | 3.90067000  | -1.11674400 | 0.41743000  |
| C | 4.97650600  | -0.74298300 | -0.37184300 |
| C | 4.81543100  | -0.70540800 | -1.75993000 |
| C | 3.57165100  | -1.05367200 | -2.28671400 |
| N | 2.52294100  | -1.41252500 | -1.54398300 |
| C | -1.74500600 | -1.74243400 | 1.34391200  |
| F | -2.22628000 | -2.99672800 | 1.37255500  |
| F | -2.79716300 | -0.91751900 | 1.43142200  |
| F | -0.99761900 | -1.57311200 | 2.44156900  |
| H | 3.44175900  | 3.17619000  | -1.17234800 |

|   |             |             |             |
|---|-------------|-------------|-------------|
| H | 1.88721800  | 1.25934600  | -1.36614900 |
| H | 1.30065700  | 1.29056400  | 2.88917600  |
| H | 2.85999100  | 3.22391900  | 3.08970000  |
| H | 3.93344800  | 4.16447300  | 1.05442000  |
| H | -2.35280600 | 2.26455000  | 0.78477400  |
| H | -4.77252600 | 2.51529800  | 1.27504000  |
| H | -6.46022300 | 1.51258500  | -0.24898100 |
| H | -5.72272900 | 0.25764100  | -2.26188900 |
| H | -3.30148200 | -0.01452300 | -2.73839700 |
| H | 0.48952900  | -2.62208000 | -1.04630700 |
| H | 0.11131700  | -3.36907200 | 0.52320300  |
| H | 1.69349600  | -1.87240800 | 1.67029500  |
| H | 3.98089400  | -1.15403800 | 1.50001700  |
| H | 5.92754000  | -0.48203900 | 0.08302900  |
| H | 5.62773200  | -0.41924900 | -2.41900400 |
| H | 3.41179400  | -1.03805800 | -3.36281400 |

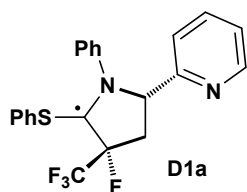

|   |             |             |             |
|---|-------------|-------------|-------------|
| C | 0.01726100  | -3.54869000 | 1.16097500  |
| C | 0.39553800  | -2.21018300 | 1.27566800  |
| C | 0.25939100  | -1.36245000 | 0.17808100  |
| C | -0.23096500 | -1.84273100 | -1.03860400 |
| C | -0.60149800 | -3.18141500 | -1.14841400 |
| C | -0.48261300 | -4.03371300 | -0.04772600 |
| N | 0.60906300  | 0.01673000  | 0.31632600  |
| C | -0.31357800 | 0.97775300  | 0.70221700  |
| C | 0.26251500  | 2.33156600  | 0.47782500  |
| S | -1.66360500 | 0.64562000  | 1.74815600  |
| C | -2.72208700 | -0.34769300 | 0.68008300  |
| C | -3.17609600 | -1.57877400 | 1.15518600  |
| C | -3.99696800 | -2.37062300 | 0.34933800  |
| C | -4.35485500 | -1.93776200 | -0.92691100 |
| C | -3.90102700 | -0.70178000 | -1.39415100 |
| C | -3.09103800 | 0.09883300  | -0.59132000 |
| C | 1.66178300  | 2.06527900  | -0.08438700 |
| F | 0.34195200  | 3.08355000  | 1.66789800  |
| C | 1.61869500  | 0.61216800  | -0.57359200 |
| C | 2.93854200  | -0.12021500 | -0.46409700 |
| C | 3.51150400  | -0.72030500 | -1.58360700 |
| C | 4.72256300  | -1.39509600 | -1.43488000 |
| C | 5.30714000  | -1.44810800 | -0.17448300 |

|   |             |             |             |
|---|-------------|-------------|-------------|
| C | 4.65334100  | -0.81911400 | 0.88633700  |
| N | 3.49650000  | -0.16718700 | 0.75203100  |
| C | -0.57532900 | 3.22492300  | -0.43905100 |
| F | -0.01841300 | 4.44004900  | -0.58130100 |
| F | -1.81923100 | 3.41597300  | 0.02192600  |
| F | -0.67283900 | 2.68581900  | -1.66555800 |
| H | 0.11484100  | -4.21062700 | 2.01603600  |
| H | 0.78665600  | -1.81361600 | 2.20805500  |
| H | -0.33889000 | -1.16505400 | -1.88172100 |
| H | -0.99233100 | -3.55639500 | -2.08966700 |
| H | -0.77886100 | -5.07481600 | -0.13408100 |
| H | -2.87384400 | -1.92660600 | 2.13935700  |
| H | -4.34118100 | -3.33285900 | 0.71703200  |
| H | -4.98409400 | -2.55952300 | -1.55651600 |
| H | -4.18170200 | -0.35692600 | -2.38503500 |
| H | -2.73626500 | 1.05839800  | -0.95636400 |
| H | 2.35759300  | 2.14674500  | 0.75524700  |
| H | 1.95824600  | 2.76295100  | -0.86898500 |
| H | 1.26832300  | 0.56783300  | -1.61348300 |
| H | 3.01272600  | -0.65992500 | -2.54608800 |
| H | 5.19506200  | -1.87301500 | -2.28753300 |
| H | 6.24669400  | -1.96335400 | -0.00610700 |
| H | 5.08061600  | -0.84106200 | 1.88593200  |

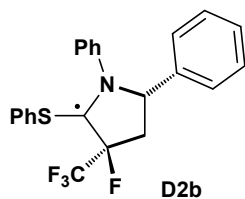

|   |             |             |             |
|---|-------------|-------------|-------------|
| C | -0.16790500 | -1.03882200 | 0.00106800  |
| C | 0.14856900  | 0.31622500  | 0.06682900  |
| C | -0.76635100 | 1.21859000  | 0.62505600  |
| C | -1.99734700 | 0.75468800  | 1.10676500  |
| C | -2.29749400 | -0.60318400 | 1.04455100  |
| C | -1.38735300 | -1.50629800 | 0.49219900  |
| N | -0.45427800 | 2.59121700  | 0.66897000  |
| C | -0.72839600 | 3.44903700  | 1.72063100  |
| C | -0.14026300 | 4.78349100  | 1.40043100  |
| S | -0.88835600 | 2.88124000  | 3.36783100  |
| C | 0.14094400  | 4.73256700  | -0.09342200 |
| F | 1.06486100  | 4.98876300  | 2.10943100  |
| C | 0.34893500  | 3.23860300  | -0.39056500 |
| C | -0.99159500 | 5.98835700  | 1.79746600  |
| F | -0.38537900 | 7.13524900  | 1.44363800  |
| F | -1.20876700 | 6.04782200  | 3.11810500  |

|   |             |             |             |
|---|-------------|-------------|-------------|
| F | -2.18686200 | 5.96581300  | 1.18985700  |
| H | 0.54812100  | -1.73111700 | -0.43132600 |
| H | 1.10547800  | 0.66976200  | -0.30433100 |
| H | -2.72139200 | 1.45649200  | 1.50770200  |
| H | -3.25499800 | -0.95300700 | 1.41852700  |
| H | -1.62902500 | -2.56321300 | 0.43999300  |
| H | 1.00859500  | 5.34007600  | -0.35380000 |
| H | -0.73167800 | 5.10038800  | -0.64115800 |
| C | -2.61210000 | 3.16227700  | 3.77037400  |
| C | -3.57159600 | 3.55817700  | 2.83703200  |
| C | -2.97686900 | 2.95486100  | 5.10543300  |
| C | -4.89320700 | 3.74807100  | 3.24354200  |
| H | -3.29219300 | 3.71928500  | 1.79951800  |
| C | -4.29998900 | 3.14188500  | 5.49950800  |
| H | -2.23060100 | 2.65105400  | 5.83557200  |
| C | -5.26380400 | 3.54131900  | 4.57164200  |
| H | -5.63352400 | 4.05816400  | 2.51178400  |
| H | -4.57511800 | 2.97855000  | 6.53726900  |
| H | -6.29322900 | 3.69018500  | 4.88213600  |
| C | -0.09570500 | 2.84588700  | -1.78141700 |
| C | 0.84775900  | 2.49753800  | -2.74769500 |
| C | -1.45448500 | 2.85163200  | -2.11532200 |
| C | 0.44102900  | 2.16321400  | -4.04132700 |
| H | 1.90301000  | 2.48154300  | -2.48532200 |
| C | -1.86225600 | 2.51084400  | -3.40245400 |
| H | -2.19322200 | 3.11706900  | -1.36062700 |
| C | -0.91360700 | 2.16680600  | -4.36946200 |
| H | 1.18257900  | 1.89322600  | -4.78723200 |
| H | -2.91900700 | 2.51173800  | -3.65242400 |
| H | -1.23193400 | 1.90004700  | -5.37278900 |
| H | 1.40404800  | 2.97049100  | -0.25082000 |

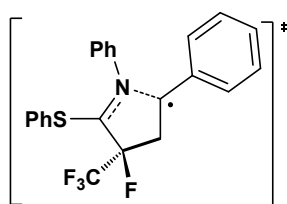

TS3d

|   |             |             |            |
|---|-------------|-------------|------------|
| C | 0.59976400  | -0.48845900 | 0.25085800 |
| C | -0.29847500 | -1.53711500 | 0.06004800 |
| C | -1.11329000 | -1.95228400 | 1.11939500 |
| C | -1.00686600 | -1.33855900 | 2.37120600 |
| C | -0.11868400 | -0.27951100 | 2.54875000 |
| C | 0.68650000  | 0.14666400  | 1.49083500 |

|   |             |             |             |
|---|-------------|-------------|-------------|
| N | -1.97520100 | -3.06359800 | 1.00063200  |
| C | -2.93491400 | -3.18609700 | 0.13865300  |
| C | -3.47858100 | -4.59925800 | 0.18005700  |
| S | -3.27587400 | -2.09445300 | -1.22880200 |
| C | -5.05365800 | -1.92806400 | -1.06750000 |
| C | -5.58236900 | -1.18753200 | -0.00666200 |
| C | -6.96245200 | -1.03046000 | 0.10215300  |
| C | -7.80922200 | -1.59847600 | -0.85191700 |
| C | -7.27507800 | -2.32458000 | -1.91633900 |
| C | -5.89420700 | -2.49410900 | -2.02673400 |
| C | -2.26232800 | -5.57535600 | 0.35738900  |
| F | -4.16877500 | -4.91446300 | -0.97665400 |
| C | -1.01306500 | -4.85703000 | 0.77352900  |
| C | -4.51767800 | -4.80316700 | 1.28994100  |
| F | -4.93699100 | -6.08083000 | 1.32037700  |
| F | -5.60530800 | -4.04406800 | 1.09978700  |
| F | -4.02049200 | -4.51122000 | 2.49675800  |
| H | 1.23458600  | -0.17059400 | -0.57070200 |
| H | -0.35180600 | -2.05060500 | -0.89649200 |
| H | -1.62506500 | -1.69705000 | 3.18950400  |
| H | -0.04630600 | 0.20388800  | 3.51821300  |
| H | 1.38694400  | 0.96350700  | 1.63491300  |
| H | -4.91777100 | -0.74554200 | 0.73090900  |
| H | -7.37523500 | -0.46052000 | 0.92904200  |
| H | -8.88425400 | -1.47177100 | -0.76668600 |
| H | -7.93127800 | -2.76621200 | -2.66012800 |
| H | -5.47381600 | -3.06995700 | -2.84579000 |
| H | -2.12703000 | -6.02812100 | -0.62864200 |
| H | -2.52828400 | -6.37566200 | 1.05133500  |
| H | -0.37772200 | -4.51010400 | -0.03875400 |
| C | -0.33146200 | -5.06276500 | 2.03433900  |
| C | -0.95426200 | -5.63884600 | 3.16073500  |
| C | -0.27709200 | -5.73687800 | 4.37283300  |
| H | -1.97055800 | -6.01455700 | 3.08893600  |
| C | 1.65791900  | -4.67616900 | 3.39261700  |
| C | 1.02991900  | -5.25817000 | 4.49750400  |
| H | -0.77258200 | -6.18840400 | 5.22753300  |
| H | 2.67302900  | -4.29951400 | 3.47877700  |
| H | 1.55311900  | -5.33802000 | 5.44548200  |
| C | 0.98614500  | -4.57751600 | 2.17907100  |
| H | 1.47622500  | -4.12261100 | 1.32091200  |



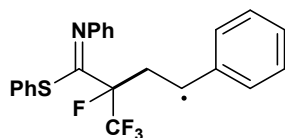

C2

|   |             |             |             |
|---|-------------|-------------|-------------|
| C | 0.30217800  | -2.11639400 | 0.03090500  |
| C | 0.54632600  | -2.97908300 | 1.09831900  |
| C | 0.52886500  | -2.48200600 | 2.40526400  |
| C | 0.29445800  | -1.12399100 | 2.64206700  |
| C | 0.03016000  | -0.27537100 | 1.56947900  |
| C | 0.03547700  | -0.76663300 | 0.26226900  |
| N | 0.82587000  | -3.31371800 | 3.50543400  |
| C | 0.13823900  | -4.32572400 | 3.82354900  |
| C | 0.71363300  | -5.19300900 | 4.95197100  |
| S | -1.32570600 | -4.90401900 | 2.94883200  |
| C | -2.50630300 | -4.98008100 | 4.29320500  |
| C | -2.73827000 | -3.85600100 | 5.08886800  |
| C | -3.69445400 | -3.91850100 | 6.10203100  |
| C | -4.43368900 | -5.08530100 | 6.29894200  |
| C | -4.21211700 | -6.19631200 | 5.48387800  |
| C | -3.24226900 | -6.15141900 | 4.48331500  |
| C | 1.92290400  | -5.98284100 | 4.42098400  |
| F | -0.23317600 | -6.09104300 | 5.40658900  |
| C | 2.50003300  | -6.93420400 | 5.41567100  |
| C | 3.78925000  | -6.83469200 | 6.00663100  |
| C | 4.20308000  | -7.83834900 | 6.92527200  |
| C | 5.44989300  | -7.79190500 | 7.52889800  |
| C | 6.33507400  | -6.74472100 | 7.24368900  |
| C | 5.94911200  | -5.74499000 | 6.34432600  |
| C | 1.05804000  | -4.33219500 | 6.18526500  |
| F | 1.19524400  | -5.10189800 | 7.27454200  |
| F | 0.08897600  | -3.44358300 | 6.45595600  |
| F | 2.19982500  | -3.65581500 | 6.02483500  |
| H | 0.31919200  | -2.50359900 | -0.98336600 |
| H | 0.76913900  | -4.02857400 | 0.92385800  |
| H | 0.30882400  | -0.75106000 | 3.66201500  |
| H | -0.17046900 | 0.77532000  | 1.75601000  |
| H | -0.15875500 | -0.09898100 | -0.57130400 |
| H | -2.17666600 | -2.94065800 | 4.92055900  |
| H | -3.86776400 | -3.04890200 | 6.72871200  |
| H | -5.18268600 | -5.12802700 | 7.08375400  |
| H | -4.78593000 | -7.10595900 | 5.63268400  |
| H | -3.05138400 | -7.02293000 | 3.86398800  |
| H | 2.65248600  | -5.26126100 | 4.04822400  |

S45

|   |            |             |            |
|---|------------|-------------|------------|
| H | 1.54115400 | -6.53879400 | 3.55380900 |
| H | 1.87870800 | -7.77526900 | 5.71030200 |
| H | 3.51921200 | -8.65318400 | 7.14928300 |
| H | 5.73923000 | -8.57286800 | 8.22611500 |
| H | 7.31145800 | -6.70845100 | 7.71655600 |
| H | 6.62896900 | -4.92825400 | 6.11945000 |
| C | 4.70233500 | -5.78102200 | 5.73402400 |
| H | 4.43090900 | -4.98767000 | 5.04491800 |

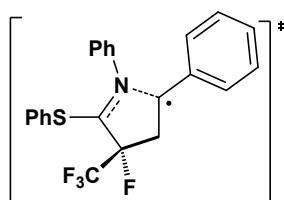

**TS3c**

|   |             |             |             |
|---|-------------|-------------|-------------|
| C | -0.78891500 | -1.04609400 | 0.04456400  |
| C | -1.69879400 | -2.09717000 | -0.05917200 |
| C | -2.27155900 | -2.63706900 | 1.09886700  |
| C | -1.90793400 | -2.13890300 | 2.35488400  |
| C | -1.00899900 | -1.07932700 | 2.45047600  |
| C | -0.44651600 | -0.53152100 | 1.29564600  |
| N | -3.13077700 | -3.75653500 | 1.07694300  |
| C | -4.17023600 | -3.92063400 | 0.31326300  |
| C | -4.67758700 | -5.33707400 | 0.46240100  |
| S | -4.70154600 | -2.89260400 | -1.03961300 |
| C | -6.44278600 | -2.73482000 | -0.63985900 |
| C | -6.83245300 | -2.01067600 | 0.49013600  |
| C | -8.18756200 | -1.85710800 | 0.77537800  |
| C | -9.14936500 | -2.41098700 | -0.07215700 |
| C | -8.75493500 | -3.12200100 | -1.20537400 |
| C | -7.39923900 | -3.28965700 | -1.49130100 |
| C | -3.42620900 | -6.26265100 | 0.40636300  |
| F | -5.56767200 | -5.68269200 | -0.53581200 |
| C | -2.21518000 | -5.57019800 | 0.95583900  |
| C | -1.04655600 | -5.29076600 | 0.15117400  |
| C | 0.16223800  | -4.94749400 | 0.79931300  |
| C | 1.28171200  | -4.56293000 | 0.07278100  |
| C | 1.22930500  | -4.50662500 | -1.32466800 |
| C | 0.04309300  | -4.84269200 | -1.98160200 |
| C | -5.46811000 | -5.55774300 | 1.75931400  |
| F | -5.95323600 | -6.81045600 | 1.80809500  |
| F | -6.51662000 | -4.72900000 | 1.85606200  |
| F | -4.70344700 | -5.38127600 | 2.84366400  |
| H | -0.34176400 | -0.63551700 | -0.85583900 |

|   |              |             |             |
|---|--------------|-------------|-------------|
| H | -1.93472600  | -2.51735500 | -1.03153600 |
| H | -2.33862700  | -2.59026400 | 3.24427800  |
| H | -0.73936500  | -0.68889800 | 3.42700800  |
| H | 0.26333600   | 0.28654600  | 1.37137200  |
| H | -6.07947000  | -1.57887400 | 1.14427500  |
| H | -8.49136200  | -1.29978600 | 1.65636200  |
| H | -10.20478900 | -2.28635200 | 0.15043100  |
| H | -9.50010900  | -3.55448900 | -1.86610200 |
| H | -7.08660800  | -3.85527700 | -2.36407400 |
| H | -3.30986900  | -6.51829800 | -0.64918600 |
| H | -3.62799000  | -7.18878000 | 0.95226900  |
| H | -2.03111500  | -5.69442200 | 2.01944800  |
| H | 0.20341800   | -4.98289600 | 1.88560300  |
| H | 2.19900400   | -4.30370900 | 0.59375800  |
| H | 2.10380400   | -4.20608800 | -1.89360600 |
| H | -0.00704700  | -4.79916000 | -3.06586700 |
| C | -1.08297900  | -5.22769400 | -1.25917000 |
| H | -1.99680200  | -5.46485200 | -1.79662700 |

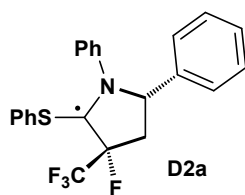

|   |             |             |             |
|---|-------------|-------------|-------------|
| C | 0.08578700  | -0.92396000 | 0.15227000  |
| C | 0.60105800  | 0.36913000  | 0.06583400  |
| C | 0.14322000  | 1.22792700  | -0.93505800 |
| C | -0.82995000 | 0.80278100  | -1.84295300 |
| C | -1.34722000 | -0.48757600 | -1.74506800 |
| C | -0.88977300 | -1.35249300 | -0.74889000 |
| N | 0.67440000  | 2.55269500  | -1.02568400 |
| C | -0.15722200 | 3.65099400  | -1.13697500 |
| C | 0.60528100  | 4.82135300  | -1.65643700 |
| S | -1.68197600 | 3.75649600  | -0.29996200 |
| C | 2.03064600  | 4.29726300  | -1.84760700 |
| F | 0.59479100  | 5.90871700  | -0.76842700 |
| C | 1.91267700  | 2.76663600  | -1.81193000 |
| C | 3.10410400  | 2.05846700  | -1.20973300 |
| C | 3.78054200  | 1.08230200  | -1.94170300 |
| C | 4.87120100  | 0.40912200  | -1.38507300 |
| C | 5.28495700  | 0.70622600  | -0.08829400 |
| C | 4.60830800  | 1.68119000  | 0.65108900  |
| C | 0.00189100  | 5.40581000  | -2.93461600 |
| F | 0.68237700  | 6.48262500  | -3.35887000 |
| F | -1.27290200 | 5.78686600  | -2.75770100 |

|   |             |             |             |
|---|-------------|-------------|-------------|
| F | 0.02071400  | 4.50147100  | -3.92658100 |
| H | 0.43929300  | -1.59098900 | 0.93263300  |
| H | 1.34187800  | 0.72205200  | 0.77747700  |
| H | -1.17563200 | 1.48751100  | -2.61351000 |
| H | -2.10595400 | -0.81800000 | -2.44801000 |
| H | -1.29500300 | -2.35702500 | -0.67390100 |
| H | 2.60657900  | 4.65814400  | -0.99131800 |
| H | 2.50904000  | 4.64923000  | -2.76350300 |
| H | 1.74148600  | 2.37943700  | -2.82595700 |
| H | 3.44983100  | 0.84435500  | -2.94988400 |
| H | 5.39051900  | -0.34890600 | -1.96380600 |
| H | 6.12966100  | 0.18189000  | 0.34849000  |
| H | 4.92488600  | 1.91357400  | 1.66360000  |
| C | 3.52540700  | 2.35396100  | 0.09235100  |
| H | 2.99382500  | 3.10374100  | 0.67521600  |
| C | -1.24391900 | 3.10167100  | 1.31545700  |
| C | -2.09754100 | 2.16703500  | 1.90400300  |
| C | -0.06986000 | 3.49553900  | 1.96341500  |
| C | -1.77752500 | 1.62995000  | 3.15201400  |
| H | -2.99704400 | 1.84801100  | 1.38394200  |
| C | 0.25274400  | 2.93863800  | 3.19904700  |
| H | 0.59038700  | 4.22327800  | 1.49801200  |
| C | -0.59973900 | 2.00661000  | 3.79679400  |
| H | -2.44267500 | 0.90338700  | 3.60907300  |
| H | 1.16975100  | 3.23746500  | 3.69868100  |
| H | -0.34443700 | 1.57609500  | 4.76023800  |

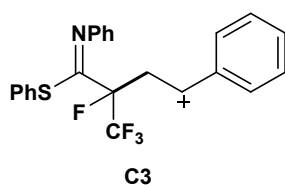

|   |             |             |             |
|---|-------------|-------------|-------------|
| C | 0.91567500  | -0.44080800 | -0.02094400 |
| C | 1.17314700  | -1.27948500 | 1.05838100  |
| C | 1.16224800  | -0.75776900 | 2.35242300  |
| C | 0.91863900  | 0.59986700  | 2.56446300  |
| C | 0.63933200  | 1.42322000  | 1.48084300  |
| C | 0.63915700  | 0.90725100  | 0.18661500  |
| N | 1.46278300  | -1.55998700 | 3.47267000  |
| C | 0.80519000  | -2.58440300 | 3.79572300  |
| C | 1.36787700  | -3.38018400 | 4.98267700  |
| S | -0.60336400 | -3.25412100 | 2.90324100  |
| C | -1.80007500 | -3.40110800 | 4.22864400  |
| C | -2.15007500 | -2.27916200 | 4.97601900  |
| C | -3.11594800 | -2.39636100 | 5.97069900  |

|   |             |             |             |
|---|-------------|-------------|-------------|
| C | -3.74749700 | -3.61656800 | 6.19224400  |
| C | -3.40730400 | -4.72733900 | 5.42407300  |
| C | -2.42571100 | -4.62720400 | 4.44427700  |
| C | 2.70812200  | -4.01654000 | 4.58778100  |
| F | 0.50434300  | -4.37429200 | 5.36968100  |
| C | 3.21000200  | -4.95936800 | 5.60589100  |
| C | 4.51122000  | -5.10148100 | 6.04734800  |
| C | 4.77067900  | -6.13944800 | 6.99499100  |
| C | 6.04237600  | -6.32558300 | 7.48171100  |
| C | 7.06930100  | -5.48520500 | 7.03868300  |
| C | 6.84170200  | -4.45660700 | 6.11098100  |
| C | 1.54042800  | -2.49524000 | 6.22917200  |
| F | 1.84116000  | -3.27376000 | 7.27839000  |
| F | 0.42260300  | -1.83584300 | 6.52160300  |
| F | 2.52622600  | -1.61521700 | 6.08965000  |
| H | 0.92906300  | -0.84583100 | -1.02597800 |
| H | 1.40566200  | -2.32728200 | 0.90166500  |
| H | 0.94033800  | 0.98913000  | 3.57573600  |
| H | 0.43131500  | 2.47356800  | 1.64783500  |
| H | 0.43295800  | 1.55551500  | -0.65661900 |
| H | -1.66920300 | -1.32597500 | 4.78520500  |
| H | -3.38190300 | -1.52831200 | 6.56231900  |
| H | -4.50597800 | -3.70218500 | 6.96143800  |
| H | -3.89832600 | -5.67832200 | 5.59392400  |
| H | -2.14082000 | -5.49419500 | 3.85982900  |
| H | 3.41438000  | -3.24214400 | 4.29784200  |
| H | 2.50296600  | -4.64156100 | 3.70256800  |
| H | 2.47356000  | -5.64341800 | 6.02423000  |
| H | 3.94782200  | -6.76828400 | 7.31614400  |
| H | 6.25140100  | -7.10805200 | 8.19894800  |
| H | 8.07231300  | -5.62972900 | 7.42470000  |
| H | 7.66212800  | -3.82541300 | 5.79595500  |
| C | 5.57864200  | -4.25695700 | 5.61381000  |
| H | 5.39252900  | -3.46233800 | 4.90303000  |

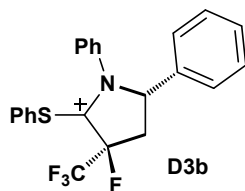

|   |             |             |             |
|---|-------------|-------------|-------------|
| C | 0.96610500  | -1.20501900 | 0.07379900  |
| C | 1.05524700  | 0.14342700  | 0.40177000  |
| C | 0.05698100  | 0.99579500  | -0.05041400 |
| C | -1.01347500 | 0.55829800  | -0.82087700 |
| C | -1.08467600 | -0.79246400 | -1.13998100 |

|   |             |             |             |
|---|-------------|-------------|-------------|
| C | -0.09880300 | -1.66894200 | -0.69355800 |
| N | 0.15249800  | 2.39888200  | 0.26658900  |
| C | -0.50308700 | 2.97330400  | 1.22069100  |
| C | -0.14812600 | 4.46772700  | 1.28020700  |
| S | -1.49488300 | 2.03506800  | 2.27133700  |
| C | 0.92563200  | 4.63093500  | 0.19620400  |
| F | 0.36650500  | 4.73873100  | 2.52025600  |
| C | 1.07013100  | 3.27952200  | -0.51594200 |
| C | -1.39067700 | 5.39108600  | 1.09209600  |
| F | -1.11408200 | 6.43776800  | 0.31768300  |
| F | -1.82257500 | 5.86558700  | 2.25201900  |
| F | -2.38840800 | 4.71383200  | 0.50995000  |
| H | 1.73040800  | -1.89050000 | 0.41844700  |
| H | 1.87377500  | 0.53096700  | 0.99742800  |
| H | -1.76348200 | 1.26479700  | -1.15865000 |
| H | -1.90870900 | -1.15734100 | -1.74054500 |
| H | -0.16030500 | -2.72053500 | -0.94689700 |
| H | 1.85019100  | 4.89063300  | 0.71064800  |
| H | 0.68367700  | 5.42447700  | -0.50410900 |
| C | -2.23444500 | 3.23950100  | 3.36740800  |
| C | -3.56171100 | 3.59868300  | 3.14469600  |
| C | -1.52507800 | 3.70047100  | 4.47394100  |
| C | -4.17561600 | 4.47522000  | 4.03191400  |
| H | -4.10061500 | 3.21111500  | 2.28844100  |
| C | -2.14966800 | 4.58360600  | 5.34568700  |
| H | -0.50335400 | 3.38438800  | 4.64329900  |
| C | -3.46836800 | 4.97197300  | 5.12257800  |
| H | -5.20492500 | 4.76960300  | 3.86742100  |
| H | -1.60711600 | 4.96160000  | 6.20364200  |
| H | -3.94987400 | 5.65848100  | 5.80896800  |
| C | 0.69000800  | 3.22940700  | -1.97778500 |
| C | 1.49802400  | 2.52807900  | -2.86899300 |
| C | -0.49087900 | 3.82021200  | -2.43069600 |
| C | 1.13469200  | 2.42353400  | -4.20924000 |
| H | 2.41068800  | 2.06276800  | -2.51158600 |
| C | -0.85473700 | 3.71221600  | -3.76704100 |
| H | -1.13098400 | 4.36356900  | -1.74313000 |
| C | -0.04158400 | 3.01369100  | -4.65789800 |
| H | 1.76952600  | 1.87987400  | -4.89881200 |
| H | -1.77195100 | 4.17289200  | -4.11426900 |
| H | -0.32673100 | 2.93166800  | -5.70026200 |
| H | 2.06822900  | 2.85924700  | -0.38350200 |

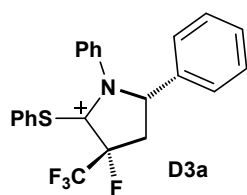

|   |             |             |             |
|---|-------------|-------------|-------------|
| C | -0.17366000 | -0.25066000 | 0.06915800  |
| C | 0.11493600  | 1.05971300  | 0.43294900  |
| C | -0.39014300 | 2.08587400  | -0.35556000 |
| C | -1.16189200 | 1.85240500  | -1.48673500 |
| C | -1.43728300 | 0.53535200  | -1.83660700 |
| C | -0.94419500 | -0.51039000 | -1.06122000 |
| N | -0.09471000 | 3.45580700  | -0.01556000 |
| C | -0.77313900 | 4.15687300  | 0.83651100  |
| C | -0.30898400 | 5.61399200  | 0.75575100  |
| S | -2.03884400 | 3.44744900  | 1.75841100  |
| C | 1.05646000  | 5.50405900  | 0.08783800  |
| F | -0.25707800 | 6.22844600  | 1.96887100  |
| C | 0.98836300  | 4.21357300  | -0.73331700 |
| C | 2.24932700  | 3.39212300  | -0.79807700 |
| C | 2.71264500  | 2.94728800  | -2.03369000 |
| C | 3.85968600  | 2.16162500  | -2.10773400 |
| C | 4.53735700  | 1.81078900  | -0.94520200 |
| C | 4.06924800  | 2.24550300  | 0.29376400  |
| C | -1.29892600 | 6.42070600  | -0.10157400 |
| F | -0.85951700 | 7.66449500  | -0.25264600 |
| F | -2.50705200 | 6.47354200  | 0.45148400  |
| F | -1.41653200 | 5.86028600  | -1.30839500 |
| H | 0.20830600  | -1.06756200 | 0.66884600  |
| H | 0.71376500  | 1.28727700  | 1.30710100  |
| H | -1.53499100 | 2.68652700  | -2.07073600 |
| H | -2.03691200 | 0.32926300  | -2.71459700 |
| H | -1.16153400 | -1.53467900 | -1.33935200 |
| H | 1.79129300  | 5.41684100  | 0.88923900  |
| H | 1.29185200  | 6.37082400  | -0.52655000 |
| H | 0.61372000  | 4.39878000  | -1.74188200 |
| H | 2.17410000  | 3.21719400  | -2.93604900 |
| H | 4.21929000  | 1.82230500  | -3.07185900 |
| H | 5.42862800  | 1.19674200  | -1.00107100 |
| H | 4.59307000  | 1.96797000  | 1.20078800  |
| C | 2.92900900  | 3.03515900  | 0.36846600  |
| H | 2.56060100  | 3.36144800  | 1.33658600  |
| C | -2.47466000 | 4.69200600  | 2.97312700  |
| C | -3.68225300 | 5.36843500  | 2.83294700  |
| C | -1.67685600 | 4.84218300  | 4.10533400  |

|   |             |            |            |
|---|-------------|------------|------------|
| C | -4.07938600 | 6.24405100 | 3.83826000 |
| H | -4.29757300 | 5.22115300 | 1.95399300 |
| C | -2.08176500 | 5.72776000 | 5.09560100 |
| H | -0.75330600 | 4.28455700 | 4.20480300 |
| C | -3.27942400 | 6.42668500 | 4.96159300 |
| H | -5.01489400 | 6.78094400 | 3.73967100 |
| H | -1.46519000 | 5.86426200 | 5.97563200 |
| H | -3.59340300 | 7.11074200 | 5.74105100 |

## VI. X-Ray Crystal Structure Determinations

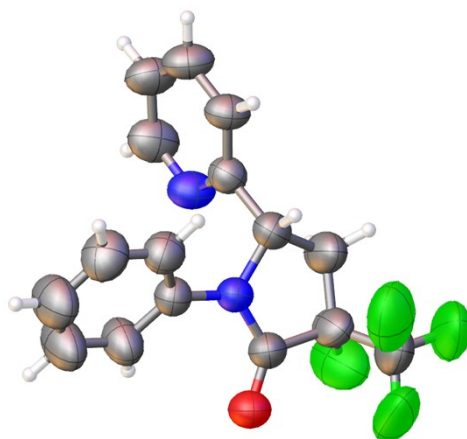

Single crystal of **3a** (CCDC 2209201) was obtained by recrystallization from a mixed solvent of acetone/ petroleum ether at room temperature (evaporation in air). The X-ray single-crystal determination was performed on a Bruker APEX II X-ray single crystal diffractometer.



Bond precision: C-C = 0.0059 Å Wavelength=1.54184  
Cell: a=15.5988 (5) b=8.2297 (4) c=12.1249 (6)  
alpha=90 beta=101.812 (4) gamma=90  
Temperature: 295 K

|                        | Calculated      | Reported        |
|------------------------|-----------------|-----------------|
| Volume                 | 1523.56 (12)    | 1523.56 (12)    |
| Space group            | P 21/c          | P 1 21/c 1      |
| Hall group             | -P 2ybc         | -P 2ybc         |
| Moiety formula         | C16 H12 F4 N2 O | C16 H12 F4 N2 O |
| Sum formula            | C16 H12 F4 N2 O | C16 H12 F4 N2 O |
| Mr                     | 324.28          | 324.28          |
| Dx, g cm <sup>-3</sup> | 1.414           | 1.414           |
| Z                      | 4               | 4               |
| Mu (mm <sup>-1</sup> ) | 1.073           | 1.073           |
| F000                   | 664.0           | 664.0           |
| F000'                  | 666.66          |                 |
| h, k, lmax             | 19, 10, 15      | 19, 10, 15      |
| Nref                   | 3216            | 3031            |
| Tmin, Tmax             | 0.975, 0.979    | 0.809, 1.000    |
| Tmin'                  | 0.968           |                 |

Correction method= # Reported T Limits: Tmin=0.809 Tmax=1.000  
AbsCorr = MULTI-SCAN

Data completeness= 0.942 Theta(max)= 76.552

R(reflections)= 0.0722 ( 1541) wR2(reflections)=  
0.2354 ( 3031)  
S = 1.307 Npar= 208

## VII. Characterization Data of the Products

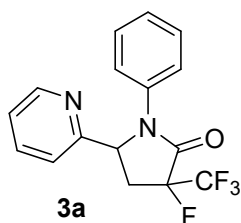

Chemical Formula: C<sub>16</sub>H<sub>12</sub>F<sub>4</sub>N<sub>2</sub>O

**3-fluoro-1-phenyl-5-(pyridin-2-yl)-3-(trifluoromethyl)pyrrolidin-2-one (3a):** yellow solid (mp = 118.3-118.8 °C), 26.8 mg, (Yield: 83%).

<sup>1</sup>H NMR (400 MHz, Chloroform-*d*) δ (ppm) = 8.60 – 8.54 (m, 1H), 7.60 (td, *J* = 7.7, 1.8 Hz, 1H), 7.46 – 7.40 (m, 2H), 7.32 – 7.26 (m, 2H), 7.22 – 7.13 (m, 3H), 5.40 (ddd, *J* = 7.7, 5.6, 3.8 Hz, 1H), 3.22 (td, *J* = 14.8, 7.7 Hz, 1H), 2.77 – 2.62 (m, 1H).

$^{13}\text{C}$  NMR (101 MHz, Chloroform-*d*)  $\delta$  (ppm) = 163.1 (d,  $J$  = 22.3 Hz), 157.5, 150.1, 137.3, 136.3, 129.0, 126.7, 123.5, 122.9, 121.4, 121.1 (qd,  $J$  = 282.0, 31.8 Hz), 92.3 (dq,  $J$  = 199.8, 34.4 Hz), 60.6, 34.1 (d,  $J$  = 20.5 Hz).

$^{19}\text{F}$  NMR (376 MHz, Chloroform-*d*)  $\delta$  (ppm) = -79.88 (d,  $J$  = 10.5 Hz, 3F), -167.16 (q,  $J$  = 10.6 Hz, 1F).

HRMS (ESI)  $m/z$ :  $[M + H]^+$  Calcd for  $\text{C}_{16}\text{H}_{13}\text{F}_4\text{N}_2\text{O}$  325.0959; Found 325.0958.

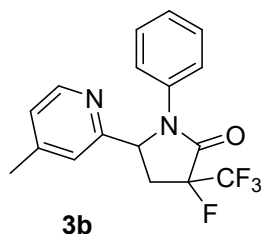

Chemical Formula:  $\text{C}_{17}\text{H}_{14}\text{F}_4\text{N}_2\text{O}$

**3-fluoro-5-(4-methylpyridin-2-yl)-1-phenyl-3-(trifluoromethyl)pyrrolidin-2-one (3b)**: yellow solid (mp = 125.6-126.6 °C), 27.6 mg, (Yield: 81%).

$^1\text{H}$  NMR (400 MHz, Chloroform-*d*)  $\delta$  (ppm) = 8.41 (d,  $J$  = 5.0 Hz, 1H), 7.48 – 7.40 (m, 2H), 7.32 – 7.25 (m, 2H), 7.20 – 7.11 (m, 1H), 7.04 – 6.95 (m, 2H), 5.35 (ddd,  $J$  = 7.8, 5.5, 3.9 Hz, 1H), 3.19 (td,  $J$  = 14.9, 7.8 Hz, 1H), 2.66 (dddd,  $J$  = 25.7, 15.0, 5.5, 1.2 Hz, 1H), 2.26 (s, 3H).

$^{13}\text{C}$  NMR (101 MHz, Chloroform-*d*)  $\delta$  (ppm) = 163.1 (d,  $J$  = 22.1 Hz), 157.4, 149.7, 136.4, 129.0, 126.6, 124.5, 122.7, 122.0 (qd,  $J$  = 283.3, 32.3 Hz), 92.4 (dq,  $J$  = 201.0, 34.3 Hz), 60.6, 34.1 (d,  $J$  = 20.3 Hz), 21.0.

$^{19}\text{F}$  NMR (376 MHz, Chloroform-*d*)  $\delta$  (ppm) = -79.91 (d,  $J$  = 10.4 Hz, 3F), -167.10 (q,  $J$  = 10.7 Hz, 1F).

HRMS (ESI)  $m/z$ :  $[M + H]^+$  Calcd for  $\text{C}_{17}\text{H}_{15}\text{F}_4\text{N}_2\text{O}$  339.1115; Found 339.1112.

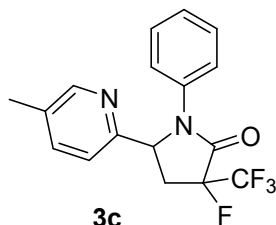

Chemical Formula:  $\text{C}_{17}\text{H}_{14}\text{F}_4\text{N}_2\text{O}$

**3-fluoro-5-(5-methylpyridin-2-yl)-1-phenyl-3-(trifluoromethyl)pyrrolidin-2-one (3c)**: white solid (mp = 105.6-127.3 °C), 27.6 mg, (Yield: 81%).

$^1\text{H}$  NMR (400 MHz, Chloroform-*d*)  $\delta$  (ppm) = 8.42 – 8.35 (m, 1H), 7.45 – 7.37 (m, 3H), 7.32 – 7.23 (m, 2H), 7.19 – 7.11 (m, 1H), 7.05 (d,  $J$  = 7.9 Hz, 1H), 5.36 (ddd,  $J$  = 7.7, 5.7, 3.9 Hz, 1H), 3.19 (td,  $J$  = 14.6, 7.7 Hz, 1H), 2.67 (dddd,  $J$  = 25.6, 15.0, 5.7, 1.3 Hz, 1H), 2.28 (s, 3H).

$^{13}\text{C}$  NMR (101 MHz, Chloroform-*d*)  $\delta$  (ppm) = 163.1 (d,  $J$  = 22.3 Hz), 154.6, 150.5, 137.7, 136.4, 133.2, 129.0, 126.7, 122.9, 121.9 (qd,  $J$  = 284.7, 31.8 Hz), 120.8, 92.4 (dq,  $J$  = 200.0, 34.2 Hz), 60.4, 34.2 (d,  $J$  = 20.2 Hz), 18.1.

$^{19}\text{F}$  NMR (376 MHz, Chloroform-*d*)  $\delta$  (ppm) = -79.89 (d,  $J$  = 10.7 Hz, 3F), -167.21 (q,  $J$  = 10.9 Hz, 1F).

HRMS (ESI)  $m/z$ :  $[M + H]^+$  Calcd for  $\text{C}_{17}\text{H}_{15}\text{F}_4\text{N}_2\text{O}$  339.1115; Found 339.1114.

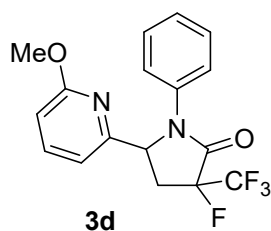

Chemical Formula:  $C_{17}H_{14}F_4N_2O_2$

**3-fluoro-5-(6-methoxypyridin-2-yl)-1-phenyl-3-(trifluoromethyl)pyrrolidin-2-one (3d):** yellow dense oil, 25.3 mg, (Yield: 71%).

**$^1H$  NMR** (400 MHz, Chloroform-*d*)  $\delta$  (ppm) = 7.44 (dd,  $J = 8.4, 7.2$  Hz, 1H), 7.39 – 7.34 (m, 2H), 7.32 – 7.24 (m, 2H), 7.19 – 7.12 (m, 1H), 6.72 (dd,  $J = 7.2, 0.7$  Hz, 1H), 6.61 (dd,  $J = 8.3, 0.7$  Hz, 1H), 5.22 (ddd,  $J = 7.8, 5.2, 4.2$  Hz, 1H), 3.89 (s, 3H), 3.13 (td,  $J = 14.8, 7.7$  Hz, 1H), 2.72 (dddd,  $J = 26.2, 15.0, 5.3, 1.2$  Hz, 1H).

**$^{13}C$  NMR** (101 MHz, Chloroform-*d*)  $\delta$  (ppm) = 164.4, 163.2 (d,  $J = 22.5$  Hz), 154.4, 139.2, 136.5, 128.9, 126.8, 123.4, 122.0 (qd,  $J = 283.5, 32.0$  Hz), 114.8, 111.1, 92.2 (dq,  $J = 200.1, 34.0$  Hz), 60.3, 53.5, 33.5 (d,  $J = 20.7$  Hz).

**$^{19}F$  NMR** (376 MHz, Chloroform-*d*)  $\delta$  (ppm) = -80.01 (d,  $J = 10.7$  Hz, 3F), -167.27 (q,  $J = 10.6$  Hz, 1F).

**HRMS (ESI) m/z:**  $[M + H]^+$  Calcd for  $C_{17}H_{15}F_4N_2O_2$  355.1064; Found 355.1063.

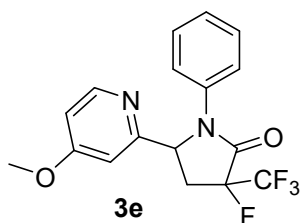

Chemical Formula:  $C_{17}H_{14}F_4N_2O_2$

**3-fluoro-5-(4-methoxypyridin-2-yl)-1-phenyl-3-(trifluoromethyl)pyrrolidin-2-one (3e):** yellow solid (mp = 104.2-124.7 °C), 27.5 mg, (Yield: 77%).

**$^1H$  NMR** (400 MHz, Chloroform-*d*)  $\delta$  (ppm) = 8.38 (d,  $J = 5.6$  Hz, 1H), 7.45 (d,  $J = 8.0$  Hz, 2H), 7.30 (t,  $J = 7.8$  Hz, 2H), 7.16 (t,  $J = 7.4$  Hz, 1H), 6.74 – 6.63 (m, 2H), 5.35 (dt,  $J = 8.4, 4.7$  Hz, 1H), 3.74 (s, 3H), 3.20 (td,  $J = 15.1, 7.8$  Hz, 1H), 2.66 (ddd,  $J = 25.7, 15.1, 5.5$  Hz, 1H).

**$^{13}C$  NMR** (101 MHz, Chloroform-*d*)  $\delta$  (ppm) = 166.6, 163.1 (d,  $J = 22.3$  Hz), 159.3, 151.3, 136.4, 129.0, 126.7, 122.7, 121.8 (qd,  $J = 283.4, 31.8$  Hz), 109.2, 107.7 (d,  $J = 1.3$  Hz), 92.3 (dq,  $J = 199.8, 34.3$  Hz), 60.5, 55.2, 34.0 (d,  $J = 20.4$  Hz).

**$^{19}F$  NMR** (376 MHz, Chloroform-*d*)  $\delta$  (ppm) = -79.89 (d,  $J = 10.8$  Hz, 3F), -166.93 (q,  $J = 10.9$  Hz, 1F).

**HRMS (ESI) m/z:**  $[M + H]^+$  Calcd for  $C_{17}H_{15}F_4N_2O_2$  355.1064; Found 355.1063.

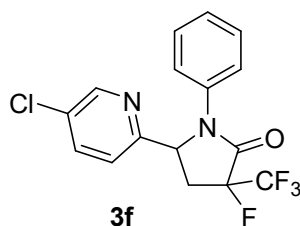

Chemical Formula:  $C_{16}H_{11}ClF_4N_2O$

**5-(5-chloropyridin-2-yl)-3-fluoro-1-phenyl-3-(trifluoromethyl)pyrrolidin-2-one (3f):** white solid (mp = 143.9-144.7 °C), 22.9 mg, (Yield: 64%).

**<sup>1</sup>H NMR** (400 MHz, Chloroform-*d*)  $\delta$  (ppm) = 8.53 (d,  $J$  = 2.4 Hz, 1H), 7.58 (dd,  $J$  = 8.4, 2.4 Hz, 1H), 7.43 – 7.37 (m, 2H), 7.34 – 7.27 (m, 2H), 7.22 – 7.14 (m, 1H), 7.12 (d,  $J$  = 8.4 Hz, 1H), 5.39 (ddd,  $J$  = 7.8, 5.5, 3.8 Hz, 1H), 3.21 (td,  $J$  = 15.0, 7.7 Hz, 1H), 2.66 (dddd,  $J$  = 25.5, 15.1, 5.5, 1.2 Hz, 1H).

**<sup>13</sup>C NMR** (101 MHz, Chloroform-*d*)  $\delta$  (ppm) = 163.0 (d,  $J$  = 22.3 Hz), 155.6, 149.1, 137.0, 136.1, 131.9, 129.2, 126.9, 122.9, 122.2, 121.8 (qd,  $J$  = 283.4, 31.8 Hz), 92.2 (dq,  $J$  = 200.2, 34.2 Hz), 60.0, 34.0 (d,  $J$  = 20.5 Hz).

**<sup>19</sup>F NMR** (376 MHz, Chloroform-*d*)  $\delta$  (ppm) = -79.86 (d,  $J$  = 10.6 Hz, 3F), -167.02 (q,  $J$  = 10.8 Hz, 1F).

**HRMS (ESI) m/z:** [M + H]<sup>+</sup> Calcd for C<sub>16</sub>H<sub>12</sub>ClF<sub>4</sub>N<sub>2</sub>O 359.0569; Found 359.0566.

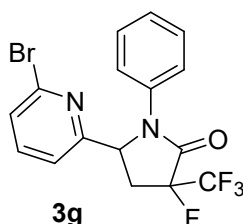

Chemical Formula: C<sub>16</sub>H<sub>11</sub>BrF<sub>4</sub>N<sub>2</sub>O

**5-(6-bromopyridin-2-yl)-3-fluoro-1-phenyl-3-(trifluoromethyl)pyrrolidin-2-one (3g):** dense yellow oil, 26.3 mg, (Yield: 65%).

**<sup>1</sup>H NMR** (400 MHz, Chloroform-*d*)  $\delta$  (ppm) = 7.50 – 7.42 (m, 3H), 7.41 – 7.36 (m, 1H), 7.32 (dd,  $J$  = 8.7, 7.2 Hz, 2H), 7.22 – 7.15 (m, 1H), 7.11 (d,  $J$  = 7.5 Hz, 1H), 5.40 (td,  $J$  = 4.9, 2.5 Hz, 1H), 3.22 (ddd,  $J$  = 17.0, 15.1, 7.9 Hz, 1H), 2.72 – 2.57 (m, 1H).

**<sup>13</sup>C NMR** (101 MHz, Chloroform-*d*)  $\delta$  (ppm) = 163.0 (d,  $J$  = 22.5 Hz), 159.2, 142.3, 139.6, 136.1, 129.2, 128.0, 126.9, 122.6, 121.7 (qd,  $J$  = 283.3, 31.5 Hz), 119.8, 92.3 (dq,  $J$  = 199.9, 34.3 Hz), 60.0, 34.0 (d,  $J$  = 20.6 Hz).

**<sup>19</sup>F NMR** (376 MHz, Chloroform-*d*)  $\delta$  (ppm) = -79.79 (d,  $J$  = 10.3 Hz, 3F), -166.94 (q,  $J$  = 10.7 Hz, 1F).

**HRMS (ESI) m/z:** [M + H]<sup>+</sup> Calcd for C<sub>16</sub>H<sub>12</sub>BrF<sub>4</sub>N<sub>2</sub>O 403.0064; Found 403.0062.

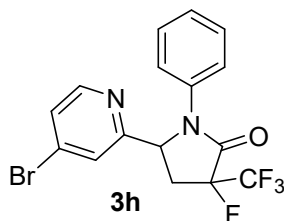

Chemical Formula: C<sub>16</sub>H<sub>11</sub>BrF<sub>4</sub>N<sub>2</sub>O

**5-(4-bromopyridin-2-yl)-3-fluoro-1-phenyl-3-(trifluoromethyl)pyrrolidin-2-one (3h):** yellow solid (mp = 82.1-82.7 °C), 33.2 mg, (Yield: 82%).

**<sup>1</sup>H NMR** (400 MHz, Chloroform-*d*)  $\delta$  (ppm) = 8.38 (dd,  $J$  = 5.1, 1.4 Hz, 1H), 7.44 – 7.27 (m, 6H), 7.22 – 7.12 (m, 1H), 5.36 (ddd,  $J$  = 7.7, 5.4, 3.8 Hz, 1H), 3.20 (td,  $J$  = 15.0, 7.8 Hz, 1H), 2.67 (dddd,  $J$  = 25.4, 15.1, 5.5, 1.3 Hz, 1H).

$^{13}\text{C}$  NMR (101 MHz, Chloroform-*d*)  $\delta$  (ppm) = 163.0 (d,  $J$  = 22.2 Hz), 159.0, 150.8, 136.0, 133.9, 129.2, 127.0, 126.9, 125.0, 122.9, 121.8 (qd,  $J$  = 283.4, 31.8 Hz), 92.1 (dq,  $J$  = 200.3, 34.2 Hz), 60.1, 33.8 (d,  $J$  = 20.7 Hz).

$^{19}\text{F}$  NMR (376 MHz, Chloroform-*d*)  $\delta$  (ppm) = -79.88 (d,  $J$  = 10.7 Hz, 3F), -166.98 (dt,  $J$  = 13.2, 10.6 Hz, 1F).

**HRMS (ESI) m/z:**  $[\text{M} + \text{H}]^+$  Calcd for  $\text{C}_{16}\text{H}_{12}\text{BrF}_4\text{N}_2\text{O}$  403.0064; Found 403.0062.

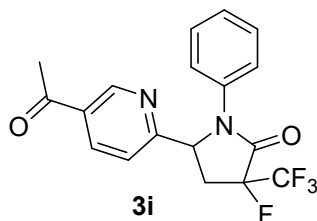

Chemical Formula:  $\text{C}_{18}\text{H}_{14}\text{F}_4\text{N}_2\text{O}_2$

**5-(5-acetylpyridin-2-yl)-3-fluoro-1-phenyl-3-(trifluoromethyl)pyrrolidin-2-one (3i):** yellow solid (mp = 96.9-98.7 °C), 23.9 mg, (Yield: 65%).

$^1\text{H}$  NMR (400 MHz, Chloroform-*d*)  $\delta$  (ppm) = 9.11 (d,  $J$  = 2.2 Hz, 1H), 8.14 (dd,  $J$  = 8.2, 2.2 Hz, 1H), 7.47 – 7.39 (m, 2H), 7.34 – 7.25 (m, 3H), 7.22 – 7.13 (m, 1H), 5.49 (ddd,  $J$  = 8.5, 5.3, 3.7 Hz, 1H), 3.24 (td,  $J$  = 15.4, 7.9 Hz, 1H), 2.74 – 2.55 (m, 4H).

$^{13}\text{C}$  NMR (101 MHz, Chloroform-*d*)  $\delta$  (ppm) = 195.9, 163.0 (d,  $J$  = 22.2 Hz), 161.8, 150.2, 136.9, 136.1, 129.2, 126.9, 122.6, 121.7 (qd,  $J$  = 283.4, 31.6 Hz), 121.2, 92.2 (dq,  $J$  = 200.1, 34.3 Hz), 60.3, 33.8 (d,  $J$  = 20.7 Hz), 26.7.

$^{19}\text{F}$  NMR (376 MHz, Chloroform-*d*)  $\delta$  (ppm) = -79.84 (d,  $J$  = 10.7 Hz, 3F), -166.85 (q,  $J$  = 10.8 Hz, 1F).

**HRMS (ESI) m/z:**  $[\text{M} + \text{H}]^+$  Calcd for  $\text{C}_{18}\text{H}_{15}\text{F}_4\text{N}_2\text{O}_2$  367.1064; Found 367.1062.

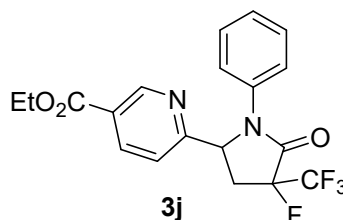

Chemical Formula:  $\text{C}_{19}\text{H}_{16}\text{F}_4\text{N}_2\text{O}_3$

**ethyl 6-(4-fluoro-5-oxo-1-phenyl-4-(trifluoromethyl)pyrrolidin-2-yl)nicotinate (3j):** dense yellow oil, 25.9 mg, (Yield: 64%).

$^1\text{H}$  NMR (400 MHz, Chloroform-*d*)  $\delta$  (ppm) = 9.17 (d,  $J$  = 2.1 Hz, 1H), 8.21 (dd,  $J$  = 8.2, 2.2 Hz, 1H), 7.47 – 7.40 (m, 2H), 7.33 – 7.22 (m, 3H), 7.20 – 7.13 (m, 1H), 5.52 – 5.44 (m, 1H), 4.39 (q,  $J$  = 7.1 Hz, 2H), 3.24 (td,  $J$  = 15.3, 7.8 Hz, 1H), 2.67 (ddd,  $J$  = 25.3, 15.1, 5.4 Hz, 1H), 1.38 (t,  $J$  = 7.1 Hz, 3H).

$^{13}\text{C}$  NMR (101 MHz, Chloroform-*d*)  $\delta$  (ppm) = 164.5, 163.0 (d,  $J$  = 22.2 Hz), 161.7, 151.2, 138.4, 136.1, 129.2, 126.9, 126.1, 122.6, 121.8 (qd,  $J$  = 283.3, 31.7 Hz), 120.9, 92.2 (dq,  $J$  = 200.2, 34.2 Hz), 61.6, 60.4, 33.9 (d,  $J$  = 20.7 Hz), 14.2.

$^{19}\text{F}$  NMR (376 MHz, Chloroform-*d*)  $\delta$  (ppm) = -79.84 (d,  $J$  = 10.6 Hz, 3F), -166.91 (q,  $J$  = 10.8 Hz, 1F).

**HRMS (ESI) m/z:**  $[\text{M} + \text{H}]^+$  Calcd for  $\text{C}_{19}\text{H}_{17}\text{F}_4\text{N}_2\text{O}_3$  397.1170; Found 397.1168.

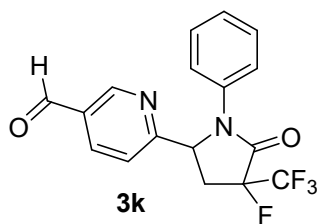

Chemical Formula:  $C_{17}H_{12}F_4N_2O_2$

**6-(4-fluoro-5-oxo-1-phenyl-4-(trifluoromethyl)pyrrolidin-2-yl)nicotinaldehyde (3k):** dense brown oil, 15.9 mg, (Yield: 45%).

**$^1H$  NMR** (400 MHz, Chloroform-*d*)  $\delta$  (ppm) = 10.06 (s, 1H), 9.04 (dd,  $J$  = 2.2, 0.8 Hz, 1H), 8.09 (dd,  $J$  = 8.1, 2.2 Hz, 1H), 7.47 – 7.40 (m, 2H), 7.36 (d,  $J$  = 8.1 Hz, 1H), 7.33 – 7.25 (m, 2H), 7.21 – 7.13 (m, 1H), 5.51 (ddd,  $J$  = 8.0, 5.3, 3.6 Hz, 1H), 3.26 (ddd,  $J$  = 16.1, 15.1, 7.9 Hz, 1H), 2.75 – 2.61 (m, 1H).

**$^{13}C$  NMR** (101 MHz, Chloroform-*d*)  $\delta$  (ppm) = 189.7, 163.3, 163.0 (d,  $J$  = 22.5 Hz), 152.1, 137.4, 136.1, 131.0, 129.2, 127.0, 122.6, 121.7, 121.7 (qd,  $J$  = 284.4, 31.8 Hz), 92.2 (dq,  $J$  = 200.0, 34.3 Hz), 60.4, 33.8 (d,  $J$  = 20.8 Hz).

**$^{19}F$  NMR** (376 MHz, Chloroform-*d*)  $\delta$  (ppm) = -79.81 (d,  $J$  = 10.5 Hz, 3F), -166.82 (q,  $J$  = 10.4 Hz, 1F).

**HRMS (ESI) m/z:**  $[M + H]^+$  Calcd for  $C_{17}H_{13}F_4N_2O_2$  353.0908; Found 353.0907.

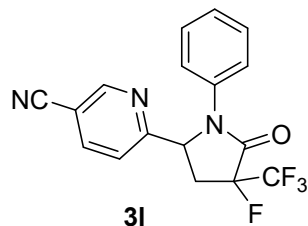

Chemical Formula:  $C_{17}H_{11}F_4N_3O$

**6-(4-fluoro-5-oxo-1-phenyl-4-(trifluoromethyl)pyrrolidin-2-yl)nicotinonitrile (3l):** yellow solid (mp = 157.1-157.9 °C), 22.9 mg, (Yield: 65%).

**$^1H$  NMR** (400 MHz, Chloroform-*d*)  $\delta$  (ppm) = 8.85 (d,  $J$  = 2.0 Hz, 1H), 7.89 (dd,  $J$  = 8.2, 2.1 Hz, 1H), 7.45 – 7.38 (m, 2H), 7.36 – 7.28 (m, 3H), 7.23 – 7.16 (m, 1H), 5.49 (ddd,  $J$  = 8.3, 5.1, 3.6 Hz, 1H), 3.25 (ddd,  $J$  = 16.8, 15.1, 8.0 Hz, 1H), 2.72 – 2.57 (m, 1H).

**$^{13}C$  NMR** (101 MHz, Chloroform-*d*)  $\delta$  (ppm) = 162.9 (d,  $J$  = 22.0 Hz), 161.9, 152.7, 140.6, 135.9, 129.3, 127.1, 122.5, 121.6 (qd,  $J$  = 283.2, 31.5 Hz), 121.3, 115.9, 109.8, 92.1 (dq,  $J$  = 200.1, 34.5 Hz), 60.2, 33.7 (d,  $J$  = 20.7 Hz).

**$^{19}F$  NMR** (376 MHz, Chloroform-*d*)  $\delta$  (ppm) = -79.79 (d,  $J$  = 10.4 Hz, 3F), -166.60 (q,  $J$  = 10.6 Hz, 1F).

**HRMS (ESI) m/z:**  $[M + H]^+$  Calcd for  $C_{17}H_{12}F_4N_3O$  350.0911; Found 350.0908.

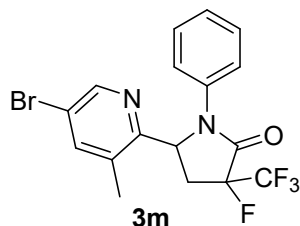

Chemical Formula:  $C_{17}H_{13}BrF_4N_2O$

**5-(5-bromo-3-methylpyridin-2-yl)-3-fluoro-1-phenyl-3-(trifluoromethyl)pyrrolidin-2-one**

(**3m**): yellow solid (mp = 110.6-111.1 °C), 26.8 mg, (Yield: 63%).

<sup>1</sup>H NMR (400 MHz, Chloroform-*d*) δ (ppm) = 8.47 (d, *J* = 2.2 Hz, 1H), 7.53 (d, *J* = 2.2 Hz, 1H), 7.30 – 7.14 (m, 5H), 5.46 (td, *J* = 6.9, 4.2 Hz, 1H), 3.12 (ddd, *J* = 14.7, 9.3, 7.3 Hz, 1H), 2.84 – 2.69 (m, 1H), 2.26 (s, 3H).

<sup>13</sup>C NMR (101 MHz, Chloroform-*d*) δ (ppm) = 163.0 (d, *J* = 22.6 Hz), 152.8, 149.0, 140.9, 136.3, 133.1, 129.0, 127.3, 124.1, 122.1 (qd, *J* = 283.9, 32.3 Hz), 120.2, 91.9 (dq, *J* = 201.5, 33.8 Hz), 56.5, 32.8 (d, *J* = 20.8 Hz), 17.7.

<sup>19</sup>F NMR (376 MHz, Chloroform-*d*) δ (ppm) = -80.06 (d, *J* = 10.9 Hz, 3F), -168.42 (q, *J* = 10.8 Hz, 1F).

**HRMS (ESI) m/z:** [M + H]<sup>+</sup> Calcd for C<sub>17</sub>H<sub>14</sub>BrF<sub>4</sub>N<sub>2</sub>O 417.0220; Found 417.0219.

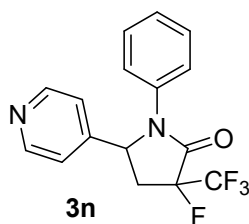

Chemical Formula: C<sub>16</sub>H<sub>12</sub>F<sub>4</sub>N<sub>2</sub>O

**3-fluoro-1-phenyl-5-(pyridin-4-yl)-3-(trifluoromethyl)pyrrolidin-2-one (3n):** yellow solid (mp = 156.9-157.7 °C), 24.4 mg, (Yield: 75%).

<sup>1</sup>H NMR (400 MHz, Chloroform-*d*) δ (ppm) = 8.60 – 8.55 (m, 2H), 7.42 – 7.35 (m, 2H), 7.35 – 7.27 (m, 2H), 7.21 – 7.14 (m, 3H), 5.31 – 5.24 (m, 1H), 3.26 (td, *J* = 15.3, 7.9 Hz, 1H), 2.50 – 2.36 (m, 1H).

<sup>13</sup>C NMR (101 MHz, Chloroform-*d*) δ (ppm) = 162.9 (d, *J* = 22.2 Hz), 150.8, 147.6, 135.7, 129.2, 127.1, 122.7, 121.6 (qd, *J* = 283.5, 31.6 Hz), 121.2, 92.0 (dq, *J* = 200.1, 34.4 Hz), 58.3, 35.3 (d, *J* = 20.5 Hz).

<sup>19</sup>F NMR (376 MHz, Chloroform-*d*) δ (ppm) = -79.78 (d, *J* = 10.4 Hz, 3F), -165.85 (q, *J* = 10.5 Hz, 1F).

**HRMS (ESI) m/z:** [M + H]<sup>+</sup> Calcd for C<sub>16</sub>H<sub>13</sub>F<sub>4</sub>N<sub>2</sub>O 325.0959; Found 325.0956.

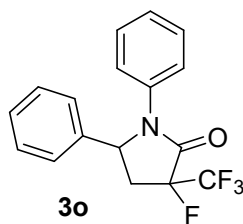

Chemical Formula: C<sub>17</sub>H<sub>13</sub>F<sub>4</sub>NO

**3-fluoro-1,5-diphenyl-3-(trifluoromethyl)pyrrolidin-2-one (3o):** white solid (mp = 106.9-107.6 °C), 16.5 mg, (Yield: 51%).

<sup>1</sup>H NMR (400 MHz, Chloroform-*d*) δ (ppm) = 7.39 – 7.34 (m, 2H), 7.34 – 7.21 (m, 7H), 7.16 – 7.11 (m, 1H), 5.23 (ddd, *J* = 7.6, 6.1, 4.1 Hz, 1H), 3.23 (ddd, *J* = 15.2, 12.8, 7.6 Hz, 1H), 2.47 (dddd, *J* = 26.0, 15.2, 6.1, 1.3 Hz, 1H).

<sup>13</sup>C NMR (101 MHz, Chloroform-*d*) δ (ppm) = 163.1 (d, *J* = 22.3 Hz), 138.6, 136.2, 129.2, 128.9, 128.7, 126.7, 126.5, 123.3, 121.9 (qd, *J* = 283.6, 31.9 Hz), 92.2 (dq, *J* = 199.8, 34.2 Hz), 59.5 (d, *J* = 2.4 Hz), 36.2 (d, *J* = 20.0 Hz).

$^{19}\text{F}$  NMR (376 MHz, Chloroform-*d*)  $\delta$  (ppm) = -79.85 (d,  $J$  = 10.7 Hz, 3F), -166.37 (q,  $J$  = 10.9 Hz, 1F).

HRMS (ESI)  $m/z$ :  $[M + H]^+$  Calcd for  $\text{C}_{17}\text{H}_{14}\text{F}_4\text{NO}$  324.1006; Found 324.1005.

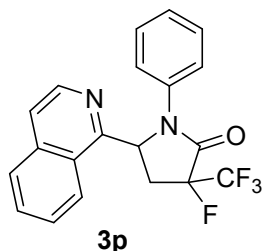

Chemical Formula:  $\text{C}_{20}\text{H}_{14}\text{F}_4\text{N}_2\text{O}$

**3-fluoro-5-(isoquinolin-1-yl)-1-phenyl-3-(trifluoromethyl)pyrrolidin-2-one (3p)**: white solid (mp = 101.4-102.6 °C), 15.9 mg, (Yield: 42%).

$^1\text{H}$  NMR (400 MHz, Chloroform-*d*)  $\delta$  (ppm) = 8.47 (d,  $J$  = 5.6 Hz, 1H), 8.14 (d,  $J$  = 8.4 Hz, 1H), 7.90 – 7.82 (m, 1H), 7.69 (dddd,  $J$  = 21.8, 8.3, 6.9, 1.3 Hz, 2H), 7.59 (d,  $J$  = 5.6 Hz, 1H), 7.37 (d,  $J$  = 8.1 Hz, 2H), 7.17 (dd,  $J$  = 8.6, 7.2 Hz, 2H), 7.09 – 7.01 (m, 1H), 6.20 (q,  $J$  = 6.6, 5.9 Hz, 1H), 3.32 (ddd,  $J$  = 14.9, 11.3, 7.6 Hz, 1H), 2.96 – 2.80 (m, 1H).

$^{13}\text{C}$  NMR (101 MHz, Chloroform-*d*)  $\delta$  (ppm) = 163.1 (d,  $J$  = 22.6 Hz), 155.2, 141.9, 136.7, 136.6, 130.5, 128.8, 128.3, 128.2, 126.7, 126.0, 123.3, 122.5, 122.1 (qd,  $J$  = 283.9, 30.9 Hz), 121.5, 92.1 (dq,  $J$  = 200.5, 34.0 Hz), 58.4, 33.7 (d,  $J$  = 20.9 Hz).

$^{19}\text{F}$  NMR (376 MHz, Chloroform-*d*)  $\delta$  (ppm) = -79.92 (d,  $J$  = 10.7 Hz, 3F), -167.98 (s, 1F).

HRMS (ESI)  $m/z$ :  $[M + H]^+$  Calcd for  $\text{C}_{20}\text{H}_{15}\text{F}_4\text{N}_2\text{O}$  375.1115; Found 375.1114.

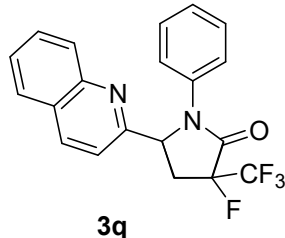

Chemical Formula:  $\text{C}_{20}\text{H}_{14}\text{F}_4\text{N}_2\text{O}$

**3-fluoro-1-phenyl-5-(quinolin-2-yl)-3-(trifluoromethyl)pyrrolidin-2-one (3q)**: brown solid (mp = 151.3-152.1 °C), 27.9 mg, (Yield: 74%).

$^1\text{H}$  NMR (400 MHz, Chloroform-*d*)  $\delta$  (ppm) = 8.13 – 8.02 (m, 2H), 7.80 – 7.69 (m, 2H), 7.58 – 7.48 (m, 3H), 7.31 – 7.21 (m, 3H), 7.14 – 7.06 (m, 1H), 5.62 (ddd,  $J$  = 7.8, 5.8, 3.8 Hz, 1H), 3.34 (td,  $J$  = 14.8, 7.8 Hz, 1H), 2.69 (dddd,  $J$  = 25.7, 15.2, 5.9, 1.3 Hz, 1H).

$^{13}\text{C}$  NMR (101 MHz, Chloroform-*d*)  $\delta$  (ppm) = 163.2 (d,  $J$  = 22.1 Hz), 158.1, 147.7, 138.0, 136.4, 130.3, 129.1, 127.7, 127.5, 127.2, 126.7, 122.6, 121.9 (qd,  $J$  = 283.6, 31.7 Hz), 117.6, 117.6, 92.3 (dq,  $J$  = 199.9, 34.3 Hz), 61.2, 34.2 (d,  $J$  = 20.3 Hz).

$^{19}\text{F}$  NMR (376 MHz, Chloroform-*d*)  $\delta$  (ppm) = -79.77 (d,  $J$  = 10.8 Hz, 3F), -166.55 (q,  $J$  = 10.7 Hz, 1F).

HRMS (ESI)  $m/z$ :  $[M + H]^+$  Calcd for  $\text{C}_{20}\text{H}_{15}\text{F}_4\text{N}_2\text{O}$  375.1115; Found 375.1111.



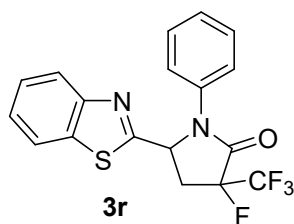

Chemical Formula:  $C_{18}H_{12}F_4N_2OS$

**5-(benzo[d]thiazol-2-yl)-3-fluoro-1-phenyl-3-(trifluoromethyl)pyrrolidin-2-one (3r):** white solid (mp = 140.3-141.2 °C), 21.3 mg, (Yield: 56%).

**$^1H$  NMR** (400 MHz, Chloroform-*d*)  $\delta$  (ppm) = 7.99 (dd,  $J$  = 8.1, 0.9 Hz, 1H), 7.84 – 7.78 (m, 1H), 7.57 – 7.45 (m, 3H), 7.43 – 7.30 (m, 3H), 7.24 – 7.17 (m, 1H), 5.81 (ddd,  $J$  = 8.0, 5.4, 3.6 Hz, 1H), 3.38 (td,  $J$  = 15.2, 7.9 Hz, 1H), 2.85 (dddd,  $J$  = 24.9, 15.3, 5.4, 1.1 Hz, 1H).

**$^{13}C$  NMR** (101 MHz, Chloroform-*d*)  $\delta$  (ppm) = 169.0, 162.6 (d,  $J$  = 22.1 Hz), 152.4, 135.8, 135.0, 129.3, 127.3, 126.6, 126.0, 123.5, 123.0, 122.0, 121.7 (qd,  $J$  = 283.5, 31.6 Hz), 91.7 (dq,  $J$  = 201.9, 34.4 Hz), 57.8, 34.2 (d,  $J$  = 21.1 Hz).

**$^{19}F$  NMR** (376 MHz, Chloroform-*d*)  $\delta$  (ppm) = -79.80 (d,  $J$  = 10.6 Hz, 3F), -166.09 (q,  $J$  = 10.8 Hz, 1F).

**HRMS (ESI) m/z:**  $[M + H]^+$  Calcd for  $C_{18}H_{13}F_4N_2OS$  381.0679; Found 381.0678.

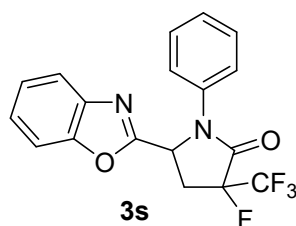

Chemical Formula:

$C_{18}H_{12}F_4N_2O_2$

**5-(benzo[d]oxazol-2-yl)-3-fluoro-1-phenyl-3-(trifluoromethyl)pyrrolidin-2-one (3s):** white solid (mp = 154.7-155.4 °C), 19.0 mg, (Yield: 52%).

**$^1H$  NMR** (400 MHz, Chloroform-*d*)  $\delta$  (ppm) = 7.71 – 7.65 (m, 1H), 7.51 – 7.44 (m, 3H), 7.38 – 7.30 (m, 4H), 7.24 – 7.17 (m, 1H), 5.59 (ddd,  $J$  = 7.9, 5.8, 3.5 Hz, 1H), 3.29 (ddd,  $J$  = 15.1, 13.3, 7.9 Hz, 1H), 3.02 – 2.86 (m, 1H).

**$^{13}C$  NMR** (101 MHz, Chloroform-*d*)  $\delta$  (ppm) = 162.4 (d,  $J$  = 22.2 Hz), 161.3, 150.9, 140.4, 135.7, 129.3, 127.6, 126.2, 125.0, 123.2, 121.7 (qd,  $J$  = 283.7, 31.8 Hz), 120.6, 111.1, 91.3 (dq,  $J$  = 202.2, 34.5 Hz), 53.7, 31.8 (d,  $J$  = 21.7 Hz).

**$^{19}F$  NMR** (376 MHz, Chloroform-*d*)  $\delta$  (ppm) = -79.92 (d,  $J$  = 10.7 Hz, 3F), -168.06 (q,  $J$  = 10.8 Hz, 1F).

**HRMS (ESI) m/z:**  $[M + H]^+$  Calcd for  $C_{18}H_{13}F_4N_2O_2$  365.0908; Found 365.0907.

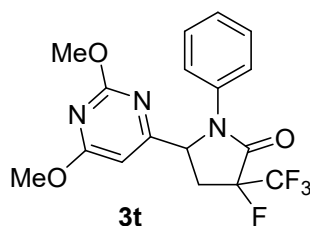

Chemical Formula:  $C_{17}H_{15}F_4N_3O_3$

**5-(2,6-dimethoxypyrimidin-4-yl)-3-fluoro-1-phenyl-3-(trifluoromethyl)pyrrolidin-2-one (3t):** dense yellow oil, 28.2 mg, (Yield: 73%).

**<sup>1</sup>H NMR** (400 MHz, Chloroform-*d*)  $\delta$  (ppm) = 7.50 – 7.43 (m, 2H), 7.34 (t, *J* = 8.0 Hz, 2H), 7.24 – 7.16 (m, 1H), 6.23 (s, 1H), 5.18 (dt, *J* = 8.3, 4.3 Hz, 1H), 3.97 (s, 3H), 3.91 (s, 3H), 3.14 (ddd, *J* = 17.7, 15.2, 8.1 Hz, 1H), 2.71 – 2.54 (m, 1H).

**<sup>13</sup>C NMR** (101 MHz, Chloroform-*d*)  $\delta$  (ppm) = 172.4, 167.9, 165.9, 163.0 (d, *J* = 22.1 Hz), 136.3, 129.2, 126.9, 122.5, 121.7 (qd, *J* = 283.3, 31.7 Hz), 99.5, 92.0 (dq, *J* = 200.4, 34.3 Hz), 59.3, 55.1, 54.1, 33.0 (d, *J* = 21.0 Hz).

**<sup>19</sup>F NMR** (376 MHz, Chloroform-*d*)  $\delta$  (ppm) = -79.94 (d, *J* = 10.3 Hz, 3F), -166.74 (q, *J* = 10.5 Hz, 1F).

**HRMS (ESI) m/z:** [M + H]<sup>+</sup> Calcd for C<sub>17</sub>H<sub>16</sub>F<sub>4</sub>N<sub>3</sub>O<sub>3</sub> 386.1122; Found 386.1121.

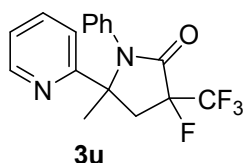

Chemical Formula: C<sub>17</sub>H<sub>14</sub>F<sub>4</sub>N<sub>2</sub>O

**3-fluoro-5-methyl-1-phenyl-5-(pyridin-2-yl)-3-(trifluoromethyl)pyrrolidin-2-one (3u):** yellow solid (mp = 138.4-139.7 °C), 24.4 mg, (Yield: 72%).

**<sup>1</sup>H NMR** (400 MHz, Chloroform-*d*)  $\delta$  (ppm) = 8.69 (ddd, *J* = 4.8, 1.9, 1.0 Hz, 1H), 7.68 (td, *J* = 7.7, 1.8 Hz, 1H), 7.34 (dd, *J* = 8.0, 0.8 Hz, 1H), 7.30 – 7.22 (m, 4H), 6.92 – 6.83 (m, 2H), 3.08 (ddd, *J* = 27.3, 15.8, 1.0 Hz, 1H), 2.73 (dd, *J* = 23.0, 15.7 Hz, 1H), 1.81 (s, 3H).

**<sup>13</sup>C NMR** (101 MHz, Chloroform-*d*)  $\delta$  (ppm) = 163.9 (d, *J* = 22.0 Hz), 161.3, 149.7, 136.8, 134.9, 129.0, 128.1, 127.2, 123.0, 122.0 (qd, *J* = 284.0, 31.7 Hz), 120.4, 92.0 (dq, *J* = 198.4, 33.8 Hz), 65.5, 42.0 (d, *J* = 20.8 Hz), 24.7 (d, *J* = 2.7 Hz).

**<sup>19</sup>F NMR** (376 MHz, Chloroform-*d*)  $\delta$  (ppm) = -79.91 (d, *J* = 10.1 Hz, 3F), -166.69 (q, *J* = 9.7 Hz, 1F).

**HRMS (ESI) m/z:** [M + H]<sup>+</sup> Calcd for C<sub>17</sub>H<sub>15</sub>F<sub>4</sub>N<sub>2</sub>O 339.1115; Found 339.1114.

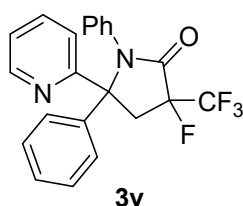

Chemical Formula: C<sub>22</sub>H<sub>16</sub>F<sub>4</sub>N<sub>2</sub>O

**3-fluoro-1,5-diphenyl-5-(pyridin-2-yl)-3-(trifluoromethyl)pyrrolidin-2-one (3v):** dense yellow oil, 30.1 mg, (Yield: 75%).

**<sup>1</sup>H NMR** (400 MHz, Chloroform-*d*)  $\delta$  (ppm) = 8.75 (ddd, *J* = 4.9, 1.8, 0.9 Hz, 1H), 7.59 (td, *J* = 7.8, 1.8 Hz, 1H), 7.32 – 7.24 (m, 6H), 7.23 – 7.18 (m, 1H), 7.14 – 7.03 (m, 5H), 3.91 (dd, *J* = 26.3, 15.5 Hz, 1H), 3.17 (dd, *J* = 25.7, 15.5 Hz, 1H).

**<sup>13</sup>C NMR** (101 MHz, Chloroform-*d*)  $\delta$  (ppm) = 164.4 (d, *J* = 21.9 Hz), 159.5, 149.2, 140.2, 136.3, 136.0, 128.5, 128.4, 128.3, 128.2, 127.1, 126.6, 123.9, 123.0, 121.8 (qd, *J* = 284.8, 31.6 Hz), 92.0 (dq, *J* = 198.1, 34.3 Hz), 73.6, 44.5 (d, *J* = 20.8 Hz).

$^{19}\text{F}$  NMR (376 MHz, Chloroform-*d*)  $\delta$  (ppm) = -79.24 (d,  $J$  = 10.1 Hz, 3F), -167.89 (q,  $J$  = 10.1 Hz, 1F).

HRMS (ESI)  $m/z$ :  $[M + H]^+$  Calcd for  $\text{C}_{22}\text{H}_{17}\text{F}_4\text{N}_2\text{O}$  401.1272; Found 401.1269.

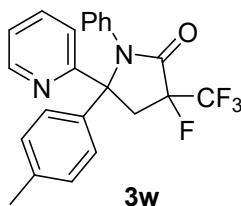

Chemical Formula:  $\text{C}_{23}\text{H}_{18}\text{F}_4\text{N}_2\text{O}$

**3-fluoro-1-phenyl-5-(pyridin-2-yl)-5-(p-tolyl)-3-(trifluoromethyl)pyrrolidin-2-one (3w)**: white solid (mp = 102.0-103.1 °C), 30.3 mg, (Yield: 73%).

$^1\text{H}$  NMR (400 MHz, Chloroform-*d*)  $\delta$  (ppm) = 8.76 – 8.70 (m, 1H), 7.58 (td,  $J$  = 7.8, 1.9 Hz, 1H), 7.27 – 7.23 (m, 1H), 7.20 – 7.03 (m, 10H), 3.87 (dd,  $J$  = 26.4, 15.5 Hz, 1H), 3.15 (dd,  $J$  = 25.7, 15.5 Hz, 1H), 2.30 (s, 3H).

$^{13}\text{C}$  NMR (101 MHz, Chloroform-*d*)  $\delta$  (ppm) = 164.4 (d,  $J$  = 22.3 Hz), 159.7, 149.1, 138.2, 137.2, 136.2, 136.0, 129.1, 128.4, 128.1, 127.1, 126.7, 123.9, 122.9, 121.8 (qd,  $J$  = 282.8, 31.6 Hz), 92.0 (dq,  $J$  = 197.2, 34.2 Hz), 73.5, 44.4 (d,  $J$  = 20.8 Hz), 20.9.

$^{19}\text{F}$  NMR (376 MHz, Chloroform-*d*)  $\delta$  (ppm) = -79.24 (d,  $J$  = 10.0 Hz, 3F), -167.86 (q,  $J$  = 9.9 Hz, 1F).

HRMS (ESI)  $m/z$ :  $[M + H]^+$  Calcd for  $\text{C}_{23}\text{H}_{19}\text{F}_4\text{N}_2\text{O}$  425.1428; Found 425.1427.

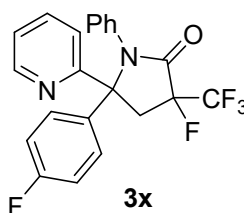

Chemical Formula:  $\text{C}_{22}\text{H}_{15}\text{F}_5\text{N}_2\text{O}$

**3-fluoro-5-(4-fluorophenyl)-1-phenyl-5-(pyridin-2-yl)-3-(trifluoromethyl)pyrrolidin-2-one (3x)**: dense yellow oil, 29.8 mg, (Yield: 71%).

$^1\text{H}$  NMR (400 MHz, Chloroform-*d*)  $\delta$  (ppm) = 8.75 (ddd,  $J$  = 4.8, 1.9, 0.9 Hz, 1H), 7.64 (td,  $J$  = 7.8, 1.9 Hz, 1H), 7.33 – 7.25 (m, 4H), 7.15 – 7.09 (m, 3H), 7.07 – 7.02 (m, 2H), 7.00 – 6.94 (m, 2H), 3.82 (dd,  $J$  = 25.3, 15.5 Hz, 1H), 3.14 (dd,  $J$  = 26.6, 15.5 Hz, 1H).

$^{13}\text{C}$  NMR (101 MHz, Chloroform-*d*)  $\delta$  (ppm) = 164.2 (d,  $J$  = 21.9 Hz), 162.2 (d,  $J$  = 249.1 Hz), 159.5, 149.3, 136.6, 135.7, 130.2 (d,  $J$  = 8.2 Hz), 128.5, 127.1, 126.3, 123.6, 123.1, 121.8 (qd,  $J$  = 282.6, 31.5 Hz), 115.4 (d,  $J$  = 21.7 Hz), 91.9 (dq,  $J$  = 197.8, 34.2 Hz), 73.0, 44.9 (d,  $J$  = 20.6 Hz).

$^{19}\text{F}$  NMR (376 MHz, Chloroform-*d*)  $\delta$  (ppm) = -79.28 (d,  $J$  = 9.7 Hz, 3F), -113.08 (s, 1F), -168.53 (q,  $J$  = 9.9 Hz, 1F).

HRMS (ESI)  $m/z$ :  $[M + H]^+$  Calcd for  $\text{C}_{22}\text{H}_{16}\text{F}_5\text{N}_2\text{O}$  419.1177; Found 419.1175.

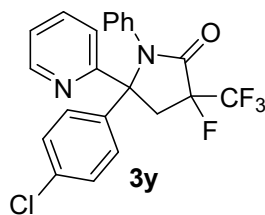

Chemical Formula:  $C_{22}H_{15}ClF_4N_2O$

**5-(4-chlorophenyl)-3-fluoro-1-phenyl-5-(pyridin-2-yl)-3-(trifluoromethyl)pyrrolidin-2-one**

(**3y**): dense colorless oil, 30.9 mg, (Yield: 71%).

$^1H$  NMR (400 MHz, Chloroform-*d*)  $\delta$  (ppm) = 8.75 (ddd,  $J$  = 4.8, 1.8, 0.9 Hz, 1H), 7.62 (td,  $J$  = 7.8, 1.8 Hz, 1H), 7.31 – 7.25 (m, 5H), 7.21 (d,  $J$  = 8.0 Hz, 1H), 7.16 – 7.10 (m, 3H), 7.07 – 7.01 (m, 2H), 3.88 (dd,  $J$  = 25.8, 15.5 Hz, 1H), 3.09 (dd,  $J$  = 25.6, 15.5 Hz, 1H).

$^{13}C$  NMR (101 MHz, Chloroform-*d*)  $\delta$  (ppm) = 164.2 (d,  $J$  = 21.9 Hz), 159.1, 149.3, 138.7, 136.6, 135.7, 134.3, 129.6, 128.6, 128.6, 127.2, 126.3, 123.7, 123.2, 121.7 (qd,  $J$  = 282.6, 31.4 Hz), 91.8 (dq,  $J$  = 197.8, 34.3 Hz), 73.0, 44.7 (d,  $J$  = 20.8 Hz).

$^{19}F$  NMR (376 MHz, Chloroform-*d*)  $\delta$  (ppm) = -79.25 (d,  $J$  = 10.1 Hz, 3F), -168.13 (q,  $J$  = 10.1 Hz, 1F).

HRMS (ESI)  $m/z$ :  $[M + H]^+$  Calcd for  $C_{22}H_{16}ClF_4N_2O$  435.0882; Found 435.0878.

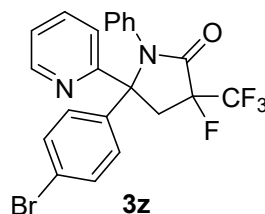

Chemical Formula:  $C_{22}H_{15}BrF_4N_2O$

**5-(4-bromophenyl)-3-fluoro-1-phenyl-5-(pyridin-2-yl)-3-(trifluoromethyl)pyrrolidin-2-one**

(**3z**): white solid (mp = 107.6-108.5 °C), 31.8 mg, (Yield: 66%).

$^1H$  NMR (400 MHz, Chloroform-*d*)  $\delta$  (ppm) = 8.75 (ddd,  $J$  = 4.8, 1.8, 0.9 Hz, 1H), 7.61 (td,  $J$  = 7.8, 1.9 Hz, 1H), 7.46 – 7.40 (m, 2H), 7.29 (ddd,  $J$  = 7.6, 4.8, 1.0 Hz, 1H), 7.23 – 7.17 (m, 3H), 7.16 – 7.10 (m, 3H), 7.07 – 7.00 (m, 2H), 3.89 (dd,  $J$  = 26.0, 15.5 Hz, 1H), 3.08 (dd,  $J$  = 25.3, 15.5 Hz, 1H).

$^{13}C$  NMR (101 MHz, Chloroform-*d*)  $\delta$  (ppm) = 164.3 (d,  $J$  = 22.1 Hz), 159.0, 149.3, 139.4, 136.5, 135.7, 131.6, 129.9, 128.6, 127.2, 126.3, 123.8, 123.2, 122.5, 121.7 (qd,  $J$  = 282.7, 31.4 Hz), 91.8 (dq,  $J$  = 197.8, 34.3 Hz), 73.1, 44.6 (d,  $J$  = 20.9 Hz).

$^{19}F$  NMR (376 MHz, Chloroform-*d*)  $\delta$  (ppm) = -79.25 (d,  $J$  = 9.8 Hz, 3F), -168.01 (q,  $J$  = 10.1 Hz, 1F).

HRMS (ESI)  $m/z$ :  $[M + H]^+$  Calcd for  $C_{22}H_{16}BrF_4N_2O$  479.0377; Found 479.0375.

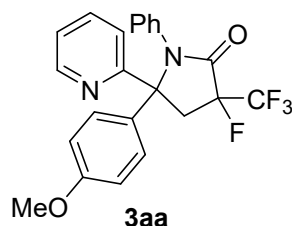

Chemical Formula:  $C_{23}H_{18}F_4N_2O_2$

**3-fluoro-5-(4-methoxyphenyl)-1-phenyl-5-(pyridin-2-yl)-3-(trifluoromethyl)pyrrolidin-2-one**

(**3aa**): dense brown oil, 33.3 mg, (Yield: 77%).

<sup>1</sup>H NMR (400 MHz, Chloroform-*d*) δ (ppm) = 8.73 (ddd, *J* = 4.8, 1.9, 0.9 Hz, 1H), 7.61 (td, *J* = 7.8, 1.8 Hz, 1H), 7.29 – 7.22 (m, 2H), 7.19 – 7.04 (m, 7H), 6.83 – 6.77 (m, 2H), 3.84 – 3.73 (m, 4H), 3.17 (dd, *J* = 26.9, 15.5 Hz, 1H).

<sup>13</sup>C NMR (101 MHz, Chloroform-*d*) δ (ppm) = 164.2 (d, *J* = 21.7 Hz), 160.0, 159.3, 149.1, 136.4, 136.0, 131.7, 131.7, 129.6, 128.4, 127.0, 126.6, 123.6, 122.9, 121.8 (qd, *J* = 284.0, 31.2 Hz), 113.7, 92.0 (dq, *J* = 197.4, 34.1 Hz), 55.2, 44.5 (d, *J* = 20.6 Hz).

<sup>19</sup>F NMR (376 MHz, Chloroform-*d*) δ (ppm) = -79.25 (d, *J* = 9.9 Hz, 3F), -168.47 (q, *J* = 10.0 Hz, 1F).

HRMS (ESI) *m/z*: [M + H]<sup>+</sup> Calcd for C<sub>23</sub>H<sub>19</sub>F<sub>4</sub>N<sub>2</sub>O<sub>2</sub> 434.1377; Found 434.1374.

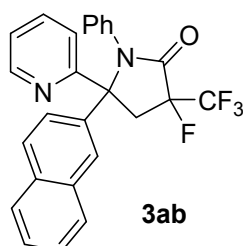

Chemical Formula: C<sub>26</sub>H<sub>18</sub>F<sub>4</sub>N<sub>2</sub>O

**3-fluoro-5-(naphthalen-2-yl)-1-phenyl-5-(pyridin-2-yl)-3-(trifluoromethyl)pyrrolidin-2-one**

(**3ab**): brown solid (mp = 248.5-249.3 °C), 15.6 mg, (Yield: 34%).

<sup>1</sup>H NMR (400 MHz, Chloroform-*d*) δ (ppm) = 8.77 – 8.68 (m, 1H), 8.06 (d, *J* = 7.3 Hz, 1H), 7.96 – 7.87 (m, 2H), 7.57 (t, *J* = 7.8 Hz, 1H), 7.46 – 7.39 (m, 1H), 7.25 – 7.19 (m, 1H), 7.17 – 7.00 (m, 8H), 6.49 (d, *J* = 7.5 Hz, 1H), 4.85 (dd, *J* = 34.4, 15.1 Hz, 1H), 3.32 (dd, *J* = 15.0, 9.5 Hz, 1H).

<sup>13</sup>C NMR (101 MHz, Chloroform-*d*) δ (ppm) = 165.6 (d, *J* = 22.7 Hz), 157.8, 149.3, 137.5, 136.5, 135.5, 134.9, 129.9, 129.6, 129.6, 128.5, 127.8, 127.6, 126.5, 126.0, 125.9, 125.6, 124.4, 123.1, 121.5 (qd, *J* = 284.3, 32.8 Hz), 92.1 (dq, *J* = 194.9, 33.5 Hz), 74.4 (d, *J* = 3.0 Hz), 41.4 (d, *J* = 22.0 Hz).

<sup>19</sup>F NMR (376 MHz, Chloroform-*d*) δ (ppm) = -78.82 (d, *J* = 11.5 Hz, 3F), -161.79 (s, 1F).

HRMS (ESI) *m/z*: [M + H]<sup>+</sup> Calcd for C<sub>26</sub>H<sub>19</sub>F<sub>4</sub>N<sub>2</sub>O 451.1428; Found 451.1425.

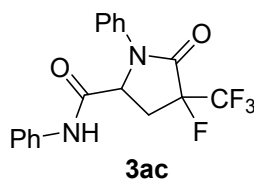

Chemical Formula: C<sub>18</sub>H<sub>14</sub>F<sub>4</sub>N<sub>2</sub>O<sub>2</sub>

**4-fluoro-5-oxo-N,1-diphenyl-4-(trifluoromethyl)pyrrolidine-2-carboxamide** (**3ac**): dense yellow oil, 18.7 mg, (Yield: 51%).

<sup>1</sup>H NMR (400 MHz, Acetone-*d*<sub>6</sub>) δ (ppm) = 9.76 (s, 1H), 7.67 – 7.60 (m, 2H), 7.61 – 7.54 (m, 2H), 7.48 – 7.38 (m, 2H), 7.32 – 7.24 (m, 3H), 7.14 – 7.05 (m, 1H), 5.20 (dt, *J* = 8.2, 4.1 Hz, 1H), 3.33 (ddd, *J* = 19.8, 15.4, 8.2 Hz, 1H), 2.88 – 2.74 (m, 1H).

<sup>13</sup>C NMR (101 MHz, Acetone-*d*<sub>6</sub>) δ (ppm) = 167.8, 163.5 (d, *J* = 22.4 Hz), 139.1, 138.0, 129.9, 129.6, 127.7, 125.1, 124.6, 124.3, 123.5, 121.8, 121.5, 120.4, 94.2, 93.8, 92.2, 91.8, 59.6, 31.2 (d, *J* = 21.5 Hz).

<sup>19</sup>F NMR (376 MHz, Acetone-*d*<sub>6</sub>) δ (ppm) = -80.67 (d, *J* = 10.1 Hz, 3F), -167.55 (q, *J* = 10.1 Hz, 1F).

HRMS (ESI) *m/z*: [M + H]<sup>+</sup> Calcd for C<sub>18</sub>H<sub>15</sub>F<sub>4</sub>N<sub>2</sub>O<sub>2</sub> 367.1064; Found 367.1061.

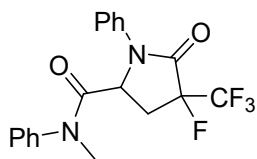

**3ad**

Chemical Formula: C<sub>19</sub>H<sub>16</sub>F<sub>4</sub>N<sub>2</sub>O<sub>2</sub>

**4-fluoro-N-methyl-5-oxo-N,1-diphenyl-4-(trifluoromethyl)pyrrolidine-2-carboxamide (3ad):** dense yellow oil, 22.4 mg, (Yield: 59%).

<sup>1</sup>H NMR (400 MHz, Chloroform-*d*) δ (ppm) = 7.55 – 7.47 (m, 3H), 7.46 – 7.39 (m, 2H), 7.35 – 7.27 (m, 3H), 7.06 (dd, *J* = 8.0, 1.6 Hz, 2H), 4.62 (ddd, *J* = 7.9, 5.3, 4.1 Hz, 1H), 3.21 (s, 3H), 2.76 – 2.54 (m, 2H).

<sup>13</sup>C NMR (101 MHz, Chloroform-*d*) δ (ppm) = 168.0, 162.7 (d, *J* = 22.4 Hz), 141.7, 136.2, 130.5, 129.2, 129.2, 127.6, 126.9, 123.6, 123.3, 122.9, 120.4, 120.1, 92.5, 92.2, 90.5, 90.2, 54.8, 38.0, 30.6 (d, *J* = 21.8 Hz).

<sup>19</sup>F NMR (376 MHz, Chloroform-*d*) δ (ppm) = -80.25 (d, *J* = 10.8 Hz, 3F), -167.30 (q, *J* = 10.8 Hz, 1F).

HRMS (ESI) *m/z*: [M + H]<sup>+</sup> Calcd for C<sub>19</sub>H<sub>17</sub>F<sub>4</sub>N<sub>2</sub>O<sub>2</sub> 381.1221; Found 381.1220.

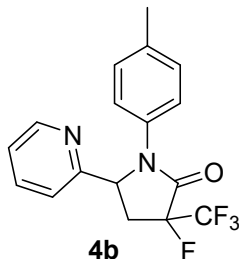

**4b**

Chemical Formula: C<sub>17</sub>H<sub>14</sub>F<sub>4</sub>N<sub>2</sub>O

**3-fluoro-5-(pyridin-2-yl)-1-(p-tolyl)-3-(trifluoromethyl)pyrrolidin-2-one (4b):** yellow solid (mp = 85.6-86.8 °C), 26.2 mg, (Yield: 77%).

<sup>1</sup>H NMR (400 MHz, Chloroform-*d*) δ (ppm) = 8.62 – 8.54 (m, 1H), 7.60 (td, *J* = 7.7, 1.8 Hz, 1H), 7.29 (d, *J* = 8.5 Hz, 2H), 7.22 – 7.12 (m, 2H), 7.07 (d, *J* = 8.2 Hz, 2H), 5.35 (ddd, *J* = 7.8, 5.6, 4.0 Hz, 1H), 3.20 (td, *J* = 14.9, 7.7 Hz, 1H), 2.68 (dddd, *J* = 25.8, 15.1, 5.7, 1.3 Hz, 1H), 2.25 (s, 3H).

<sup>13</sup>C NMR (101 MHz, Chloroform-*d*) δ (ppm) = 163.1 (d, *J* = 22.0 Hz), 157.7, 150.0, 137.2, 136.7, 133.8, 129.6, 123.4, 122.8, 121.9 (qd, *J* = 284.5, 32.1 Hz), 121.4, 92.3 (dq, *J* = 199.6, 34.2 Hz), 60.7, 34.0 (d, *J* = 20.5 Hz), 20.9.

<sup>19</sup>F NMR (376 MHz, Chloroform-*d*) δ (ppm) = -79.90 (d, *J* = 10.8 Hz, 3F), -167.06 (q, *J* = 10.8 Hz, 1F).

HRMS (ESI) *m/z*: [M + H]<sup>+</sup> Calcd for C<sub>17</sub>H<sub>15</sub>F<sub>4</sub>N<sub>2</sub>O 339.1115; Found 339.1112.

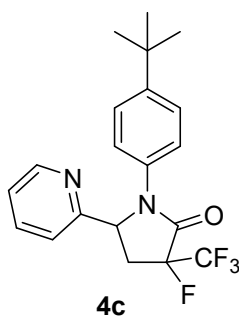

Chemical Formula: C<sub>20</sub>H<sub>20</sub>F<sub>4</sub>N<sub>2</sub>O

**1-(4-(tert-butyl)phenyl)-3-fluoro-5-(pyridin-2-yl)-3-(trifluoromethyl)pyrrolidin-2-one (4c):** white solid (mp = 121.9-123.4 °C), 28.3 mg, (Yield: 74%).

**<sup>1</sup>H NMR** (400 MHz, Chloroform-*d*) δ (ppm) = 8.59 (ddd, *J* = 4.8, 1.7, 0.9 Hz, 1H), 7.62 (td, *J* = 7.7, 1.8 Hz, 1H), 7.39 – 7.33 (m, 2H), 7.33 – 7.27 (m, 2H), 7.23 – 7.16 (m, 2H), 5.39 (ddd, *J* = 7.9, 5.2, 3.8 Hz, 1H), 3.20 (ddd, *J* = 16.0, 15.1, 7.8 Hz, 1H), 2.66 (dddd, *J* = 25.4, 15.1, 5.2, 1.2 Hz, 1H), 1.24 (s, 9H).

**<sup>13</sup>C NMR** (101 MHz, Chloroform-*d*) δ (ppm) = 163.1 (d, *J* = 22.1 Hz), 157.9, 150.0, 149.7, 137.3, 133.7, 125.9, 123.4, 122.2, 121.9 (qd, *J* = 284.8, 31.9 Hz), 121.2, 92.4 (dq, *J* = 199.5, 34.1 Hz), 60.6, 34.4, 34.1 (d, *J* = 20.5 Hz), 31.1.

**<sup>19</sup>F NMR** (376 MHz, Chloroform-*d*) δ (ppm) = -79.89 (d, *J* = 10.6 Hz, 3F), -166.98 (q, *J* = 10.9 Hz, 1F).

**HRMS (ESI) m/z:** [M + H]<sup>+</sup> Calcd for C<sub>20</sub>H<sub>21</sub>F<sub>4</sub>N<sub>2</sub>O 351.1585; Found 351.1581.

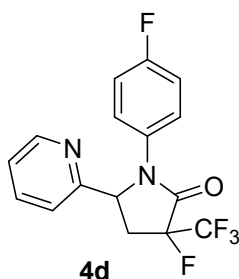

Chemical Formula: C<sub>16</sub>H<sub>11</sub>F<sub>5</sub>N<sub>2</sub>O

**3-fluoro-1-(4-fluorophenyl)-5-(pyridin-2-yl)-3-(trifluoromethyl)pyrrolidin-2-one (4d):** white solid (mp = 88.4-89.1 °C), 25.8 mg, (Yield: 75%).

**<sup>1</sup>H NMR** (400 MHz, Chloroform-*d*) δ (ppm) = 8.62 – 8.54 (m, 1H), 7.62 (td, *J* = 7.7, 1.8 Hz, 1H), 7.40 – 7.33 (m, 2H), 7.22 (ddd, *J* = 7.6, 4.8, 1.1 Hz, 1H), 7.16 (d, *J* = 7.8 Hz, 1H), 7.00 – 6.93 (m, 2H), 5.32 (ddd, *J* = 7.6, 6.0, 3.9 Hz, 1H), 3.22 (ddd, *J* = 15.0, 12.9, 7.6 Hz, 1H), 2.74 (dddd, *J* = 25.9, 15.1, 5.9, 1.2 Hz, 1H).

**<sup>13</sup>C NMR** (101 MHz, Chloroform-*d*) δ (ppm) = 163.2 (d, *J* = 22.4 Hz), 160.7 (d, *J* = 247.5 Hz), 156.9, 150.2, 137.3, 132.2 (d, *J* = 3.1 Hz), 125.1 (d, *J* = 8.4 Hz), 123.7, 121.9 (qd, *J* = 283.6, 31.9 Hz), 121.7, 115.9 (d, *J* = 22.8 Hz), 92.2 (dq, *J* = 200.3, 34.2 Hz), 60.8, 34.0 (d, *J* = 20.5 Hz).

**<sup>19</sup>F NMR** (376 MHz, Chloroform-*d*) δ (ppm) = -79.92 (d, *J* = 10.7 Hz, 3F), -114.00 (s, 1F), -167.48 (q, *J* = 10.7 Hz, 1F).

**HRMS (ESI) m/z:** [M + H]<sup>+</sup> Calcd for C<sub>16</sub>H<sub>12</sub>F<sub>5</sub>N<sub>2</sub>O 343.0864; Found 343.0863.

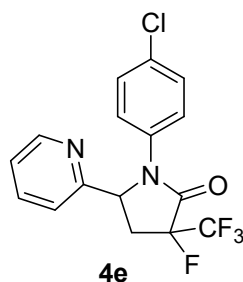

Chemical Formula: C<sub>16</sub>H<sub>11</sub>ClF<sub>4</sub>N<sub>2</sub>O

**1-(4-chlorophenyl)-3-fluoro-5-(pyridin-2-yl)-3-(trifluoromethyl)pyrrolidin-2-one (4e):** white solid (mp = 112.4-113.2 °C), 24.9 mg, (Yield: 69%).

**<sup>1</sup>H NMR** (400 MHz, Chloroform-*d*) δ (ppm) = 8.61 – 8.55 (m, 1H), 7.63 (td, *J* = 7.7, 1.8 Hz, 1H), 7.41 – 7.35 (m, 2H), 7.27 – 7.19 (m, 3H), 7.15 (d, *J* = 7.8 Hz, 1H), 5.35 (ddd, *J* = 7.7, 5.7, 3.8 Hz, 1H), 3.22 (td, *J* = 14.6, 7.7 Hz, 1H), 2.70 (dddd, *J* = 25.7, 15.0, 5.7, 1.2 Hz, 1H).

**<sup>13</sup>C NMR** (101 MHz, Chloroform-*d*) δ (ppm) = 163.1 (d, *J* = 22.4 Hz), 157.1, 150.2, 137.3, 134.9, 132.2, 129.2, 124.1, 123.7, 121.8 (qd, *J* = 283.5, 31.8 Hz), 121.4, 92.2 (dq, *J* = 200.3, 34.3 Hz), 60.6, 34.0 (d, *J* = 20.5 Hz).

**<sup>19</sup>F NMR** (376 MHz, Chloroform-*d*) δ (ppm) = -79.88 (d, *J* = 10.4 Hz, 3F), -167.19 (q, *J* = 10.7 Hz, 1F).

**HRMS (ESI) m/z:** [M + H]<sup>+</sup> Calcd for C<sub>16</sub>H<sub>12</sub>ClF<sub>4</sub>N<sub>2</sub>O 359.0569; Found 359.0568.

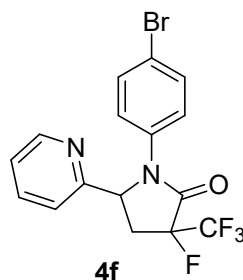

Chemical Formula: C<sub>16</sub>H<sub>11</sub>BrF<sub>4</sub>N<sub>2</sub>O

**1-(4-bromophenyl)-3-fluoro-5-(pyridin-2-yl)-3-(trifluoromethyl)pyrrolidin-2-one (4f):** white solid (mp = 115.6-116.8 °C), 22.7 mg, (Yield: 56%).

**<sup>1</sup>H NMR** (400 MHz, Chloroform-*d*) δ (ppm) = 8.58 (ddd, *J* = 4.8, 1.8, 0.9 Hz, 1H), 7.63 (td, *J* = 7.7, 1.7 Hz, 1H), 7.43 – 7.37 (m, 2H), 7.36 – 7.30 (m, 2H), 7.22 (ddd, *J* = 7.6, 4.8, 1.1 Hz, 1H), 7.16 (d, *J* = 7.8 Hz, 1H), 5.35 (ddd, *J* = 7.8, 5.7, 3.8 Hz, 1H), 3.22 (ddd, *J* = 15.1, 14.2, 7.7 Hz, 1H), 2.69 (dddd, *J* = 25.6, 15.1, 5.7, 1.3 Hz, 1H).

**<sup>13</sup>C NMR** (101 MHz, Chloroform-*d*) δ (ppm) = 163.1 (d, *J* = 22.4 Hz), 157.0, 150.2, 137.4, 135.4, 132.1, 124.3, 123.7, 121.8 (qd, *J* = 283.6, 31.8 Hz), 121.4, 120.0, 92.2 (dq, *J* = 200.4, 34.3 Hz), 60.5, 34.0 (d, *J* = 20.5 Hz).

**<sup>19</sup>F NMR** (376 MHz, Chloroform-*d*) δ (ppm) = -79.86 (d, *J* = 10.8 Hz, 3F), -167.17 (q, *J* = 10.8 Hz, 1F).

**HRMS (ESI) m/z:** [M + H]<sup>+</sup> Calcd for C<sub>16</sub>H<sub>12</sub>BrF<sub>4</sub>N<sub>2</sub>O 403.0064; Found 403.0062.



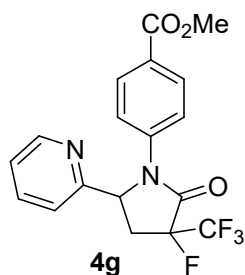

Chemical Formula:  $C_{18}H_{14}F_4N_2O_3$

**methyl 4-(3-fluoro-2-oxo-5-(pyridin-2-yl)-3-(trifluoromethyl)pyrrolidin-1-yl)benzoate (4g):**  
white solid (mp = 149.9-150.6 °C), 25.1 mg, (Yield: 65%).

$^1H$  NMR (400 MHz, Chloroform-*d*)  $\delta$  (ppm) = 8.60 – 8.54 (m, 1H), 8.00 – 7.92 (m, 2H), 7.67 – 7.55 (m, 3H), 7.21 (ddd,  $J$  = 7.6, 4.8, 1.1 Hz, 1H), 7.17 (d,  $J$  = 7.9 Hz, 1H), 5.46 (ddd,  $J$  = 7.8, 5.4, 3.5 Hz, 1H), 3.87 (s, 3H), 3.24 (td,  $J$  = 15.3, 7.8 Hz, 1H), 2.76 – 2.61 (m, 1H).

$^{13}C$  NMR (101 MHz, Chloroform-*d*)  $\delta$  (ppm) = 166.1, 163.3 (d,  $J$  = 22.6 Hz), 157.2, 150.2, 140.3, 137.4, 130.5, 127.9, 123.6, 121.8, 121.7 (qd,  $J$  = 284.4, 31.6 Hz), 121.1, 92.3 (dq,  $J$  = 201.0, 34.3 Hz), 60.4, 52.2, 34.1 (d,  $J$  = 20.4 Hz).

$^{19}F$  NMR (376 MHz, Chloroform-*d*)  $\delta$  (ppm) = -79.83 (d,  $J$  = 10.5 Hz, 3F), -166.95 (q,  $J$  = 10.9 Hz, 1F).

**HRMS (ESI)  $m/z$ :**  $[M + H]^+$  Calcd for  $C_{18}H_{15}F_4N_2O_3$  383.1013; Found 383.1011.

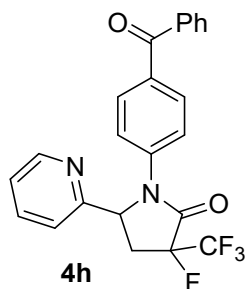

Chemical Formula:  $C_{23}H_{16}F_4N_2O_2$

**1-(4-benzoylphenyl)-3-fluoro-5-(pyridin-2-yl)-3-(trifluoromethyl)pyrrolidin-2-one (4h):**  
brown solid (mp = 129.5-130.3 °C), 24.6 mg, (Yield: 57%).

$^1H$  NMR (400 MHz, Chloroform-*d*)  $\delta$  (ppm) = 8.59 (ddd,  $J$  = 4.8, 1.8, 0.9 Hz, 1H), 7.78 – 7.70 (m, 4H), 7.65 – 7.54 (m, 4H), 7.49 – 7.43 (m, 2H), 7.25 – 7.17 (m, 2H), 5.48 (ddd,  $J$  = 7.8, 5.6, 3.5 Hz, 1H), 3.26 (td,  $J$  = 15.1, 7.8 Hz, 1H), 2.70 (dddd,  $J$  = 25.5, 15.3, 5.6, 1.3 Hz, 1H).

$^{13}C$  NMR (101 MHz, Chloroform-*d*)  $\delta$  (ppm) = 195.4, 163.4 (d,  $J$  = 22.1 Hz), 157.2, 150.3, 139.9, 137.5, 137.2, 135.2, 132.6, 131.0, 129.9, 128.3, 123.7, 121.8, 121.1, 118.9 (qd,  $J$  = 283.8, 32.1 Hz), 92.3 (dq,  $J$  = 201.3, 34.4 Hz), 60.4, 34.1 (d,  $J$  = 20.4 Hz).

$^{19}F$  NMR (376 MHz, Chloroform-*d*)  $\delta$  (ppm) = -79.80 (d,  $J$  = 10.5 Hz, 3F), -167.01 (q,  $J$  = 10.7 Hz, 1F).

**HRMS (ESI)  $m/z$ :**  $[M + H]^+$  Calcd for  $C_{23}H_{17}F_4N_2O_2$  429.1221; Found 429.1214.

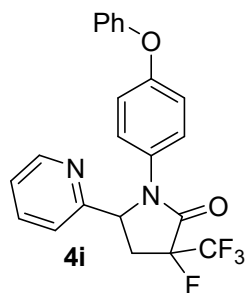

Chemical Formula:  $C_{22}H_{16}F_4N_2O_2$

**3-fluoro-1-(4-phenoxyphenyl)-5-(pyridin-2-yl)-3-(trifluoromethyl)pyrrolidin-2-one (4i):** yellow solid (mp = 109.4-110.2 °C), 32.3 mg, (Yield: 77%).

**$^1H$  NMR** (400 MHz, Chloroform-*d*)  $\delta$  (ppm) = 8.64 – 8.54 (m, 1H), 7.62 (td,  $J$  = 7.7, 1.8 Hz, 1H), 7.36 – 7.27 (m, 4H), 7.23 – 7.15 (m, 2H), 7.10 (t,  $J$  = 7.4 Hz, 1H), 6.93 (d,  $J$  = 8.0 Hz, 2H), 6.88 (d,  $J$  = 9.0 Hz, 2H), 5.32 (ddd,  $J$  = 7.7, 5.7, 4.0 Hz, 1H), 3.20 (td,  $J$  = 14.4, 7.6 Hz, 1H), 2.72 (ddd,  $J$  = 25.8, 15.0, 5.8 Hz, 1H).

**$^{13}C$  NMR** (101 MHz, Chloroform-*d*)  $\delta$  (ppm) = 163.1 (d,  $J$  = 22.3 Hz), 157.3, 156.4, 155.8, 150.1, 137.2, 131.2, 129.8, 124.7, 123.8, 123.6, 121.9 (qd,  $J$  = 284.6, 31.8 Hz), 121.6, 119.2, 118.7, 92.2 (dq,  $J$  = 200.1, 34.3 Hz), 60.9, 34.0 (d,  $J$  = 20.4 Hz).

**$^{19}F$  NMR** (376 MHz, Chloroform-*d*)  $\delta$  (ppm) = -79.88 (d,  $J$  = 10.8 Hz, 3F), -167.23 (q,  $J$  = 10.9 Hz, 1F).

**HRMS (ESI) m/z:**  $[M + H]^+$  Calcd for  $C_{22}H_{17}F_4N_2O_2$  417.1221; Found 417.1216.

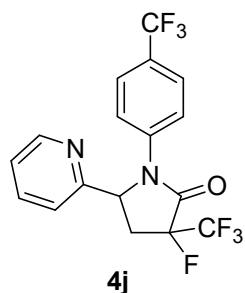

Chemical Formula:  $C_{17}H_{11}F_7N_2O$

**3-fluoro-5-(pyridin-2-yl)-3-(trifluoromethyl)-1-(4-(trifluoromethyl)phenyl)pyrrolidin-2-one (4j):** white solid (mp = 100.5-101.6 °C), 21.7 mg, (Yield: 55%).

**$^1H$  NMR** (400 MHz, Chloroform-*d*)  $\delta$  (ppm) = 8.59 (dt,  $J$  = 4.9, 1.4 Hz, 1H), 7.68 – 7.60 (m, 3H), 7.55 (d,  $J$  = 8.9 Hz, 2H), 7.23 (ddd,  $J$  = 7.6, 4.8, 1.1 Hz, 1H), 7.18 (d,  $J$  = 7.9 Hz, 1H), 5.44 (ddd,  $J$  = 7.9, 5.6, 3.6 Hz, 1H), 3.25 (td,  $J$  = 15.1, 7.8 Hz, 1H), 2.69 (dddd,  $J$  = 25.3, 15.1, 5.6, 1.3 Hz, 1H).

**$^{13}C$  NMR** (101 MHz, Chloroform-*d*)  $\delta$  (ppm) = 163.4 (d,  $J$  = 22.2 Hz), 157.0, 150.3, 139.4, 137.5, 128.3 (q,  $J$  = 33.1 Hz), 126.2 (q,  $J$  = 3.7 Hz), 123.6 (q,  $J$  = 272.0 Hz), 123.7, 122.3, 121.7 (qd,  $J$  = 283.4, 31.5 Hz), 121.1, 92.2 (dq,  $J$  = 200.5, 34.3 Hz), 60.4, 34.1 (d,  $J$  = 20.5 Hz).

**$^{19}F$  NMR** (376 MHz, Chloroform-*d*)  $\delta$  (ppm) = -62.62 (s, 3F), -79.85 (d,  $J$  = 10.2 Hz, 3F), -167.14 (q,  $J$  = 10.3 Hz, 1F).

**HRMS (ESI) m/z:**  $[M + H]^+$  Calcd for  $C_{17}H_{12}F_7N_2O$  393.0832; Found 393.0827.

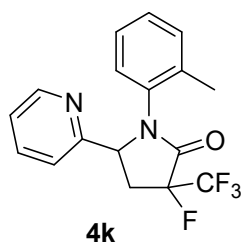

Chemical Formula: C<sub>17</sub>H<sub>14</sub>F<sub>4</sub>N<sub>2</sub>O

**3-fluoro-5-(pyridin-2-yl)-1-(o-tolyl)-3-(trifluoromethyl)pyrrolidin-2-one (4k):** yellow solid (mp = 105.2-106.0 °C), 19.6 mg, (Yield: 57%).

**<sup>1</sup>H NMR** (400 MHz, Chloroform-*d*) δ (ppm) = 8.65 – 8.56 (m, 1H), 7.52 (td, *J* = 7.6, 1.8 Hz, 1H), 7.19 (ddd, *J* = 7.7, 4.8, 1.1 Hz, 1H), 7.15 – 7.08 (m, 2H), 7.03 (d, *J* = 7.7 Hz, 2H), 6.85 (d, *J* = 8.0 Hz, 1H), 5.09 (td, *J* = 6.9, 4.4 Hz, 1H), 3.27 – 3.11 (m, 2H), 2.17 (s, 3H).

**<sup>13</sup>C NMR** (101 MHz, Chloroform-*d*) δ (ppm) = 162.8 (d, *J* = 22.3 Hz), 155.3, 150.1, 136.7, 136.1, 134.3, 131.2, 128.6, 126.4, 123.9, 123.7, 122.3 (qd, *J* = 284.9, 32.2 Hz), 91.8 (dq, *J* = 200.4, 34.0 Hz), 61.4, 33.2 (d, *J* = 20.9 Hz), 17.8.

**<sup>19</sup>F NMR** (376 MHz, Chloroform-*d*) δ (ppm) = -79.97 (d, *J* = 11.2 Hz, 3F), -168.19 (q, *J* = 11.0 Hz, 1F).

**HRMS (ESI) m/z:** [M + H]<sup>+</sup> Calcd for C<sub>17</sub>H<sub>15</sub>F<sub>4</sub>N<sub>2</sub>O<sub>2</sub> 339.1115; Found 339.1116.

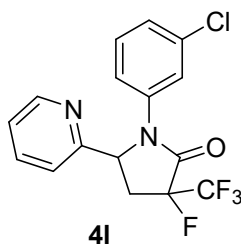

Chemical Formula: C<sub>16</sub>H<sub>11</sub>ClF<sub>4</sub>N<sub>2</sub>O

**1-(3-chlorophenyl)-3-fluoro-5-(pyridin-2-yl)-3-(trifluoromethyl)pyrrolidin-2-one (4l):** white solid (mp = 101.4-102.2 °C), 26.8 mg, (Yield: 74%).

**<sup>1</sup>H NMR** (400 MHz, Chloroform-*d*) δ (ppm) = 8.62 – 8.55 (m, 1H), 7.64 (td, *J* = 7.7, 1.8 Hz, 1H), 7.57 (t, *J* = 2.0 Hz, 1H), 7.29 – 7.11 (m, 5H), 5.37 (ddd, *J* = 7.8, 5.7, 3.7 Hz, 1H), 3.22 (td, *J* = 14.8, 7.7 Hz, 1H), 2.70 (dddd, *J* = 25.4, 15.0, 5.6, 1.3 Hz, 1H).

**<sup>13</sup>C NMR** (101 MHz, Chloroform-*d*) δ (ppm) = 163.2 (d, *J* = 22.5 Hz), 157.0, 150.3, 137.42, 137.37, 134.7, 130.0, 126.8, 123.7, 123.0, 121.8 (qd, *J* = 284.5, 31.8 Hz), 121.3, 120.7, 92.2 (dq, *J* = 200.3, 34.3 Hz), 60.5, 34.0 (d, *J* = 20.4 Hz).

**<sup>19</sup>F NMR** (376 MHz, Chloroform-*d*) δ (ppm) = -79.87 (d, *J* = 10.4 Hz, 3F), -167.24 (q, *J* = 10.8 Hz, 1F).

**HRMS (ESI) m/z:** [M + H]<sup>+</sup> Calcd for C<sub>16</sub>H<sub>12</sub>ClF<sub>4</sub>N<sub>2</sub>O 359.0569; Found 359.0562.

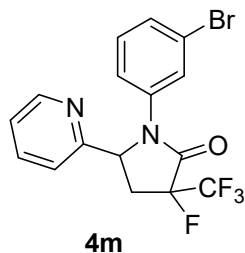

Chemical Formula: C<sub>16</sub>H<sub>11</sub>BrF<sub>4</sub>N<sub>2</sub>O

**1-(3-bromophenyl)-3-fluoro-5-(pyridin-2-yl)-3-(trifluoromethyl)pyrrolidin-2-one (4m):**  
yellow solid (mp = 80.5-81.6 °C), 23.7 mg, (Yield: 58%).

**<sup>1</sup>H NMR** (400 MHz, Chloroform-*d*) δ (ppm) = 8.62 – 8.56 (m, 1H), 7.72 (t, *J* = 2.0 Hz, 1H), 7.64 (td, *J* = 7.8, 1.8 Hz, 1H), 7.33 – 7.27 (m, 2H), 7.22 (ddd, *J* = 7.7, 4.8, 1.1 Hz, 1H), 7.19 – 7.11 (m, 2H), 5.36 (ddd, *J* = 7.8, 5.6, 3.7 Hz, 1H), 3.21 (td, *J* = 14.8, 7.7 Hz, 1H), 2.70 (dddd, *J* = 25.6, 15.1, 5.6, 1.2 Hz, 1H).

**<sup>13</sup>C NMR** (101 MHz, Chloroform-*d*) δ (ppm) = 163.2 (d, *J* = 22.4 Hz), 157.0, 150.3, 137.6, 137.4, 130.2, 129.8, 125.9, 123.7, 122.6, 121.8 (qd, *J* = 283.5, 31.7 Hz), 121.3, 121.2, 92.2 (dq, *J* = 200.5, 34.3 Hz), 60.5, 34.0 (d, *J* = 20.5 Hz).

**<sup>19</sup>F NMR** (376 MHz, Chloroform-*d*) δ (ppm) = -79.87 (d, *J* = 10.8 Hz, 3F), -167.20 (q, *J* = 10.7 Hz, 1F).

**HRMS (ESI) m/z:** [M + H]<sup>+</sup> Calcd for C<sub>16</sub>H<sub>12</sub>BrF<sub>4</sub>N<sub>2</sub>O 403.0064; Found 403.0060.

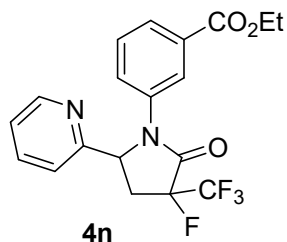

Chemical Formula: C<sub>19</sub>H<sub>16</sub>F<sub>4</sub>N<sub>2</sub>O<sub>3</sub>

**ethyl 3-(3-fluoro-2-oxo-5-(pyridin-2-yl)-3-(trifluoromethyl)pyrrolidin-1-yl)benzoate (4n):**  
brown solid (mp = 81.6-82.3 °C), 33.9 mg, (Yield: 85%).

**<sup>1</sup>H NMR** (400 MHz, Chloroform-*d*) δ (ppm) = 8.58 (dd, *J* = 5.3, 1.9 Hz, 1H), 8.03 (s, 1H), 7.84 (d, *J* = 8.1 Hz, 1H), 7.69 (dd, *J* = 8.1, 2.3 Hz, 1H), 7.61 (td, *J* = 7.7, 1.8 Hz, 1H), 7.37 (t, *J* = 8.0 Hz, 1H), 7.24 – 7.16 (m, 2H), 5.43 (ddd, *J* = 7.7, 5.8, 3.8 Hz, 1H), 4.33 (q, *J* = 7.1 Hz, 2H), 3.24 (ddd, *J* = 15.0, 13.5, 7.6 Hz, 1H), 2.75 (ddd, *J* = 25.8, 15.0, 5.9 Hz, 1H), 1.36 (t, *J* = 7.1 Hz, 3H).

**<sup>13</sup>C NMR** (101 MHz, Chloroform-*d*) δ (ppm) = 165.5, 163.2 (d, *J* = 22.6 Hz), 156.9, 150.3, 137.3, 136.5, 131.4, 129.1, 127.7, 127.4, 123.7, 123.6, 121.8 (qd, *J* = 283.5, 31.7 Hz), 121.7, 92.2 (dq, *J* = 200.4, 34.2 Hz), 61.3, 60.5, 34.0 (d, *J* = 20.5 Hz), 14.2.

**<sup>19</sup>F NMR** (376 MHz, Chloroform-*d*) δ (ppm) = -79.88 (d, *J* = 10.8 Hz, 3F), -167.33 (q, *J* = 11.0 Hz, 1F).

**HRMS (ESI) m/z:** [M + H]<sup>+</sup> Calcd for C<sub>19</sub>H<sub>17</sub>F<sub>4</sub>N<sub>2</sub>O<sub>3</sub> 397.1170; Found 397.1167.

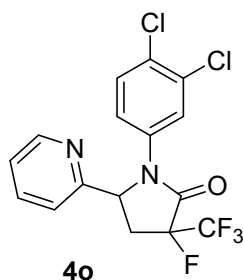

Chemical Formula: C<sub>16</sub>H<sub>10</sub>Cl<sub>2</sub>F<sub>4</sub>N<sub>2</sub>O

**1-(3,4-dichlorophenyl)-3-fluoro-5-(pyridin-2-yl)-3-(trifluoromethyl)pyrrolidin-2-one (4o):**  
white solid (mp = 127.7-128.5 °C), 24.3 mg, (Yield: 61%).

**<sup>1</sup>H NMR** (400 MHz, Chloroform-*d*) δ (ppm) = 8.63 – 8.56 (m, 1H), 7.72 – 7.63 (m, 2H), 7.33 (d, *J* = 8.8 Hz, 1H), 7.27 – 7.22 (m, 2H), 7.17 (d, *J* = 7.8 Hz, 1H), 5.34 (ddd, *J* = 7.9, 5.7, 3.6 Hz, 1H), 3.22 (td, *J* = 14.8, 7.7 Hz, 1H), 2.69 (dddd, *J* = 25.4, 15.2, 5.6, 1.3 Hz, 1H).

**<sup>13</sup>C NMR** (101 MHz, Chloroform-*d*) δ (ppm) = 163.2 (d, *J* = 22.6 Hz), 156.7, 150.4, 137.5, 135.7, 133.1, 130.6, 130.5, 124.6, 123.8, 121.8, 121.7 (qd, *J* = 283.6, 31.7 Hz), 121.3, 92.1 (dq, *J* = 200.6, 34.3 Hz), 60.4, 34.0 (d, *J* = 20.5 Hz).

**<sup>19</sup>F NMR** (376 MHz, Chloroform-*d*) δ (ppm) = -79.86 (d, *J* = 10.7 Hz, 3F), -167.17 (q, *J* = 10.8 Hz, 1F).

**HRMS (ESI) m/z:** [M + H]<sup>+</sup> Calcd for C<sub>16</sub>H<sub>11</sub>Cl<sub>2</sub>F<sub>4</sub>N<sub>2</sub>O 393.0179; Found 393.0178.

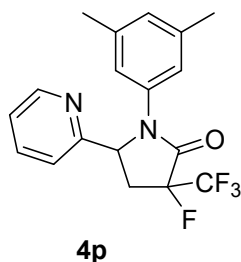

Chemical Formula: C<sub>18</sub>H<sub>16</sub>F<sub>4</sub>N<sub>2</sub>O

**1-(3,5-dimethylphenyl)-3-fluoro-5-(pyridin-2-yl)-3-(trifluoromethyl)pyrrolidin-2-one (4p):**  
white solid (mp = 138.4-139.0 °C), 26.6 mg, (Yield: 75%).

**<sup>1</sup>H NMR** (400 MHz, Chloroform-*d*) δ (ppm) = 8.61 – 8.55 (m, 1H), 7.61 (td, *J* = 7.8, 1.8 Hz, 1H), 7.23 – 7.13 (m, 2H), 7.03 (s, 2H), 6.79 (s, 1H), 5.36 (ddd, *J* = 7.8, 5.5, 3.9 Hz, 1H), 3.19 (td, *J* = 15.0, 7.7 Hz, 1H), 2.67 (dddd, *J* = 25.6, 15.0, 5.6, 1.3 Hz, 1H), 2.22 (s, 6H).

**<sup>13</sup>C NMR** (101 MHz, Chloroform-*d*) δ (ppm) = 163.1 (d, *J* = 22.2 Hz), 157.7, 149.9, 138.3, 137.2, 136.1, 128.6, 123.4, 121.3, 120.7, 119.2 (qd, *J* = 284.8, 32.3 Hz), 92.3 (dq, *J* = 199.6, 34.1 Hz), 60.7, 34.0 (d, *J* = 20.5 Hz), 21.2.

**<sup>19</sup>F NMR** (376 MHz, Chloroform-*d*) δ (ppm) = -79.90 (d, *J* = 10.6 Hz, 3F), -167.08 (q, *J* = 10.7 Hz, 1F).

**HRMS (ESI) m/z:** [M + H]<sup>+</sup> Calcd for C<sub>18</sub>H<sub>17</sub>F<sub>4</sub>N<sub>2</sub>O 353.1272; Found 353.1270.

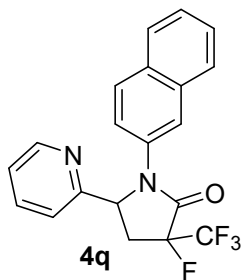

Chemical Formula:  $C_{20}H_{14}F_4N_2O$

**3-fluoro-1-(naphthalen-2-yl)-5-(pyridin-2-yl)-3-(trifluoromethyl)pyrrolidin-2-one (4q):** white solid (mp = 157.9-158.3 °C), 24.4 mg, (Yield: 65%).

**$^1H$  NMR** (400 MHz, Chloroform-*d*)  $\delta$  (ppm) = 8.56 (d,  $J$  = 4.6 Hz, 1H), 7.91 (s, 1H), 7.77 – 7.70 (m, 3H), 7.59 – 7.50 (m, 2H), 7.47 – 7.39 (m, 2H), 7.22 – 7.11 (m, 2H), 5.57 – 5.47 (m, 1H), 3.27 (tdd,  $J$  = 14.8, 7.7, 1.4 Hz, 1H), 2.74 (ddd,  $J$  = 25.7, 15.0, 5.7 Hz, 1H).

**$^{13}C$  NMR** (101 MHz, Chloroform-*d*)  $\delta$  (ppm) = 163.3 (d,  $J$  = 22.3 Hz), 157.4, 150.1, 137.3, 133.8, 133.0, 131.6, 129.0, 127.9, 127.5, 126.6, 126.3, 123.5, 121.9 (qd,  $J$  = 284.6, 31.9 Hz), 121.5, 121.4, 121.0, 92.4 (dq,  $J$  = 199.9, 34.1 Hz), 60.7, 34.1 (d,  $J$  = 20.3 Hz).

**$^{19}F$  NMR** (376 MHz, Chloroform-*d*)  $\delta$  (ppm) = -79.79 (d,  $J$  = 11.0 Hz, 3F), -166.94 (q,  $J$  = 11.2 Hz, 1F).

**HRMS (ESI) m/z:**  $[M + H]^+$  Calcd for  $C_{20}H_{15}F_4N_2O$  375.1115; Found 375.1113.

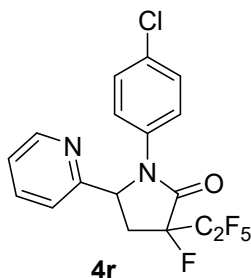

Chemical Formula:  $C_{17}H_{11}ClF_6N_2O$

**1-(4-chlorophenyl)-3-fluoro-3-(perfluoroethyl)-5-(pyridin-2-yl)pyrrolidin-2-one (4r):** yellow solid (mp = 97.3-98.6 °C), 26.2 mg, (Yield: 64%).

**$^1H$  NMR** (400 MHz, Chloroform-*d*)  $\delta$  (ppm) = 8.59 – 8.57 (m, 1H), 7.62 (td,  $J$  = 7.8, 1.8 Hz, 1H), 7.41 – 7.37 (m, 2H), 7.27 – 7.20 (m, 3H), 7.15 (d,  $J$  = 7.8 Hz, 1H), 5.35 (ddd,  $J$  = 7.6, 5.8, 3.6 Hz, 1H), 3.33 (td,  $J$  = 14.9, 7.5 Hz, 1H), 2.73 (ddd,  $J$  = 25.8, 15.1, 5.9 Hz, 1H).

**$^{13}C$  NMR** (101 MHz, Chloroform-*d*)  $\delta$  (ppm) = 163.0 (d,  $J$  = 23.2 Hz), 157.0, 150.2, 137.3, 134.9, 132.2, 129.2, 124.1, 123.7, 121.5, 92.9 (dt,  $J$  = 201.3, 28.9 Hz), 60.7, 34.5 (d,  $J$  = 20.9 Hz).

Carbons corresponding to the  $C_2F_5$  group cannot be identified due to C-F coupling.

**$^{19}F$  NMR** (376 MHz, Chloroform-*d*)  $\delta$  (ppm) = -79.82 (d,  $J$  = 10.4 Hz, 3F), -123.91 – -127.22 (m, 2F), -165.66 (h,  $J$  = 9.7 Hz, 1F).

**HRMS (ESI) m/z:**  $[M + H]^+$  Calcd for  $C_{17}H_{12}ClF_6N_2O$  409.0537; Found 409.0535.

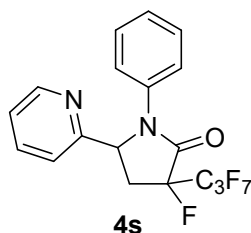

Chemical Formula:  $C_{18}H_{12}F_8N_2O$

**3-fluoro-3-(perfluoropropyl)-1-phenyl-5-(pyridin-2-yl)pyrrolidin-2-one (4s):** white solid (mp = 93.6-94.2 °C), 30.3 mg, (Yield: 71%).

$^1H$  NMR (400 MHz, Chloroform-*d*)  $\delta$  (ppm) = 8.60 – 8.55 (m, 1H), 7.60 (td,  $J$  = 7.7, 1.8 Hz, 1H), 7.47 – 7.42 (m, 2H), 7.32 – 7.25 (m, 2H), 7.21 – 7.13 (m, 3H), 5.41 (ddd,  $J$  = 7.7, 5.4, 3.7 Hz, 1H), 3.34 (dddd,  $J$  = 16.4, 15.2, 7.7, 1.2 Hz, 1H), 2.75 (ddd,  $J$  = 25.6, 15.1, 5.5 Hz, 1H).

$^{13}C$  NMR (101 MHz, Chloroform-*d*)  $\delta$  (ppm) = 163.0 (d,  $J$  = 21.8 Hz), 157.5, 150.0, 137.2, 136.3, 129.0, 126.7, 123.5, 122.8, 121.3, 93.5 (dt,  $J$  = 197.1, 28.3 Hz), 60.7, 34.5 (d,  $J$  = 20.8 Hz). Carbons corresponding to the  $C_3F_7$  group cannot be identified due to C-F coupling.

$^{19}F$  NMR (376 MHz, Chloroform-*d*)  $\delta$  (ppm) = -80.83 (td,  $J$  = 10.2, 3.9 Hz, 3F), -121.18 – -123.71 (m, 2F), -124.41 (dt,  $J$  = 10.3, 6.2 Hz, 2F), -164.45 (ttt,  $J$  = 13.2, 6.7, 3.9 Hz, 1F).

**HRMS (ESI) m/z:**  $[M + H]^+$  Calcd for  $C_{18}H_{13}F_8N_2O$  425.0895; Found 425.0891.

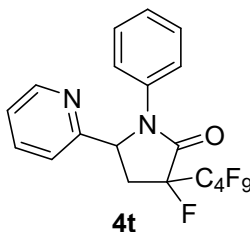

Chemical Formula:  $C_{19}H_{12}F_{10}N_2O$

**3-fluoro-3-(perfluorobutyl)-1-phenyl-5-(pyridin-2-yl)pyrrolidin-2-one (4t):** white solid (mp = 90.3-91.6 °C), 33.4 mg, (Yield: 70%).

$^1H$  NMR (400 MHz, Chloroform-*d*)  $\delta$  (ppm) = 8.58 (dd,  $J$  = 4.7, 1.4 Hz, 1H), 7.60 (td,  $J$  = 7.7, 1.8 Hz, 1H), 7.48 – 7.41 (m, 2H), 7.32 – 7.25 (m, 2H), 7.22 – 7.13 (m, 3H), 5.41 (ddd,  $J$  = 7.7, 5.5, 3.7 Hz, 1H), 3.35 (td,  $J$  = 15.9, 8.1 Hz, 1H), 2.75 (ddd,  $J$  = 25.6, 15.1, 5.5 Hz, 1H).

$^{13}C$  NMR (101 MHz, Chloroform-*d*)  $\delta$  (ppm) = 163.0 (d,  $J$  = 22.6 Hz), 157.5, 150.1, 137.2, 136.4, 129.0, 126.7, 123.5, 122.8, 121.4, 93.7 (dt,  $J$  = 203.1, 28.8 Hz), 60.7, 34.6 (d,  $J$  = 20.6 Hz). Carbons corresponding to the  $C_4F_9$  group cannot be identified due to C-F coupling.

$^{19}F$  NMR (376 MHz, Chloroform-*d*)  $\delta$  (ppm) = -80.77 (tt,  $J$  = 11.3, 2.8 Hz, 3F), -120.40 – -122.99 (m, 4F), -126.06 – -126.27 (m, 2F), -164.27 (tdq,  $J$  = 14.5, 10.4, 5.2 Hz, 1F).

**HRMS (ESI) m/z:**  $[M + H]^+$  Calcd for  $C_{19}H_{13}F_{10}N_2O$  475.0863; Found 475.0860.

## VIII. References

- (1) Y. Peng, C. Qin, X. Chen, J. Li, H. Li, W. Wang, *Asian J. Org. Chem.* **2017**, *6*, 694-697.
- (2) A. Saxena, B. Choi, & H. W. Lam, *J. Am. Chem. Soc.* **134**, 8428-8431.
- (3) (a) K. N. Lee, Z. Lei, & M.-Y. Ngai, *J. Am. Chem. Soc.* **139**, 5003-5006. (b) B. Zhou, Y. Hu, & C. Wang, *Angew. Chem. Int. Ed.* **54**, 13659-13663.

- (4) Gaussian 16, Revision A.03, M. J. Frisch, G. W. Trucks, H. B. Schlegel, G. E. Scuseria, M. A. Robb, J. R. Cheeseman, G. Scalmani, V. Barone, G. A. Petersson, H. Nakatsuji, X. Li, M. Caricato, A. V. Marenich, J. Bloino, B. G. Janesko, R. Gomperts, B. Mennucci, H. P. Hratchian, J. V. Ortiz, A. F. Izmaylov, J. L. Sonnenberg, D. Williams-Young, F. Ding, F. Lipparini, F. Egidi, J. Goings, B. Peng, A. Petrone, T. Henderson, D. Ranasinghe, V. G. Zakrzewski, J. Gao, N. Rega, G. Zheng, W. Liang, M. Hada, M. Ehara, K. Toyota, R. Fukuda, J. Hasegawa, M. Ishida, T. Nakajima, Y. Honda, O. Kitao, H. Nakai, T. Vreven, K. Throssell, J. A. Montgomery, Jr., J. E. Peralta, F. Ogliaro, M. J. Bearpark, J. J. Heyd, E. N. Brothers, K. N. Kudin, V. N. Staroverov, T. A. Keith, R. Kobayashi, J. Normand, K. Raghavachari, A. P. Rendell, J. C. Burant, S. S. Iyengar, J. Tomasi, M. Cossi, J. M. Millam, M. Klene, C. Adamo, R. Cammi, J. W. Ochterski, R. L. Martin, K. Morokuma, O. Farkas, J. B. Foresman, and D. J. Fox, Gaussian, Inc., Wallingford CT, 2016.
- (5) R. S. Paton, J. L. Mackey, W. H. Kim, J. H. Lee, S. J. Danishefsky, K. N. Houk, *J. Am. Chem. Soc.* **2010**, *132* (27), 9335–9340.
- (6) J. G. Harrison, O. Gutierrez, N. Jana, T. G. Driver, D. J. Tantillo, *J. Am. Chem. Soc.* **2016**, *138*, 487–490
- (7) A. V. Marenich, C. J. Cramer, D. G. Truhlar, *J. Phys. Chem. B* **2009**, *113*, 6378–6396.
- (8) Legault, C. Y. CYLview, 1.0b; Université de Sherbrooke, 2009; <http://www.cylview.org>.

## NMR Spectra of the Substrates

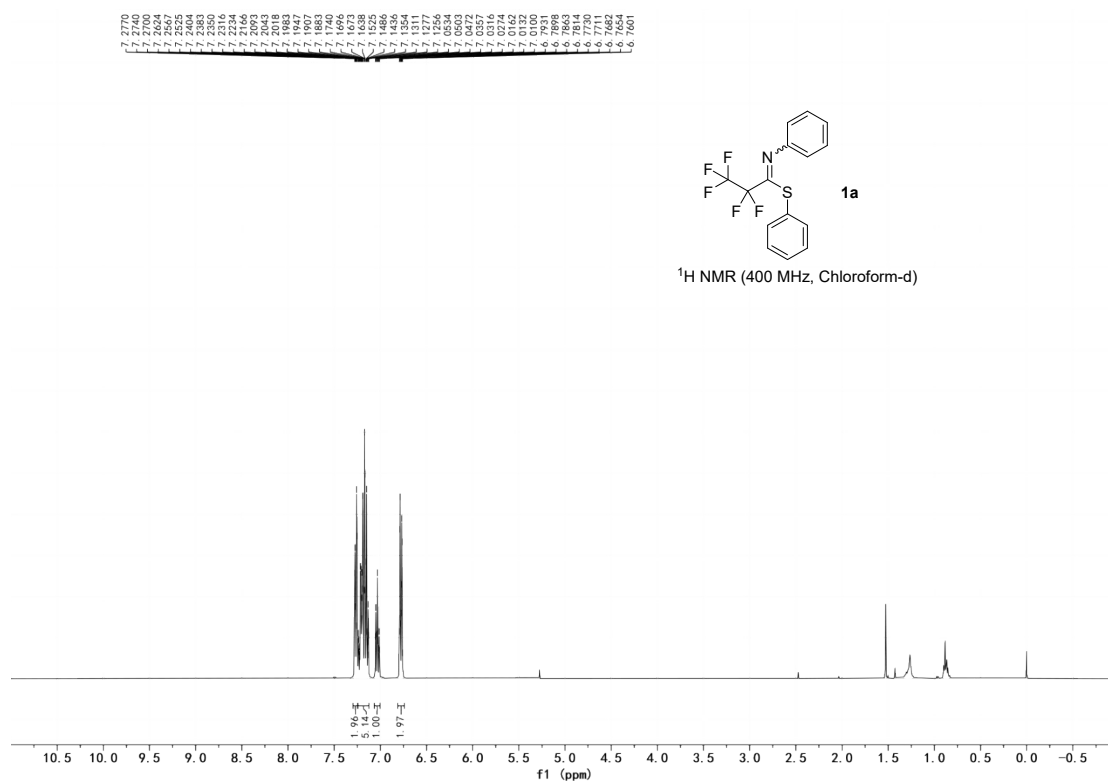



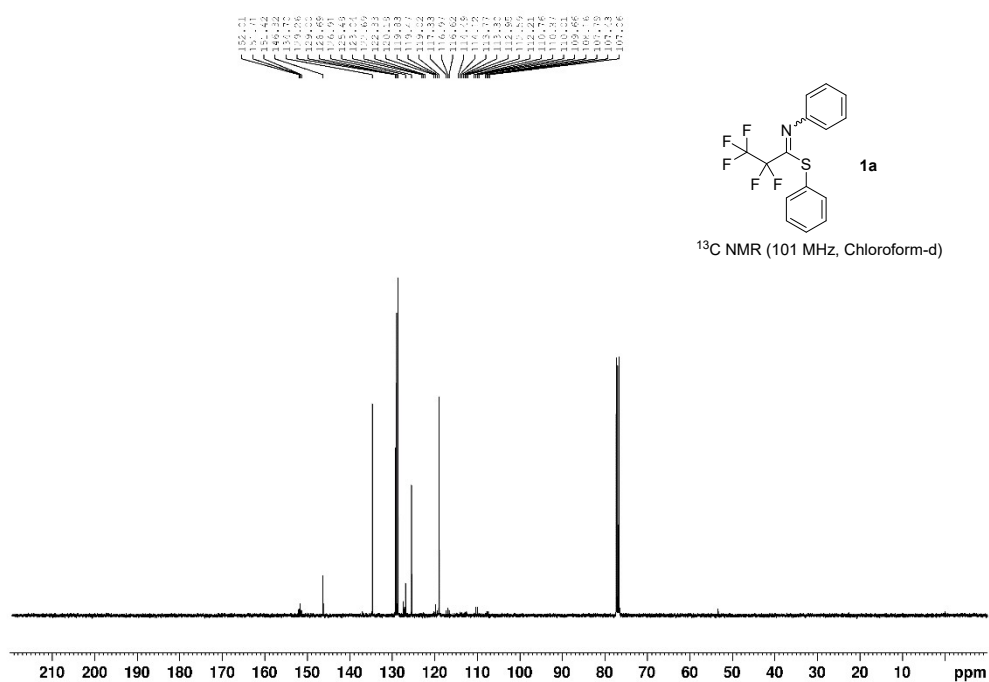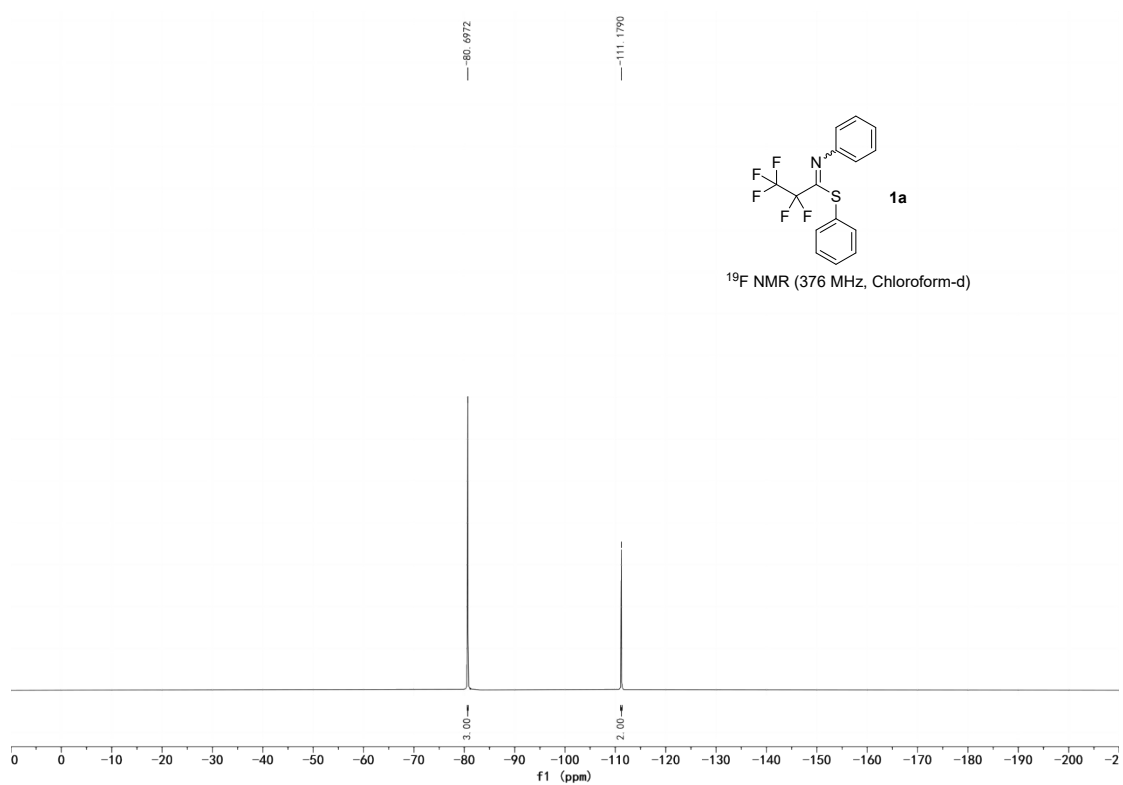

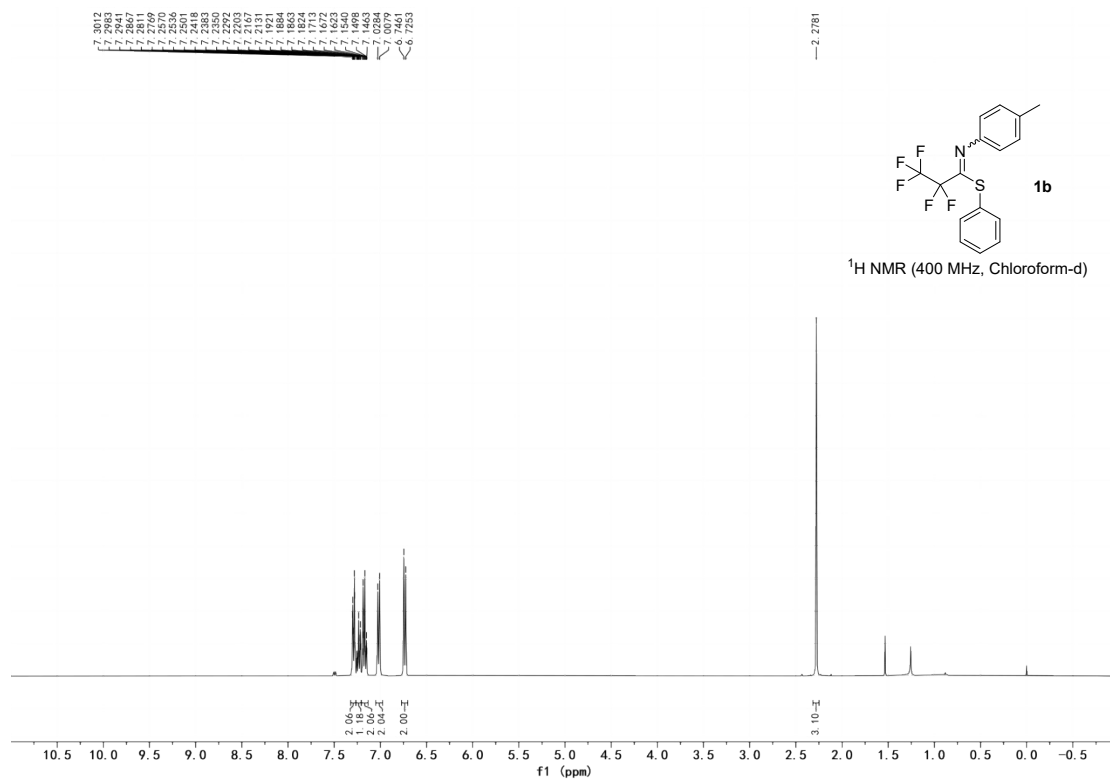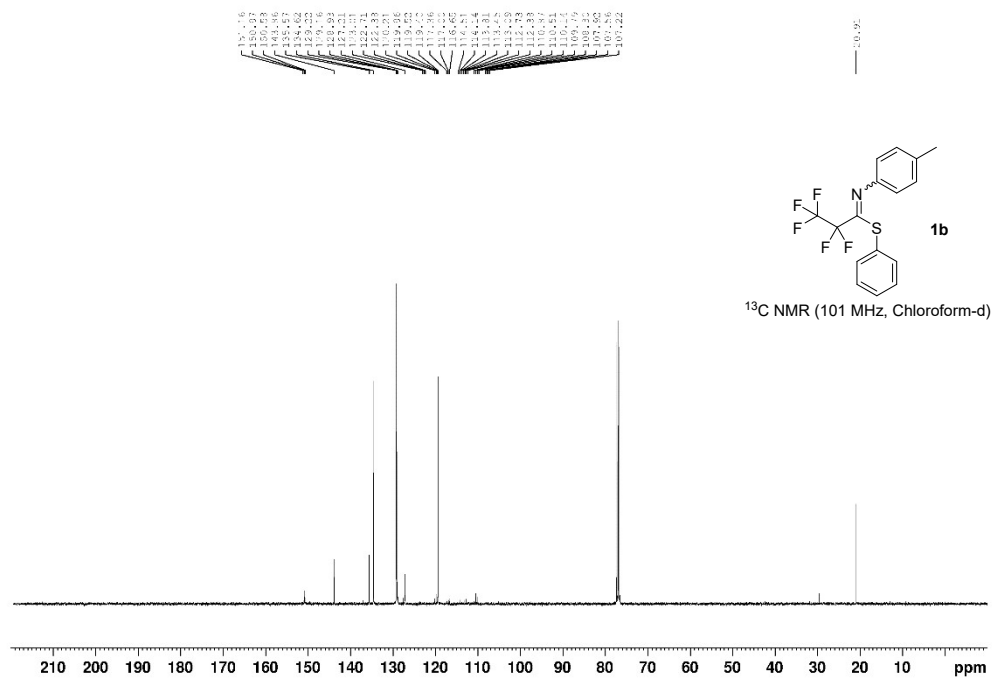

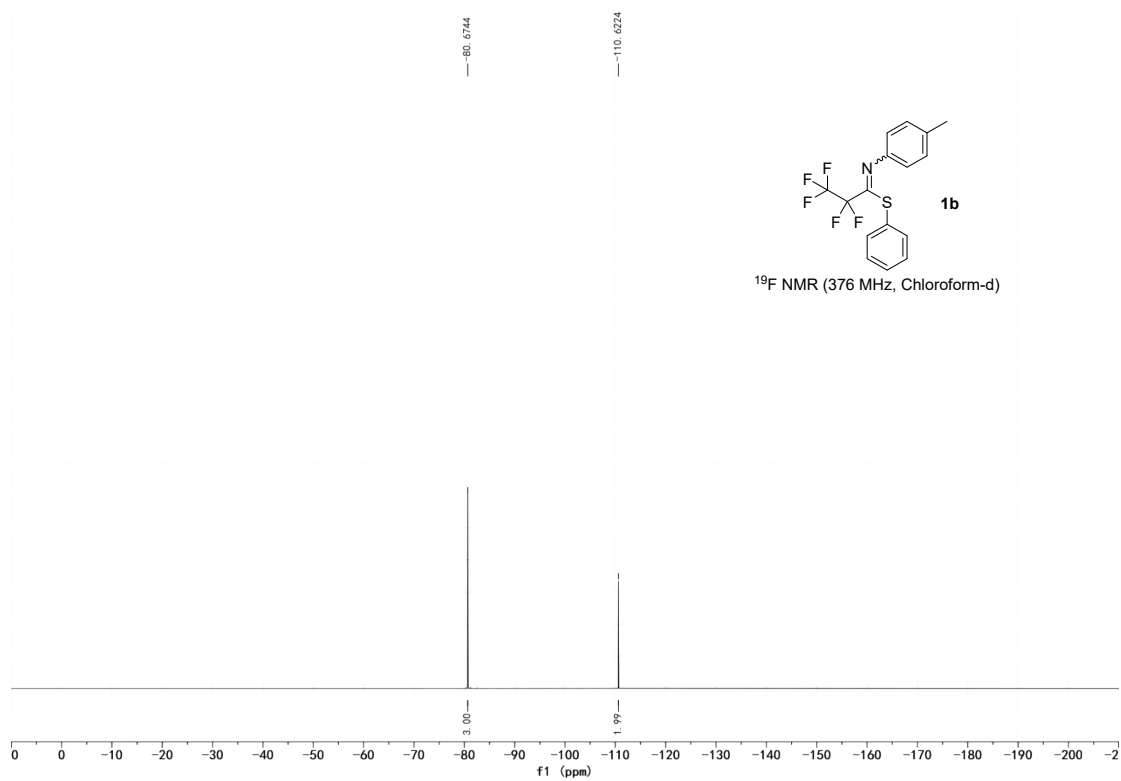

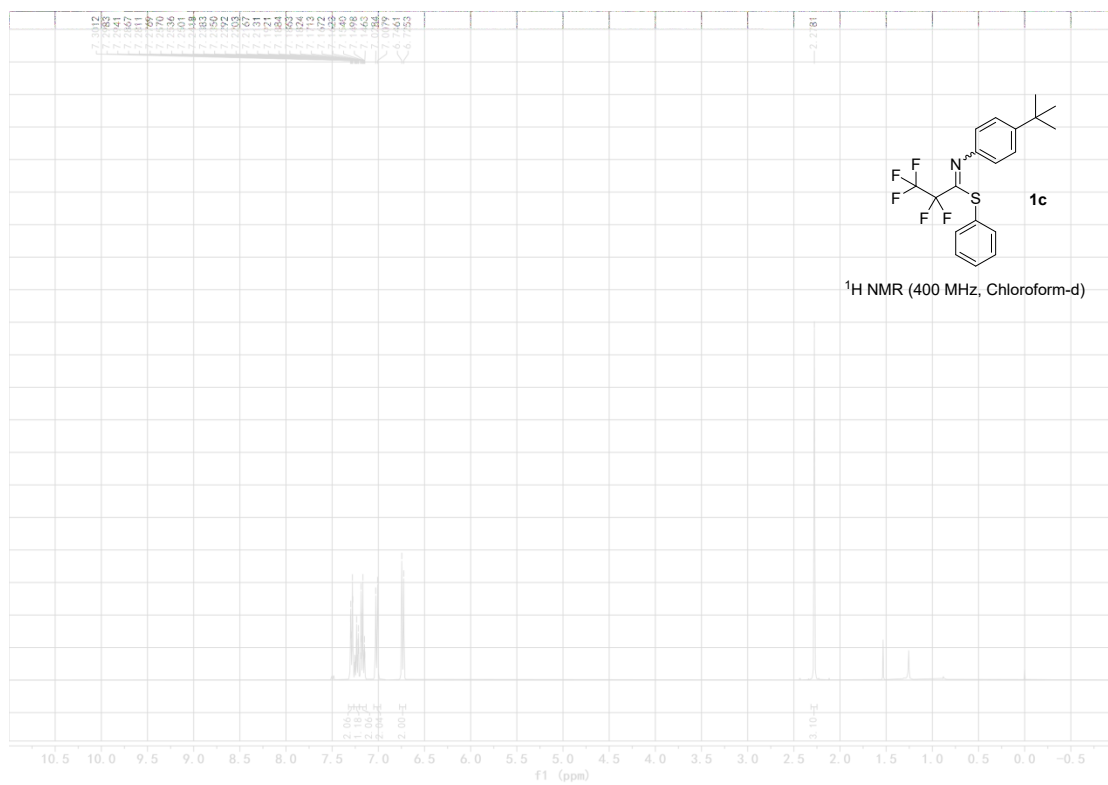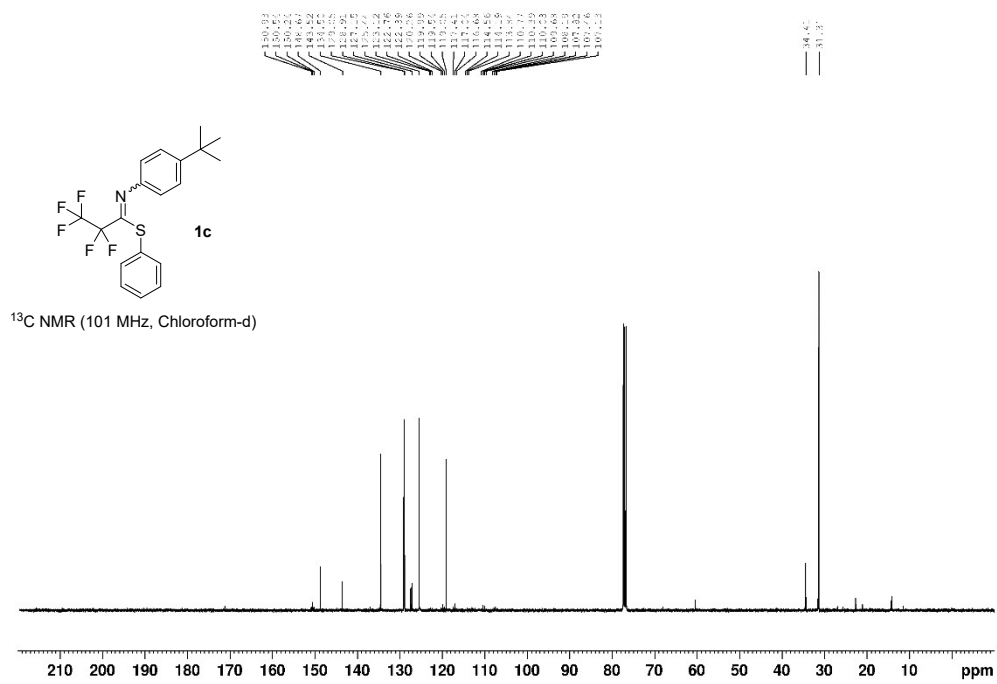

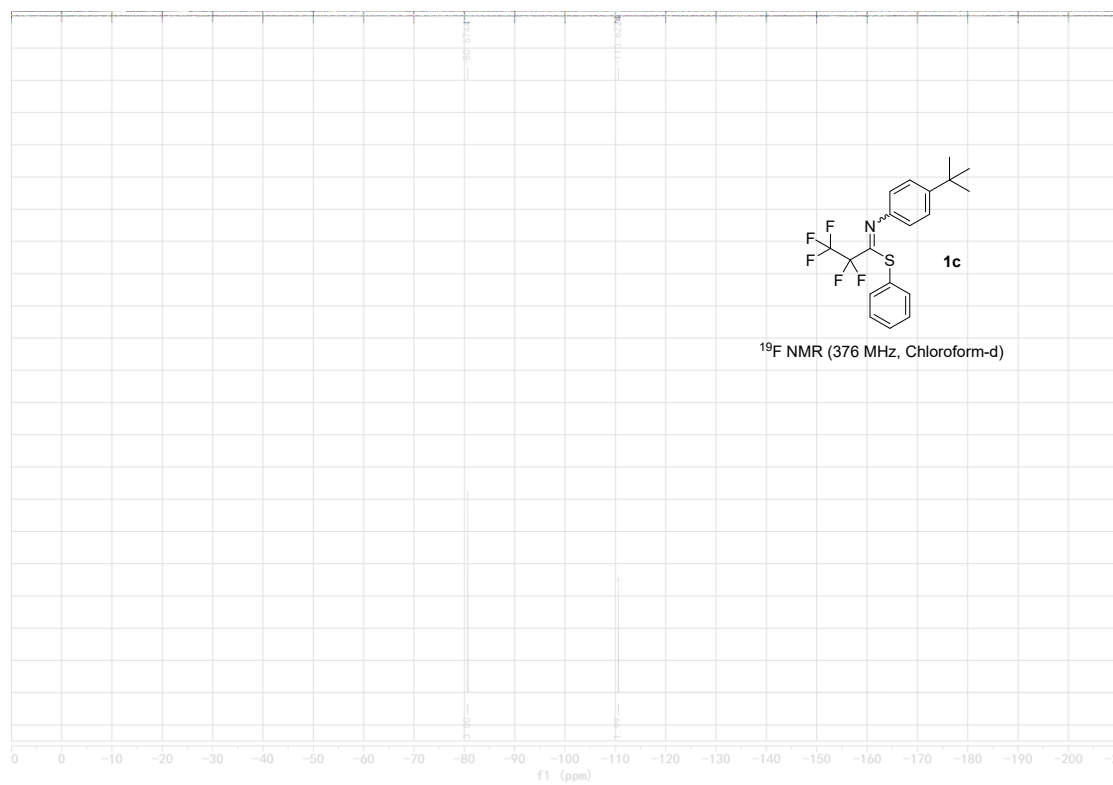



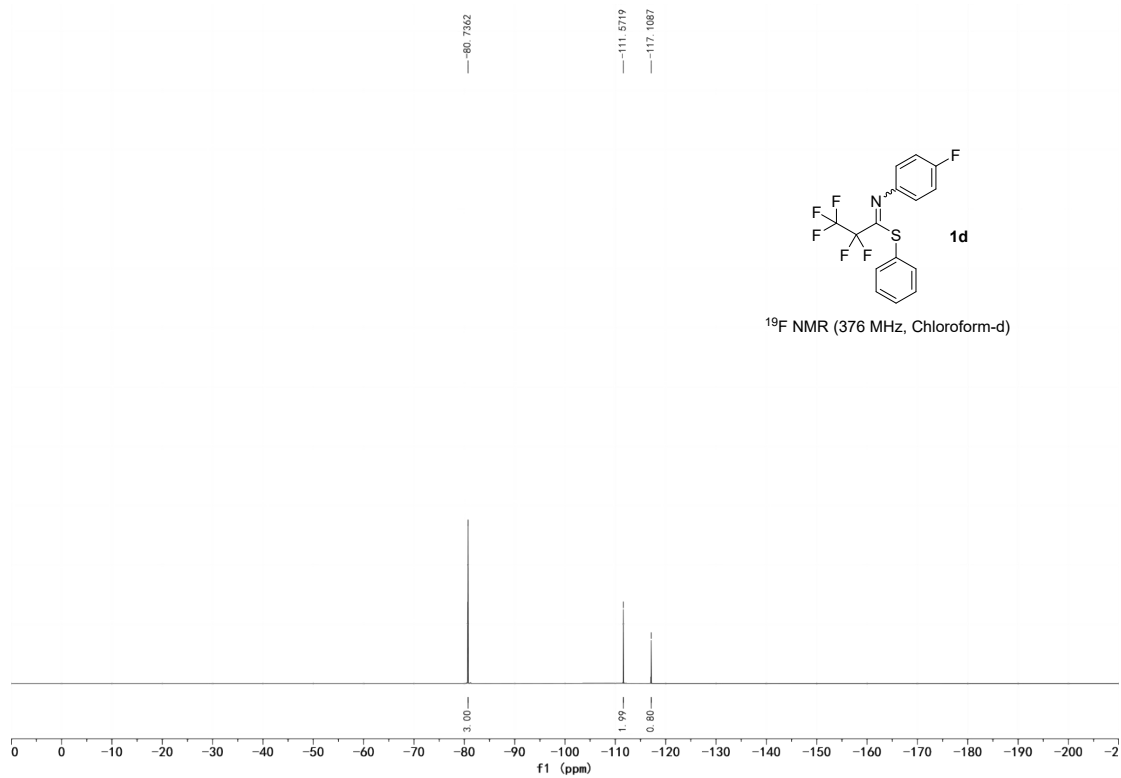





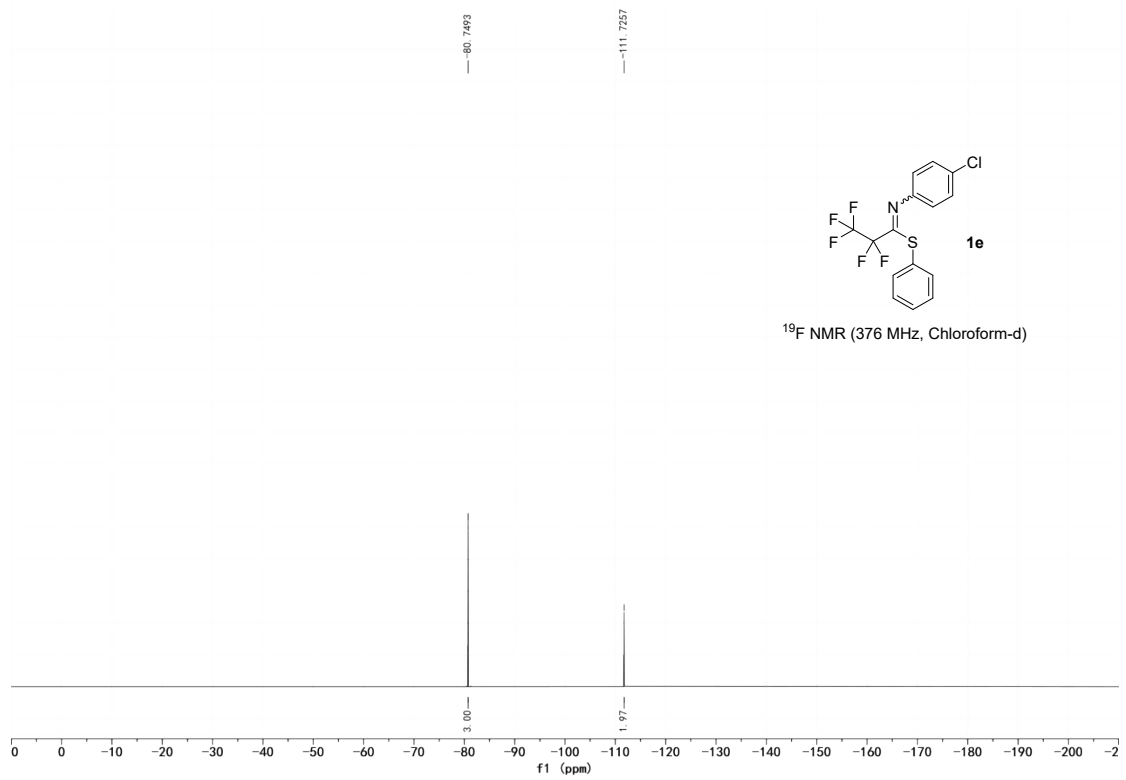

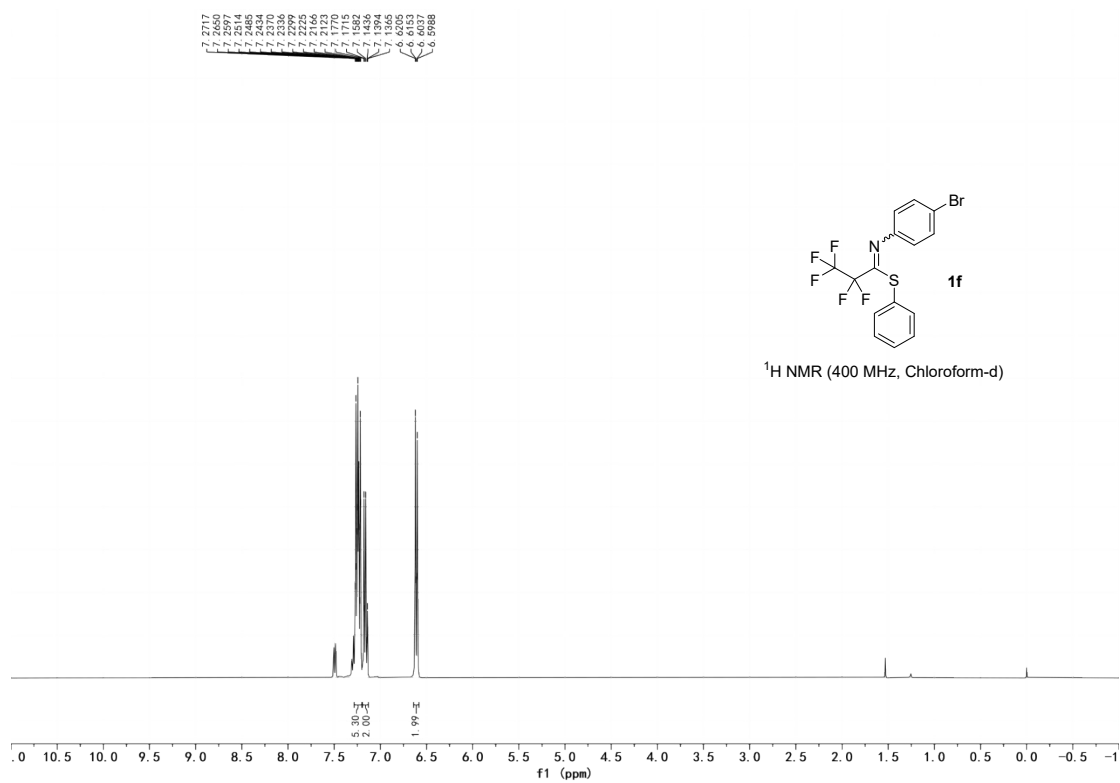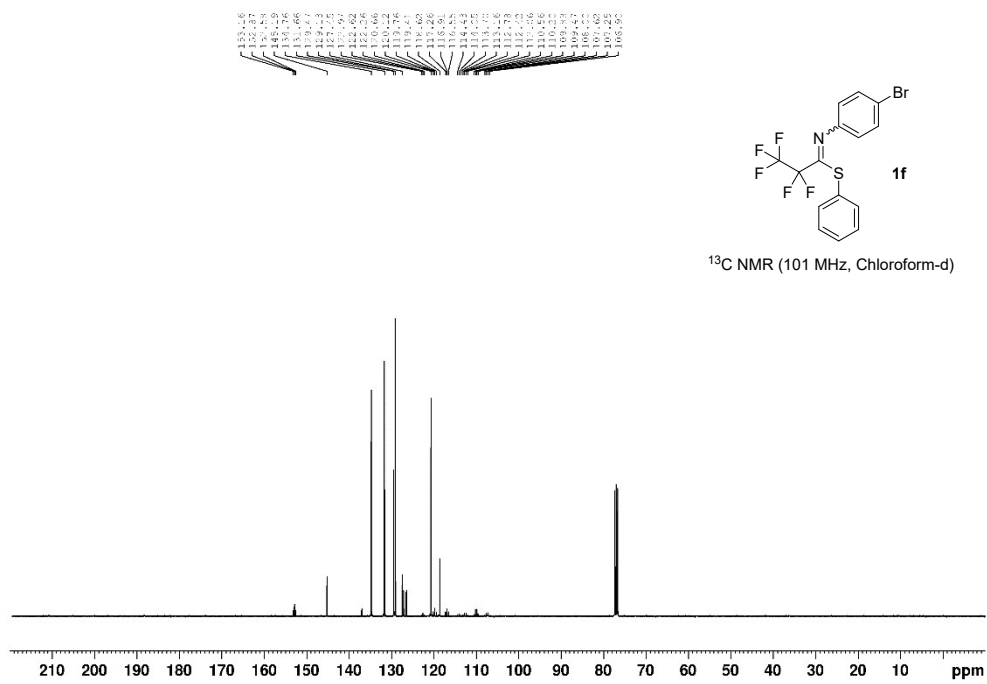

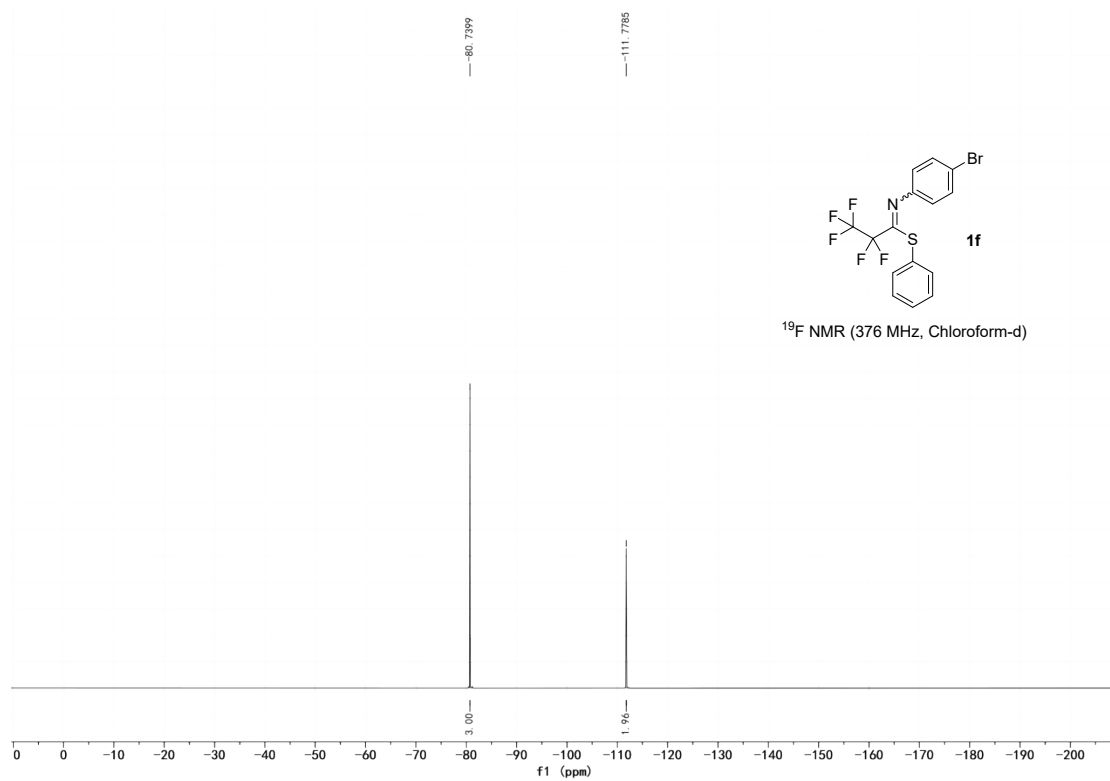



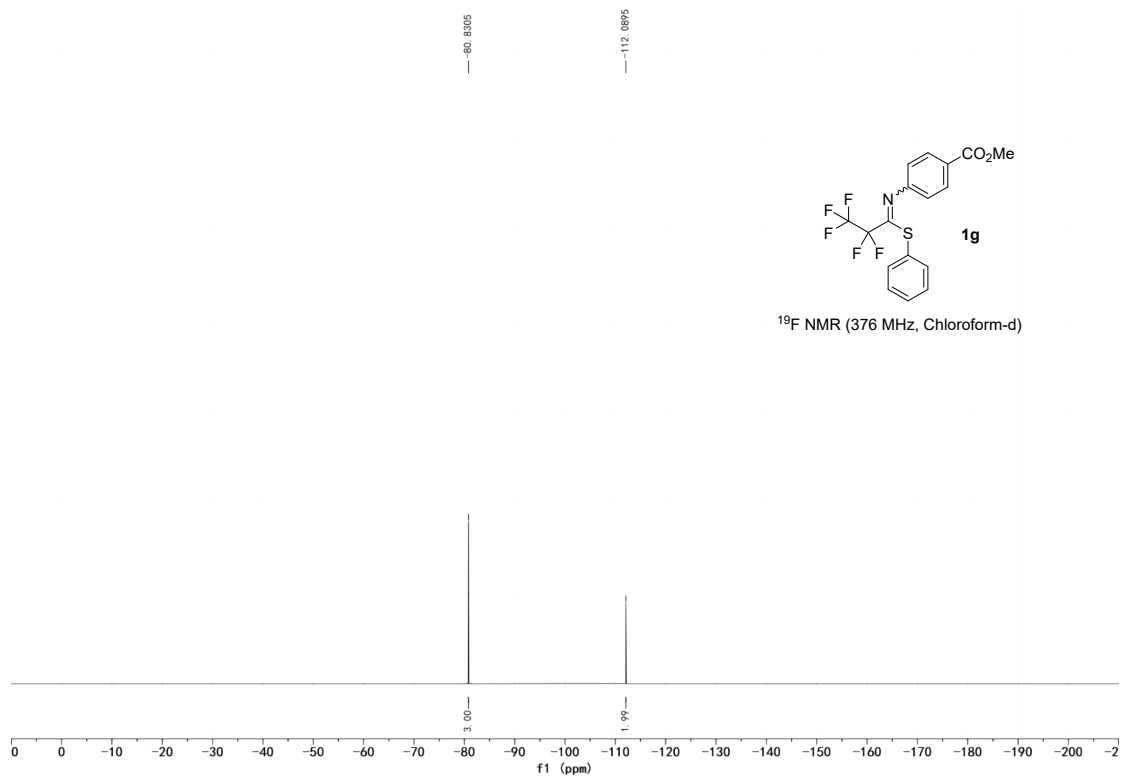

7.7450  
7.7326  
7.7292  
7.7117  
7.6203  
7.6156  
7.6039  
7.5991  
7.5874  
7.4688  
7.4691  
7.4870  
7.4795  
7.4657  
7.4656  
7.2490  
7.2490  
7.2490  
7.2490  
7.2482  
7.2388  
7.2355  
7.1675  
7.1657  
7.1656  
7.1656  
7.1473  
6.7917  
6.7909  
6.7704  
6.7650

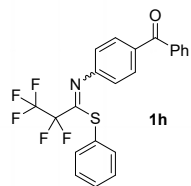

<sup>1</sup>H NMR (400 MHz, Chloroform-d)

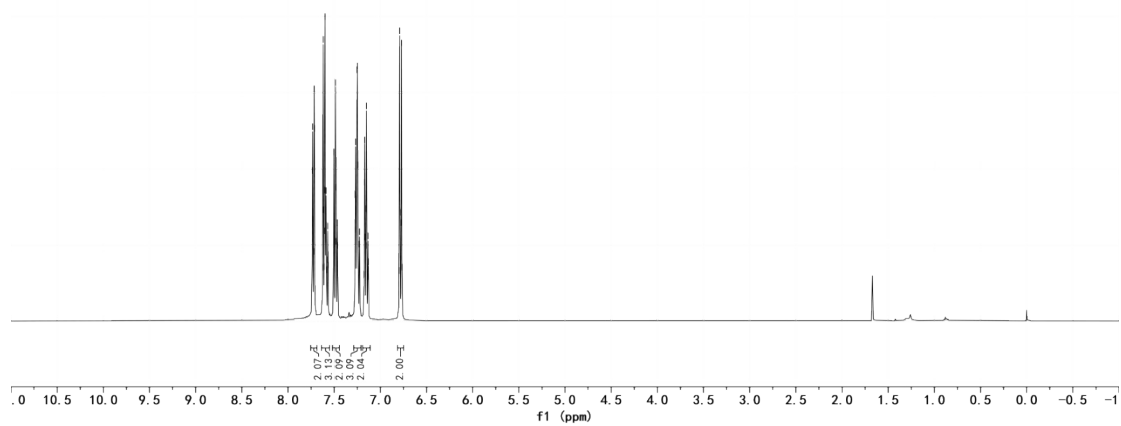

135.25

135.53  
135.50  
135.49  
135.48  
134.98  
134.94  
134.93  
134.92  
134.91  
134.90  
134.89  
134.88  
134.87  
134.86  
134.85  
134.84  
134.83  
134.82  
134.81  
134.80  
134.79  
134.78  
134.77  
134.76  
134.75  
134.74  
134.73  
134.72  
134.71  
134.70  
134.69  
134.68  
134.67  
134.66  
134.65  
134.64  
134.63  
134.62  
134.61  
134.60  
134.59  
134.58  
134.57  
134.56  
134.55  
134.54  
134.53  
134.52  
134.51  
134.50  
134.49  
134.48  
134.47  
134.46  
134.45  
134.44  
134.43  
134.42  
134.41  
134.40  
134.39  
134.38  
134.37  
134.36  
134.35  
134.34  
134.33  
134.32  
134.31  
134.30  
134.29  
134.28  
134.27  
134.26  
134.25  
134.24  
134.23  
134.22  
134.21  
134.20  
134.19  
134.18  
134.17  
134.16  
134.15  
134.14  
134.13  
134.12  
134.11  
134.10  
134.09  
134.08  
134.07  
134.06  
134.05  
134.04  
134.03  
134.02  
134.01  
133.99  
133.97  
133.95  
133.93  
133.91  
133.89  
133.87  
133.85  
133.83  
133.81  
133.79  
133.77  
133.75  
133.73  
133.71  
133.69  
133.67  
133.65  
133.63  
133.61  
133.59  
133.57  
133.55  
133.53  
133.51  
133.49  
133.47  
133.45  
133.43  
133.41  
133.39  
133.37  
133.35  
133.33  
133.31  
133.29  
133.27  
133.25  
133.23  
133.21  
133.19  
133.17  
133.15  
133.13  
133.11  
133.09  
133.07  
133.05  
133.03  
133.01  
132.99  
132.97  
132.95  
132.93  
132.91  
132.89  
132.87  
132.85  
132.83  
132.81  
132.79  
132.77  
132.75  
132.73  
132.71  
132.69  
132.67  
132.65  
132.63  
132.61  
132.59  
132.57  
132.55  
132.53  
132.51  
132.49  
132.47  
132.45  
132.43  
132.41  
132.39  
132.37  
132.35  
132.33  
132.31  
132.29  
132.27  
132.25  
132.23  
132.21  
132.19  
132.17  
132.15  
132.13  
132.11  
132.09  
132.07  
132.05  
132.03  
132.01  
131.99  
131.97  
131.95  
131.93  
131.91  
131.89  
131.87  
131.85  
131.83  
131.81  
131.79  
131.77  
131.75  
131.73  
131.71  
131.69  
131.67  
131.65  
131.63  
131.61  
131.59  
131.57  
131.55  
131.53  
131.51  
131.49  
131.47  
131.45  
131.43  
131.41  
131.39  
131.37  
131.35  
131.33  
131.31  
131.29  
131.27  
131.25  
131.23  
131.21  
131.19  
131.17  
131.15  
131.13  
131.11  
131.09  
131.07  
131.05  
131.03  
131.01  
130.99  
130.97  
130.95  
130.93  
130.91  
130.89  
130.87  
130.85  
130.83  
130.81  
130.79  
130.77  
130.75

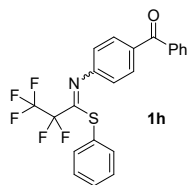

<sup>13</sup>C NMR (101 MHz, Chloroform-d)

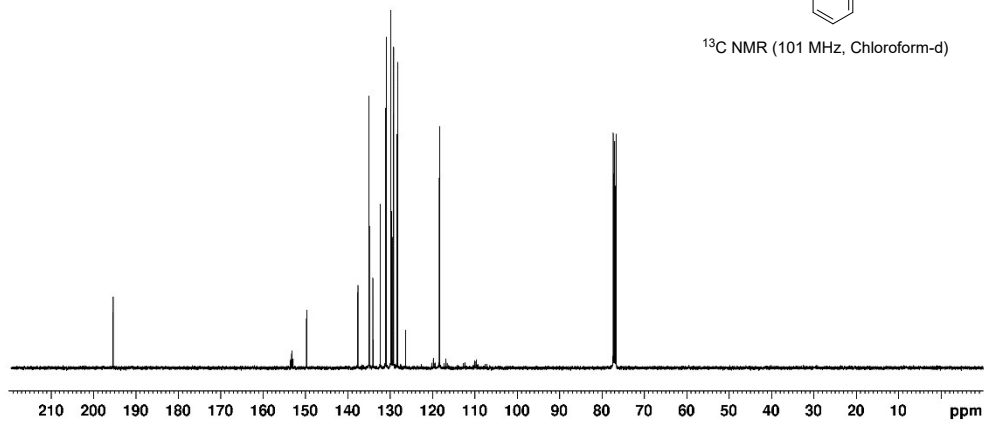

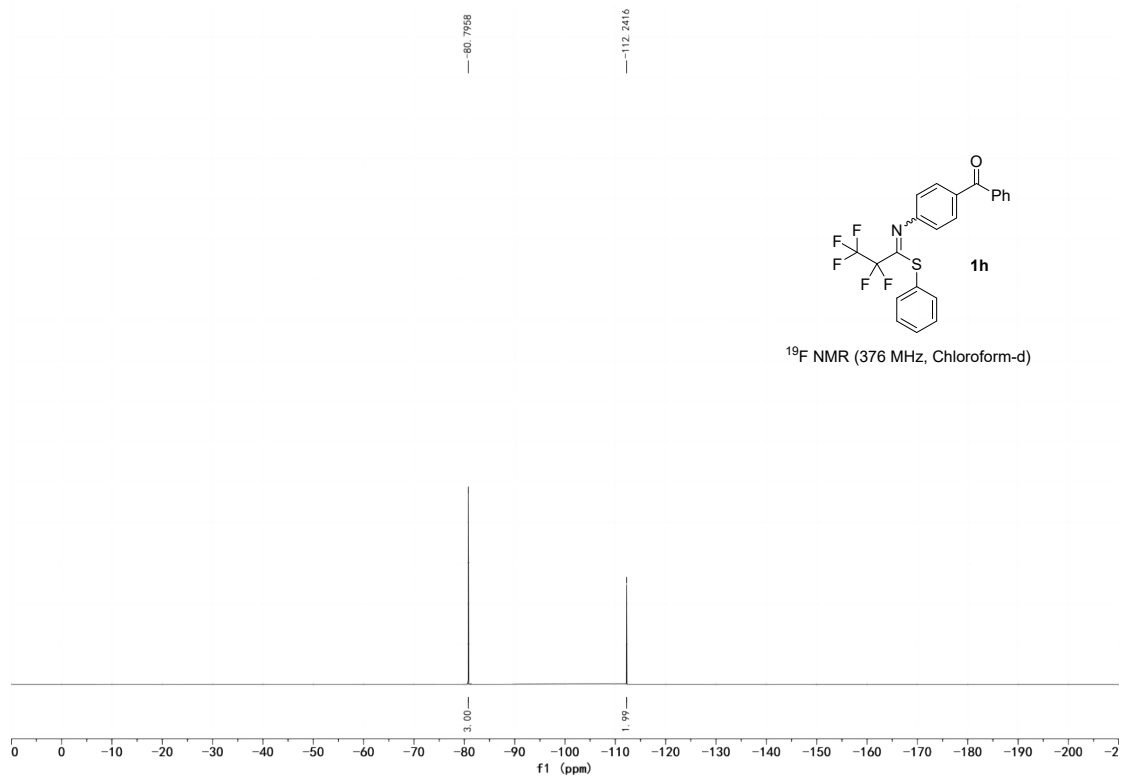

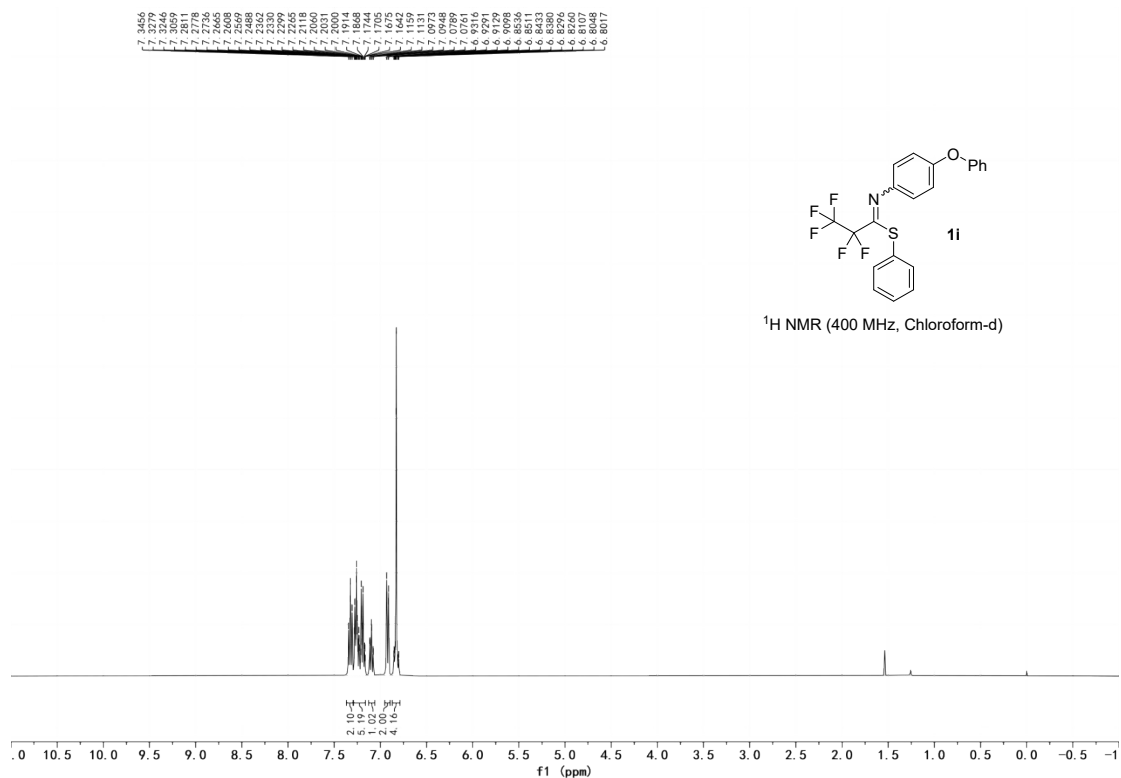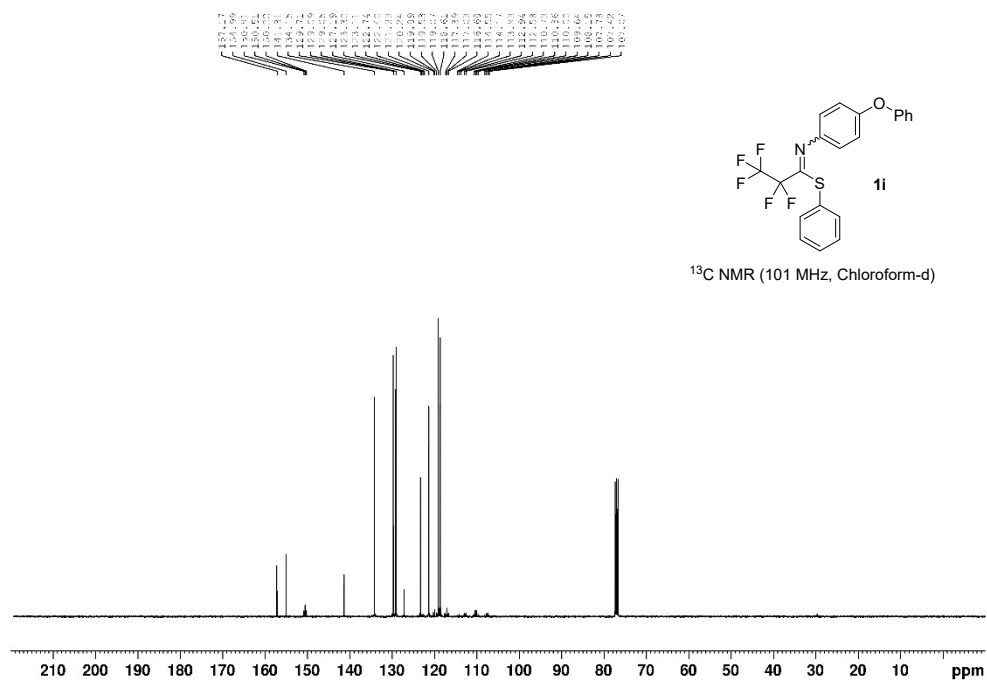



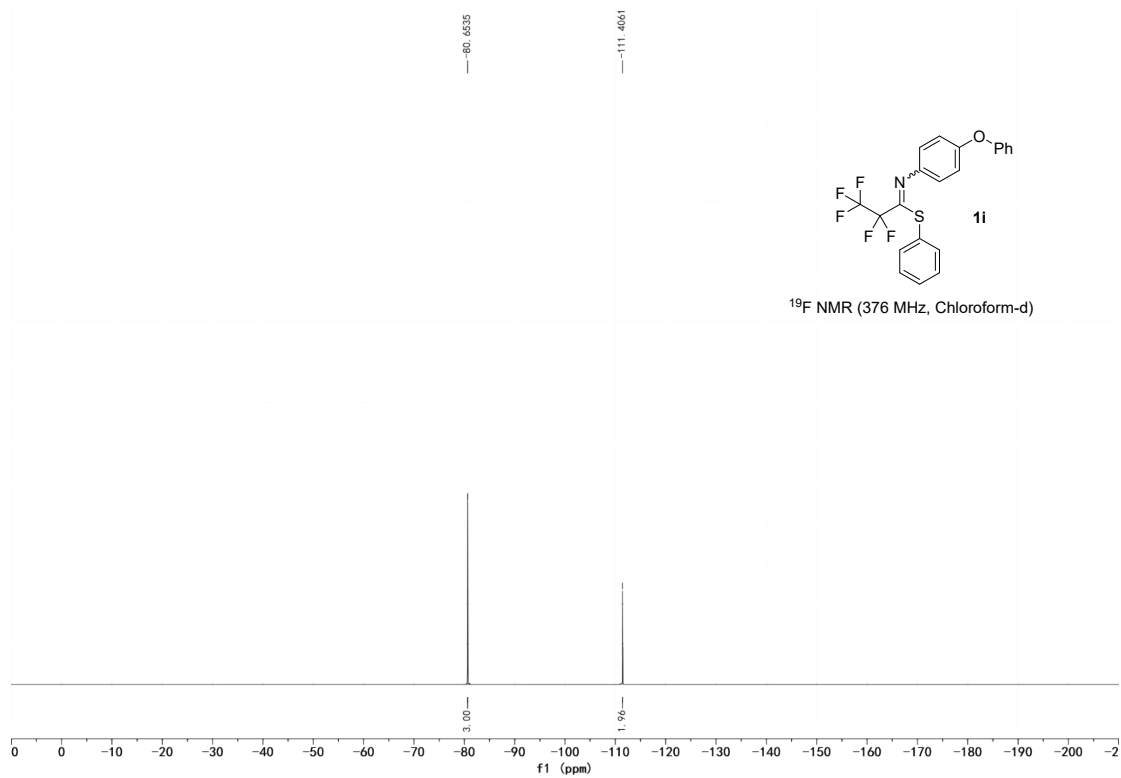

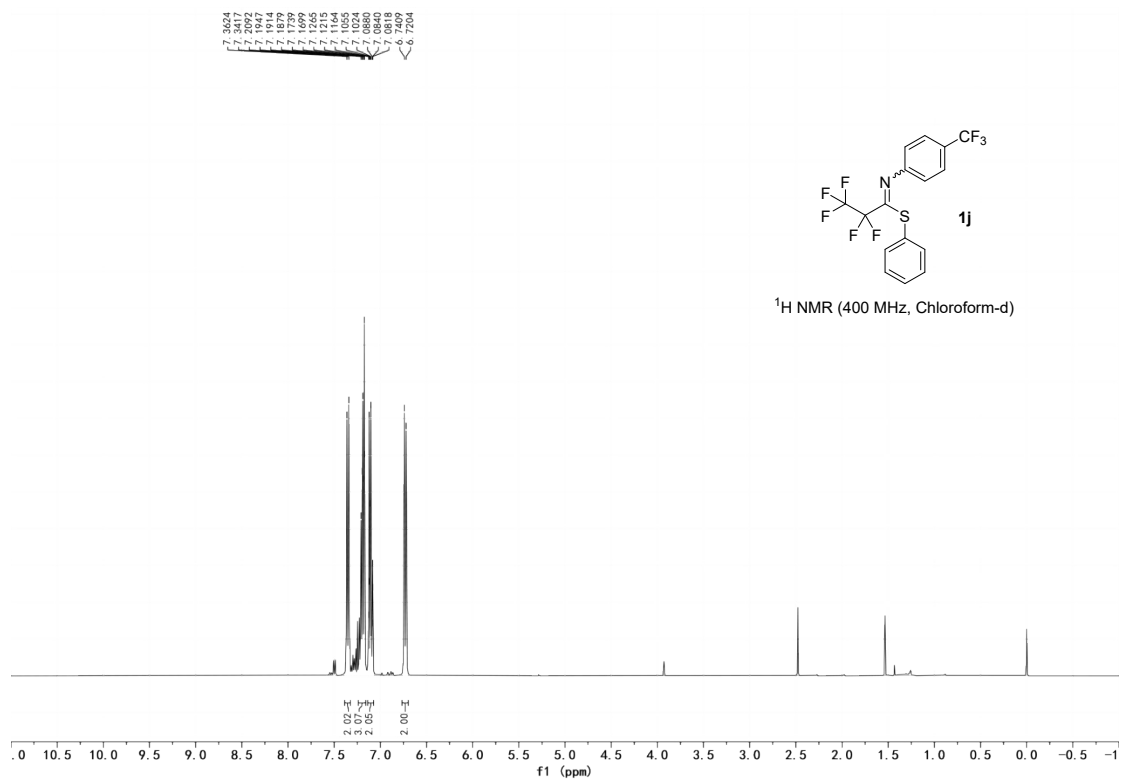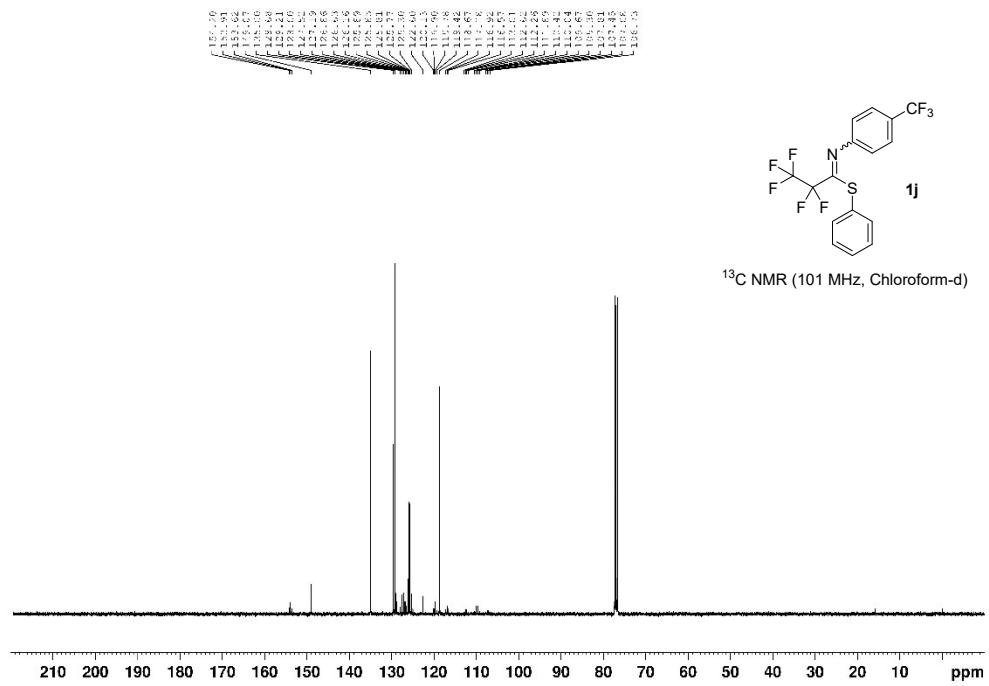

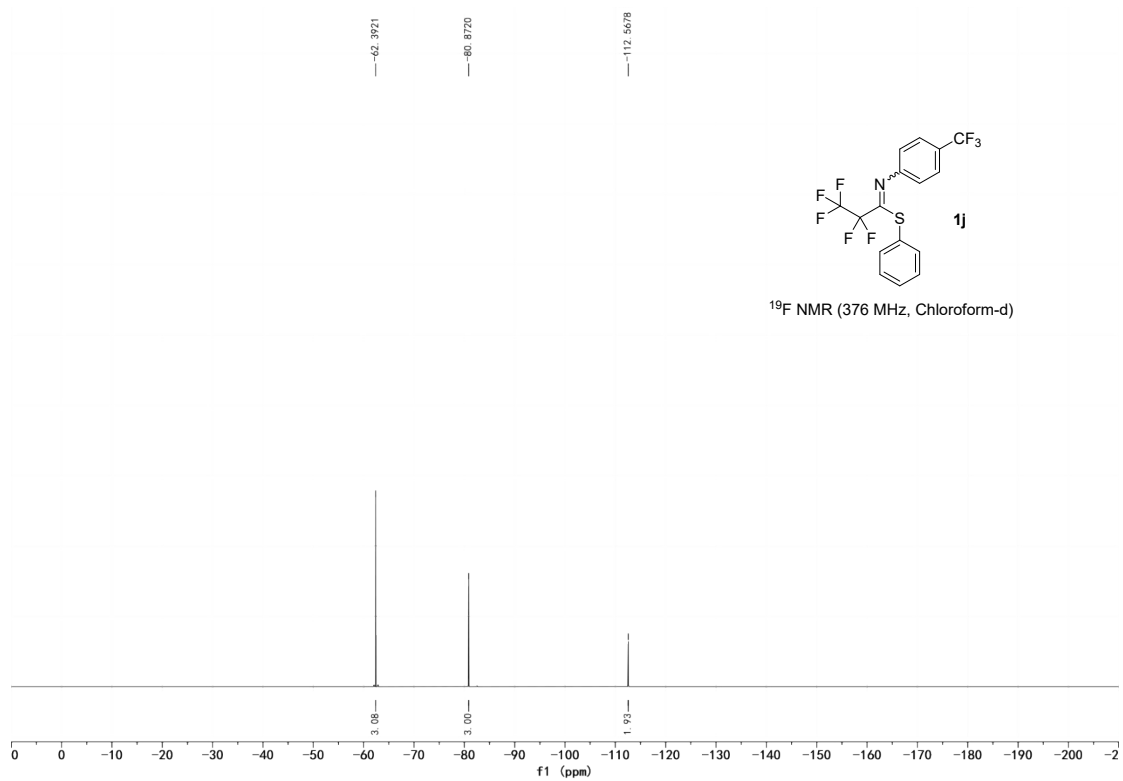

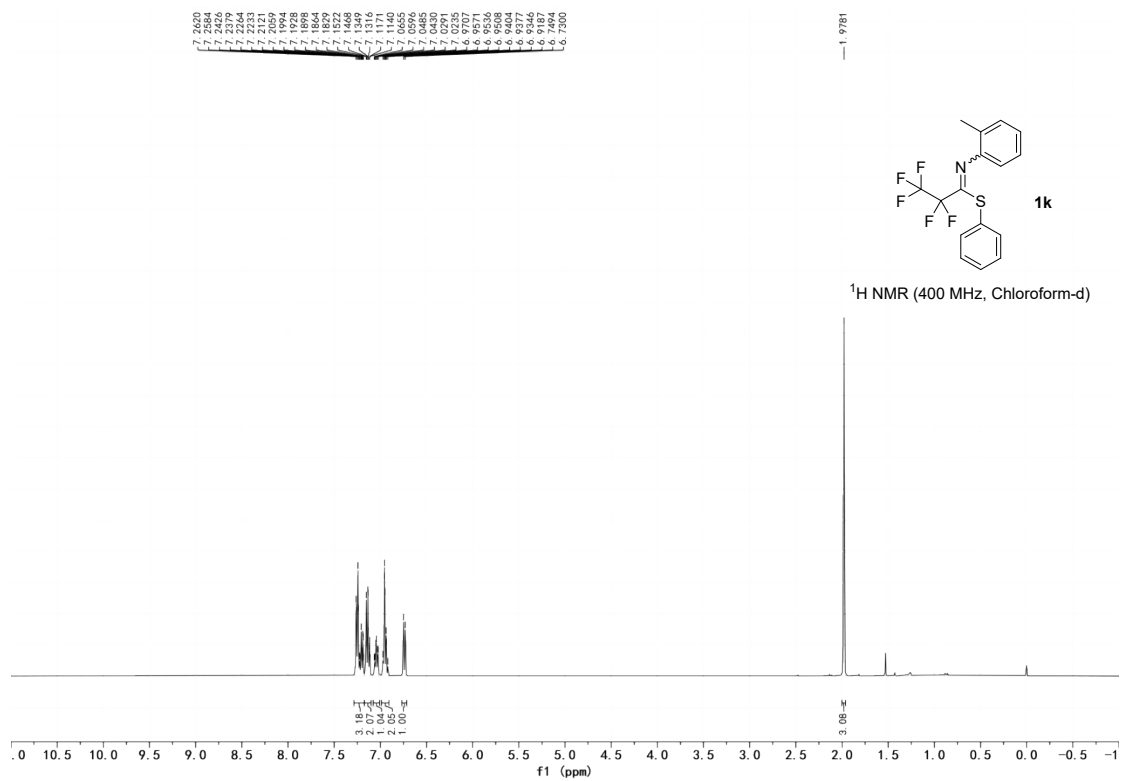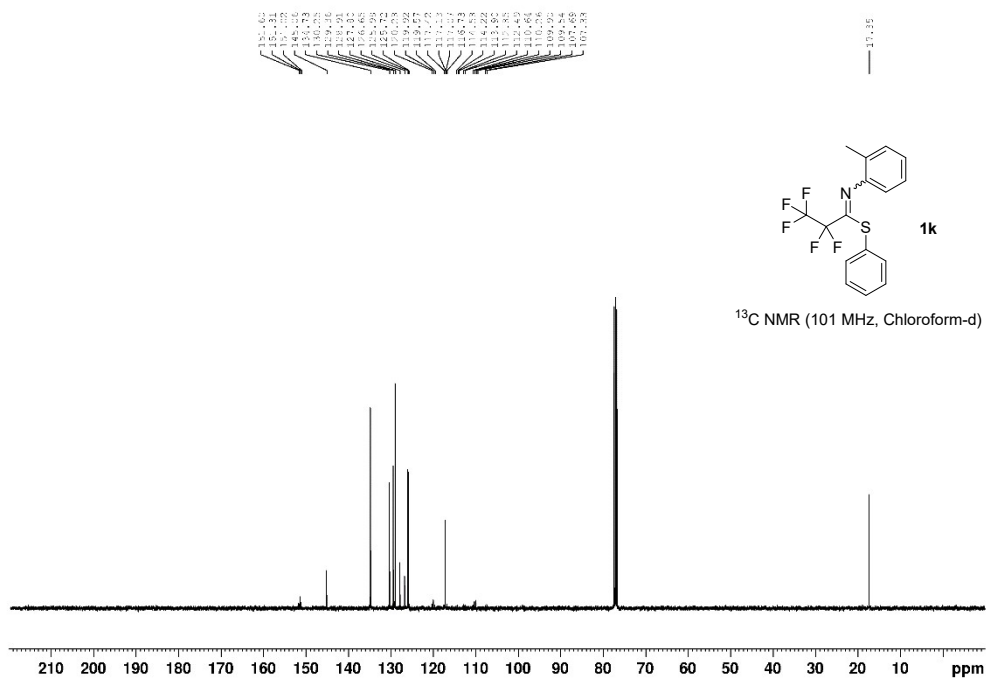

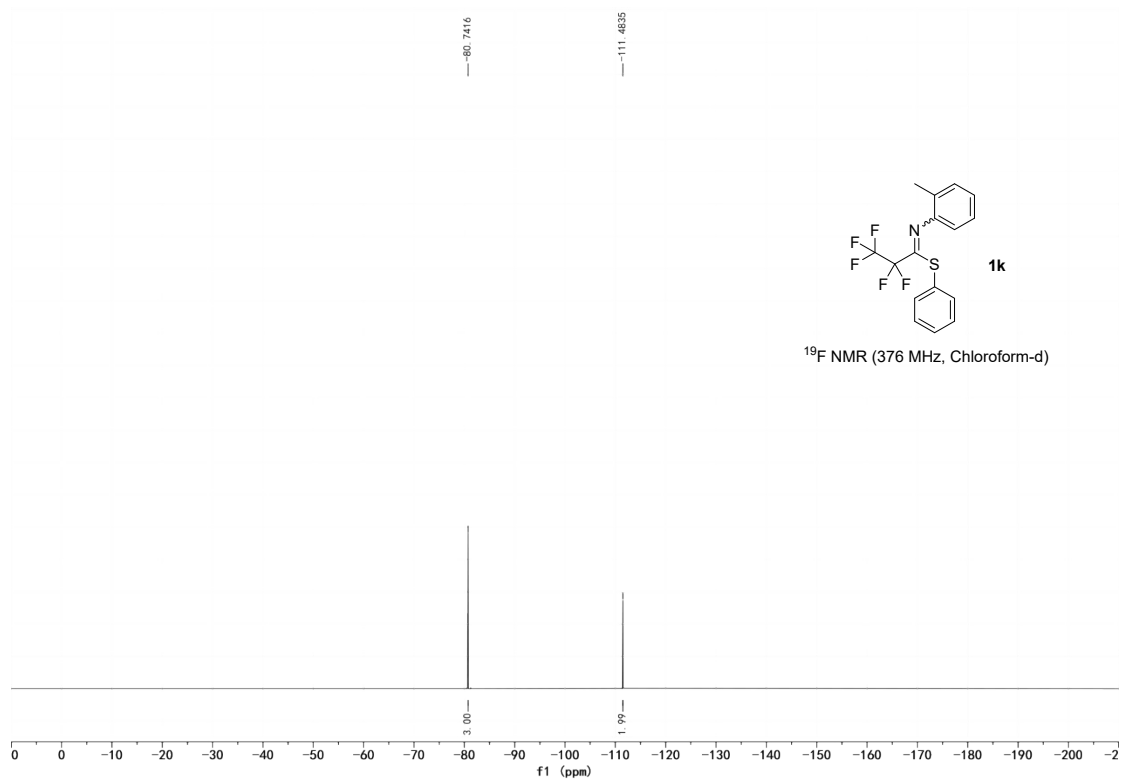

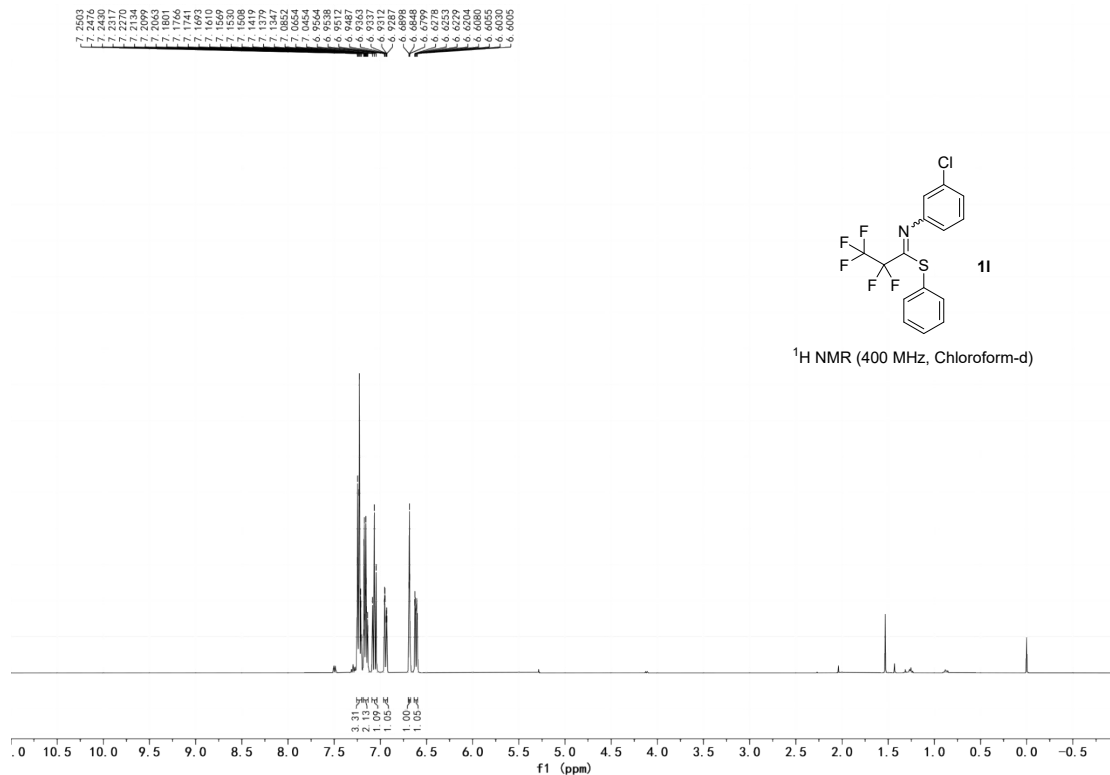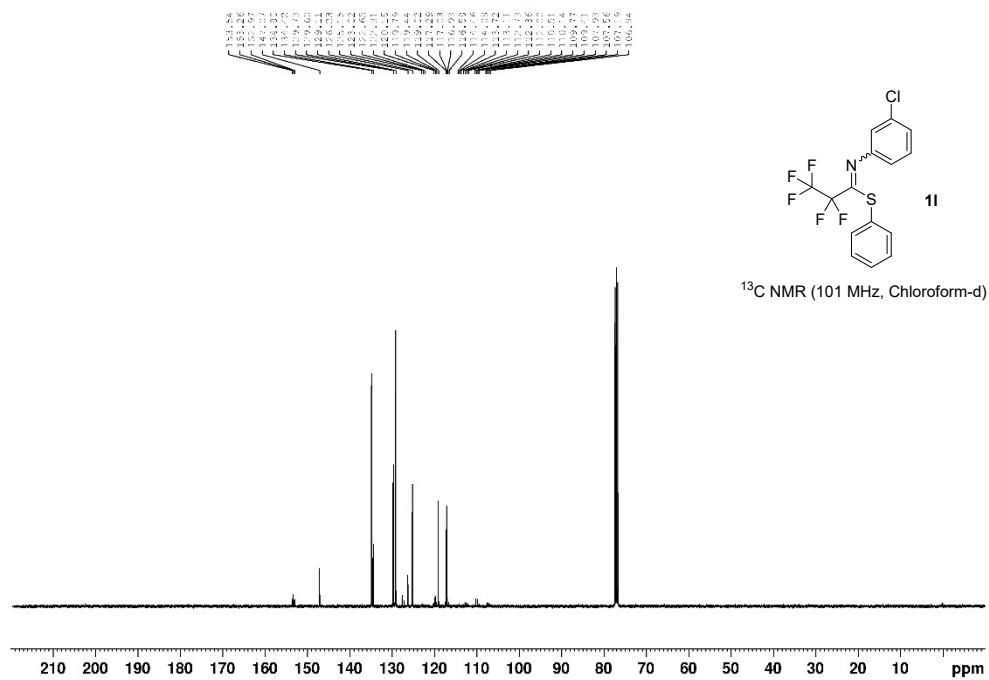

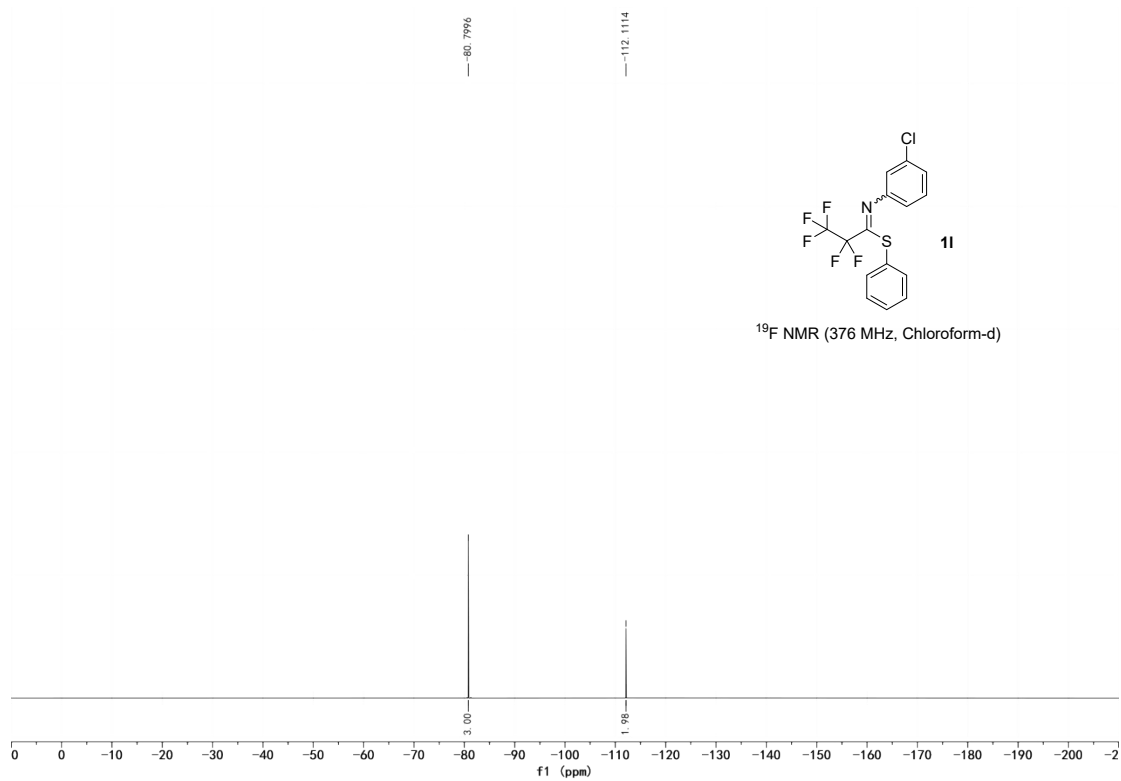

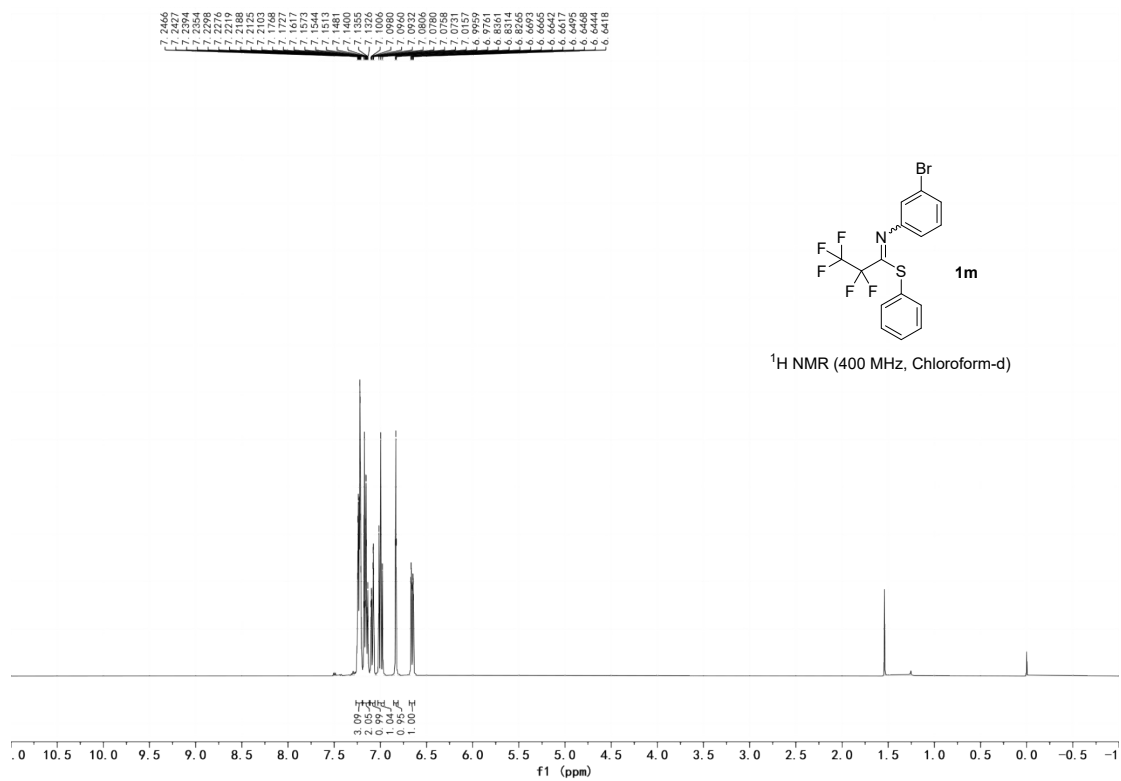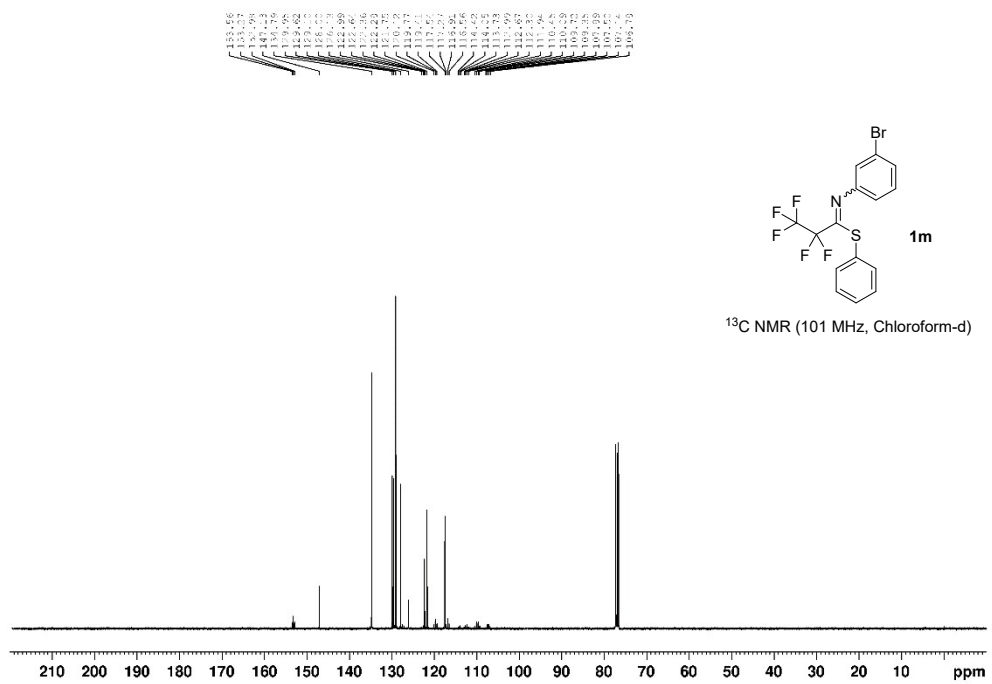



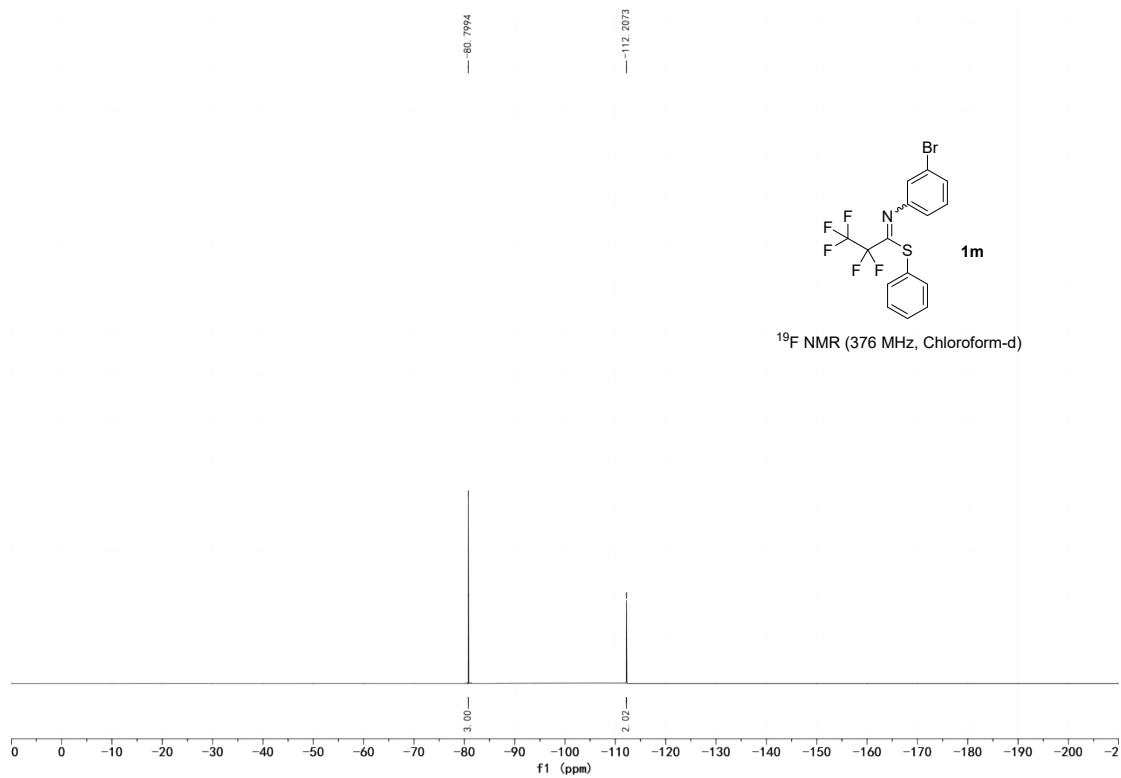

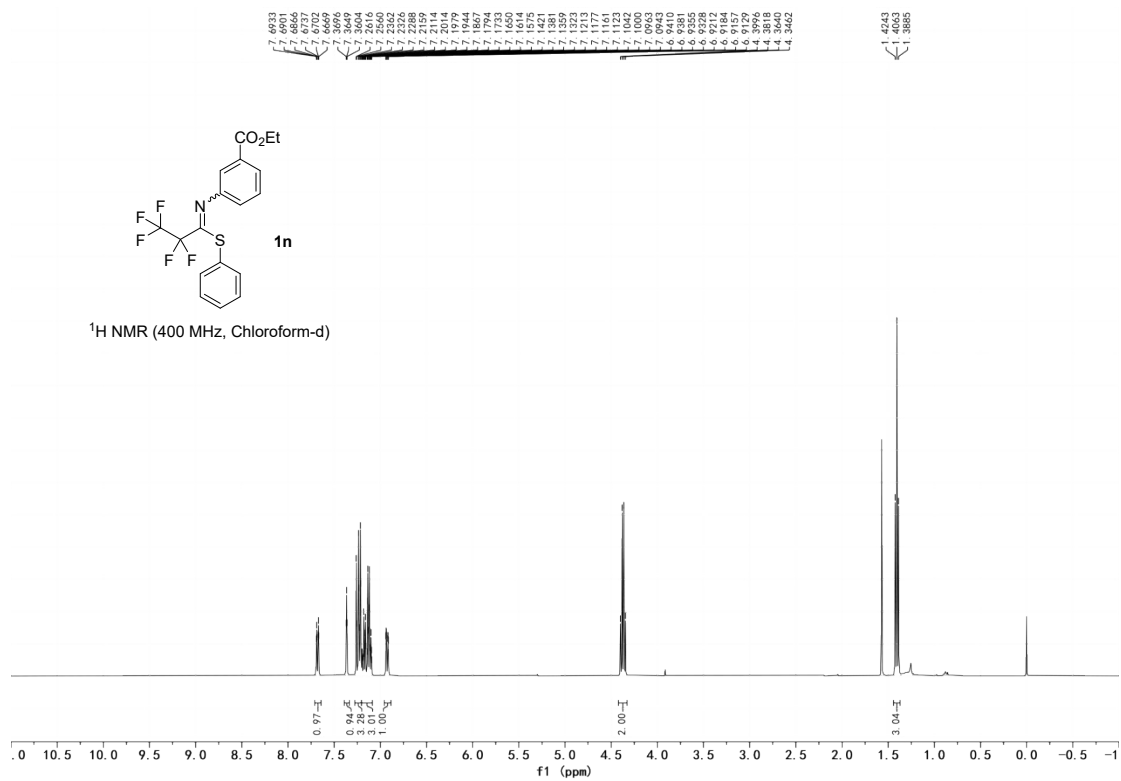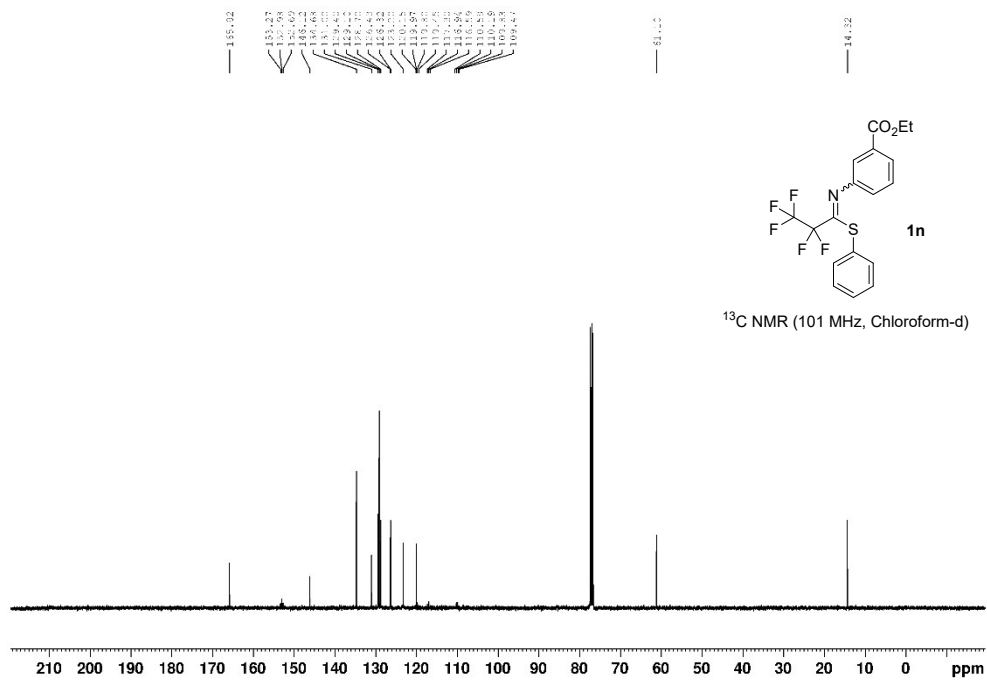

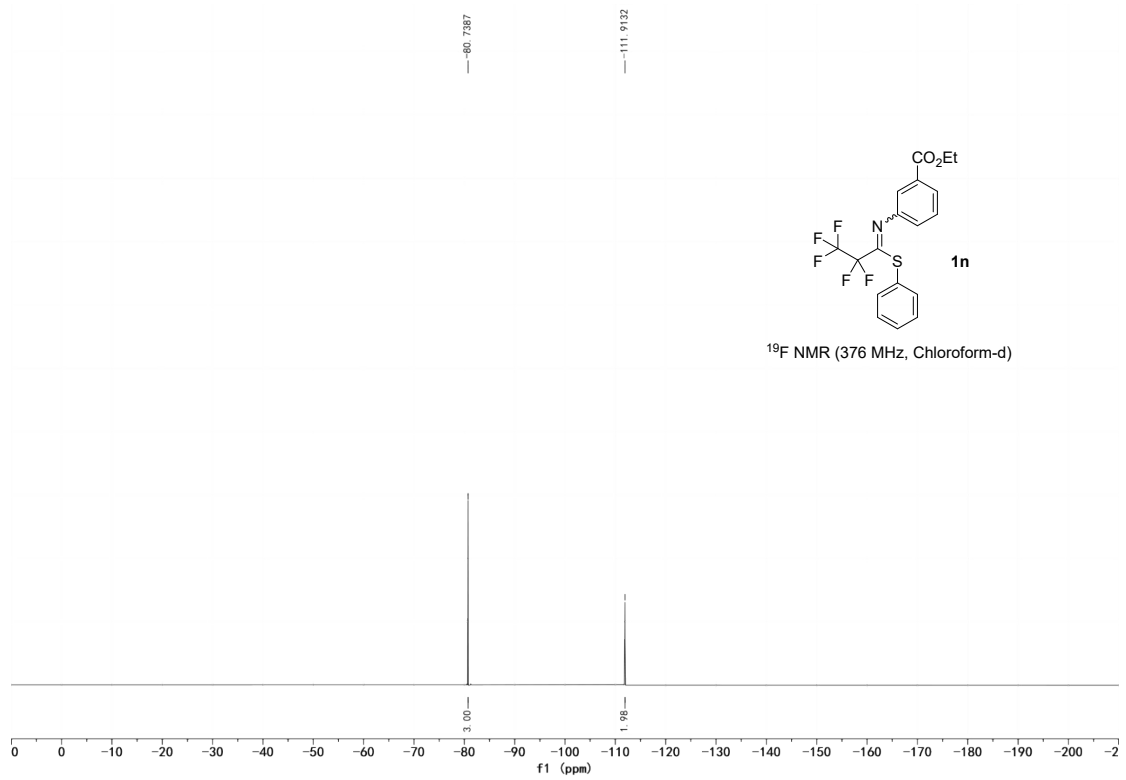

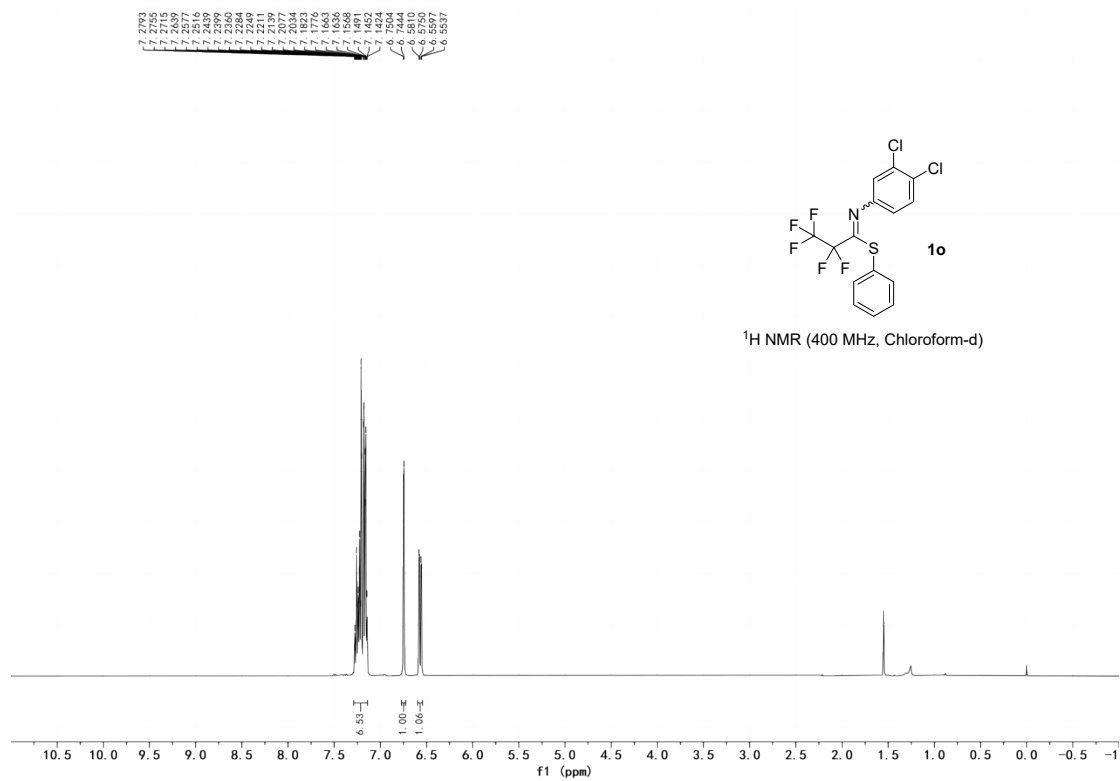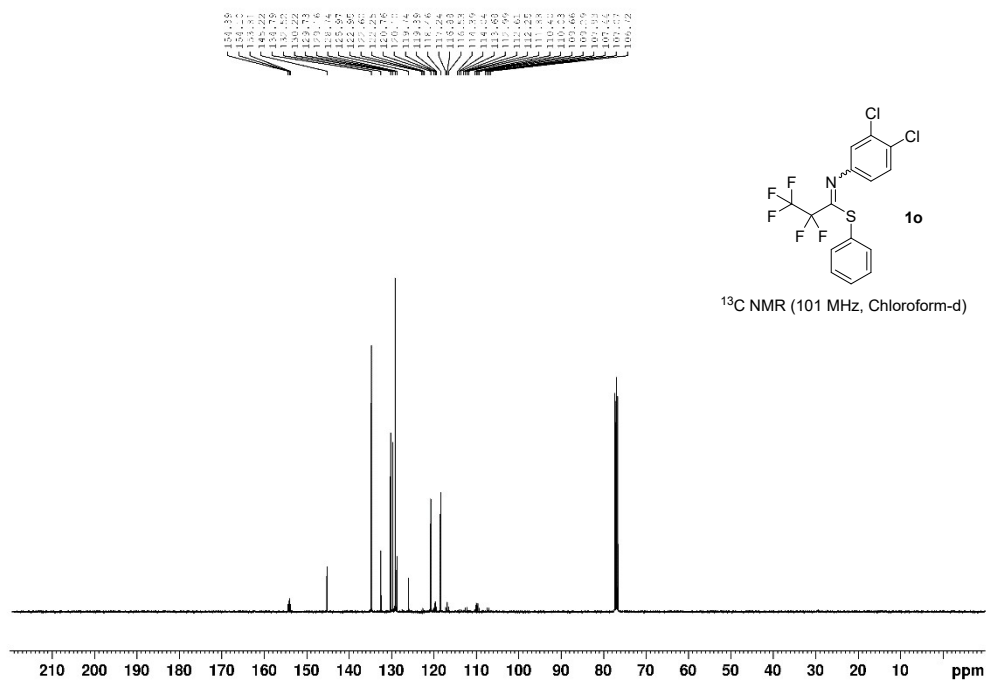

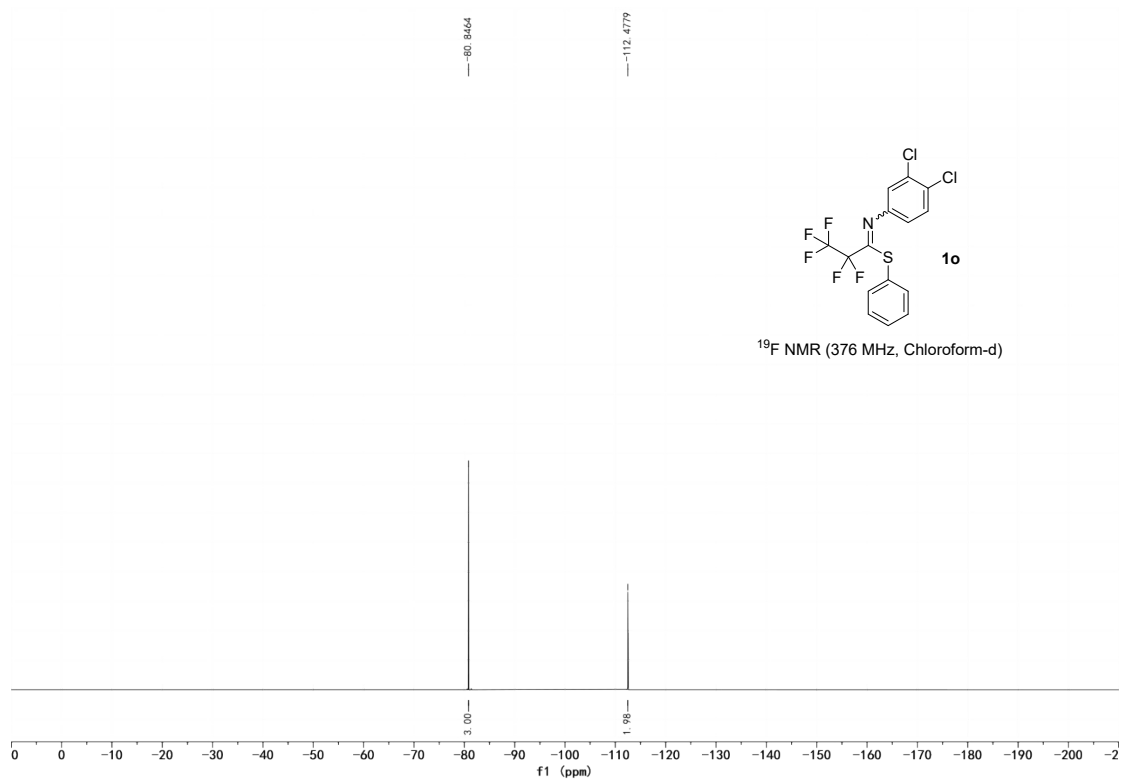



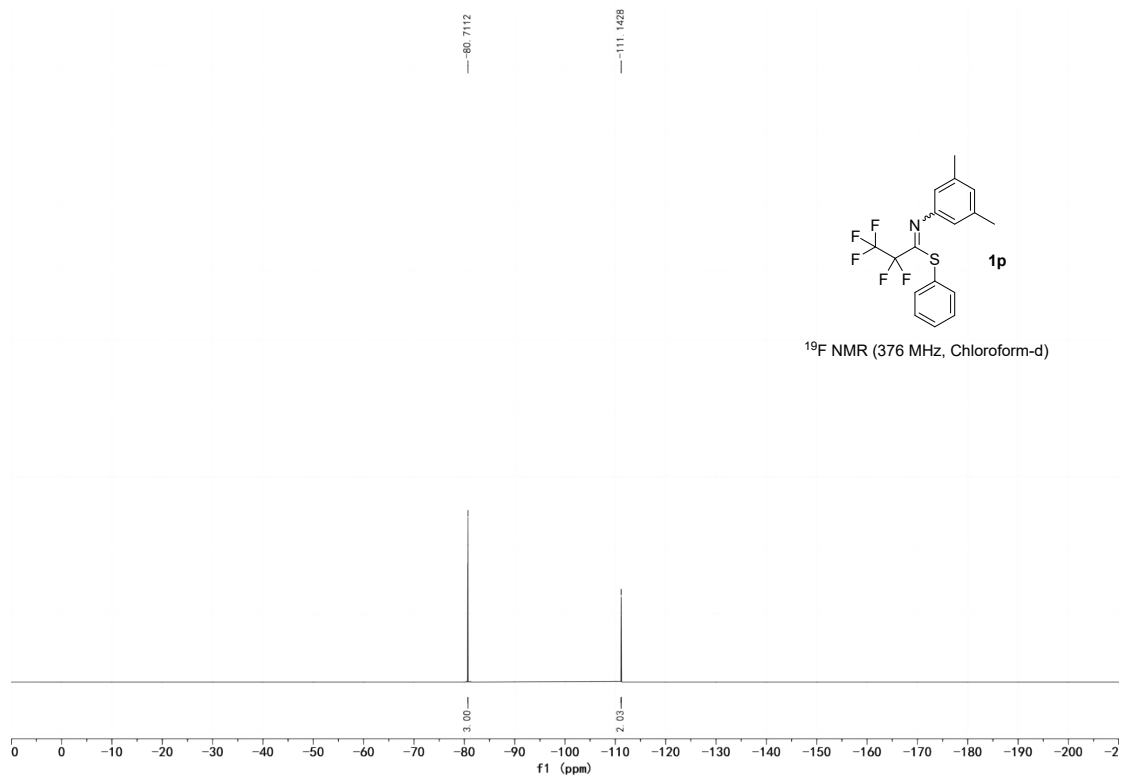

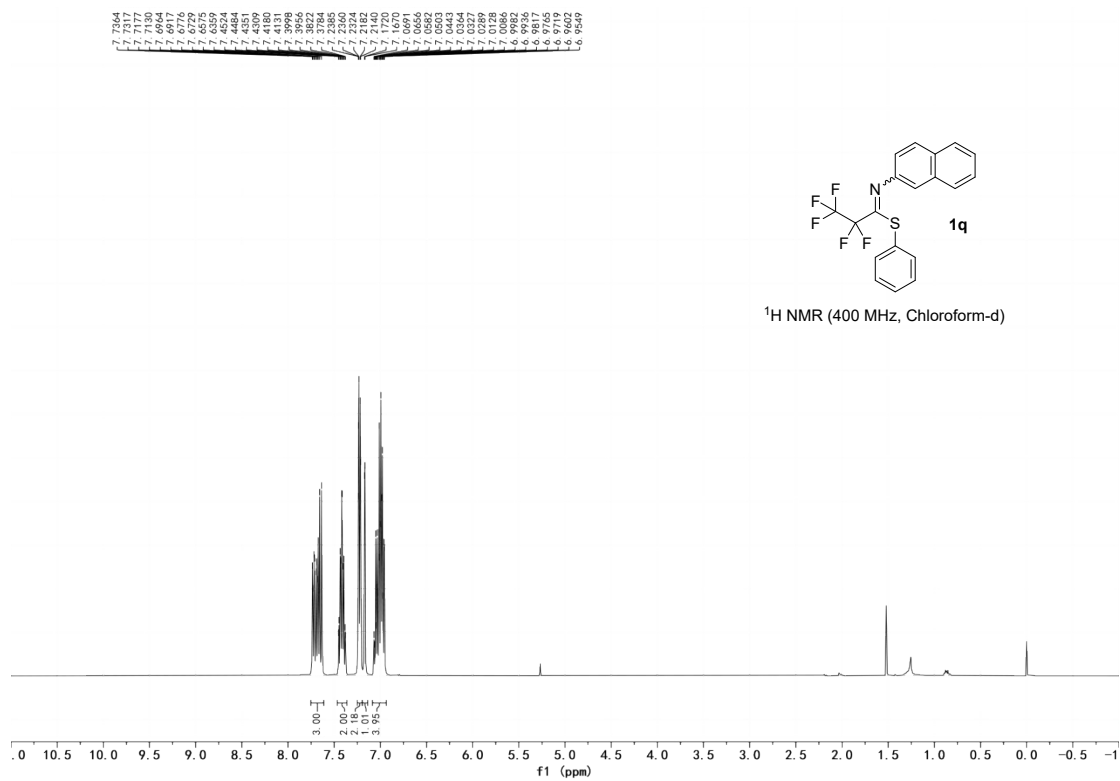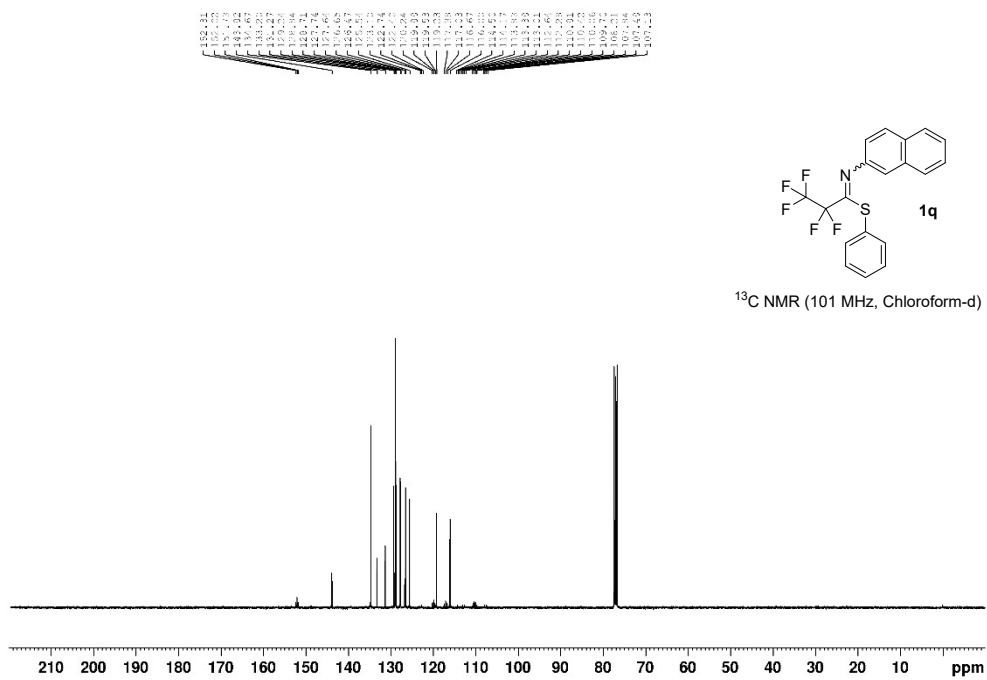



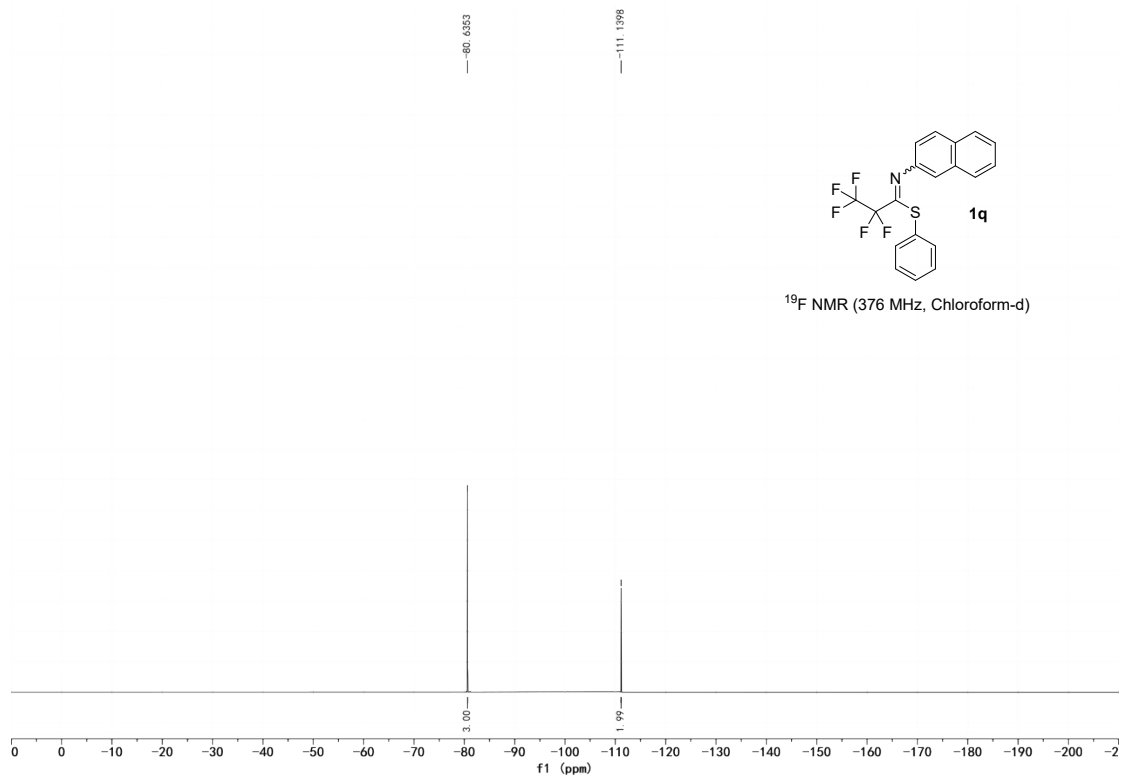

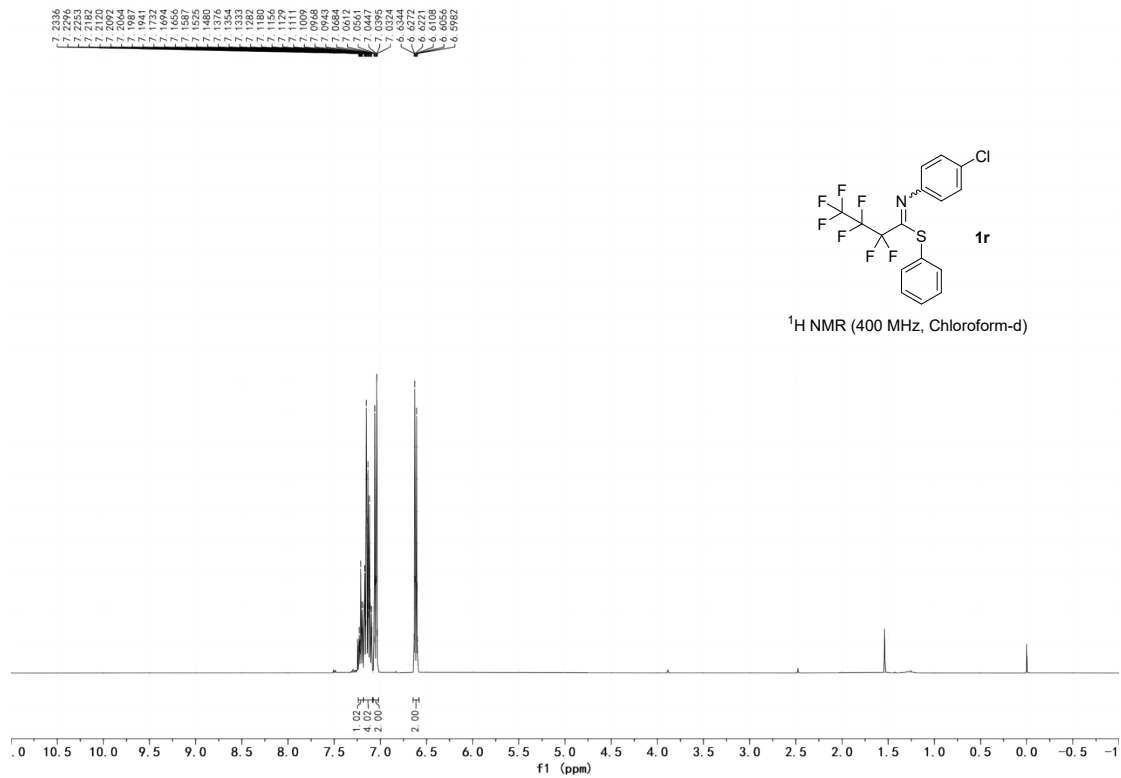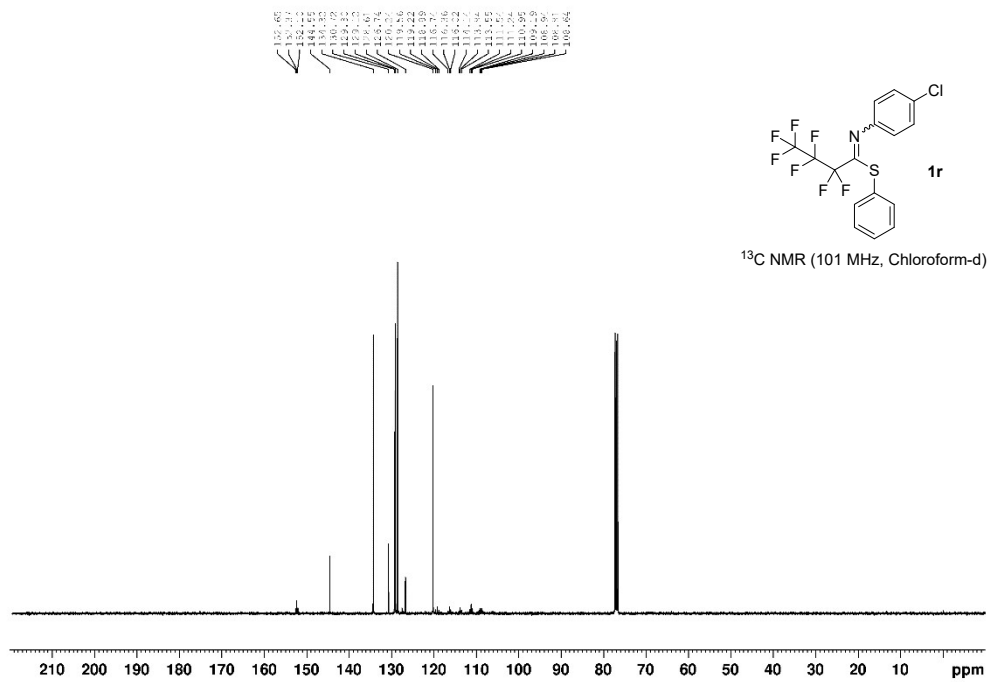

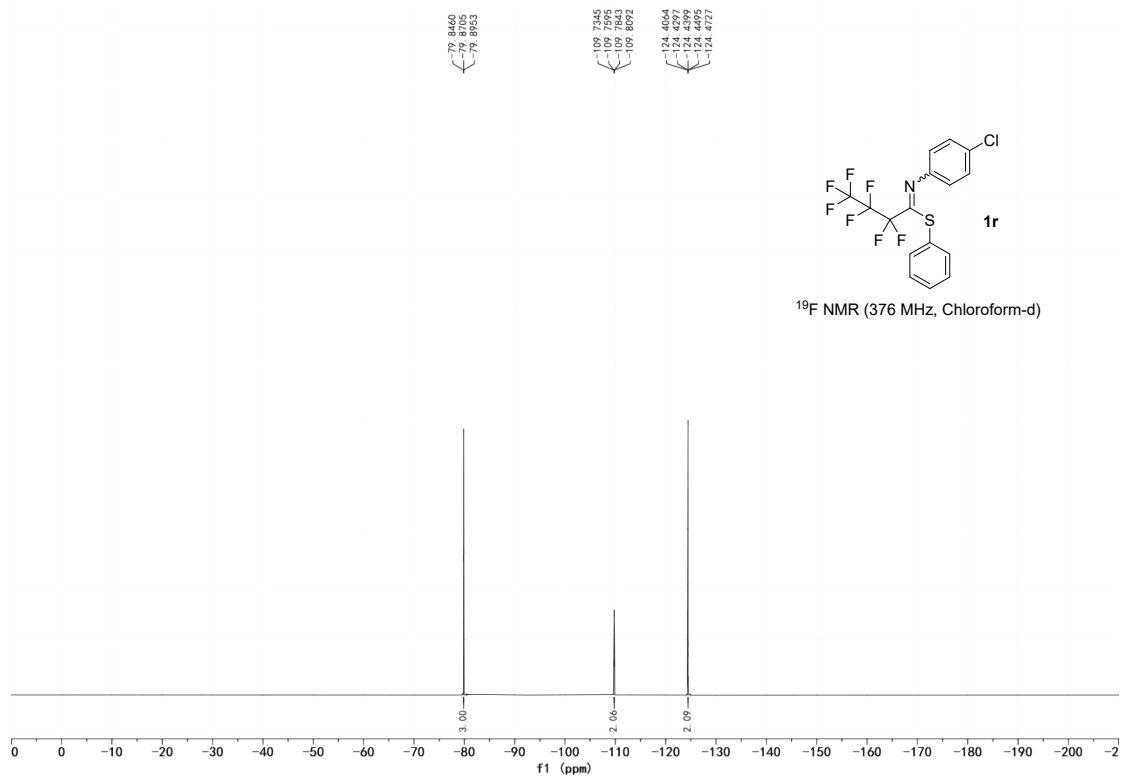

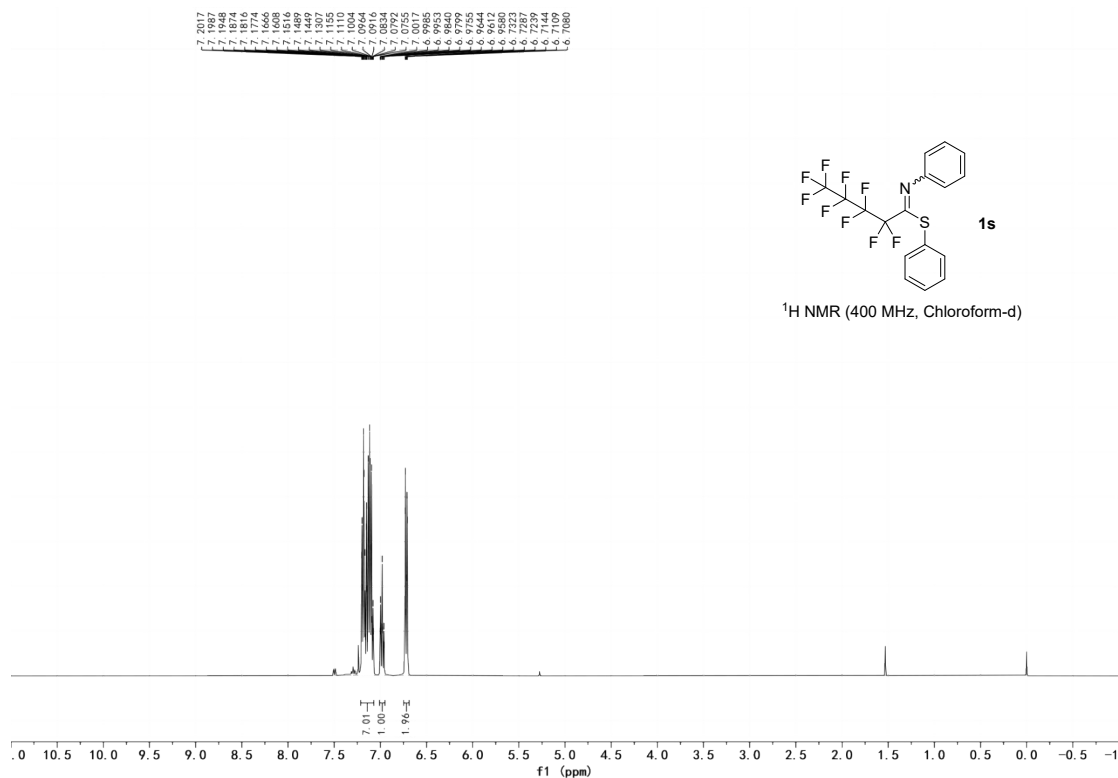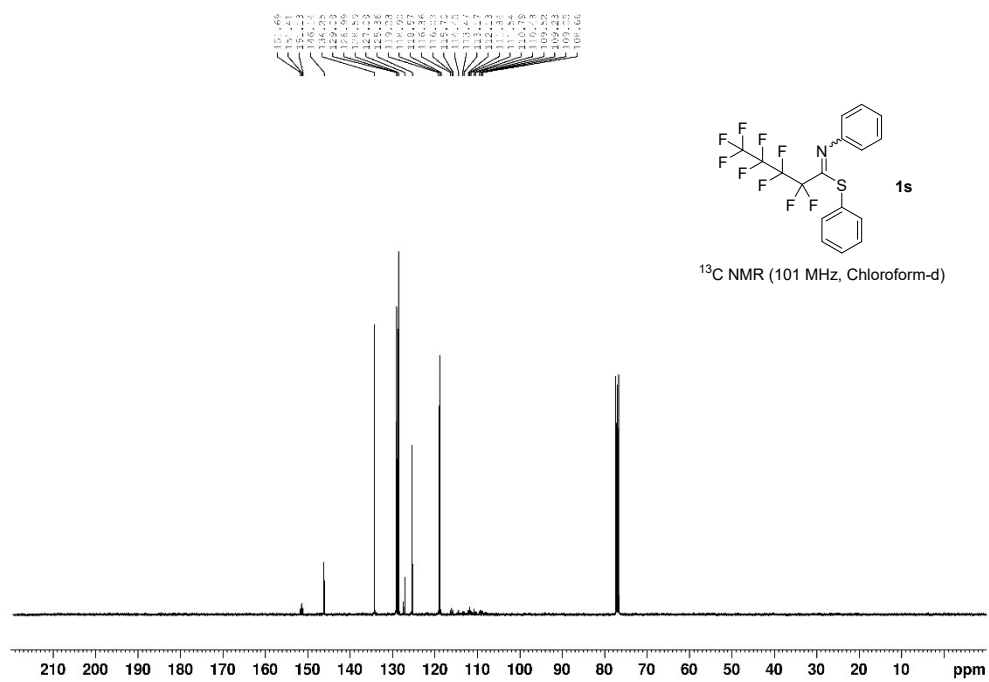

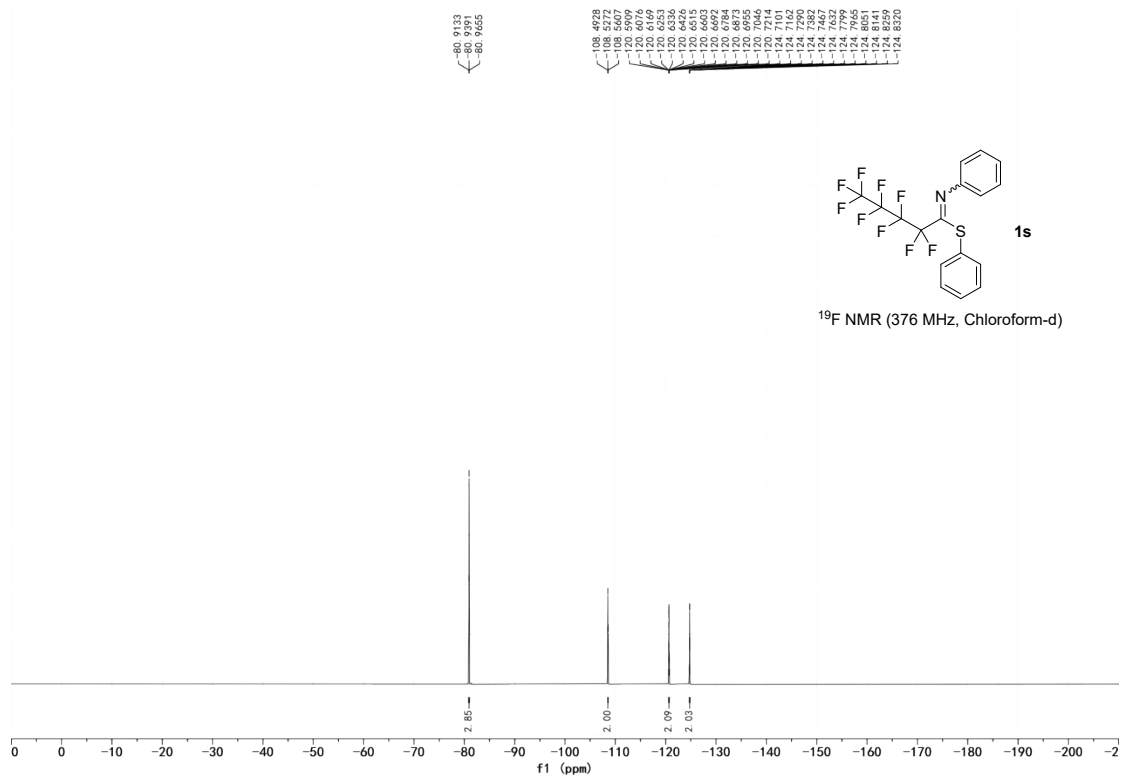

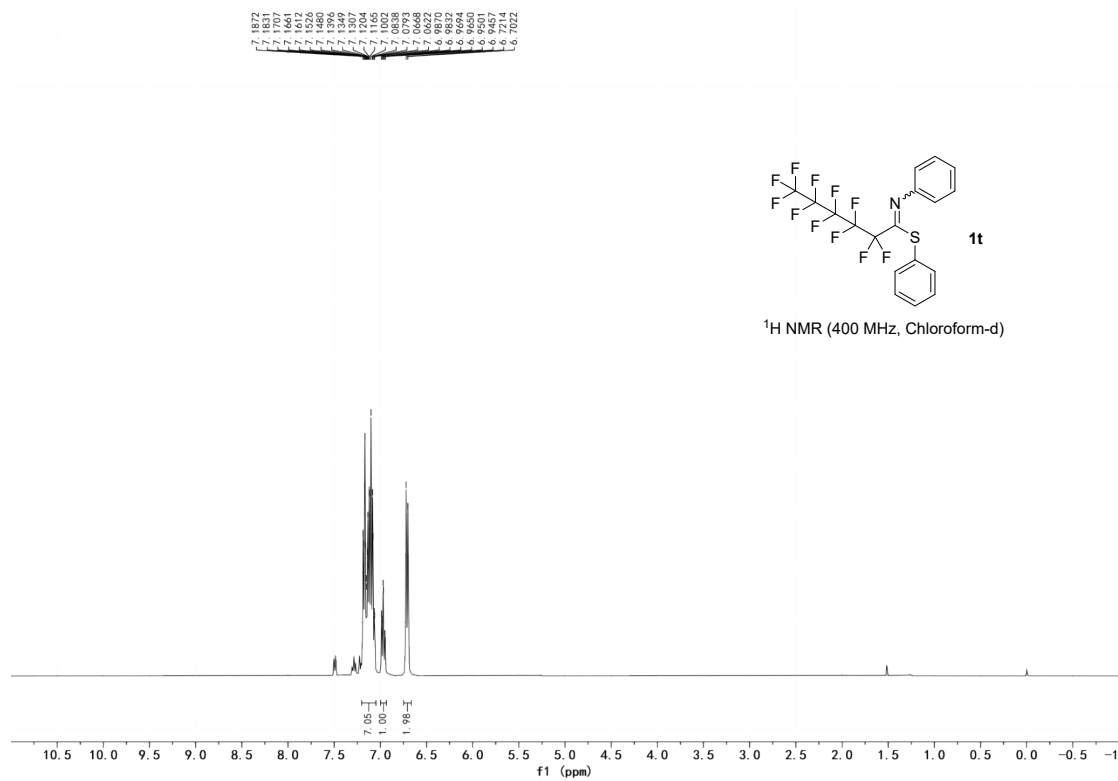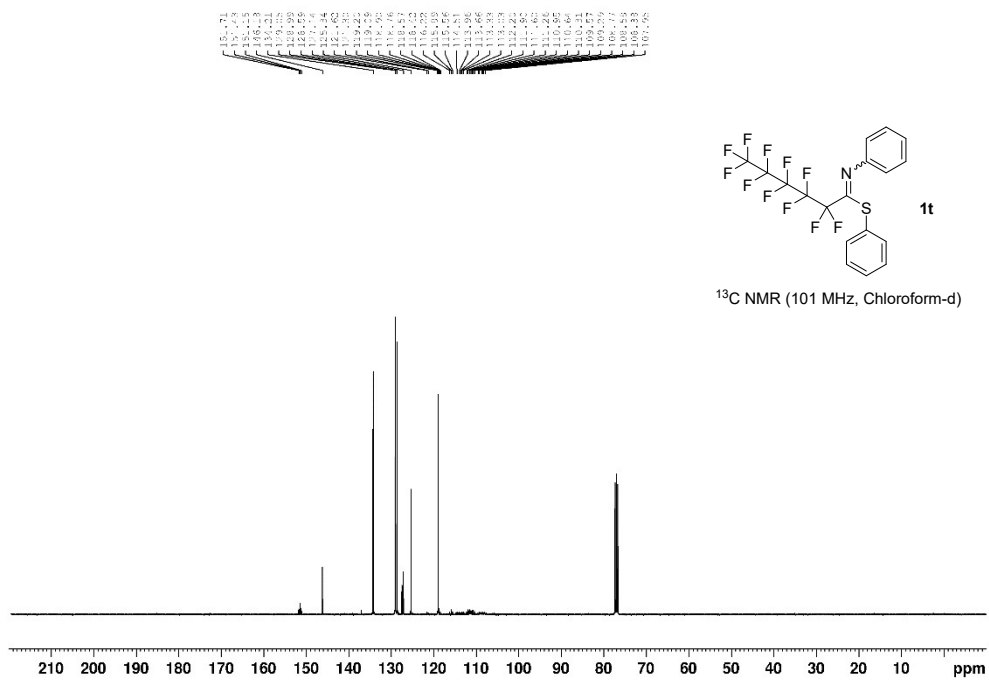

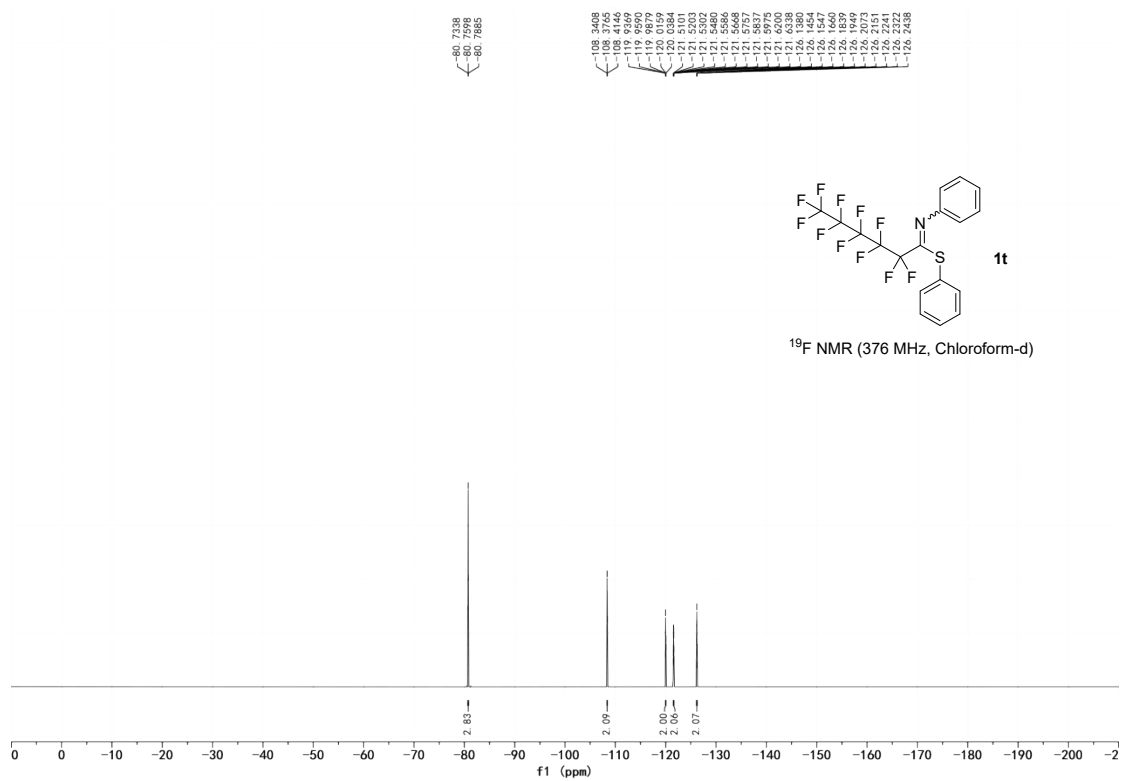

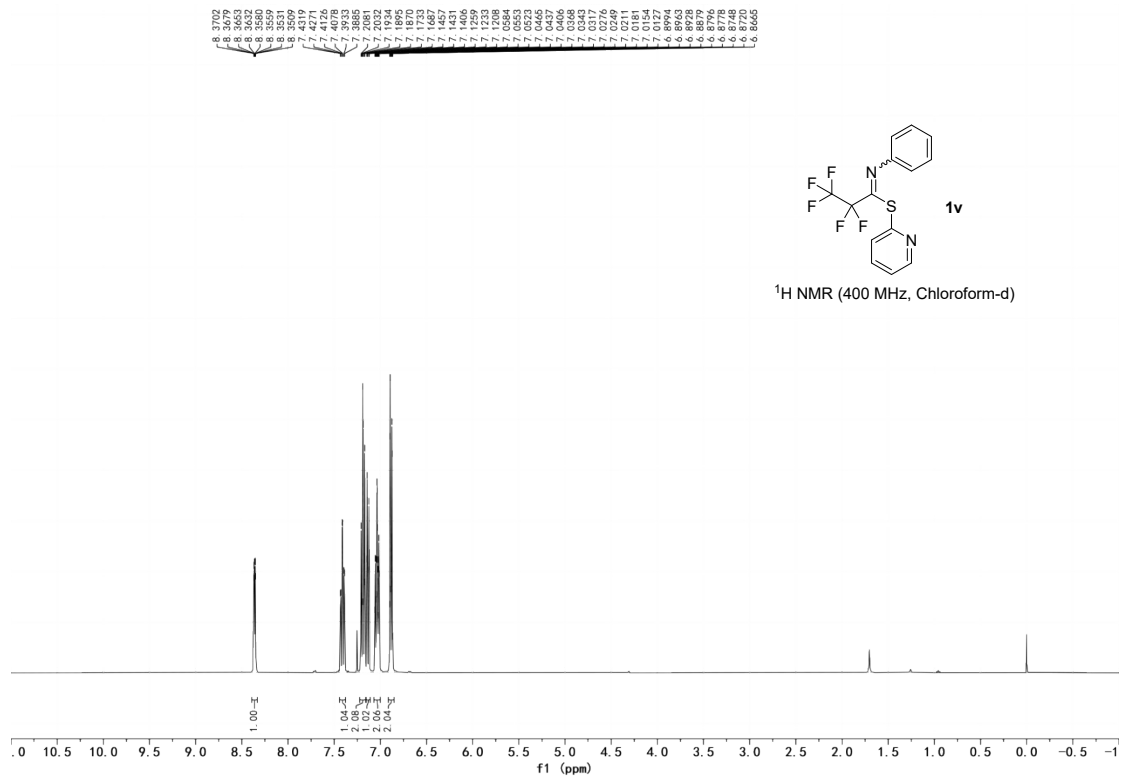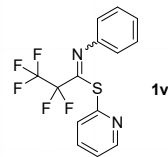

**1**H NMR (400 MHz, Chloroform-d)

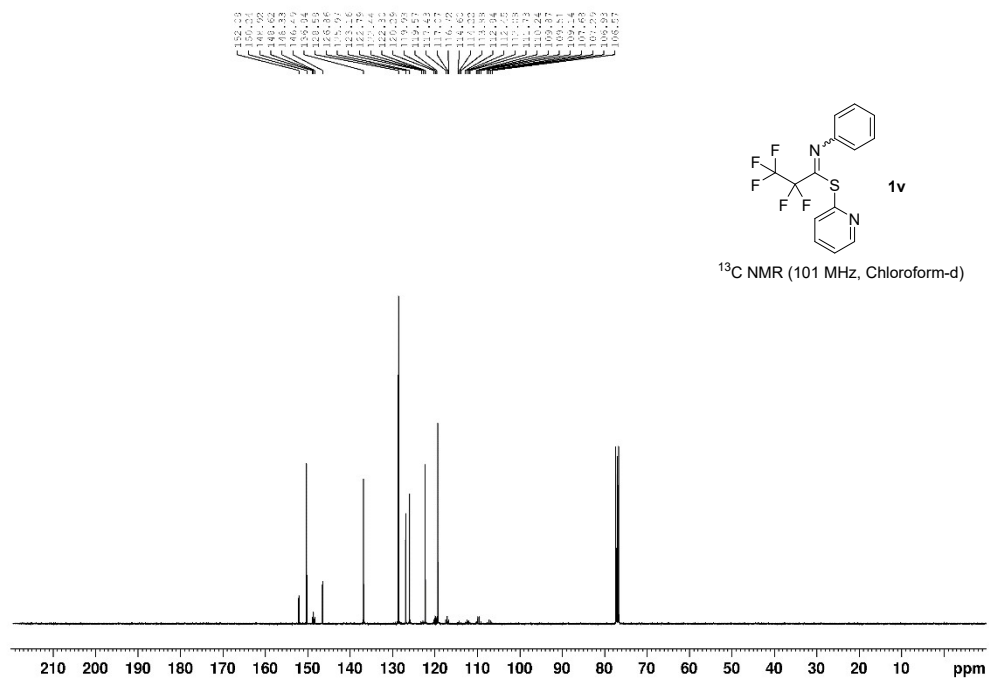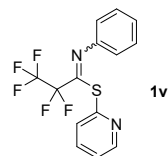

**13**C NMR (101 MHz, Chloroform-d)



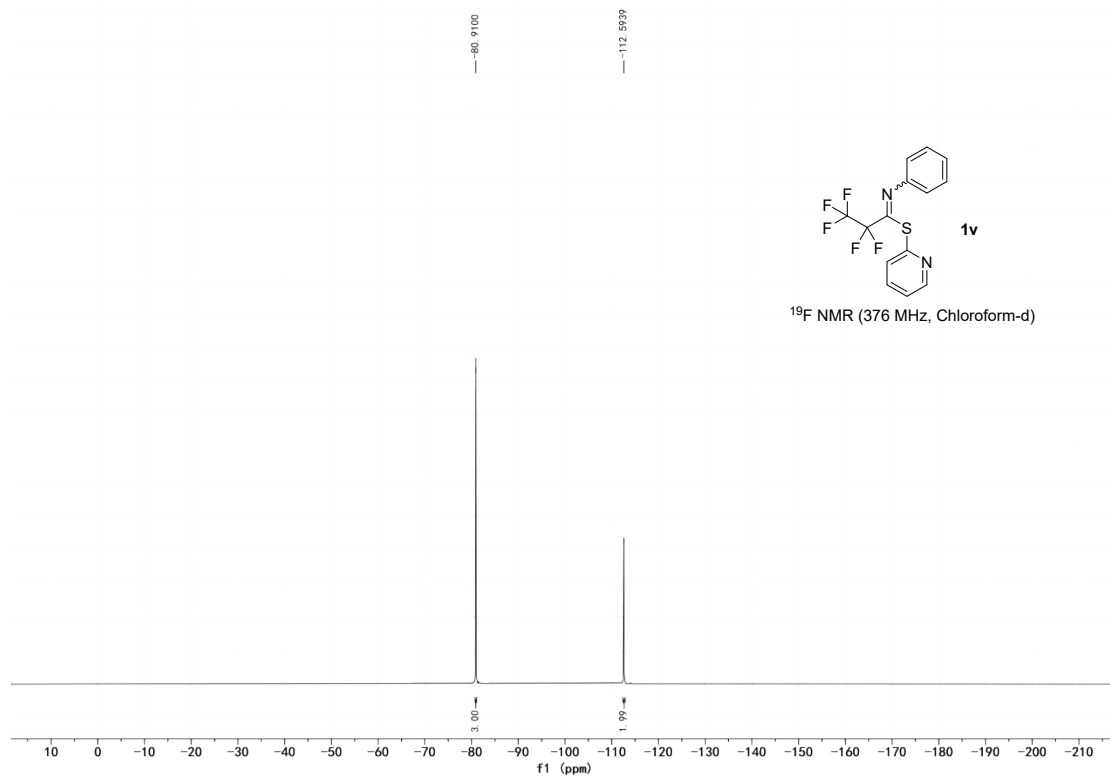

8.3530  
8.3417  
8.3375  
8.3103  
7.1967  
7.1907  
7.1763  
7.0110  
7.0080  
7.0049  
7.0034  
7.0094  
6.6657  
6.6507  
6.6375  
6.6325  
6.6140  
6.6117

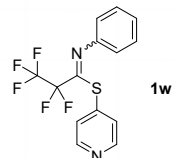

<sup>1</sup>H NMR (400 MHz, Chloroform-d)

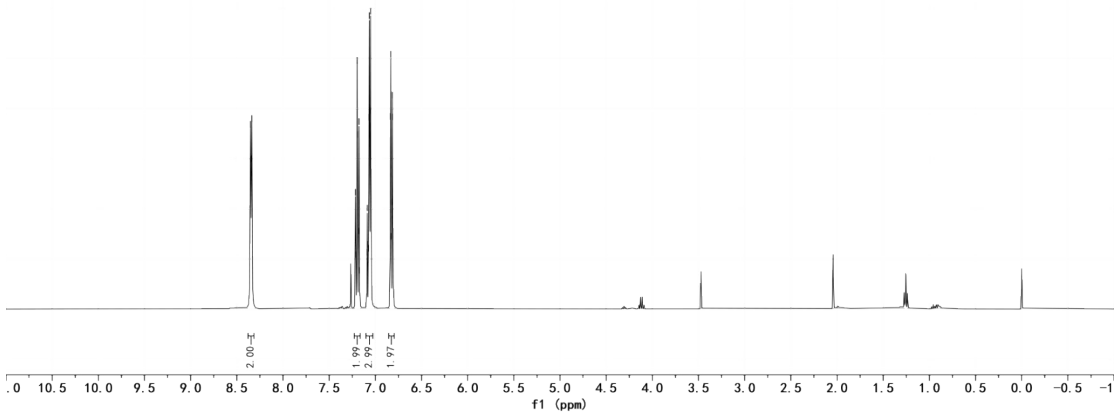

148.935  
148.75  
148.72  
148.132  
138.927  
138.834  
138.824  
138.395  
138.385  
138.376  
138.367  
138.358  
138.349  
138.340  
138.331  
138.322  
138.313  
138.304  
138.295  
138.286  
138.277  
138.268  
138.259  
138.250  
138.241  
138.232  
138.223  
138.214  
138.205  
138.196  
138.187  
138.178  
138.169  
138.160  
138.151  
138.142  
138.133  
138.124  
138.115  
138.106  
138.097  
138.088  
138.079  
138.070  
138.061  
138.052  
138.043  
138.034  
138.025  
138.016  
138.007  
138.000  
137.991  
137.982  
137.973  
137.964  
137.955  
137.946  
137.937  
137.928  
137.919  
137.910  
137.901  
137.892  
137.883  
137.874  
137.865  
137.856  
137.847  
137.838  
137.829  
137.820  
137.811  
137.802  
137.793  
137.784  
137.775  
137.766  
137.757  
137.748  
137.739  
137.730  
137.721  
137.712  
137.703  
137.694  
137.685  
137.676  
137.667  
137.658  
137.649  
137.640  
137.631  
137.622  
137.613  
137.604  
137.595  
137.586  
137.577  
137.568  
137.559  
137.550  
137.541  
137.532  
137.523  
137.514  
137.505  
137.496  
137.487  
137.478  
137.469  
137.460  
137.451  
137.442  
137.433  
137.424  
137.415  
137.406  
137.397  
137.388  
137.379  
137.370  
137.361  
137.352  
137.343  
137.334  
137.325  
137.316  
137.307  
137.298  
137.289  
137.280  
137.271  
137.262  
137.253  
137.244  
137.235  
137.226  
137.217  
137.208  
137.199  
137.190  
137.181  
137.172  
137.163  
137.154  
137.145  
137.136  
137.127  
137.118  
137.109  
137.100  
137.091  
137.082  
137.073  
137.064  
137.055  
137.046  
137.037  
137.028  
137.019  
137.010  
137.001  
136.992  
136.983  
136.974  
136.965  
136.956  
136.947  
136.938  
136.929  
136.920  
136.911  
136.902  
136.893  
136.884  
136.875  
136.866  
136.857  
136.848  
136.839  
136.830  
136.821  
136.812  
136.803  
136.794  
136.785  
136.776  
136.767  
136.758  
136.749  
136.740  
136.731  
136.722  
136.713  
136.704  
136.695  
136.686  
136.677  
136.668  
136.659  
136.650  
136.641  
136.632  
136.623  
136.614  
136.605  
136.596  
136.587  
136.578  
136.569  
136.560  
136.551  
136.542  
136.533  
136.524  
136.515  
136.506  
136.497  
136.488  
136.479  
136.470  
136.461  
136.452  
136.443  
136.434  
136.425  
136.416  
136.407  
136.398  
136.389  
136.380  
136.371  
136.362  
136.353  
136.344  
136.335  
136.326  
136.317  
136.308  
136.299  
136.290  
136.281  
136.272  
136.263  
136.254  
136.245  
136.236  
136.227  
136.218  
136.209  
136.200  
136.191  
136.182  
136.173  
136.164  
136.155  
136.146  
136.137  
136.128  
136.119  
136.110  
136.101  
136.092  
136.083  
136.074  
136.065  
136.056  
136.047  
136.038  
136.029  
136.020  
136.011  
136.002  
135.993  
135.984  
135.975  
135.966  
135.957  
135.948  
135.939  
135.930  
135.921  
135.912  
135.903  
135.894  
135.885  
135.876  
135.867  
135.858  
135.849  
135.840  
135.831  
135.822  
135.813  
135.804  
135.795  
135.786  
135.777  
135.768  
135.759  
135.750  
135.741  
135.732  
135.723  
135.714  
135.705  
135.696  
135.687  
135.678  
135.669  
135.660  
135.651  
135.642  
135.633  
135.624  
135.615  
135.606  
135.597  
135.588  
135.579  
135.570  
135.561  
135.552  
135.543  
135.534  
135.525  
135.516  
135.507  
135.498  
135.489  
135.480  
135.471  
135.462  
135.453  
135.444  
135.435  
135.426  
135.417  
135.408  
135.399  
135.390  
135.381  
135.372  
135.363  
135.354  
135.345  
135.336  
135.327  
135.318  
135.309  
135.300  
135.291  
135.282  
135.273  
135.264  
135.255  
135.246  
135.237  
135.228  
135.219  
135.210  
135.201  
135.192  
135.183  
135.174  
135.165  
135.156  
135.147  
135.138  
135.129  
135.120  
135.111  
135.102  
135.093  
135.084  
135.075  
135.066  
135.057  
135.048  
135.039  
135.030  
135.021  
135.012  
135.003  
134.994  
134.985  
134.976  
134.967  
134.958  
134.949  
134.940  
134.931  
134.922  
134.913  
134.904  
134.895  
134.886  
134.877  
134.868  
134.859  
134.850  
134.841  
134.832  
134.823  
134.814  
134.805  
134.796  
134.787  
134.778  
134.769  
134.760  
134.751  
134.742  
134.733  
134.724  
134.715  
134.706  
134.697  
134.688  
134.679  
134.670  
134.661  
134.652  
134.643  
134.634  
134.625  
134.616  
134.607  
134.598  
134.589  
134.580  
134.571  
134.562  
134.553  
134.544  
134.535  
134.526  
134.517  
134.508  
134.499  
134.490  
134.481  
134.472  
134.463  
134.454  
134.445  
134.436  
134.427  
134.418  
134.409  
134.400  
134.391  
134.382  
134.373  
134.364  
134.355  
134.346  
134.337  
134.328  
134.319  
134.310  
134.301  
134.292  
134.283  
134.274  
134.265  
134.256  
134.247  
134.238  
134.229  
134.220  
134.211  
134.202  
134.193  
134.184  
134.175  
134.166  
134.157  
134.148  
134.139  
134.130  
134.121  
134.112  
134.103  
134.094  
134.085  
134.076  
134.067  
134.058  
134.049  
134.040  
134.031  
134.022  
134.013  
134.004  
133.995  
133.986  
133.977  
133.968  
133.959  
133.950  
133.941  
133.932  
133.923  
133.914  
133.905  
133.896  
133.887  
133.878  
133.869  
133.860  
133.851  
133.842  
133.833  
133.824  
133.815  
133.806  
133.797  
133.788  
133.779  
133.770  
133.761  
133.752  
133.743  
133.734  
133.725  
133.716  
133.707  
133.698  
133.689  
133.680  
133.671  
133.662  
133.653  
133.644  
133.635  
133.626  
133.617  
133.608  
133.599  
133.590  
133.581  
133.572  
133.563  
133.554  
133.545  
133.536  
133.527  
133.518  
133.509  
133.500  
133.491  
133.482  
133.473  
133.464  
133.455  
133.446  
133.437  
133.428  
133.419  
133.410  
133.401  
133.392  
133.383  
133.374  
133.365  
133.356  
133.347  
133.338  
133.329  
133.320  
133.311  
133.302  
133.293  
133.284  
133.275  
133.266  
133.257  
133.248  
133.239  
133.230  
133.221  
133.212  
133.203  
133.194  
133.185  
133.176  
133.167  
133.158  
133.149  
133.140  
133.131  
133.122  
133.113  
133.104  
133.095  
133.086  
133.077  
133.068  
133.059  
133.050  
133.041  
133.032  
133.023  
133.014  
133.005  
132.996  
132.987  
132.978  
132.969  
132.960  
132.951  
132.942  
132.933  
132.924  
132.915  
132.906  
132.897  
132.888  
132.879  
132.870  
132.861  
132.852  
132.843  
132.834  
132.825  
132.816  
132.807  
132.798  
132.789  
132.780  
132.771  
132.762  
132.753  
132.744  
132.735  
132.726  
132.717  
132.708  
132.699  
132.690  
132.681  
132.672  
132.663  
132.654  
132.645  
132.636  
132.627  
132.618  
132.609  
132.600  
132.591  
132.582  
132.573  
132.564  
132.555  
132.546  
132.537  
132.528  
132.519  
132.510  
132.501  
132.492  
132.483  
132.474  
132.465  
132.456  
132.447  
132.438  
132.429  
132.420  
132.411  
132.402  
132.393  
132.384  
132.375  
132.366  
132.357  
132.348  
132.339  
132.330  
132.321  
132.312  
132.303  
132.294  
132.285  
132.276  
132.267  
132.258  
132.249  
132.240  
132.231  
132.222  
132.213  
132.204  
132.195  
132.186  
132.177  
132.168  
132.159  
132.150  
132.141  
132.132  
132.123  
132.114  
132.105  
132.096  
132.087  
132.078  
132.069  
132.060  
132.051  
132.042  
132.033  
132.024  
132.015  
132.006  
131.997  
131.988  
131.979  
131.970  
131.961  
131.952  
131.943  
131.934  
131.925  
131.916  
131.907  
131.898  
131.889  
131.880  
131.871  
131.862  
131.853  
131.844  
131.835  
131.826  
131.817  
131.808  
131.799  
131.790  
131.781  
131.772  
131.763  
131.754  
131.745  
131.736  
131.727  
131.718  
131.709  
131.700  
131.691  
131.682  
131.673  
131.664  
131.655  
131.646  
131.637  
131.628  
131.619  
131.610  
131.601  
131.592  
131.583  
131.574  
131.565  
131.556  
131.547  
131.538  
131.529  
131.520  
131.511  
131.502  
131.493  
131.484  
131.475  
131.466  
131.457  
131.448  
131.439  
131.430  
131.421  
131.412  
131.403  
131.394  
131.385  
131.376  
131.367  
131.358  
131.349  
131.340  
131.331  
131.322  
131.313  
131.304  
131.295  
131.286  
131.277  
131.268  
131.259  
131.250  
131.241  
131.232  
131.223  
131.214  
131.205  
131.196  
131.187  
131.178  
131.169  
131.160  
131.151  
131.142  
131.133  
131.124  
131.115  
131.106  
131.097  
131.088  
131.079  
131.070  
131.061  
131.052  
131.043  
131.034  
131.025  
131.016  
131.007  
131.000  
130.991  
130.982  
130.973  
130.964  
130.955  
130.946  
130.937  
130.928  
130.919  
130.910  
130.901  
130.892  
130.883  
130.874  
130.865  
130.856  
130.847  
130.838  
130.829  
130.820  
130.811  
130.802  
130.793  
130.784  
130.775  
130.766  
130.757  
130.748  
130.739  
130.730  
130.721  
130.712  
130.703  
130.694  
130.685  
130.676  
130.667  
130.658  
130.649  
130.640  
130.631  
130.622  
130.613  
130.604  
130.595  
130.586  
130.577  
130.568  
130.559  
130.550  
130.541  
130.532  
130.523  
130.514  
130.505  
130.496  
130.487  
130.478  
130.469  
130.460  
130.451  
130.442  
130.433  
130.424  
130.415  
130.406  
130.397  
130.388  
130.379  
130.370  
130.361  
130.352  
130.343  
130.334  
130.325  
130.316  
130.307  
130.298  
130.289  
130.280  
130.271  
130.262  
130.253  
130.244  
130.235  
130.226  
130.217  
130.208  
130.199  
130.190  
130.181  
130.172  
130.163  
130.154  
130.145  
130.136  
130.127  
130.118  
130.109  
130.100  
130.091  
130.082  
130.073  
130.064  
130.055  
130.046  
130.037  
130.028  
130.019  
130.010  
130.001  
129.992  
129.983  
129.974  
129.965  
129.956  
129.947  
129.938  
129.929  
129.920  
129.911  
129.902  
129.893  
129.884  
129.875  
129.866  
129.857  
129.848  
129.839  
129.830  
129.821  
129.812  
129.803  
129.794  
129.785  
129.776  
129.767  
129.758  
129.749  
129.740  
129.731  
129.722  
129.713  
129.704  
129.695  
129.686  
129.677  
129.668  
129.659  
129.650  
129.641  
129.632  
129.623  
129.614  
129.605  
129.596  
129.587  
129.578  
129.569  
129.560  
129.551  
129.542  
129.533  
129.524  
129.515  
129.506  
129.497  
129.488  
129.479  
129.470  
129.461  
129.452  
129.443  
129.434  
129.425  
129.416  
129.407  
129.398  
129.389  
129.380  
129.371  
129.362  
129.353  
129.344  
129.335  
129.326  
129.317  
129.308  
129.299  
129.290  
129.281  
129.272  
129.263  
129.254  
129.245  
129.236  
129.227  
129.218  
129.209  
129.200  
129.191  
129.182  
129.173  
129.164  
129.155  
129.146  
129.137  
129.128  
129.119  
129.110  
129.101  
129.092  
129.083  
129.074  
129.065  
129.056  
129.047  
129.038  
129.029  
129.020  
129.011  
129.002  
128.993  
128.984  
128.975  
128.966  
128.957  
128.948  
128.939  
128.930  
128.921  
128.912  
128.903  
128.894  
128.885  
128.876  
128.867  
128.858  
128.849  
128.840  
128.831  
128.822  
128.813  
128.804  
128.795  
128.786  
128.777  
128.768  
128.759  
128.750  
128.741  
128.732  
128.723  
128.714  
128.705  
128.696  
128.687  
128.678  
128.669  
128.660  
128.651  
128.642  
128.633  
128.624  
128.615  
128.606  
128.597  
128.588  
128.579  
128.570  
128.561  
128.552  
128.543  
128.534  
128.525  
128.516  
128.507  
128.498  
128.489  
128.480  
128.471  
128.462  
128.453  
128.444  
128.435  
128.426  
128.417  
128.408  
128.399  
128.390  
128.381  
128.372  
128.363  
128.354  
128.345  
128.336  
128.327  
128.318  
128.309  
128.300  
128.291  
128.282  
128.273  
128.264  
128.255  
128.246  
128.237  
128.228  
128.219  
128.210  
128.201  
128.192  
128.183  
128.174  
128.165  
128.156  
128.147  
128.138  
128.129  
128.120  
128.111  
128.102  
128.093  
128.084  
128.075  
128.066  
128.057  
128.048  
128.039  
128.030  
128.021  
128.012  
128.003  
127.994  
127.985  
127.976  
127.967  
127.958  
127.949  
127.940  
127.931  
127.922  
127.913  
127.904  
127.895  
127.886  
127.877  
127.868  
127.859  
127.850  
127.841  
127.832  
127.823  
127.814  
127.805  
127.796  
127.787  
127.778  
127.769  
127.760  
127.751  
127.742  
127.733  
127.724  
127.715  
127.706  
127.697  
127.688  
127.679  
127.670  
127.661  
127.652  
127.643  
127.634  
127.625  
127.616  
127.607  
127.598  
127.589  
127.580  
127.571  
127.562  
127.553  
127.544  
127.535  
127.526  
127.517  
127.508  
127.499  
127.490  
127.481  
127.472  
127.463  
127.454  
127.445  
127.436  
127.427  
127.418  
127.409  
127.400  
127.391  
127.382  
127.373  
127.364  
127.355  
127.346  
127.337  
127.328  
127.319  
127.310  
127.301  
127.292  
127.283  
127.274  
127.265  
127.256  
127.247  
127.238  
127.229  
127.220  
127.211  
127.202  
127.193  
127.184  
127.175  
127.166  
127.157  
127.148  
127.139  
127.130  
127.121  
127.112  
127.103  
127.094  
127.085  
127.076  
127.067  
127.058  
127.049  
127.040  
127.031  
127.022  
127.013  
127.004  
126.995  
126.986  
126.977  
126.968  
126.959  
126.950  
126.941  
126.932  
126.923  
126.914  
126.905  
126.896  
126.887  
126.878  
126.869  
126.860  
126.851  
126.842  
126.833  
126.824  
126.815  
126.806  
126.797  
126.788  
126.779  
126.770  
126.761  
126.752  
126.743  
126.734  
126.725  
126.716  
126.707  
126.698  
126.689  
126.680  
126.671  
126.662  
126.653  
126.644  
126.635  
126.626  
126.617  
126.608  
126.599  
126.590  
126.581  
126.572  
126.563  
126

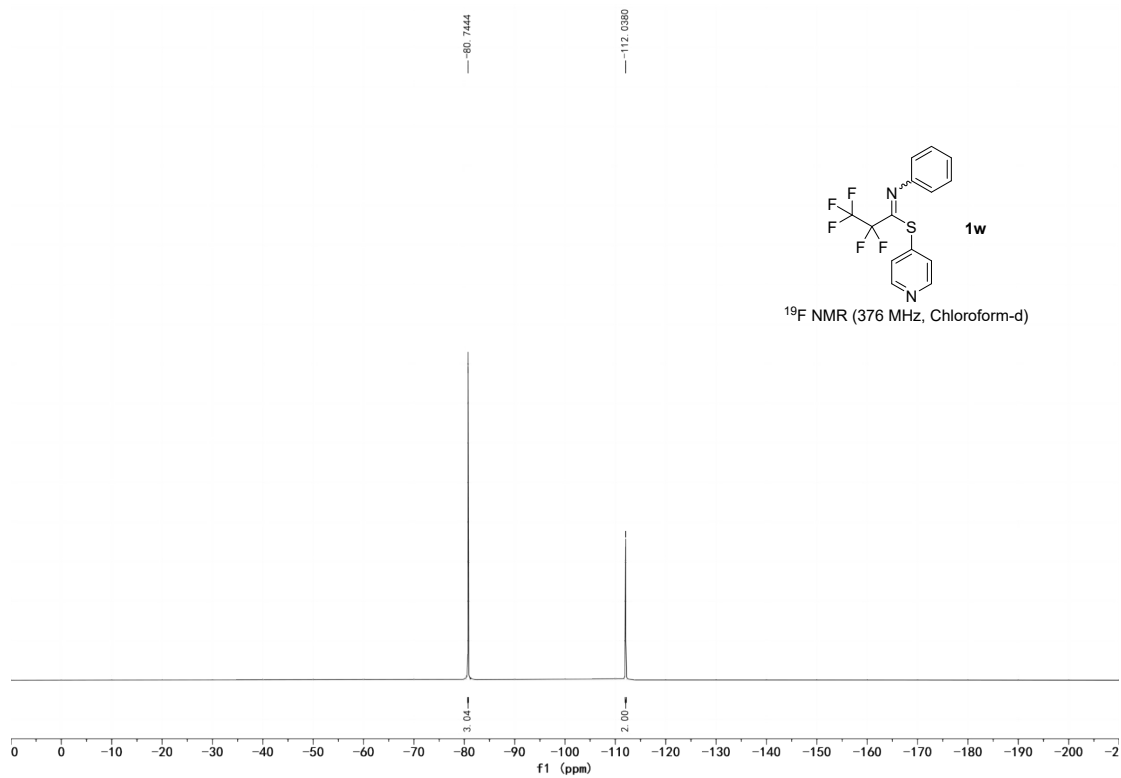



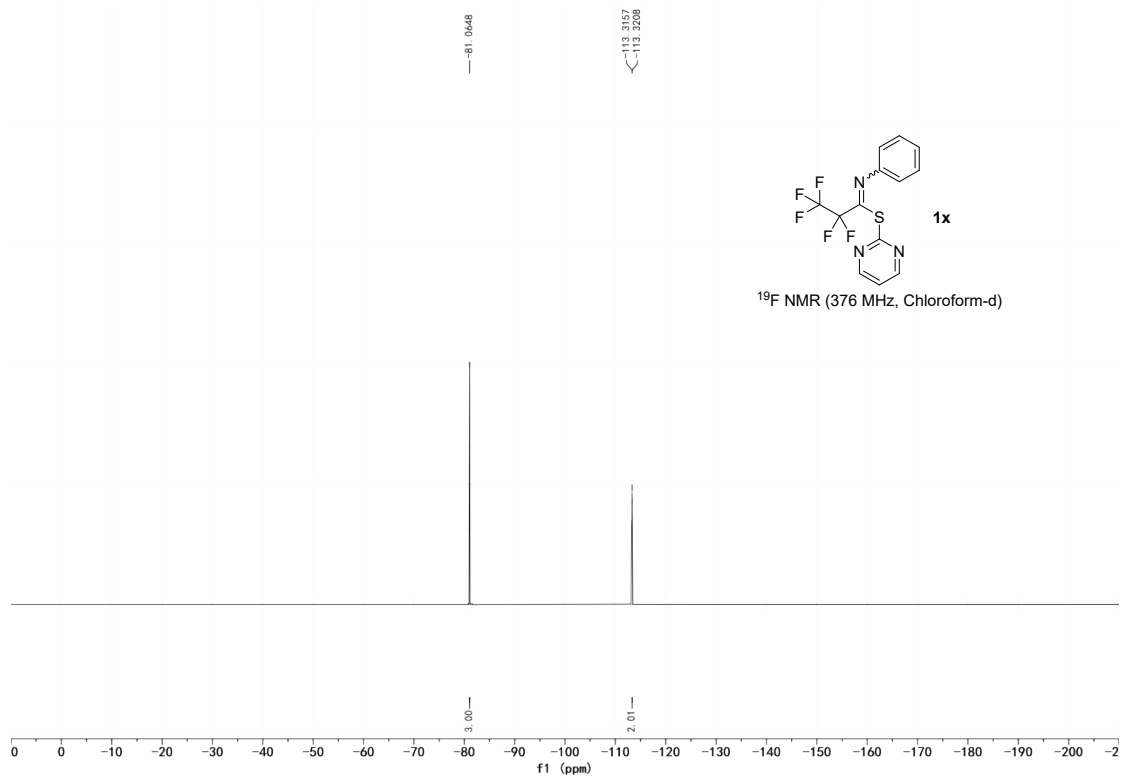

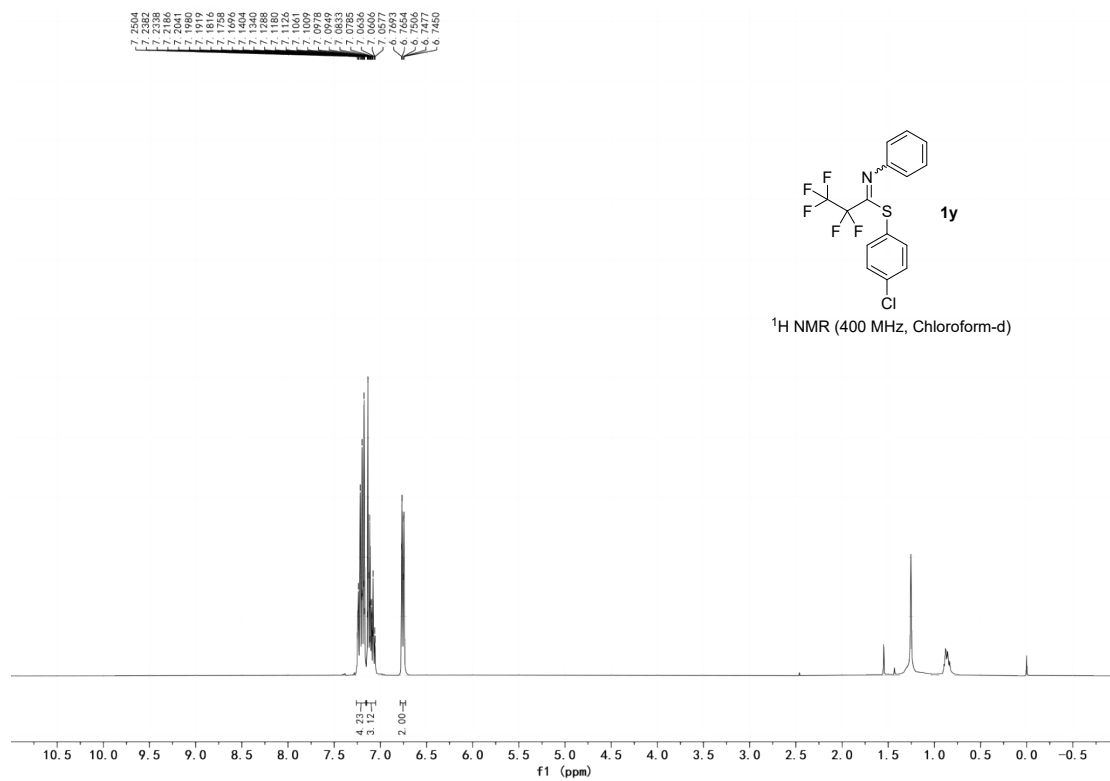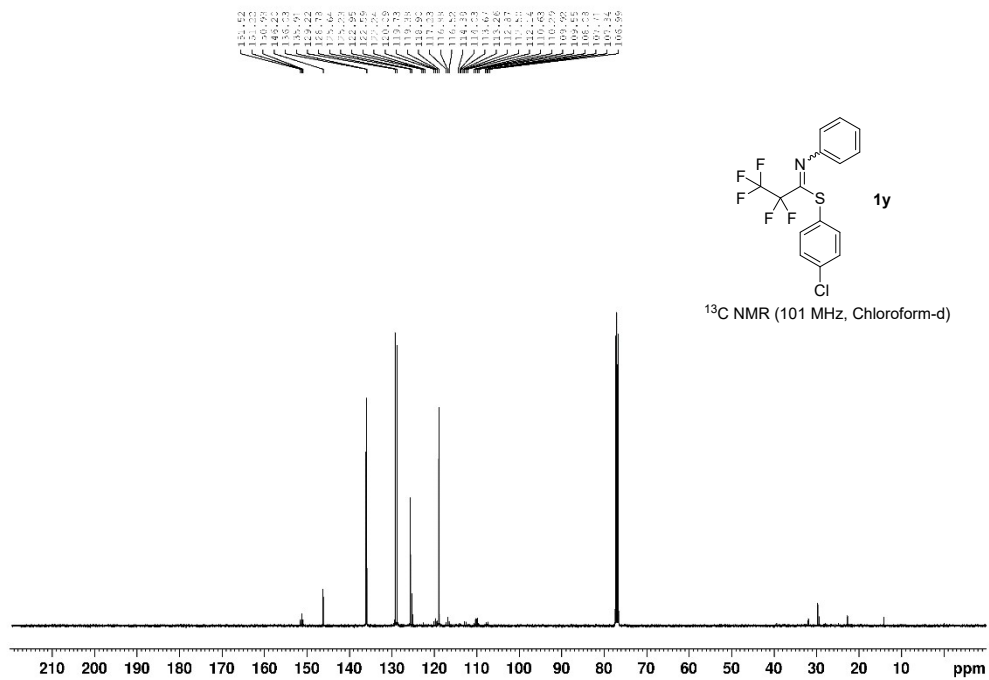

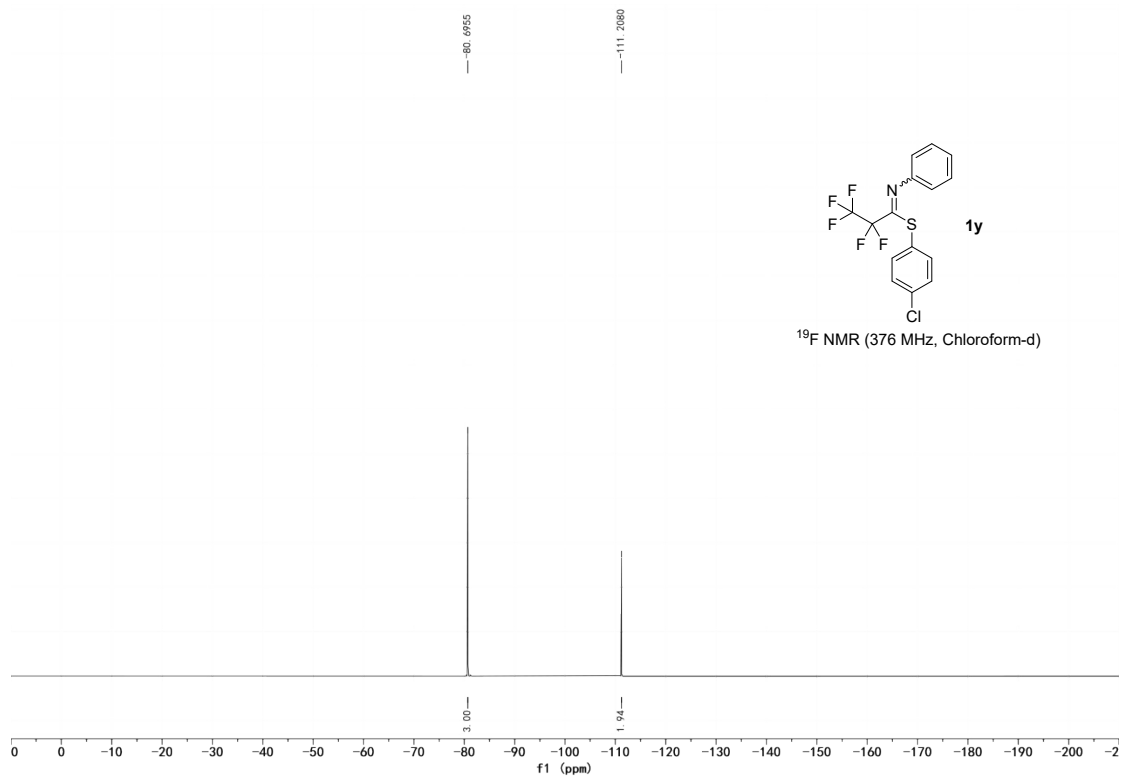

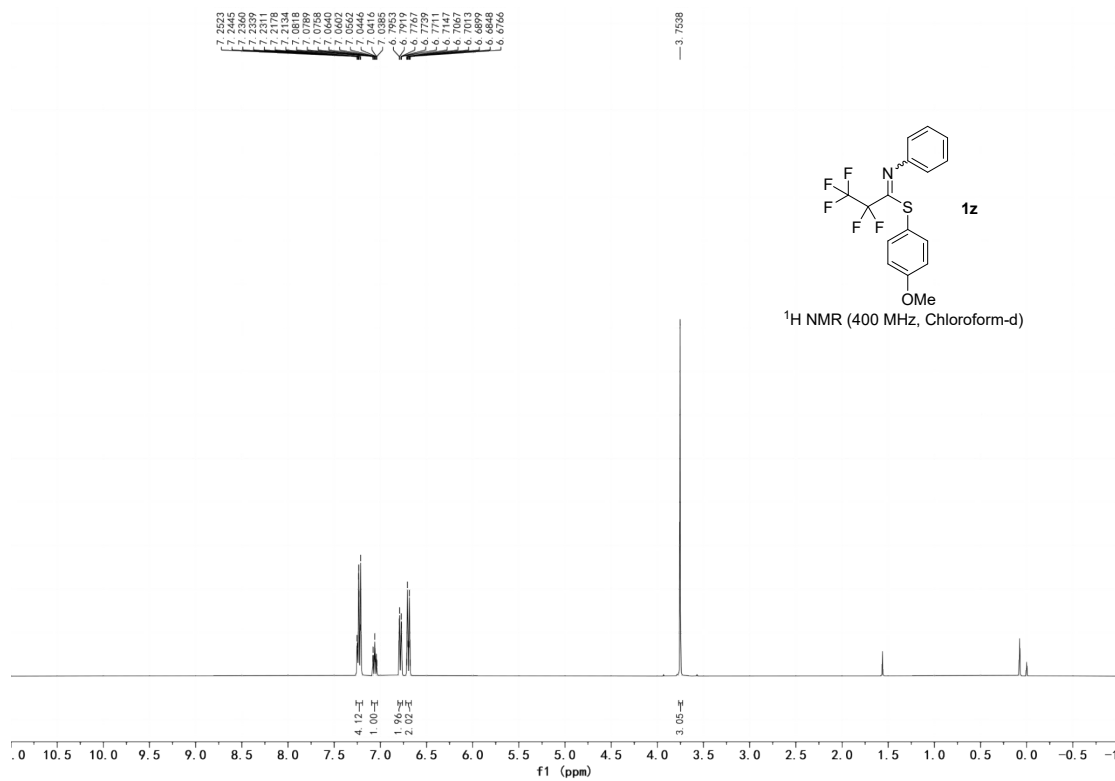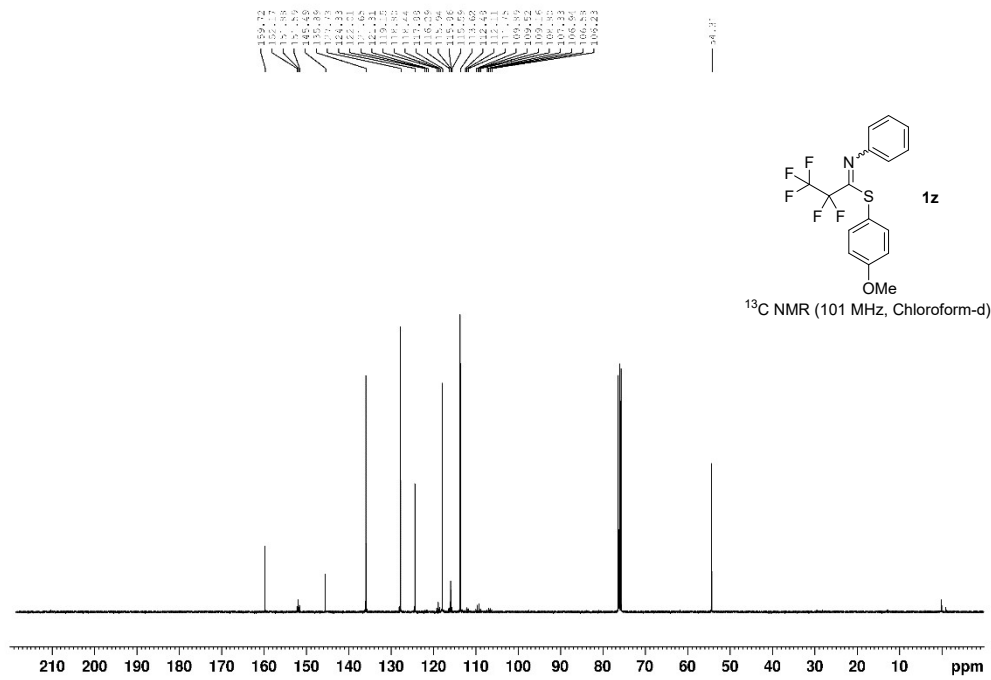



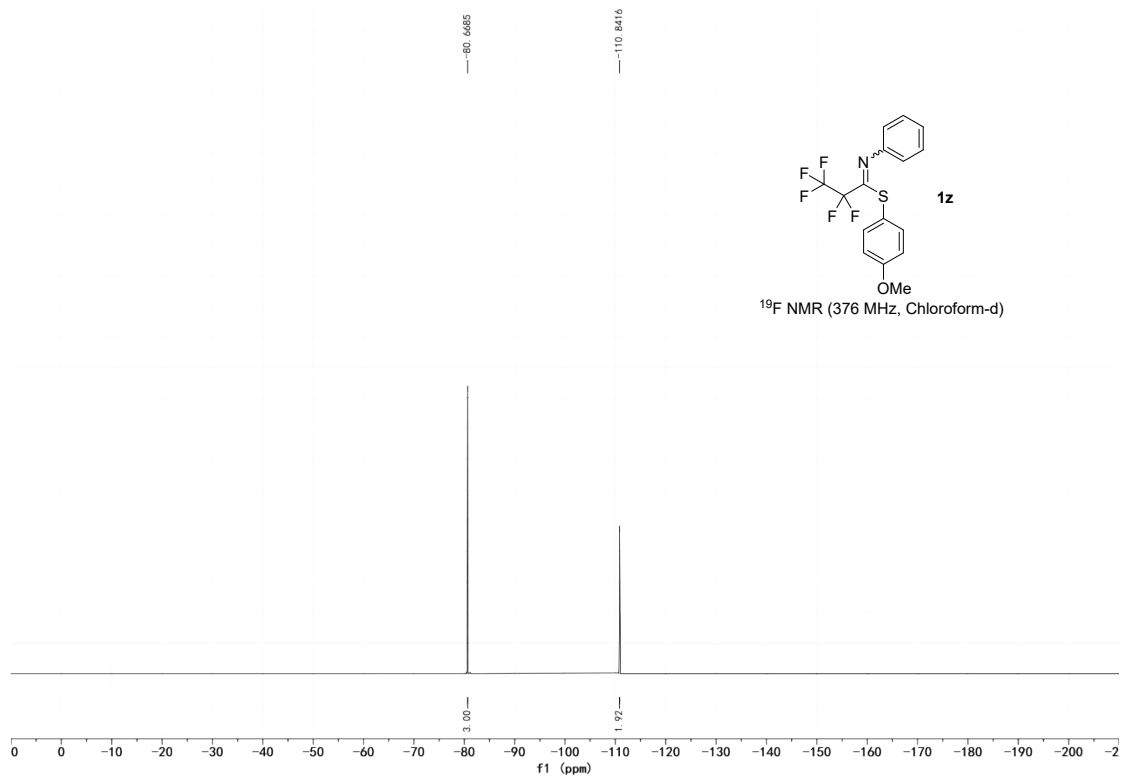

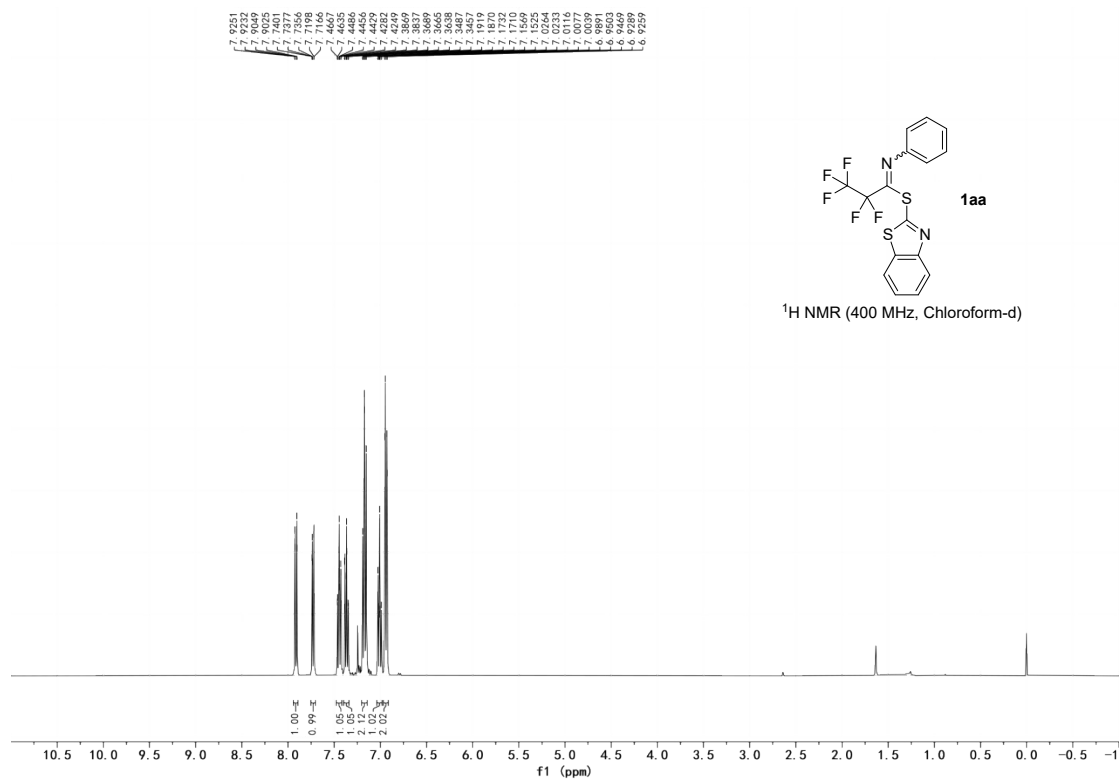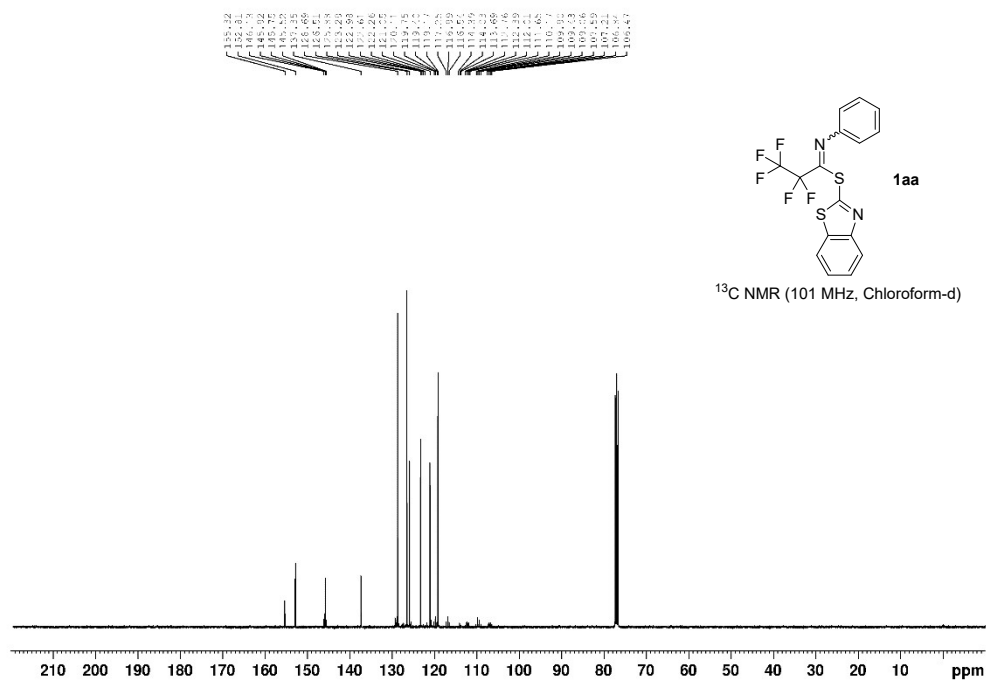

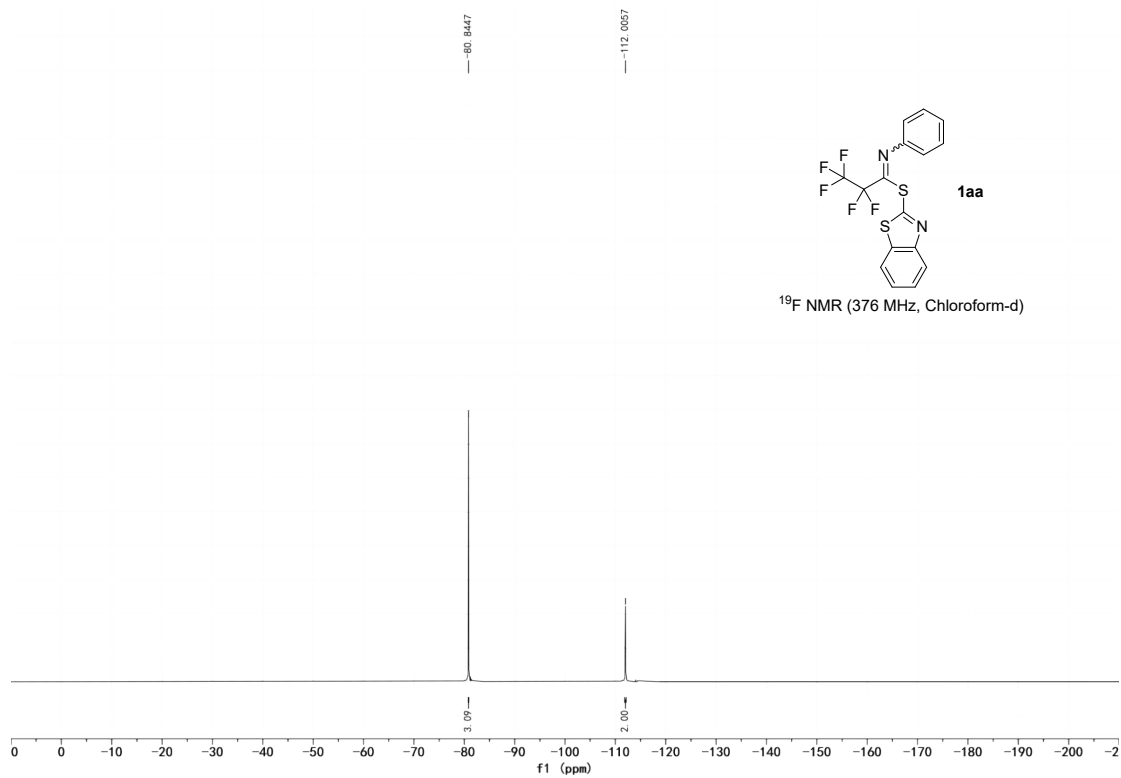

## NMR Spectra of the Products



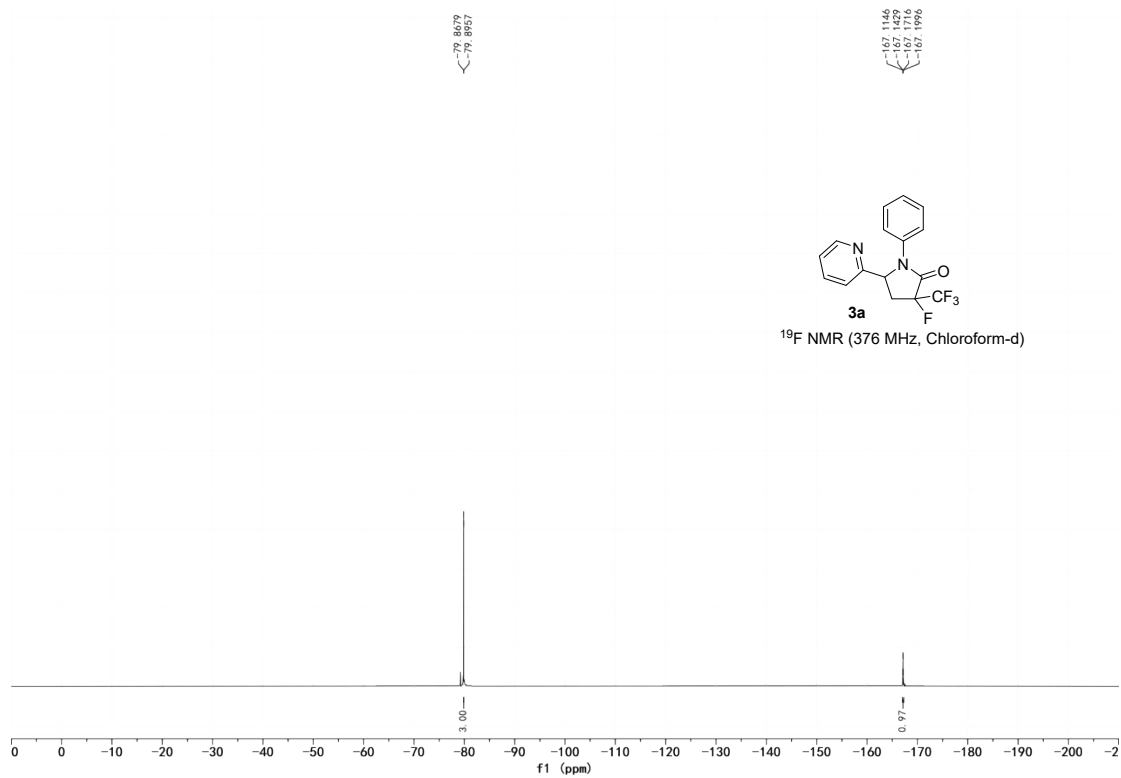

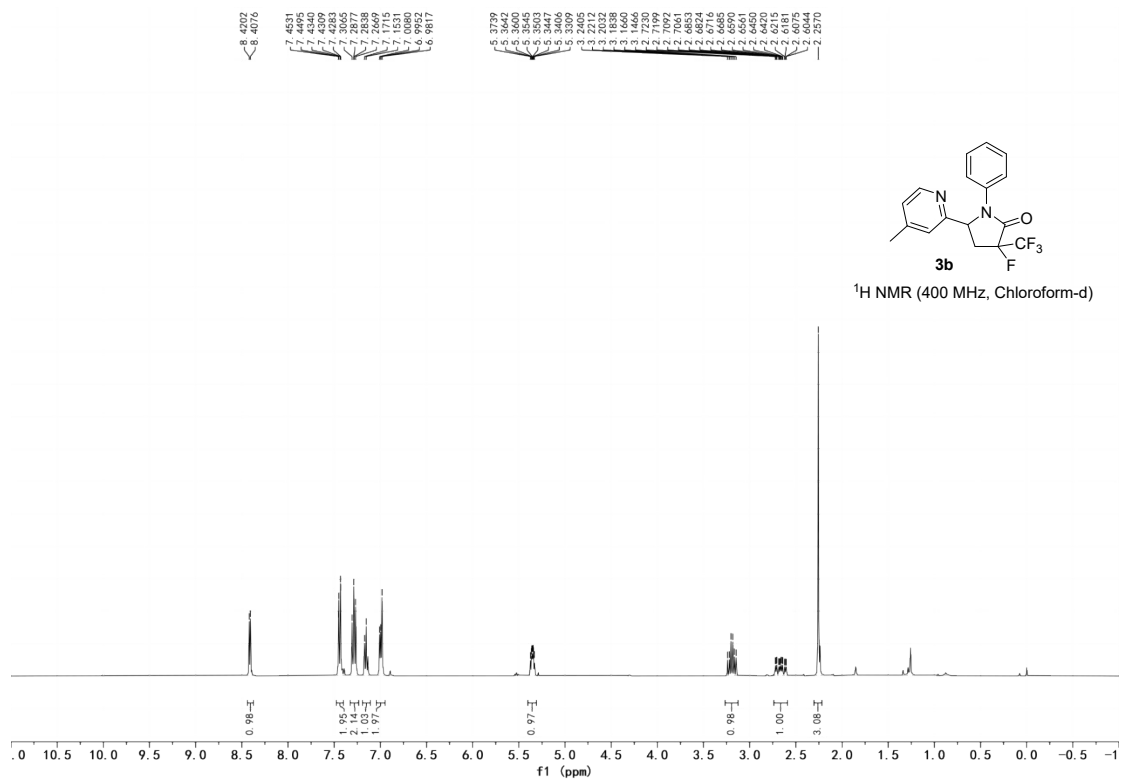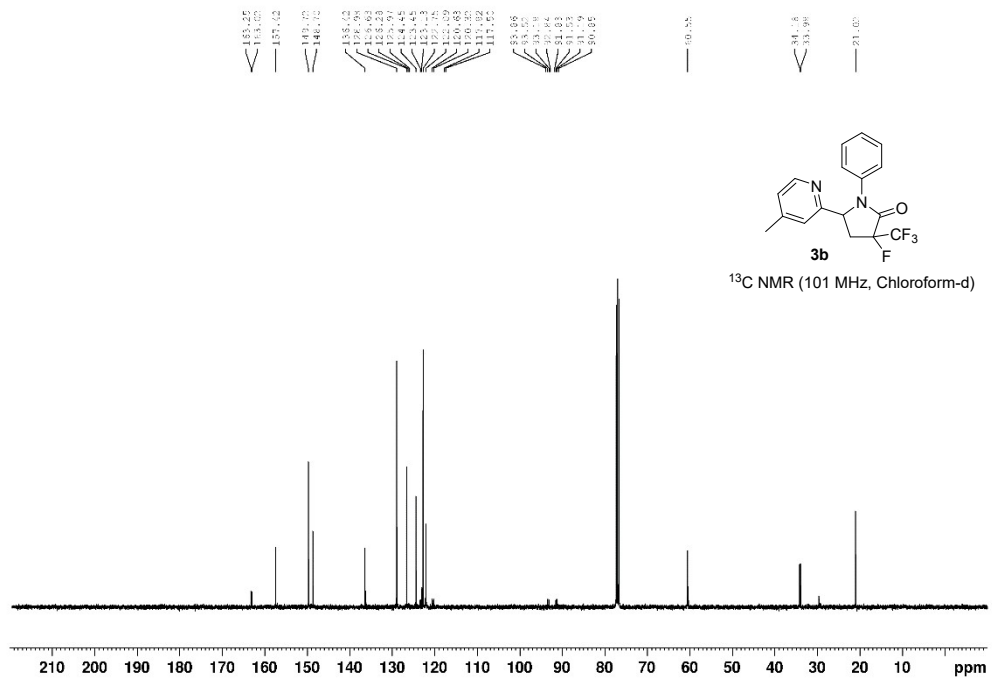

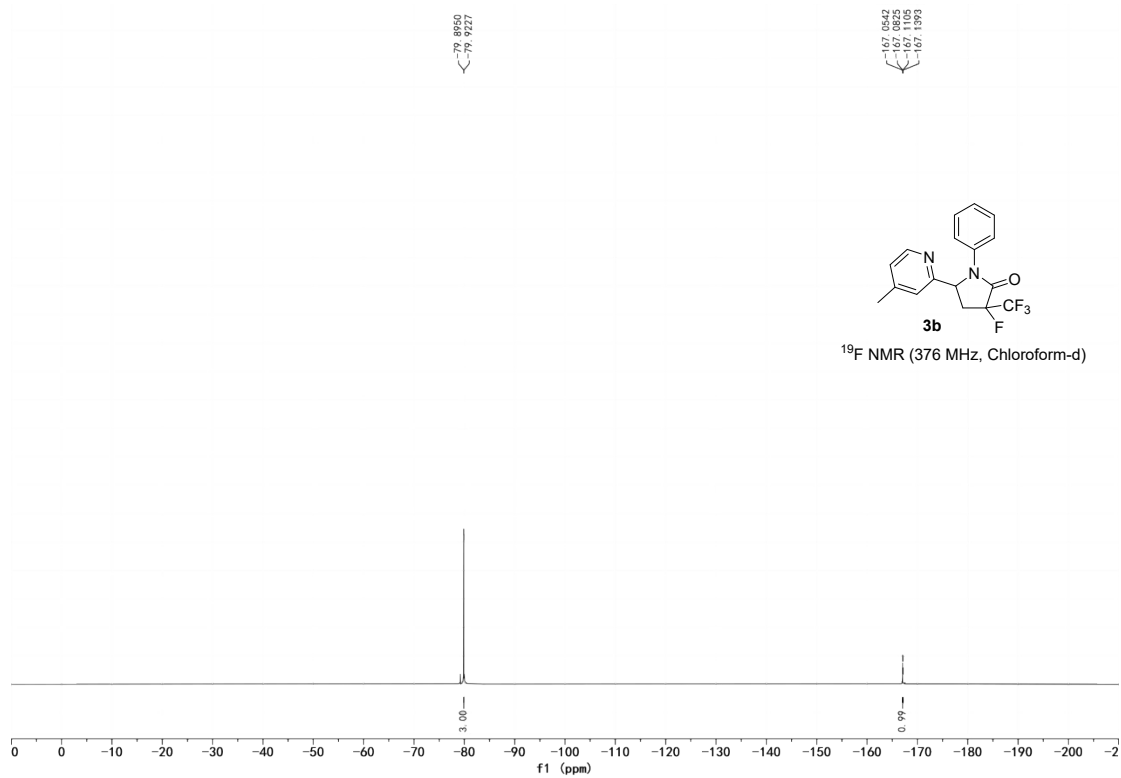

8.3928  
8.3868  
7.4551  
7.4316  
7.4163  
7.4132  
7.4039  
7.3884  
7.3819  
7.3632  
7.2633  
7.1693  
7.1463  
7.1506  
7.0428  
5.3818  
5.3726  
5.3627  
5.3530  
5.3484  
5.3386

3.2597  
3.2201  
3.2025  
3.1854  
3.1470  
3.7303  
2.7162  
2.7131  
2.6988  
2.6786  
2.6654  
2.6534  
2.6389  
2.6185  
2.6145  
2.6114  
2.2833

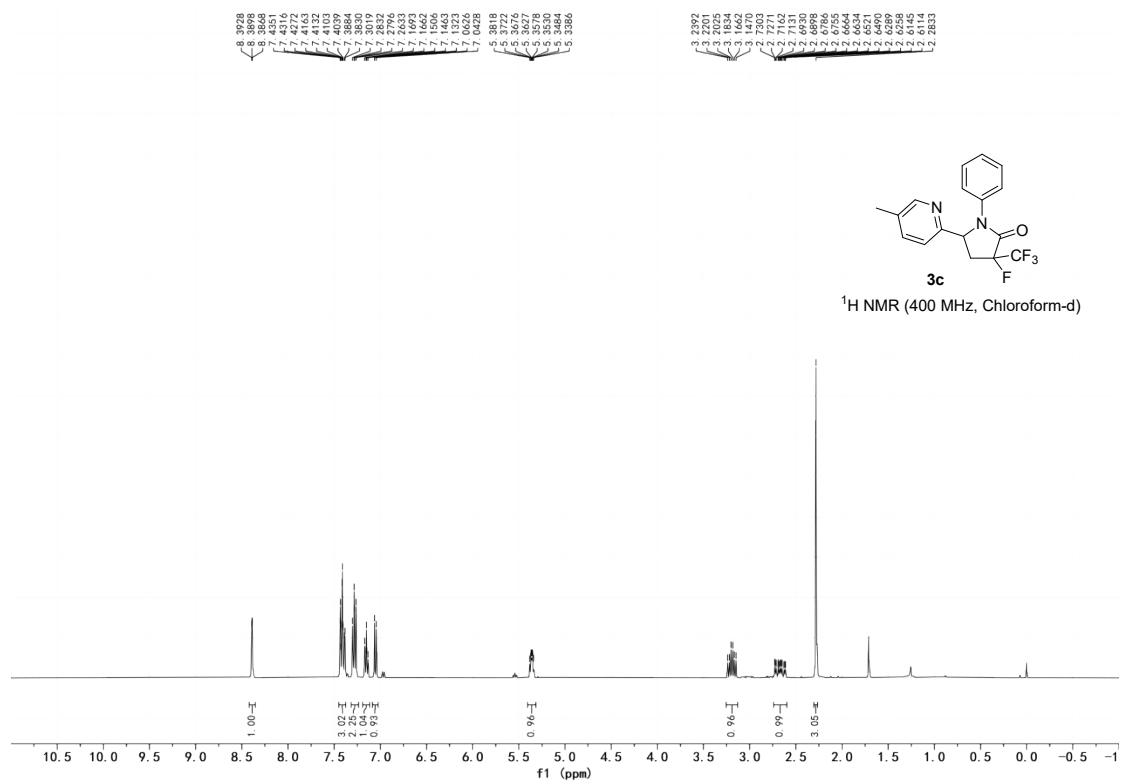

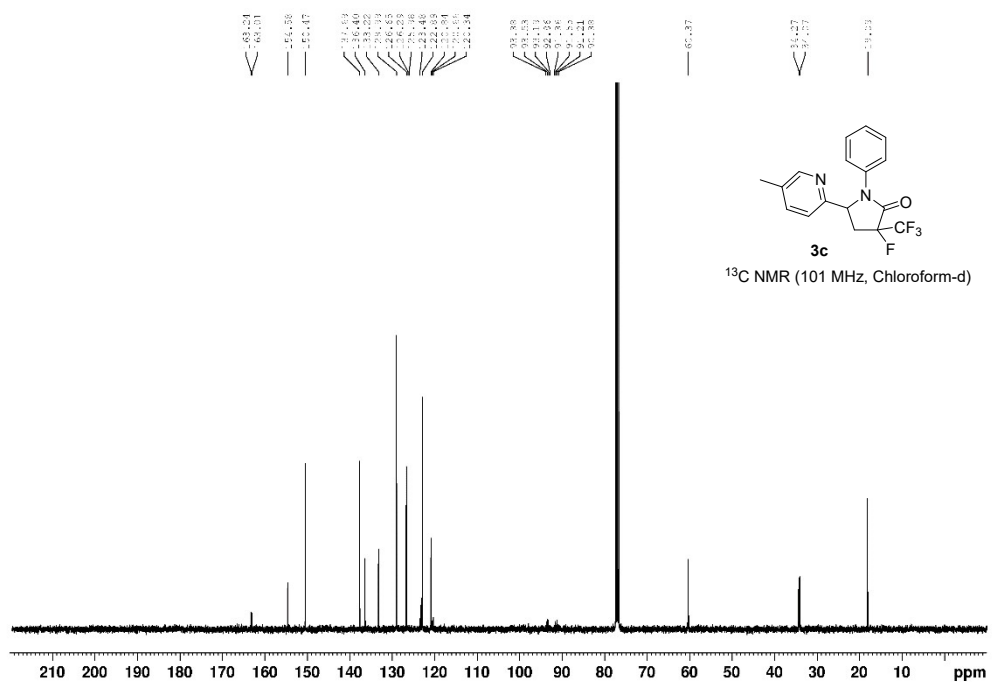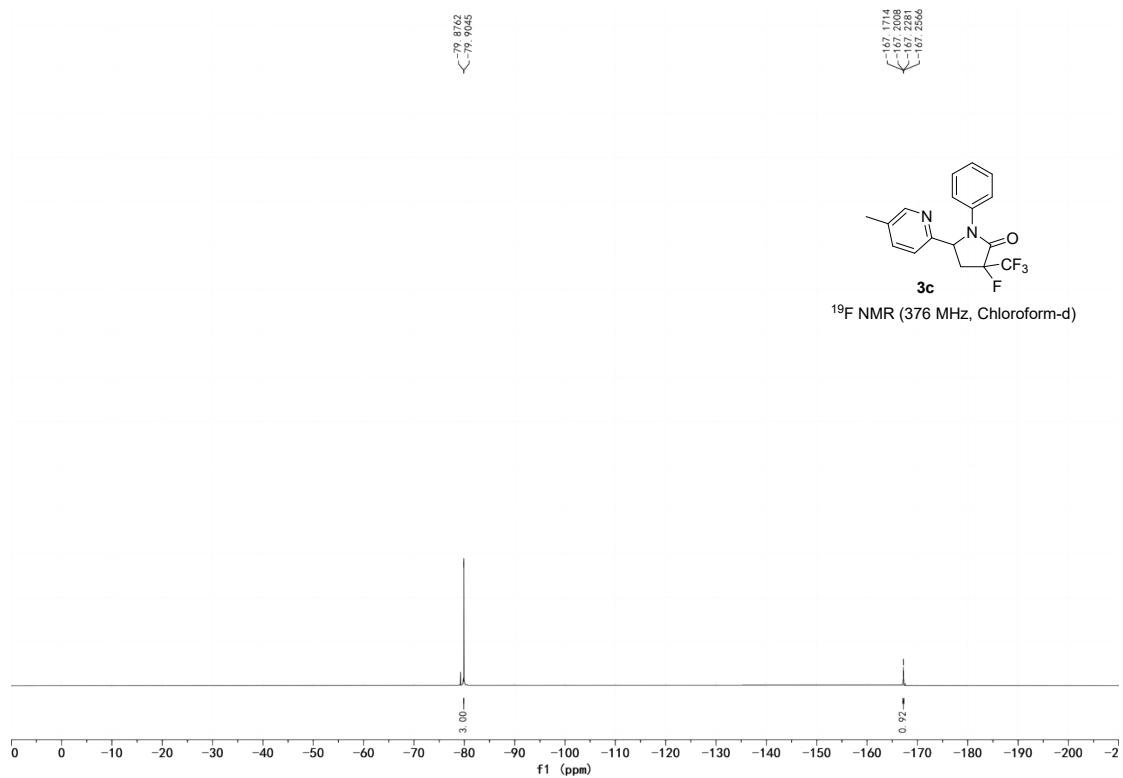



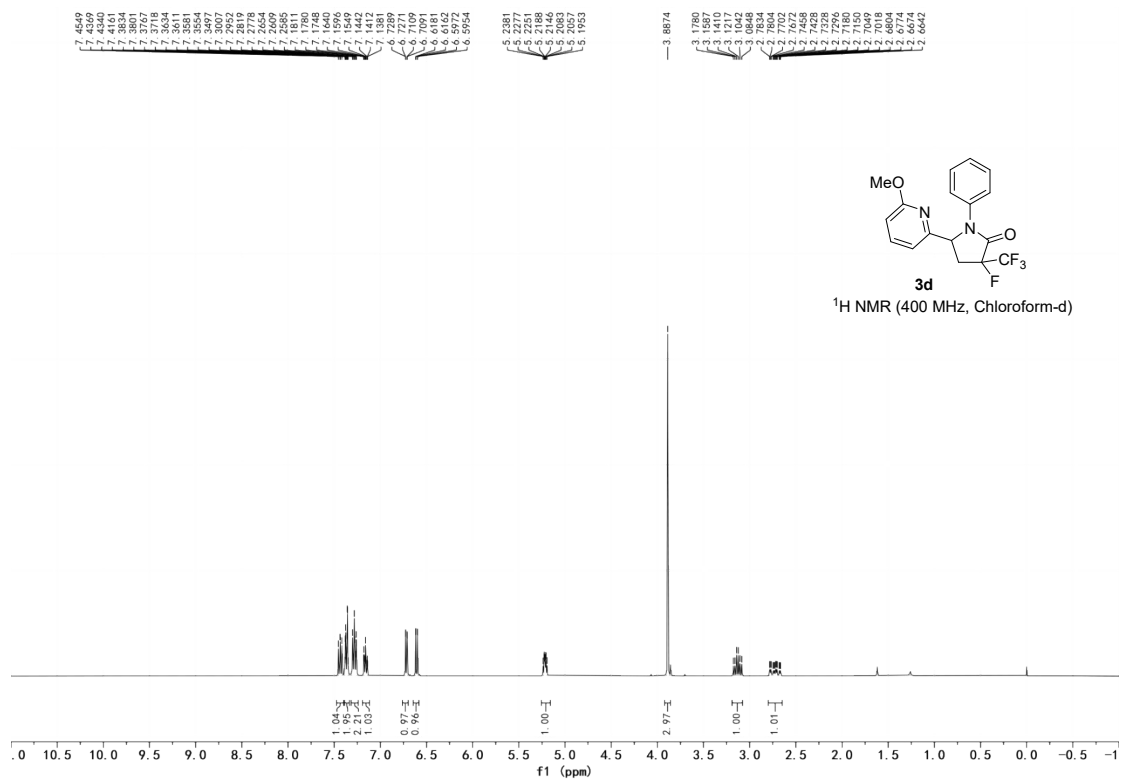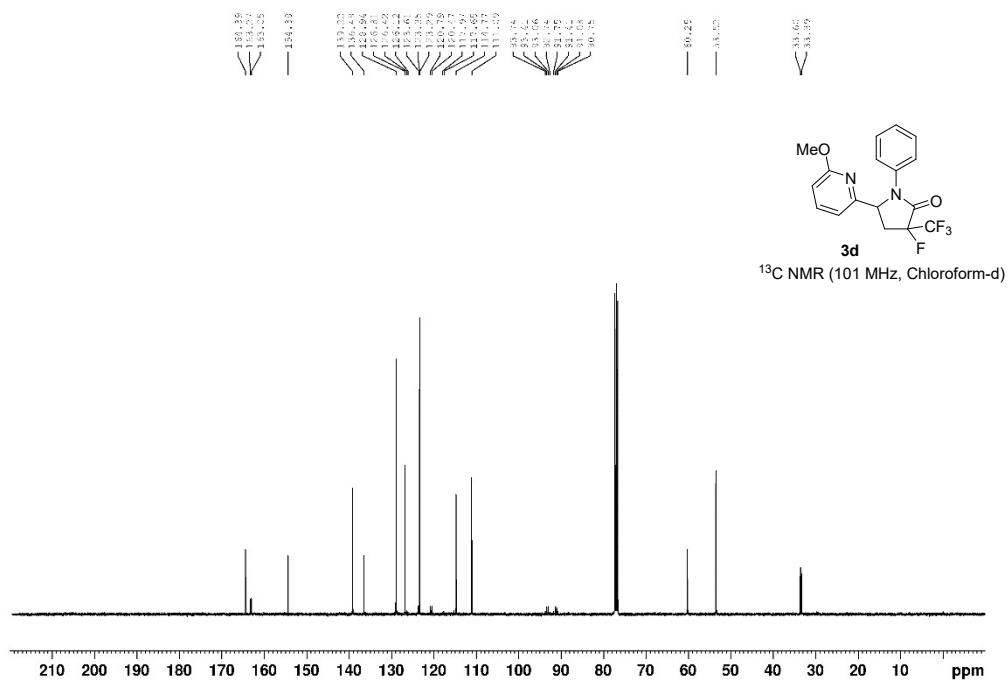

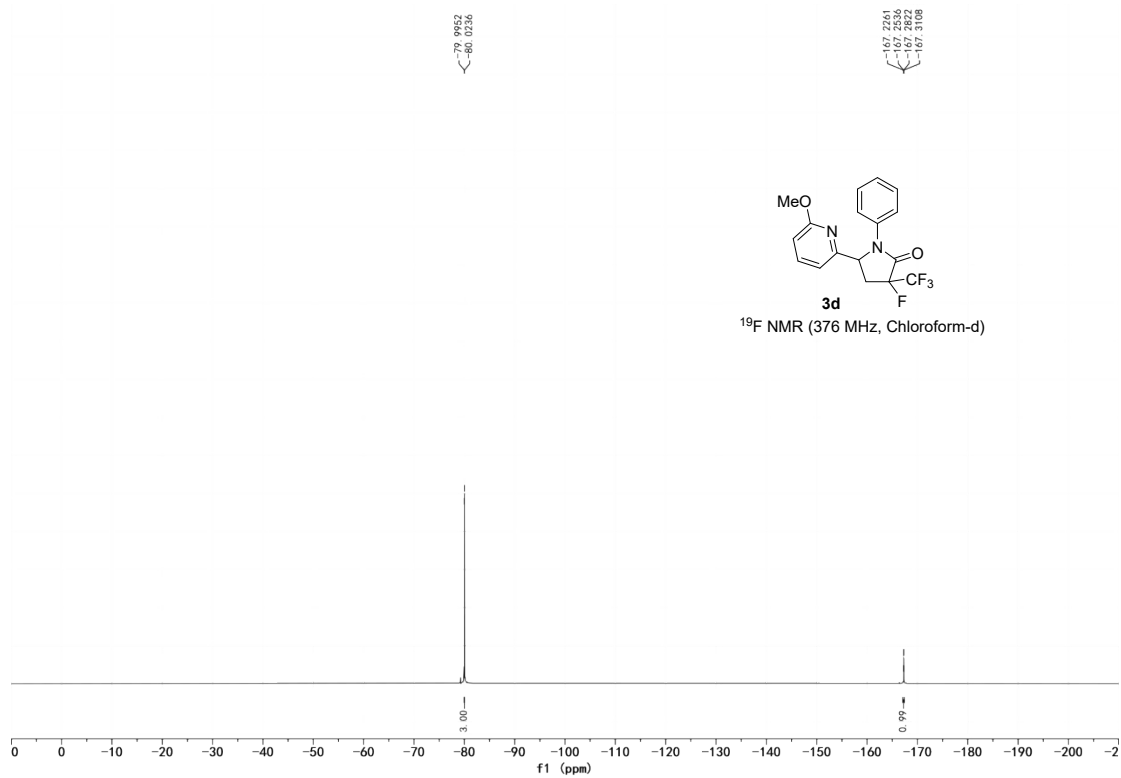



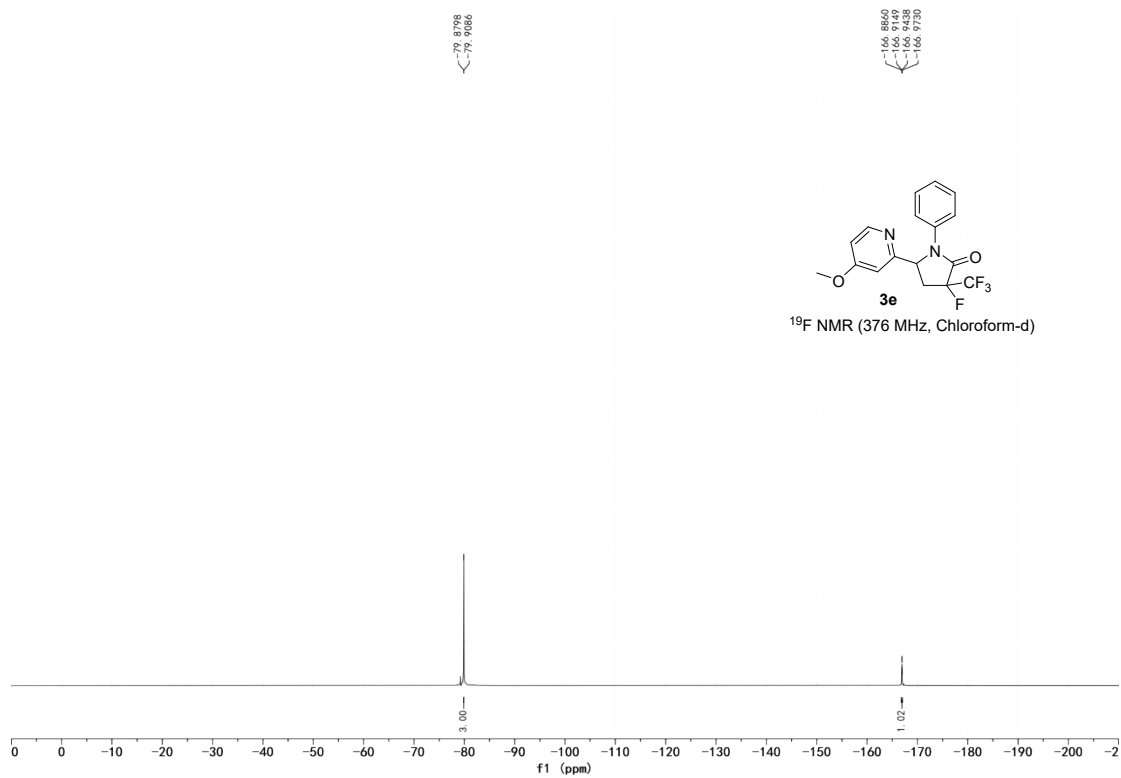

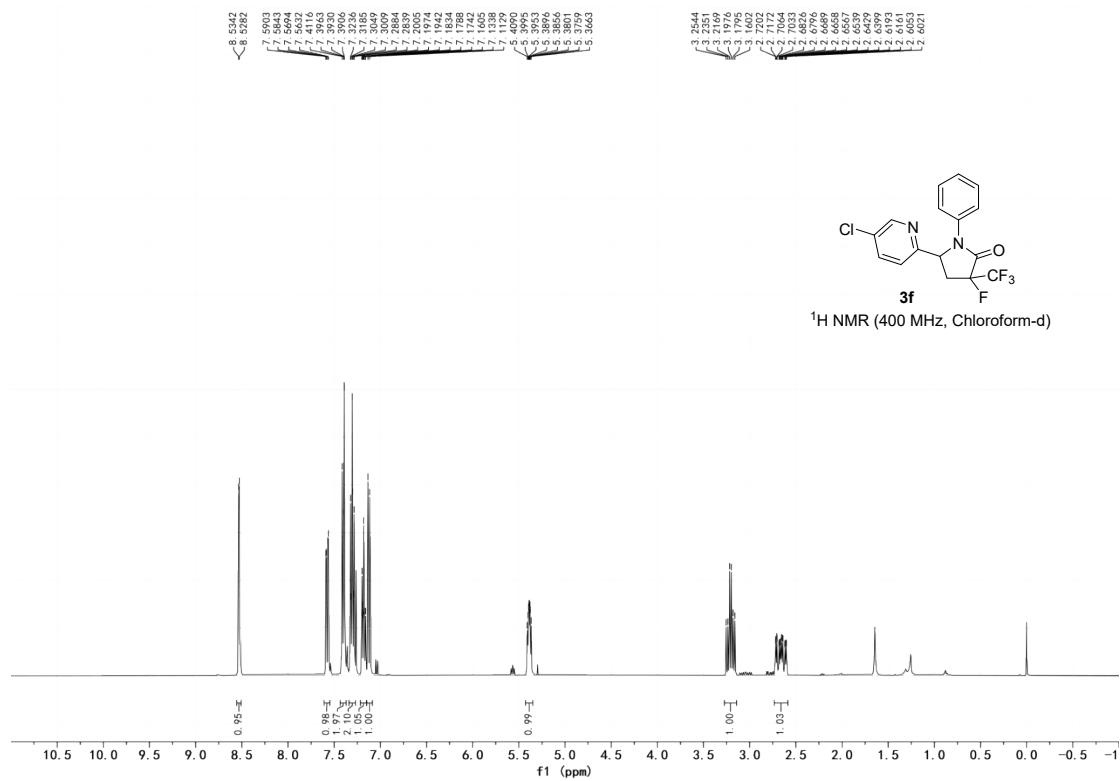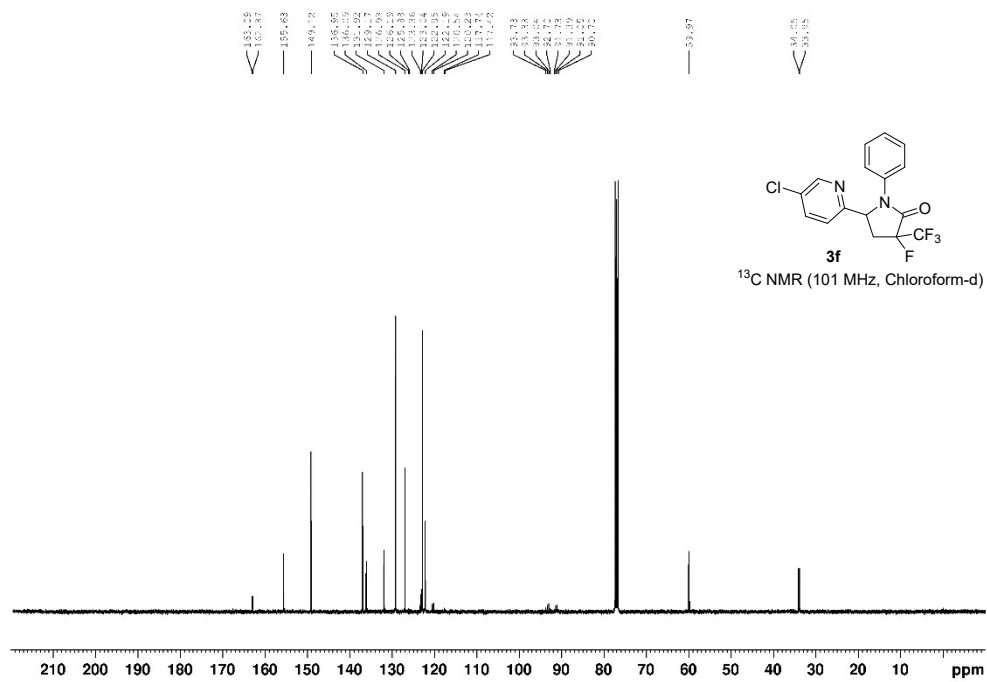

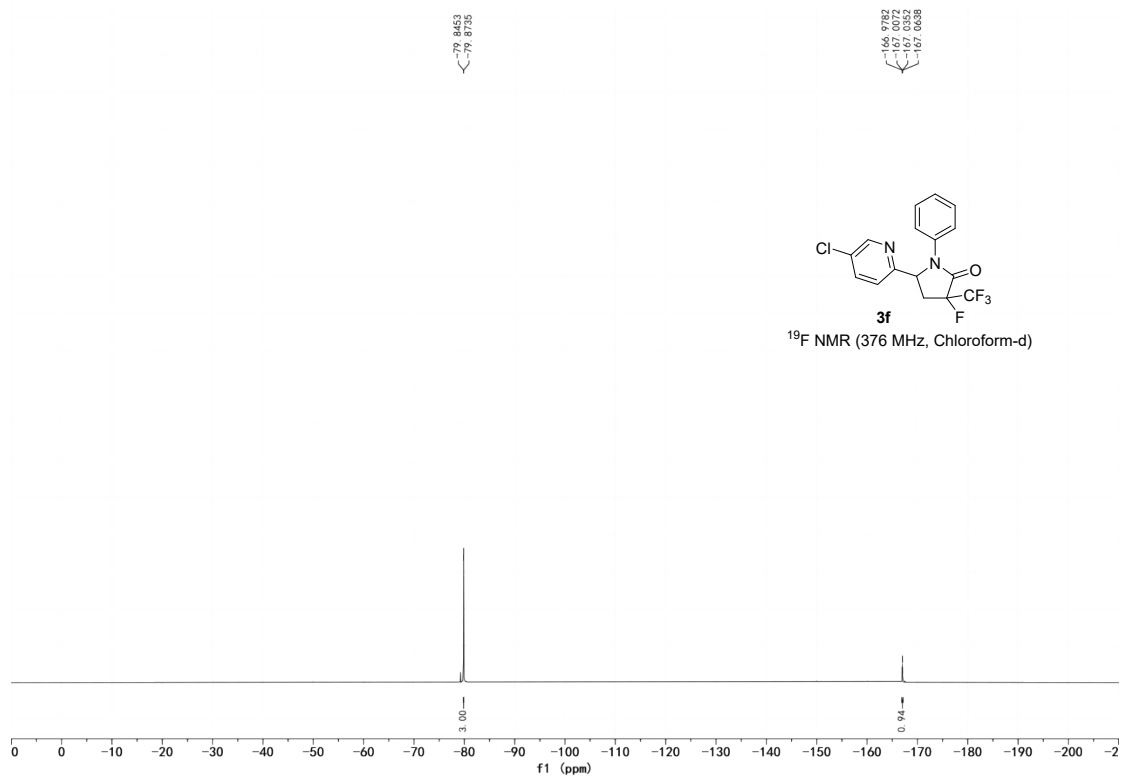



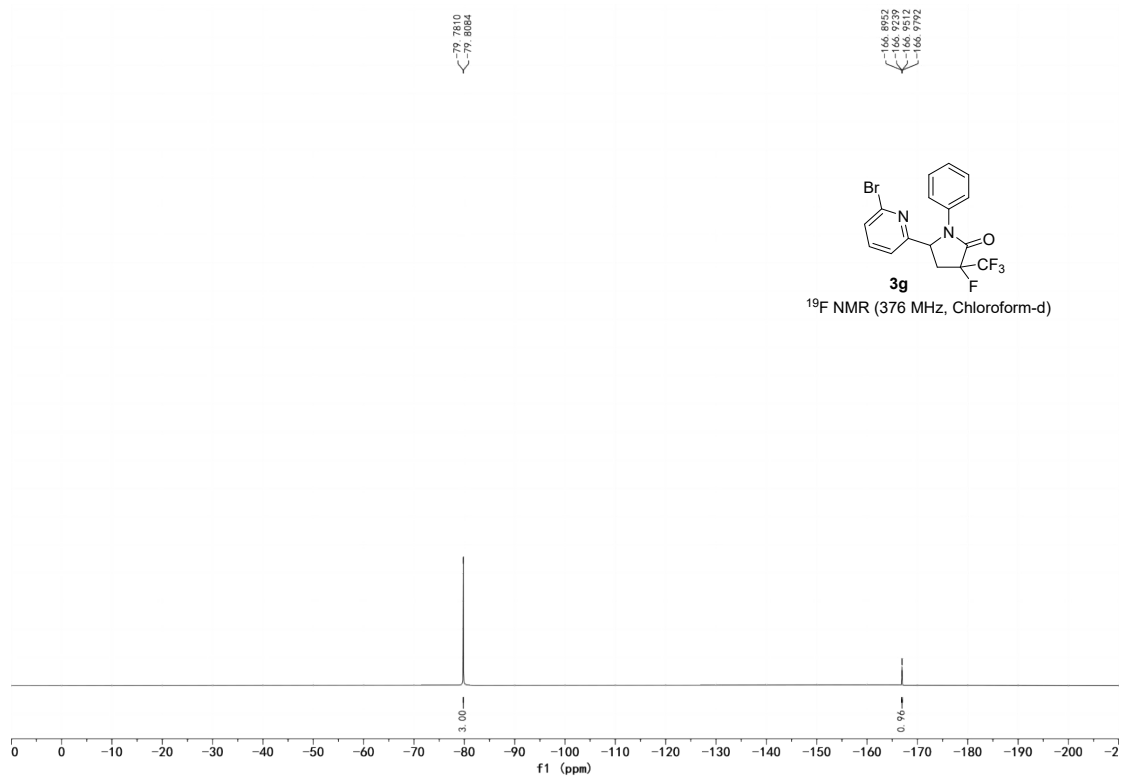



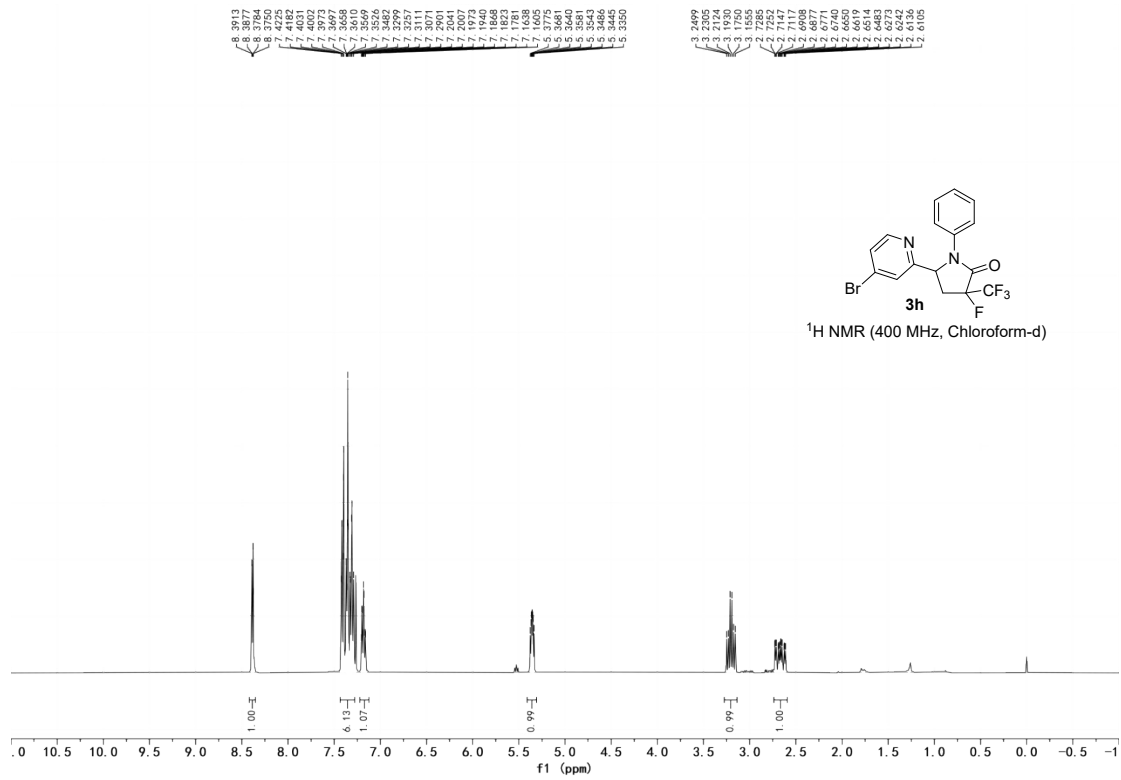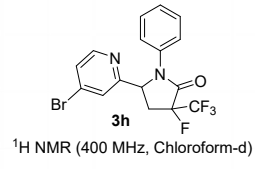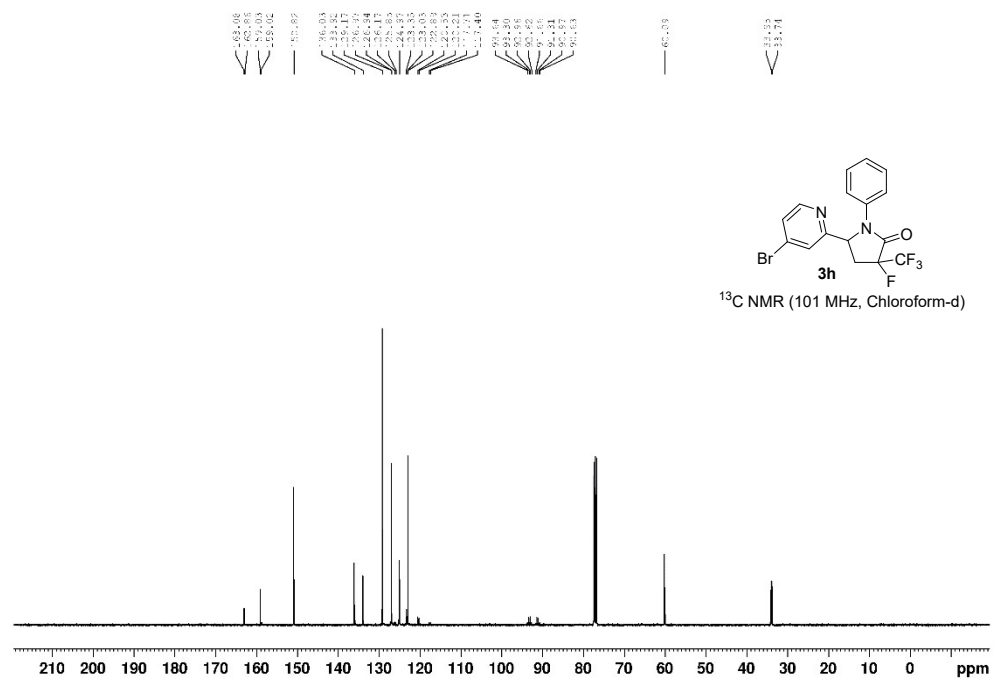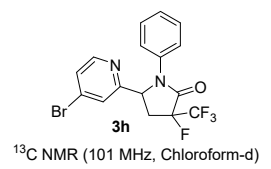

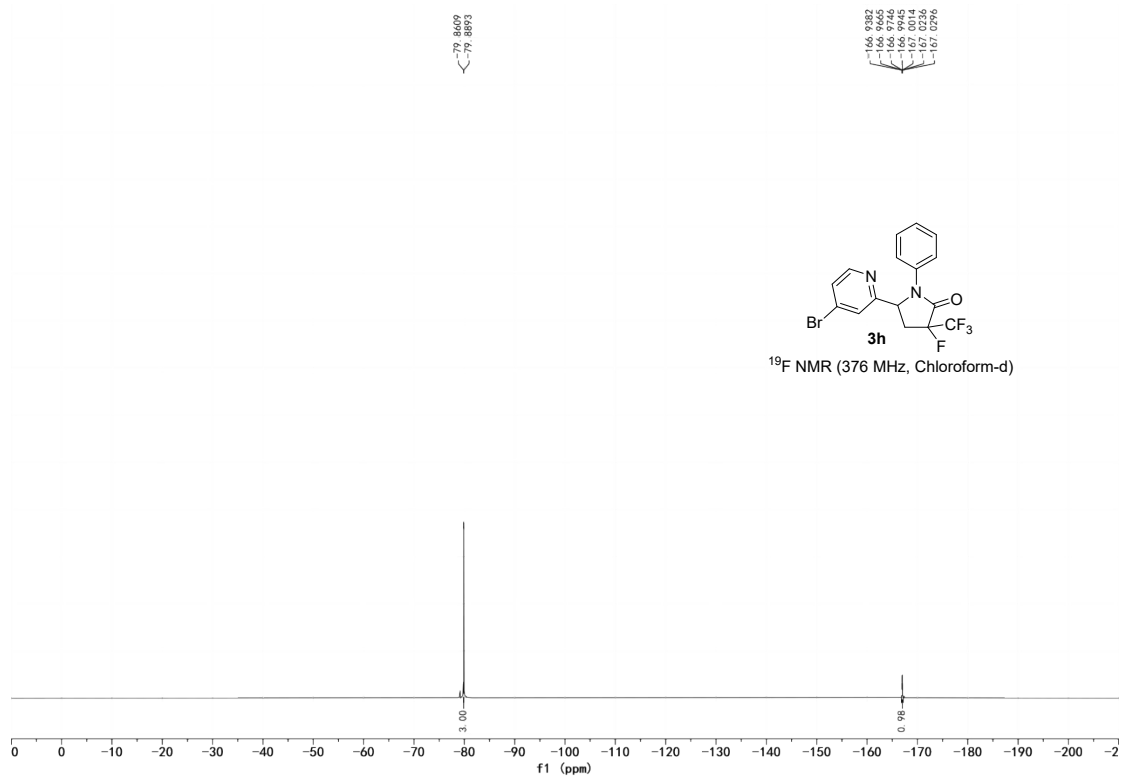

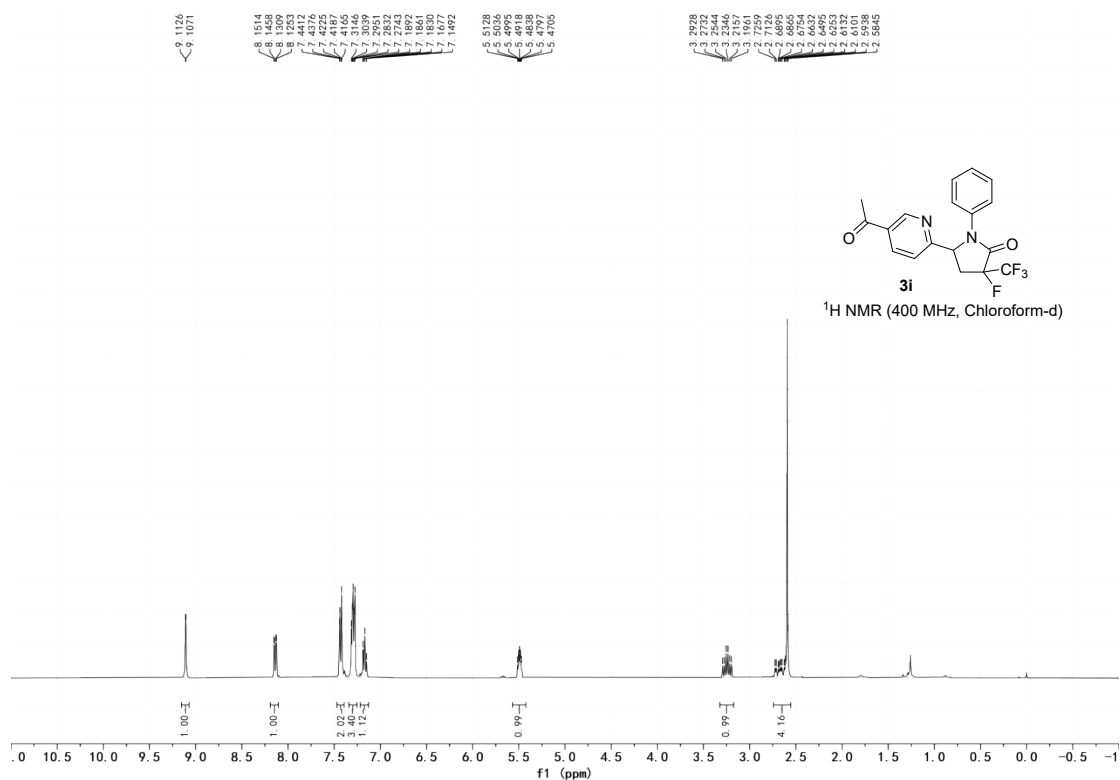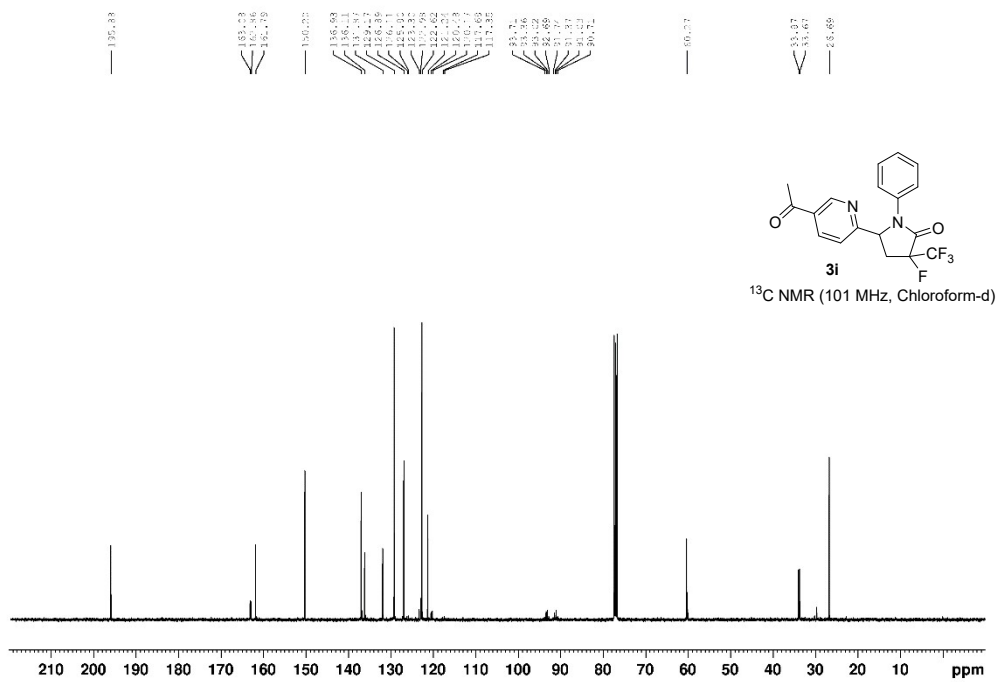

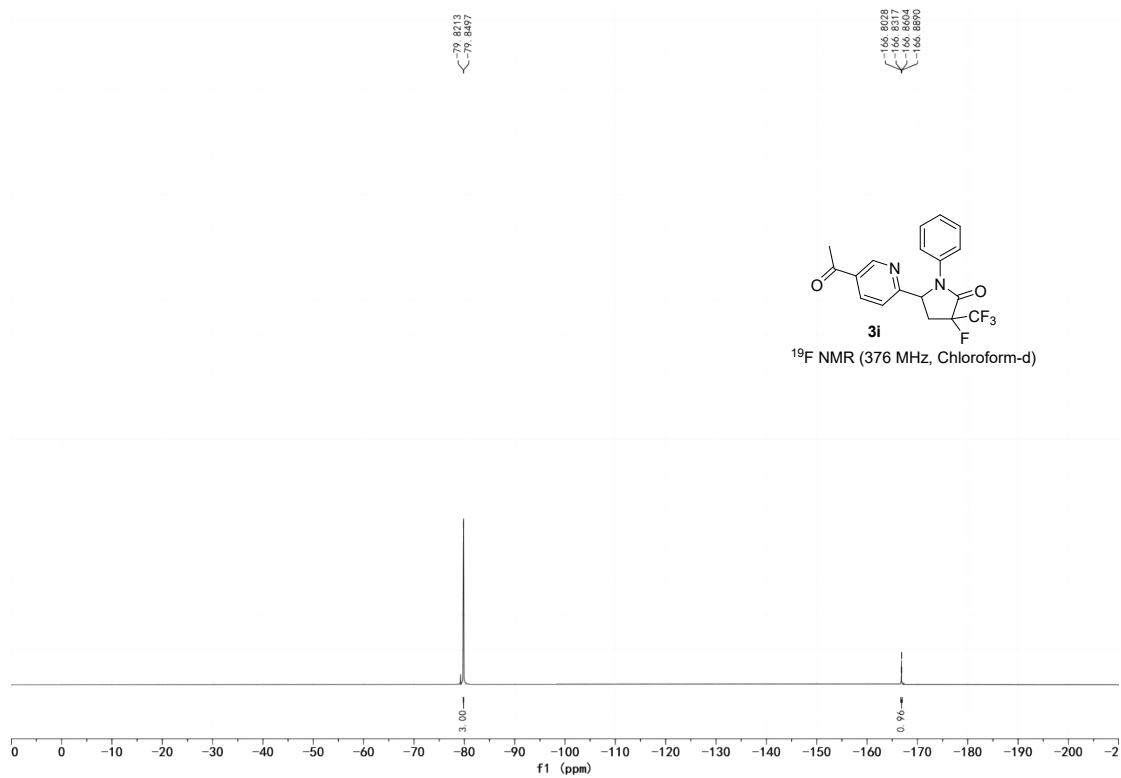

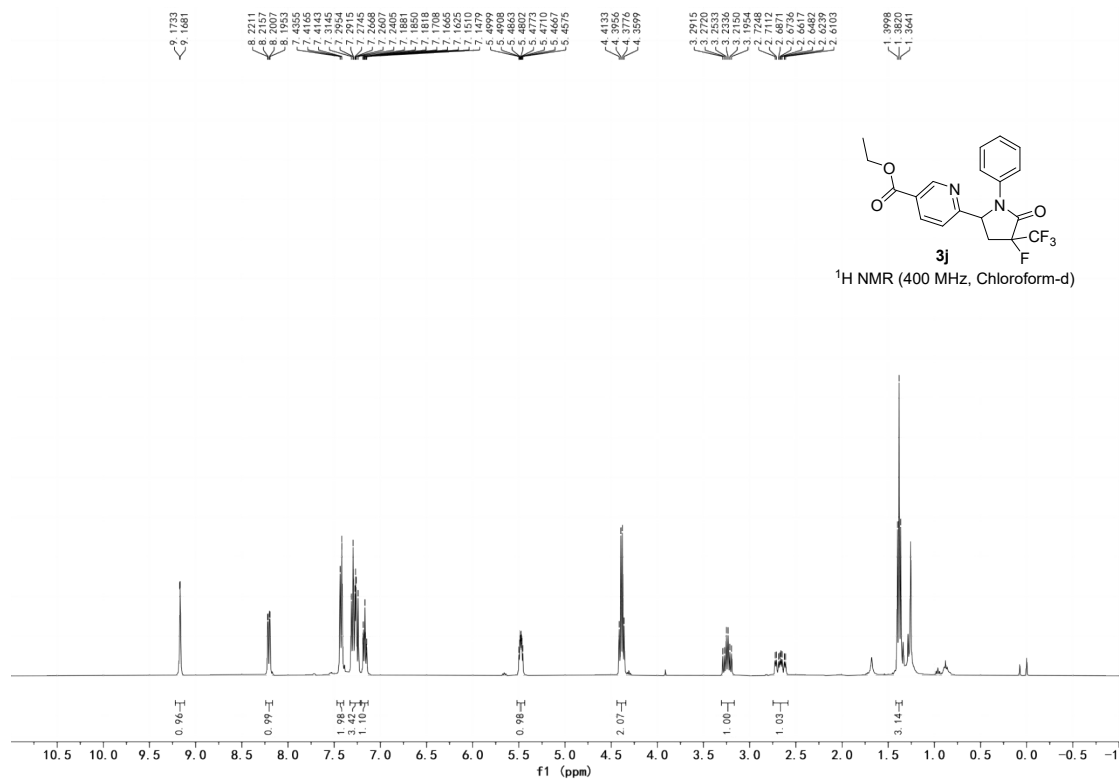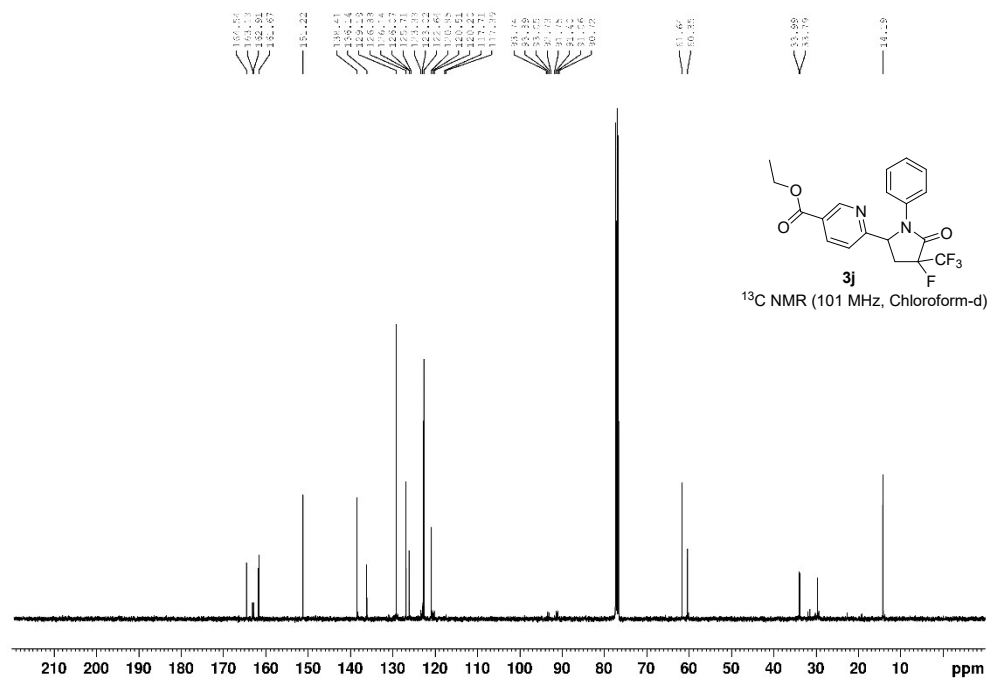

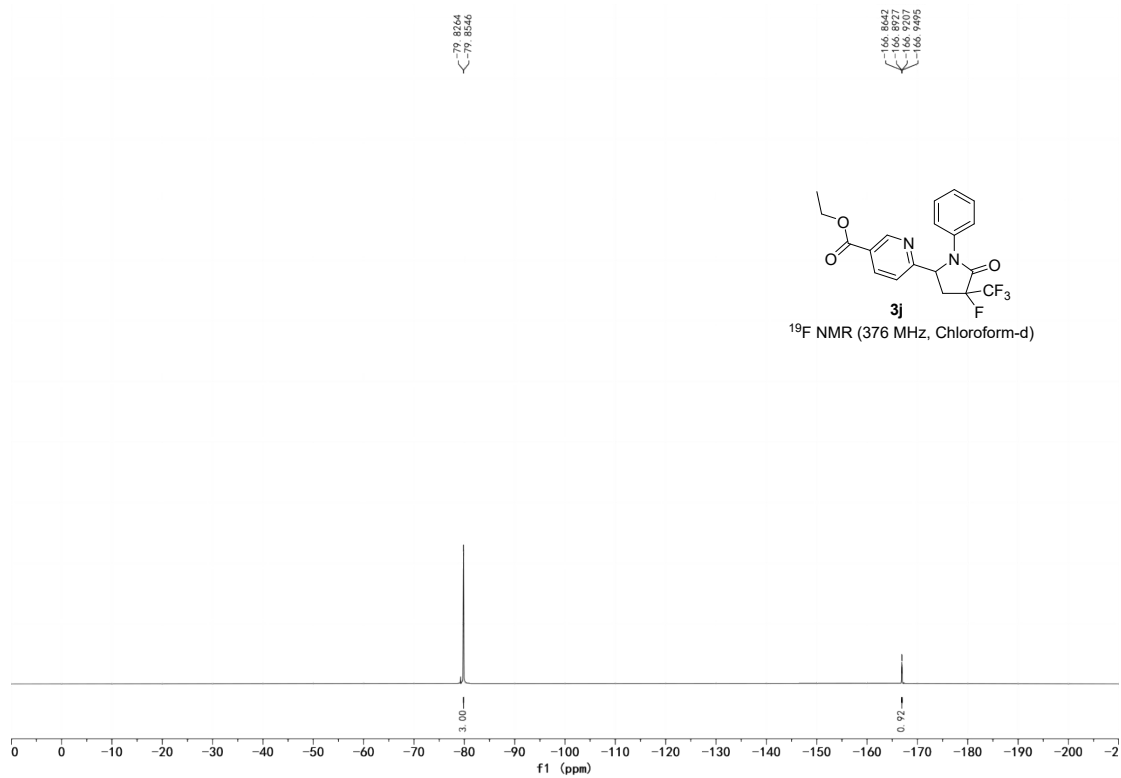



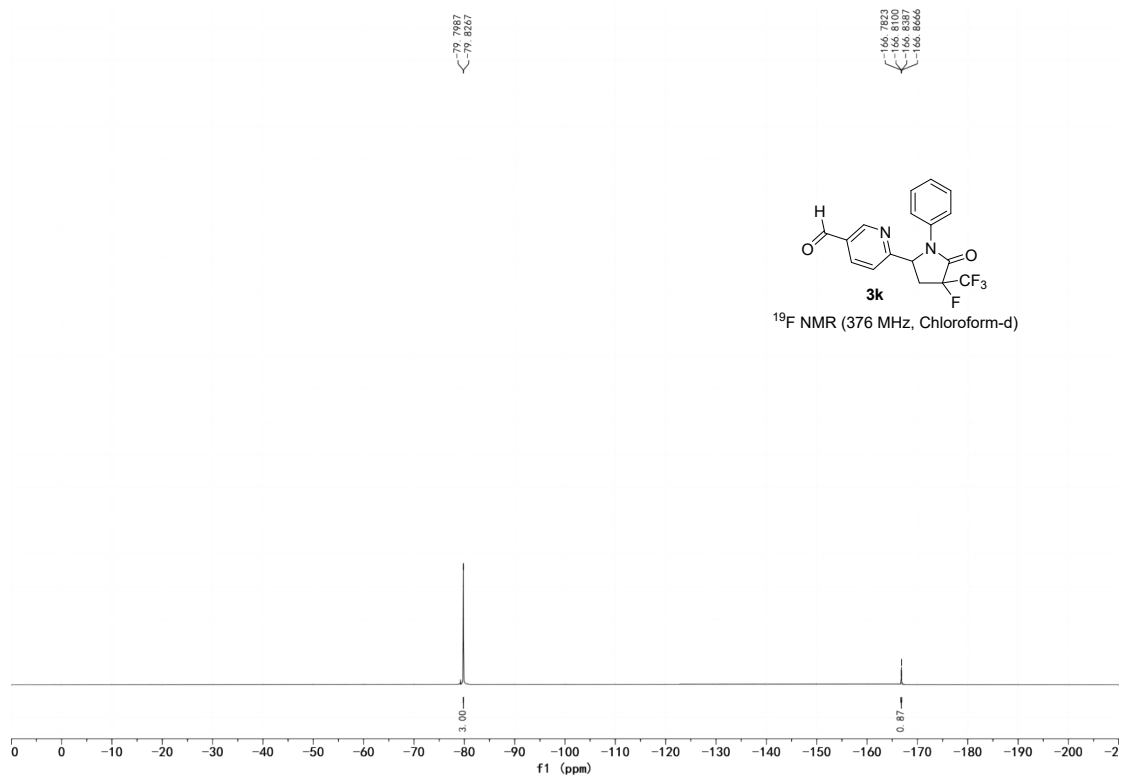



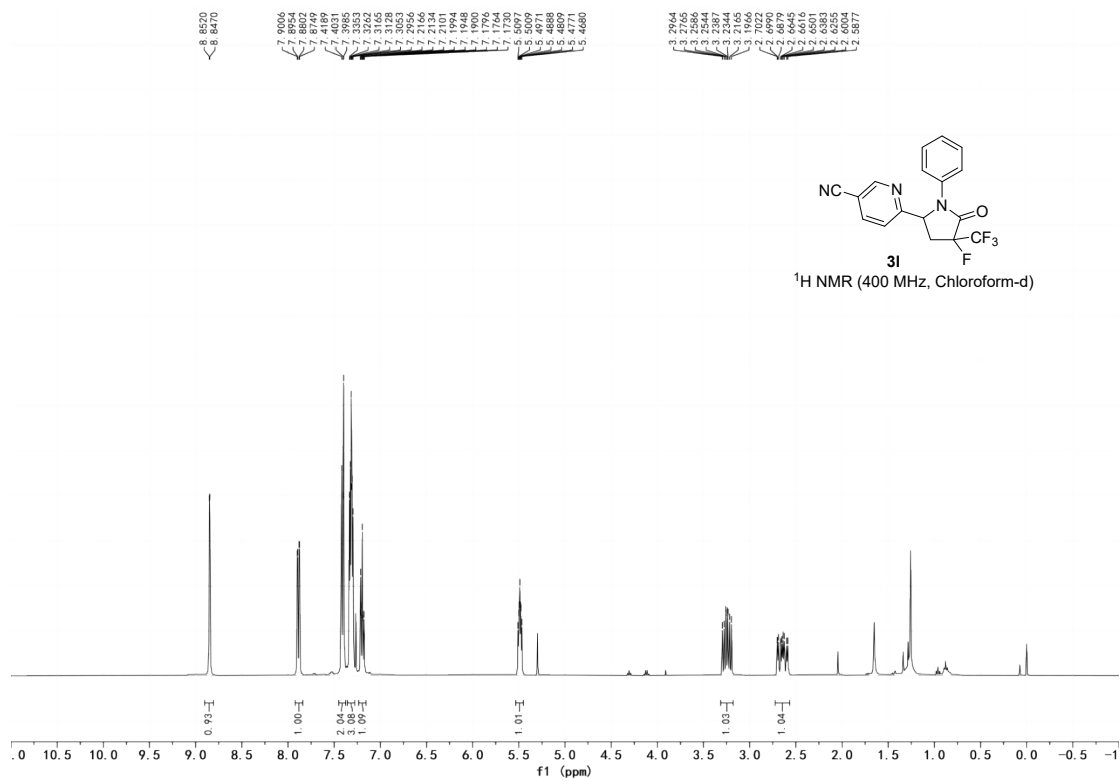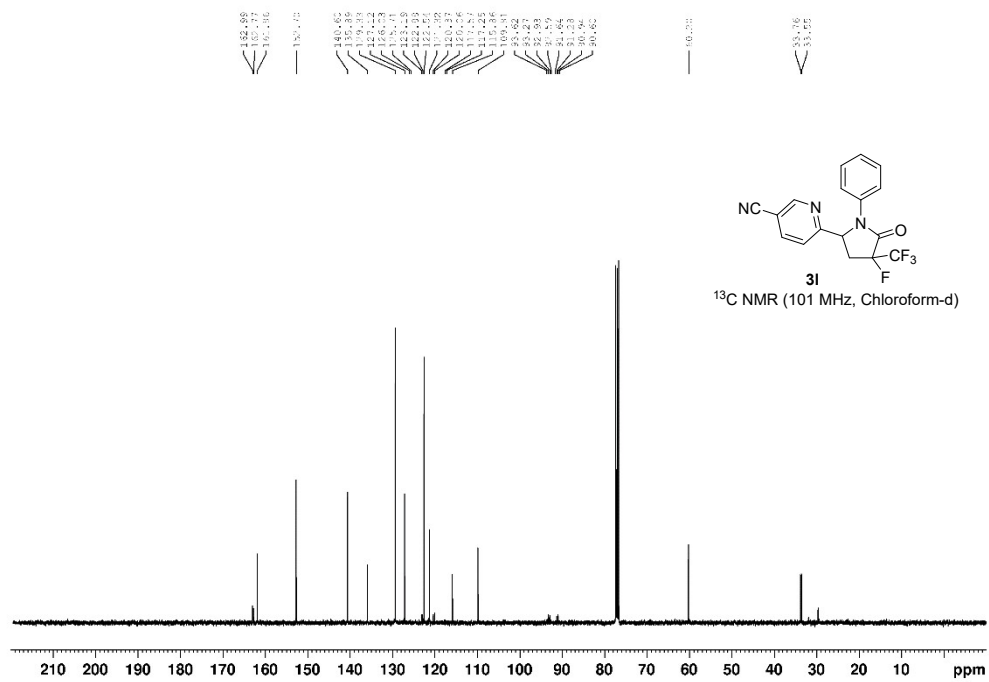

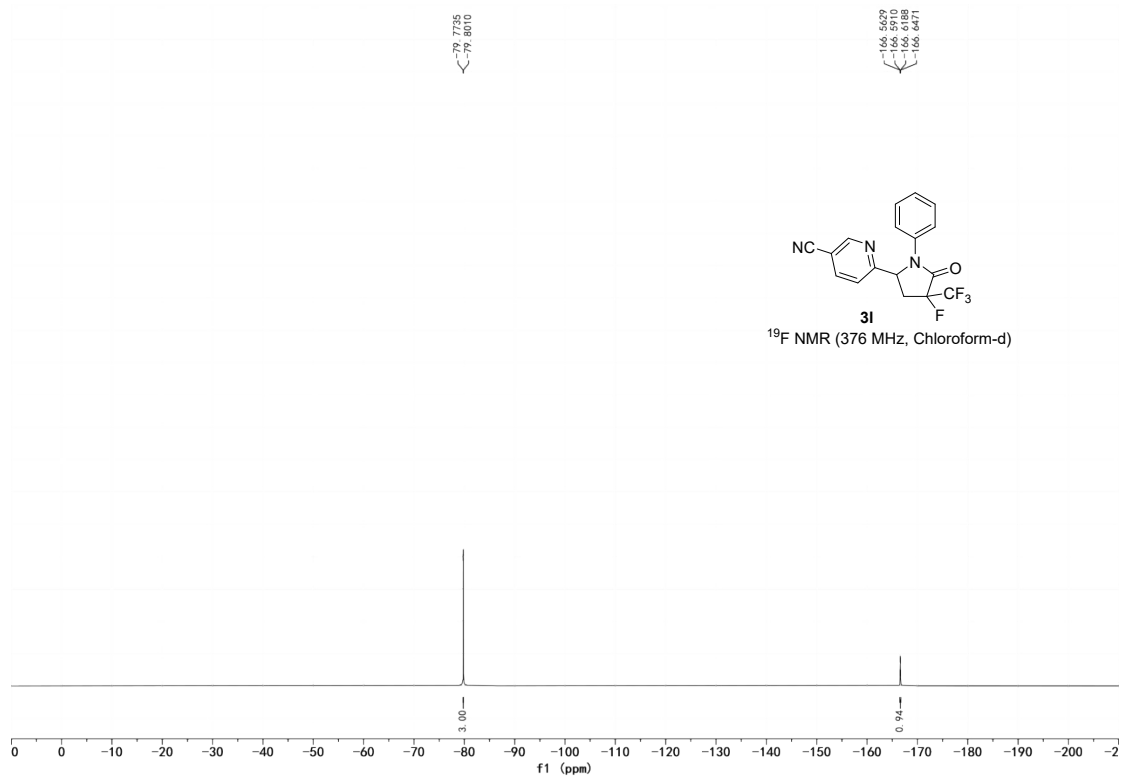



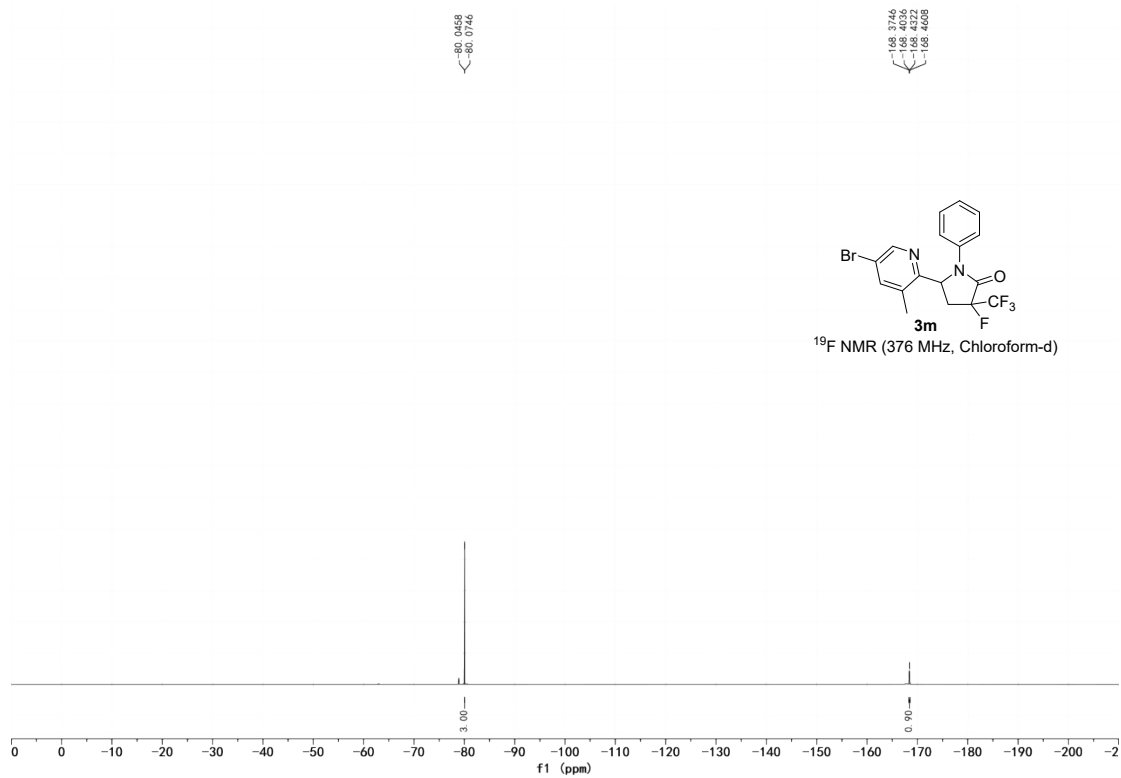

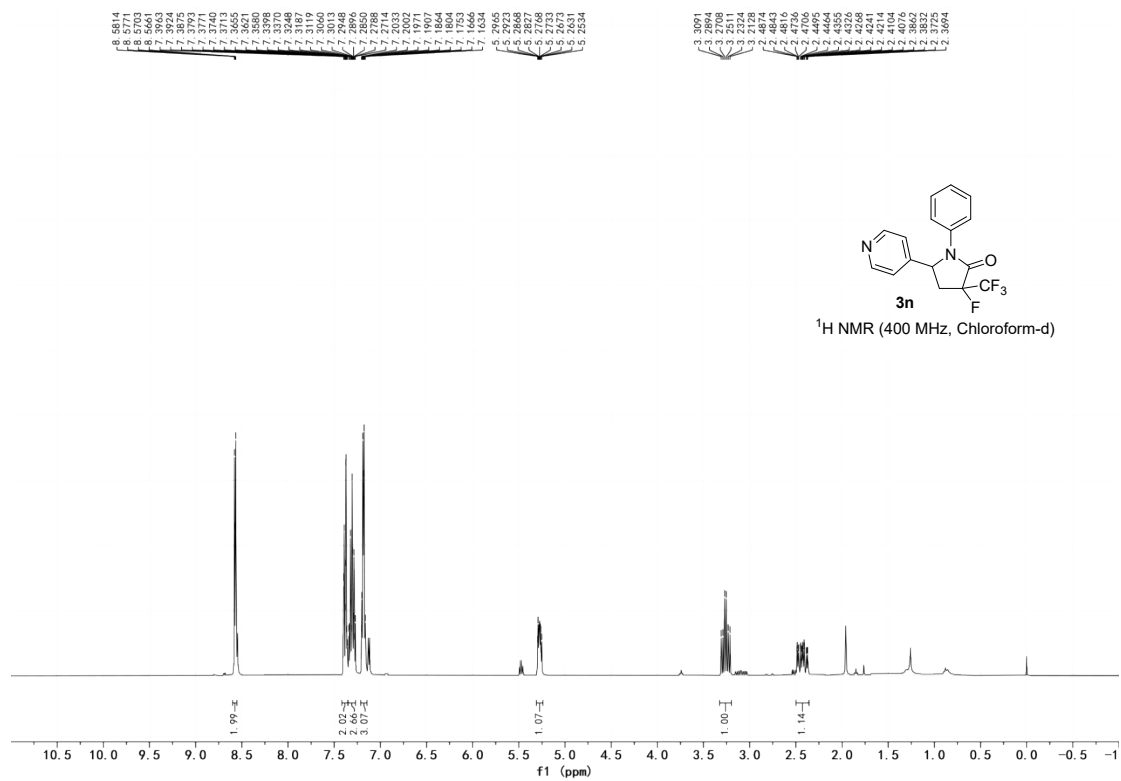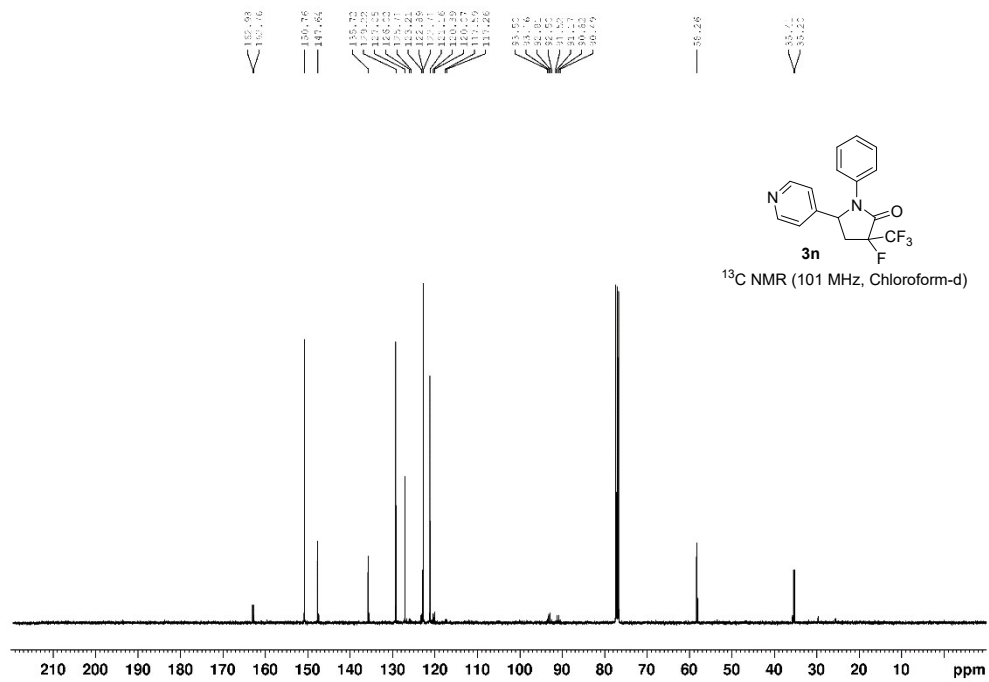

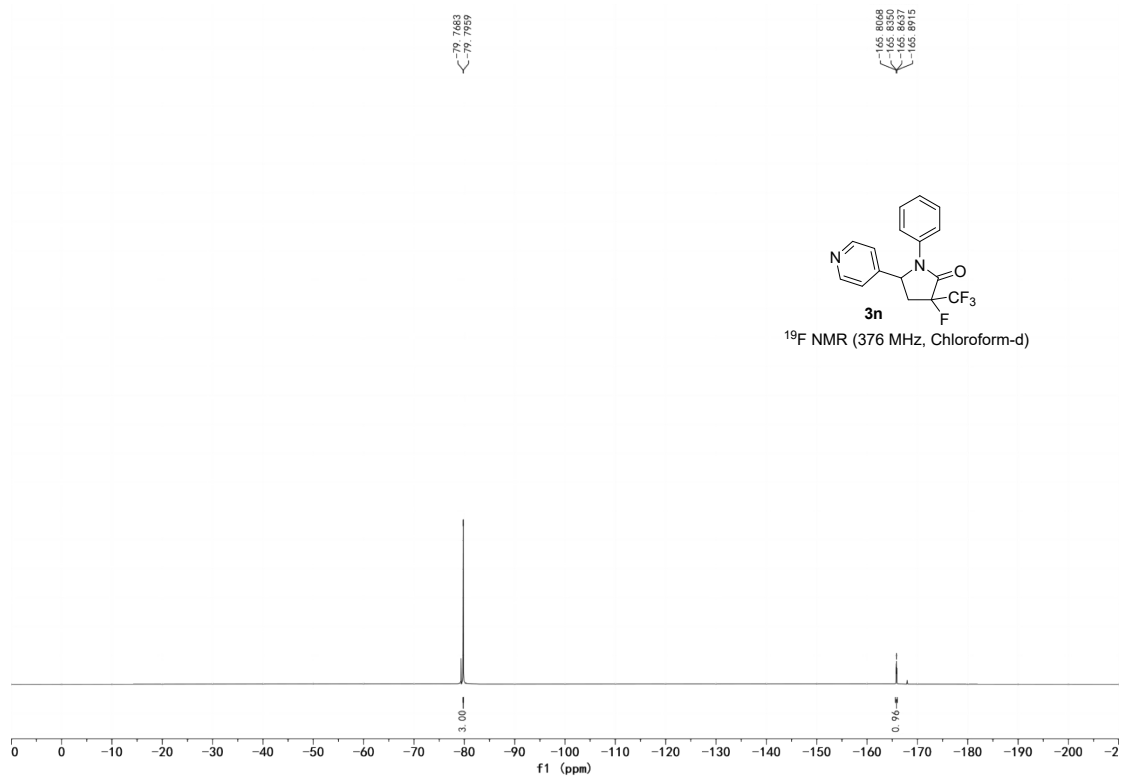

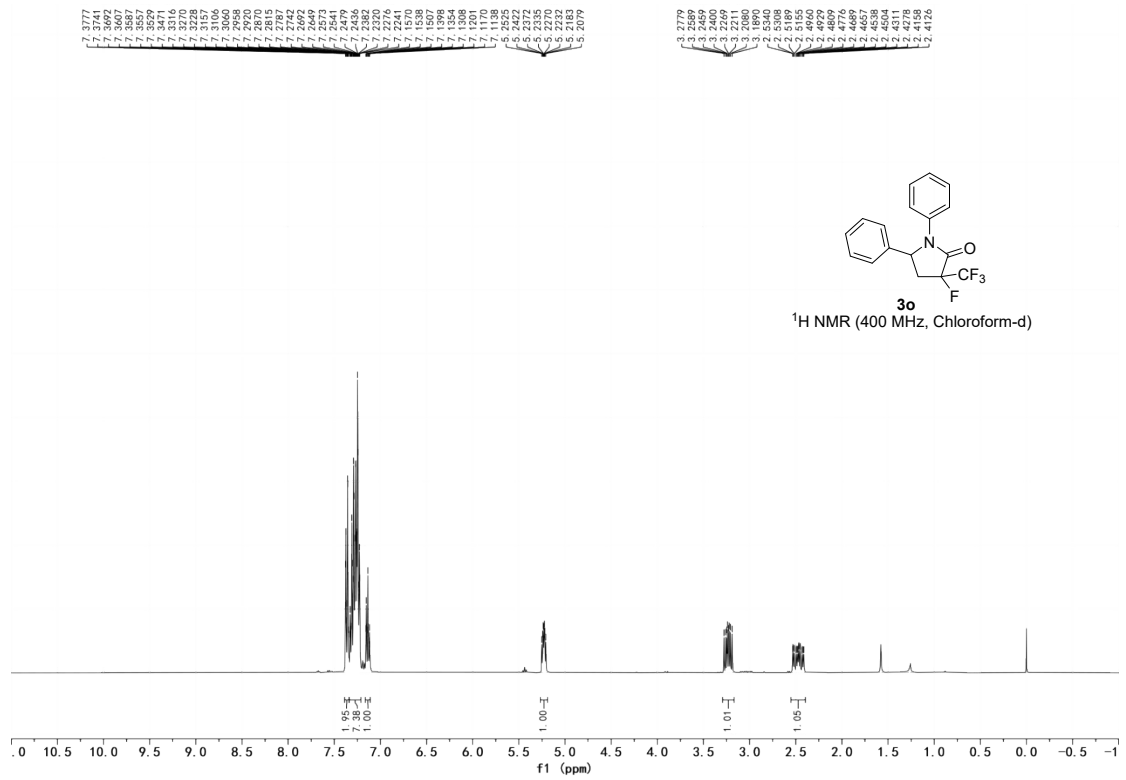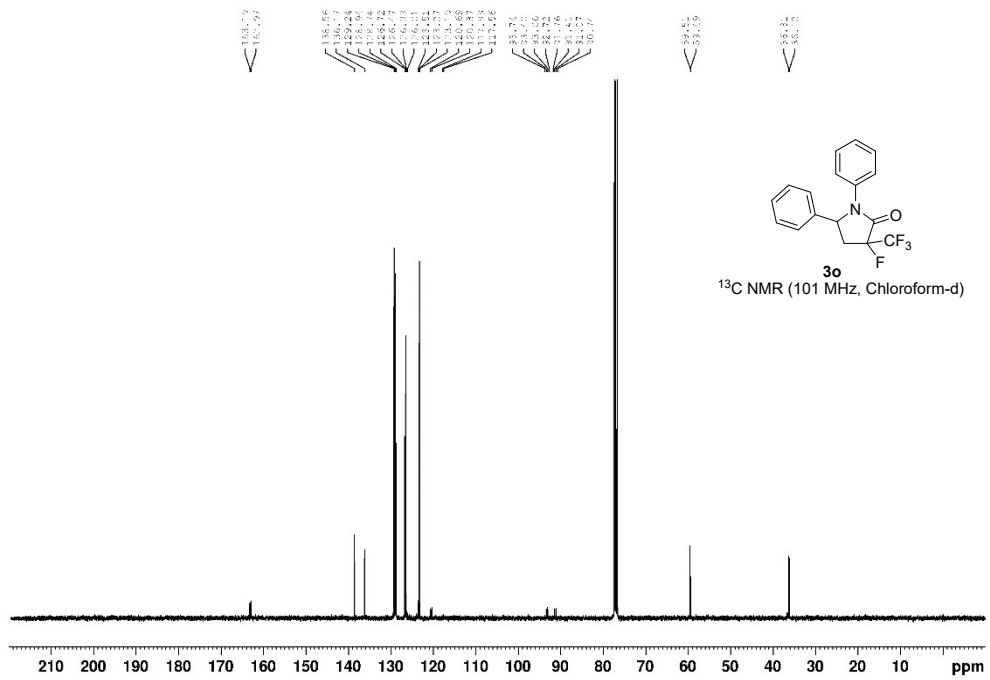

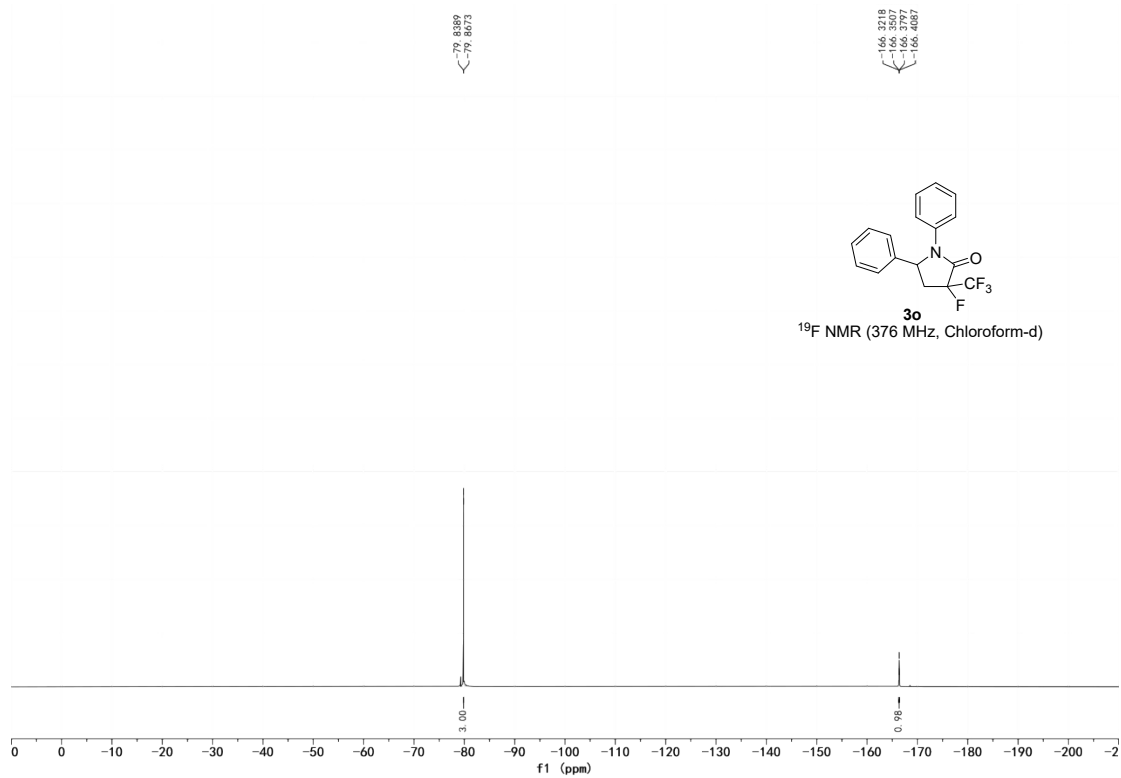



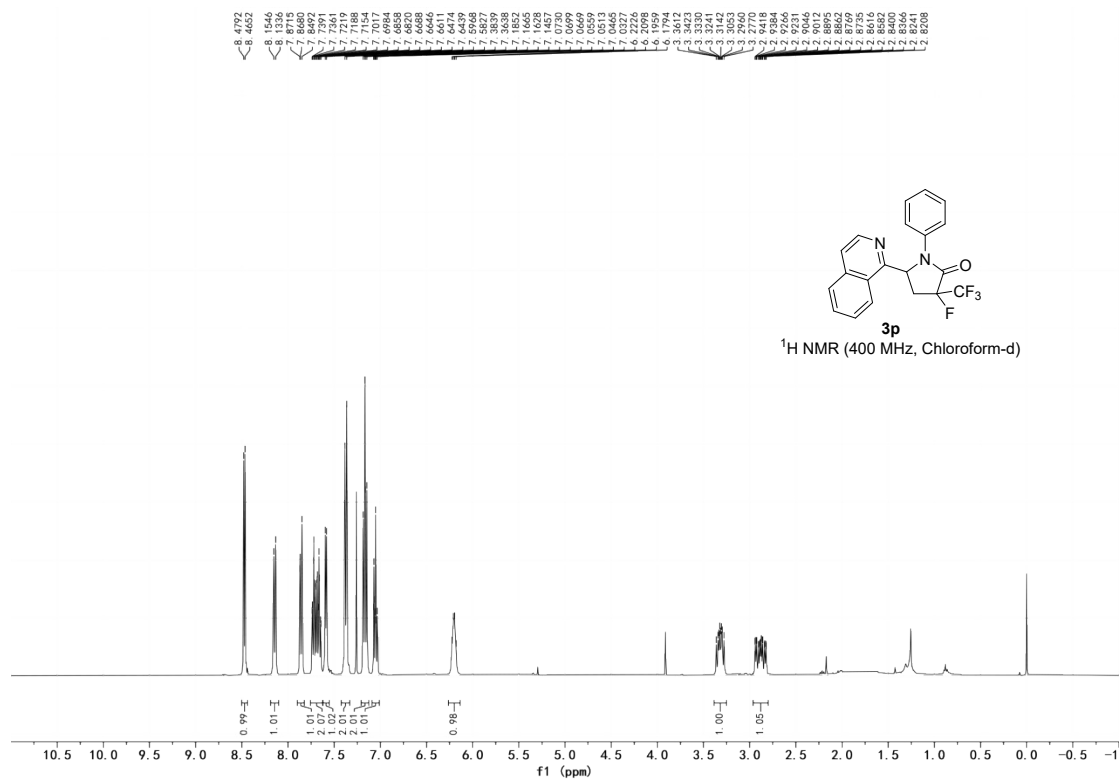

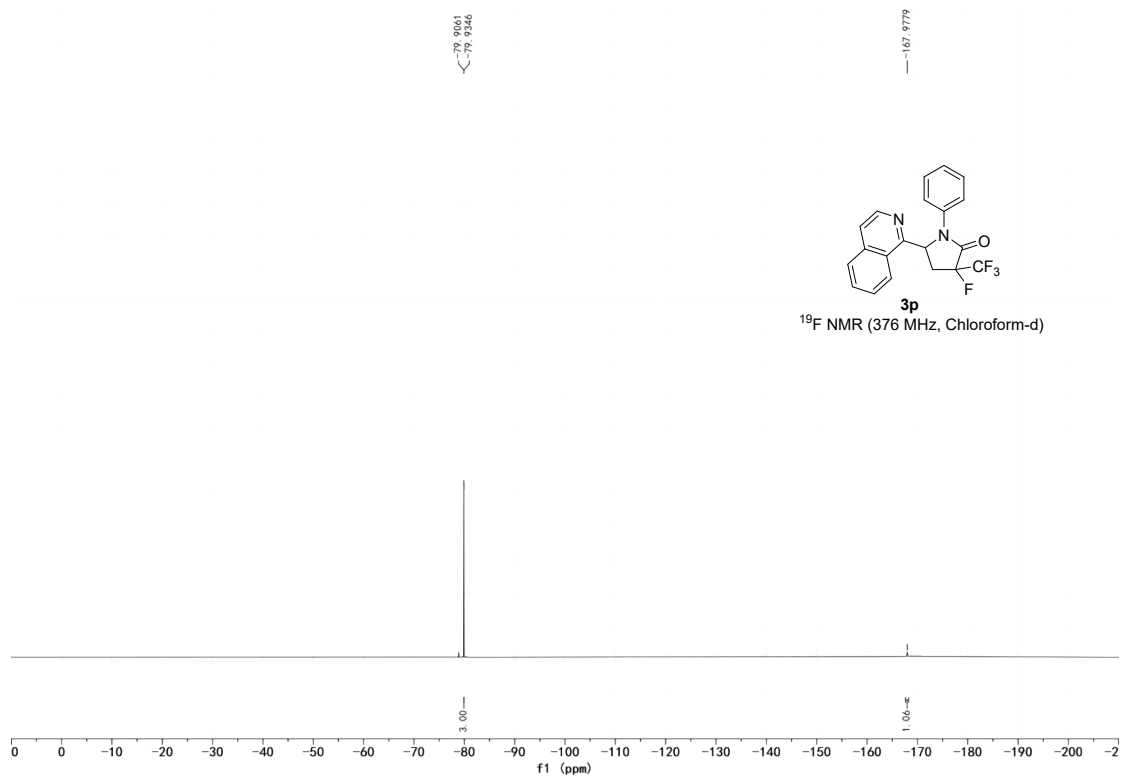



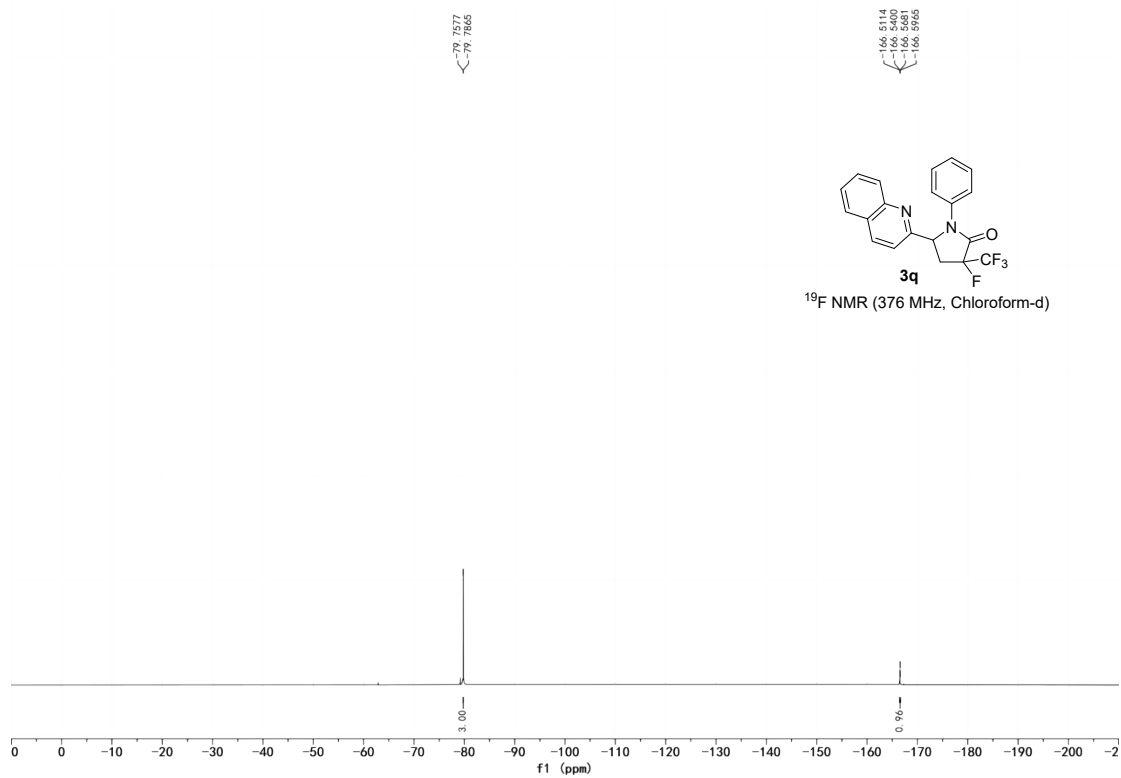

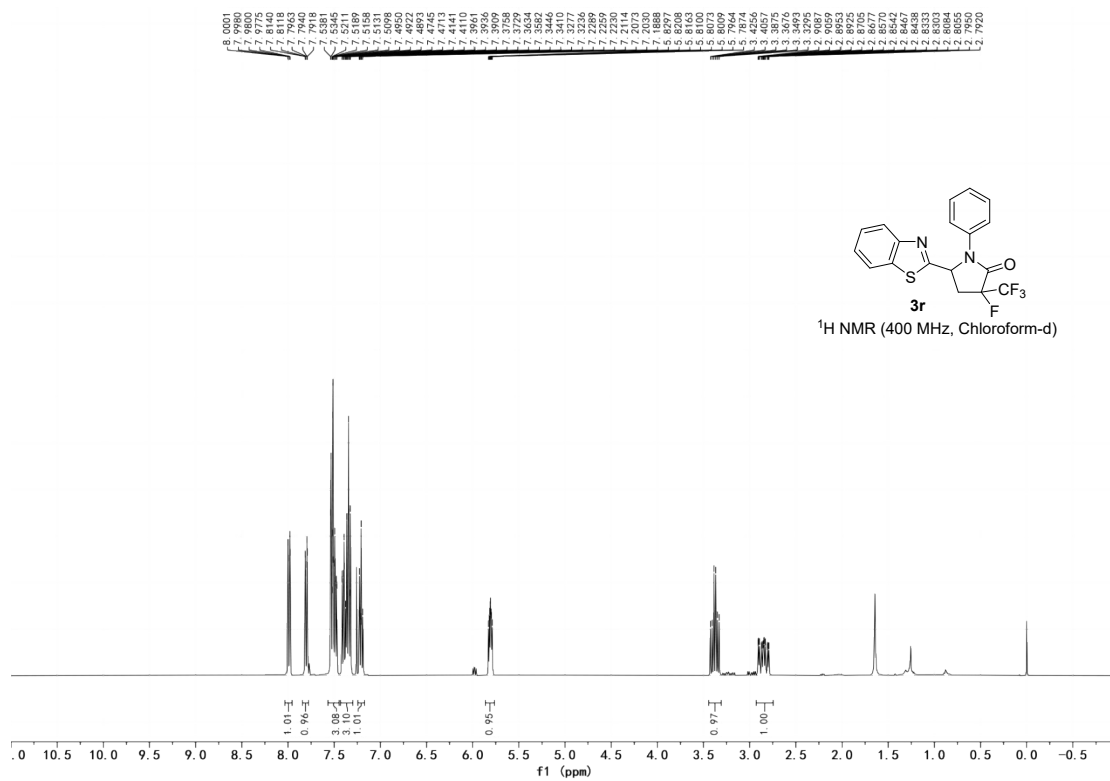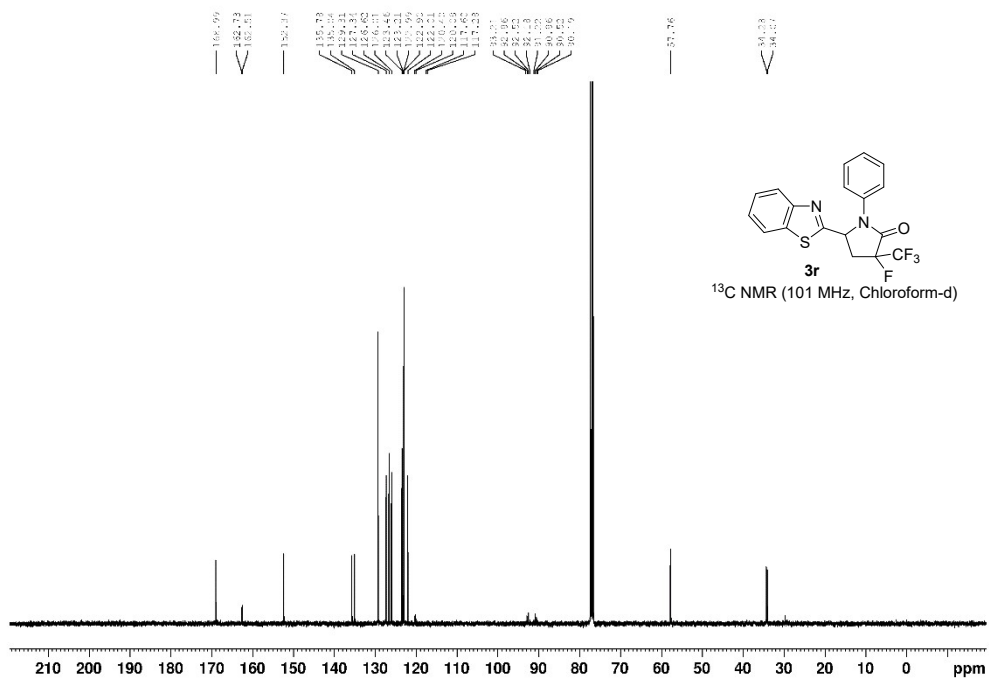

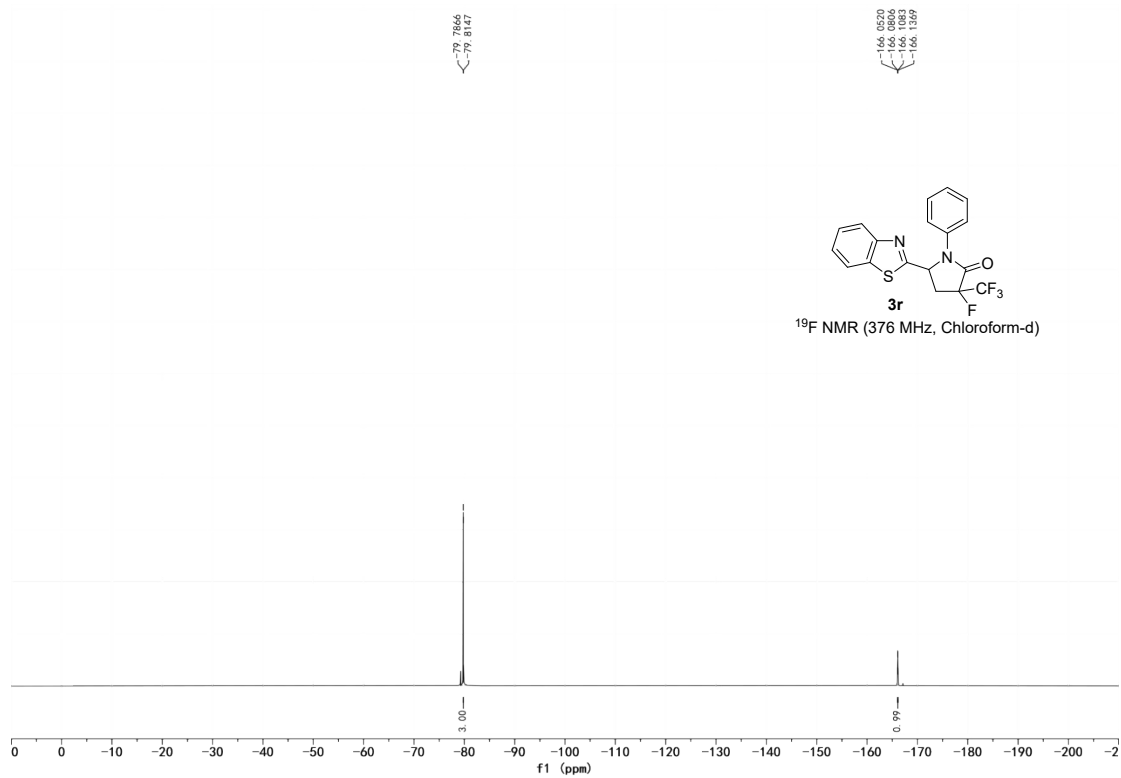



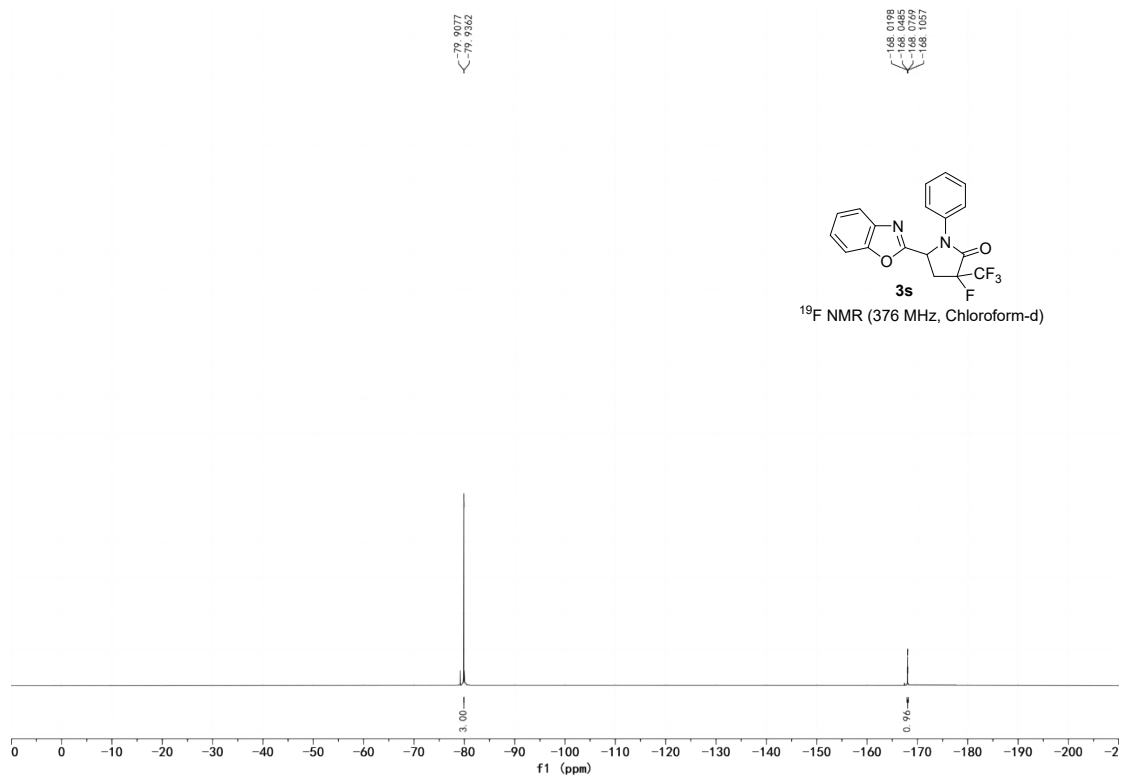





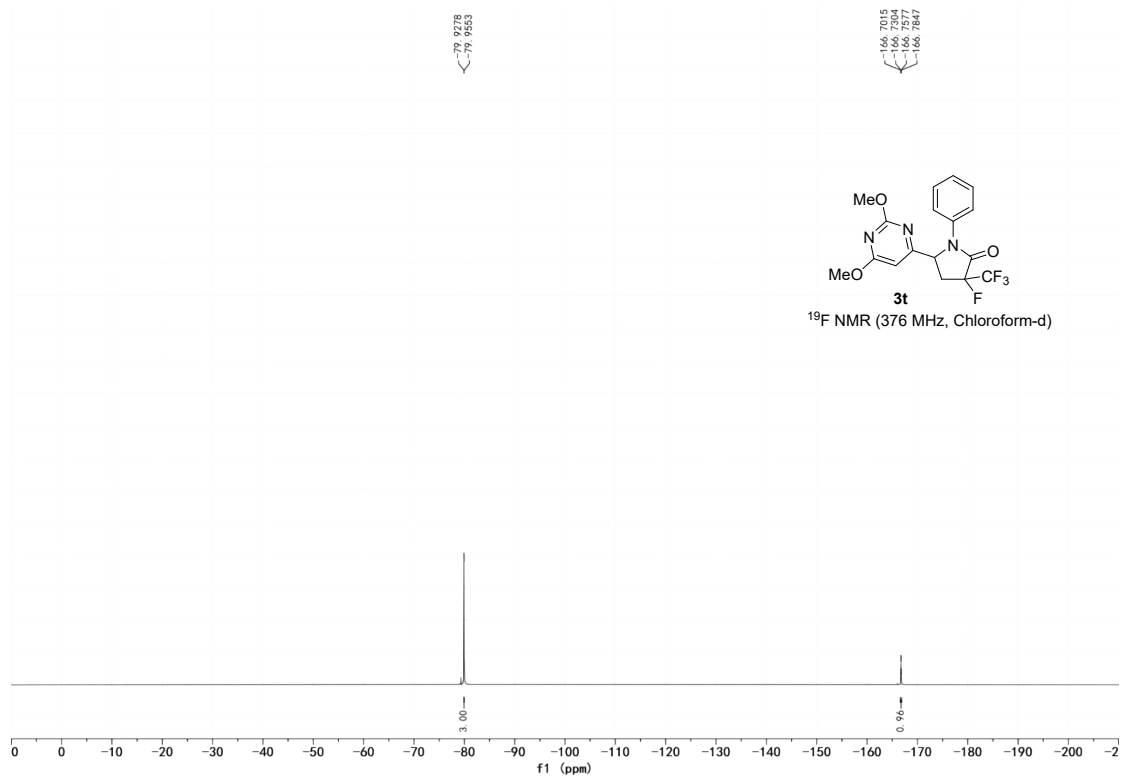



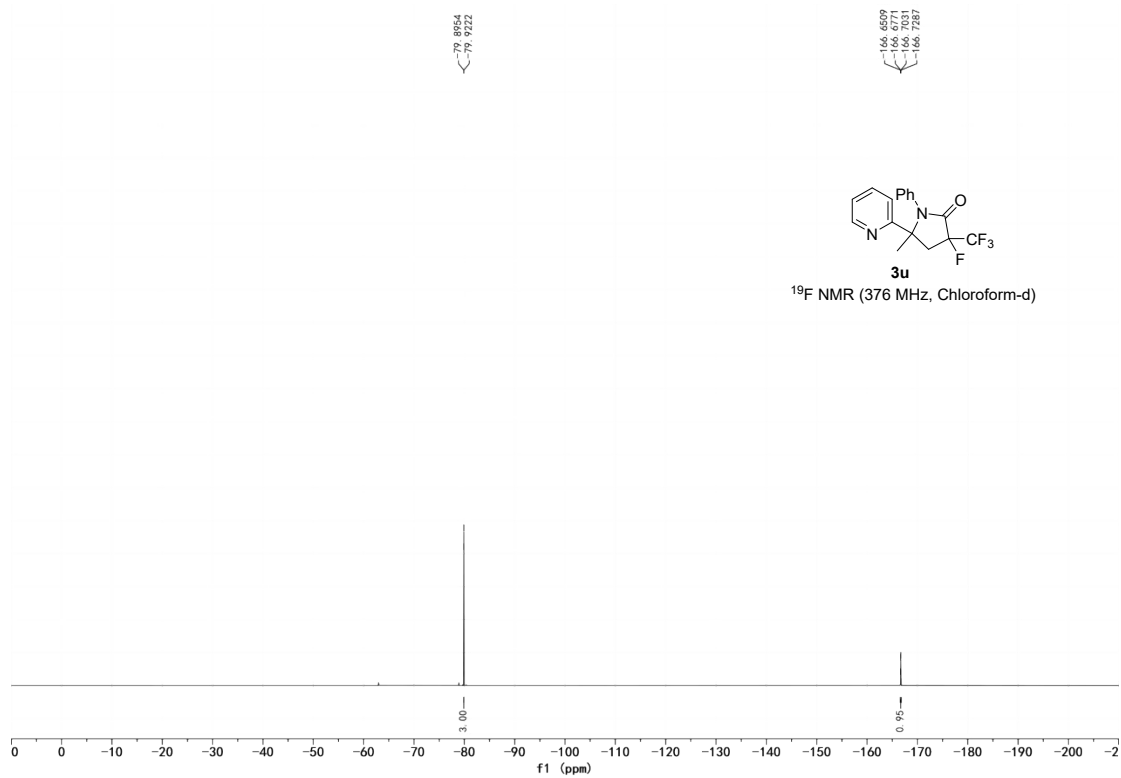

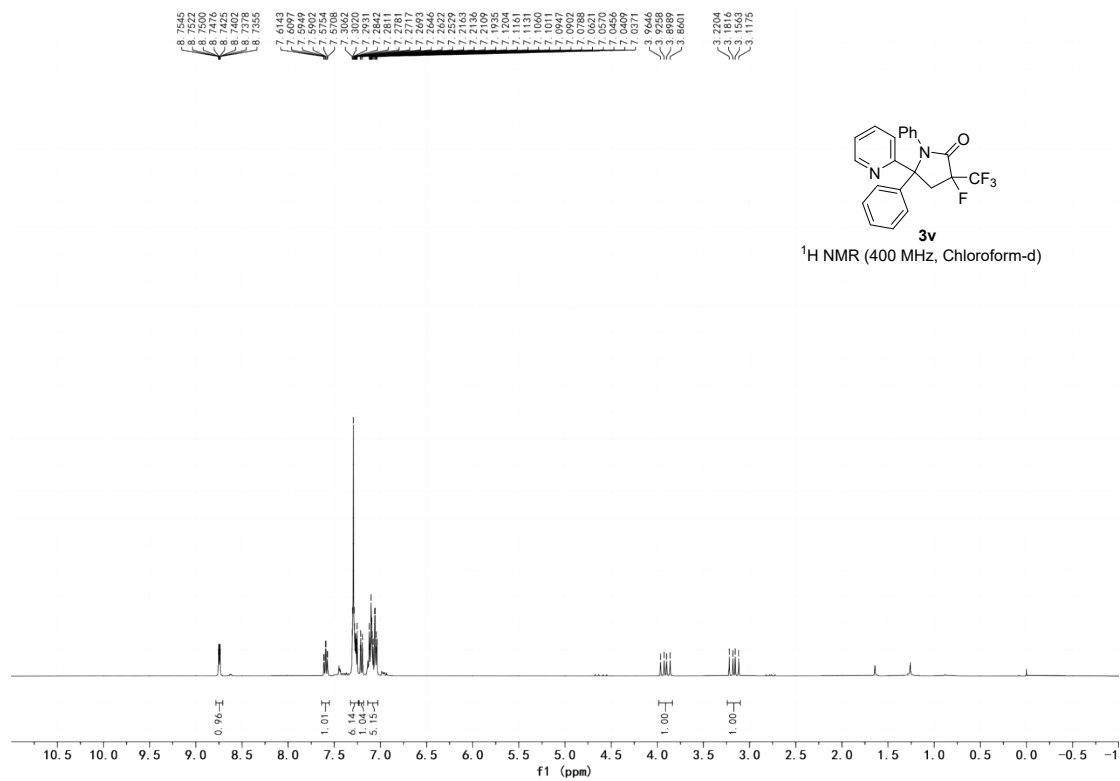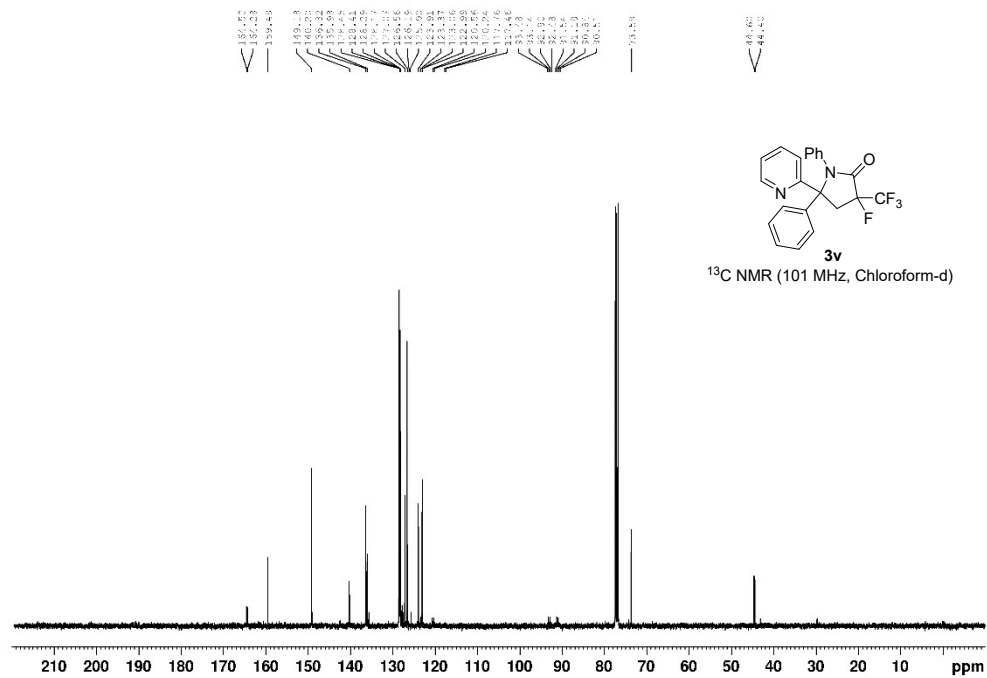

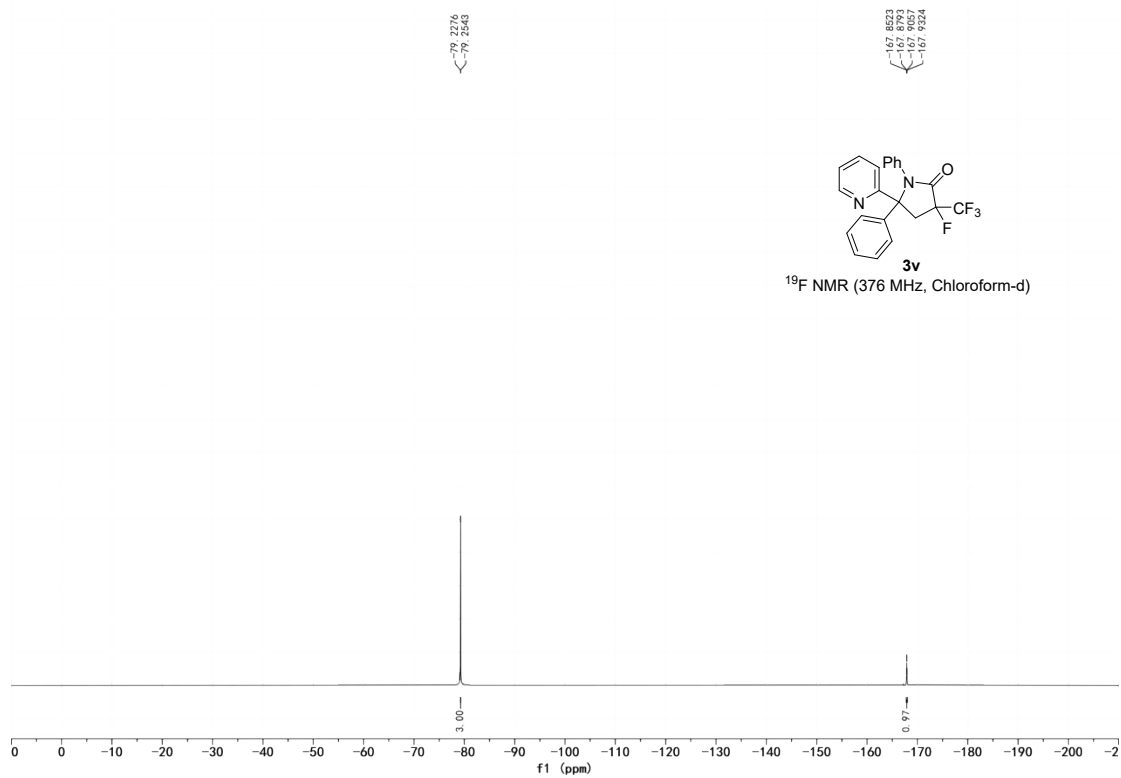

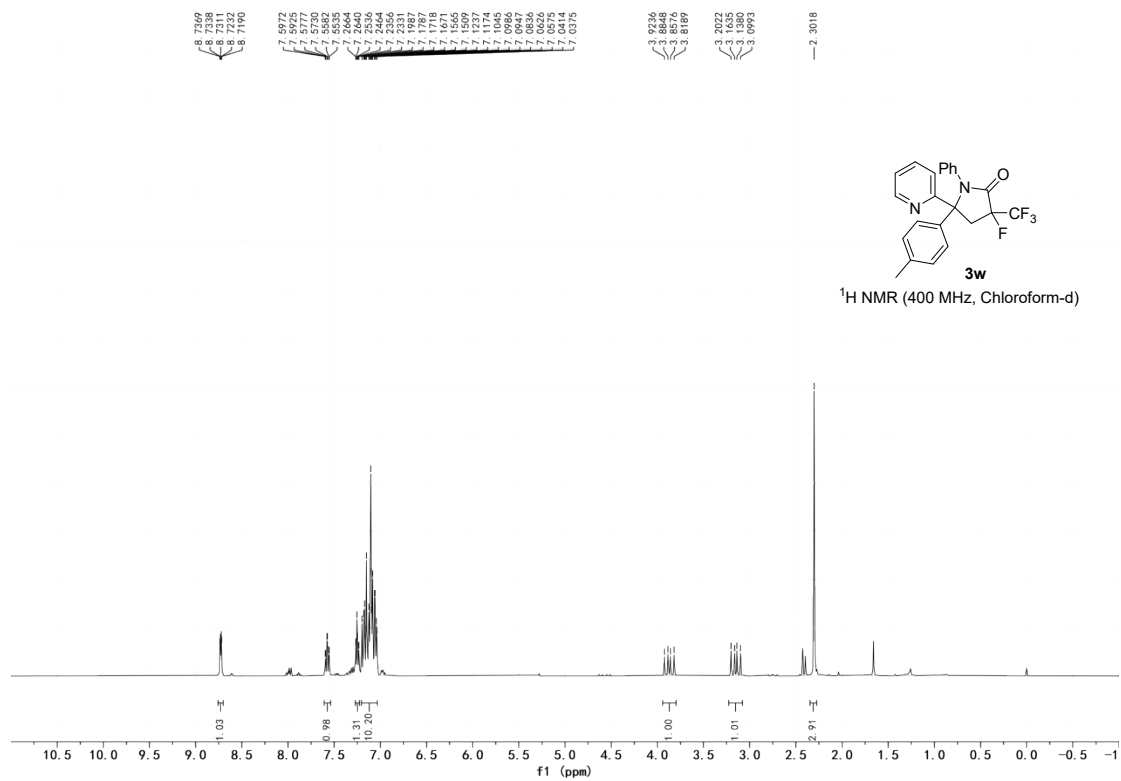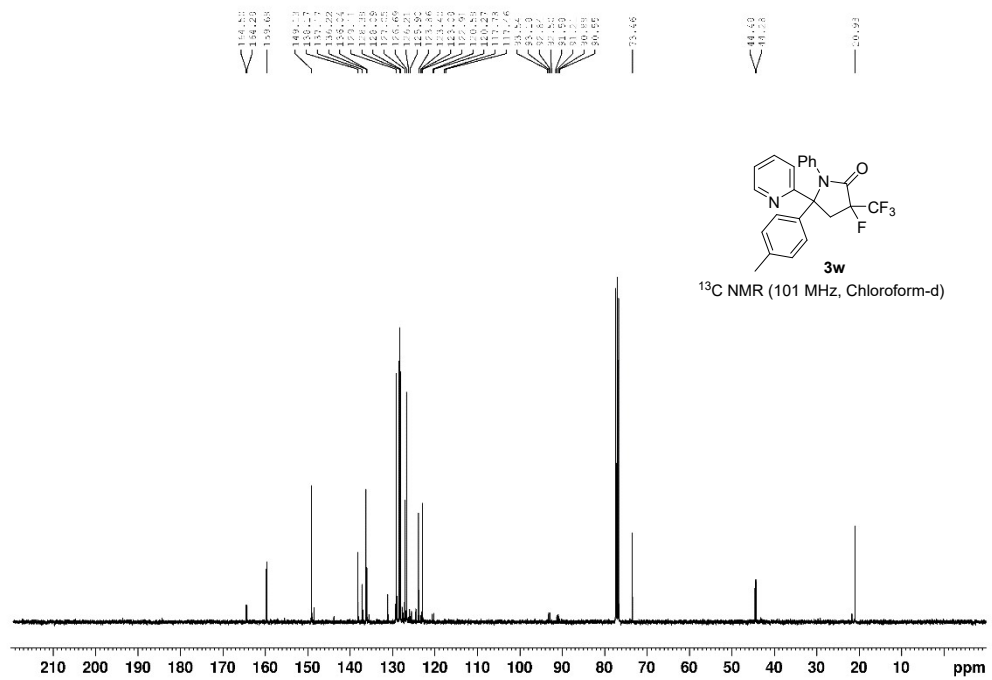

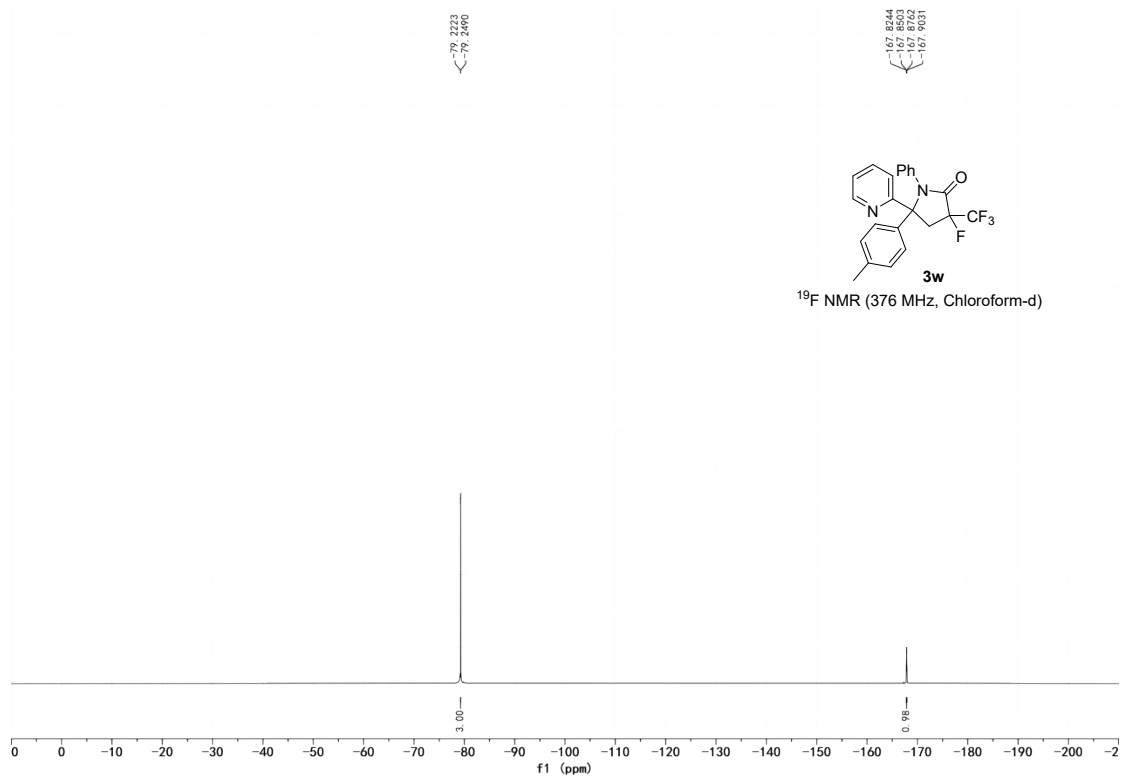



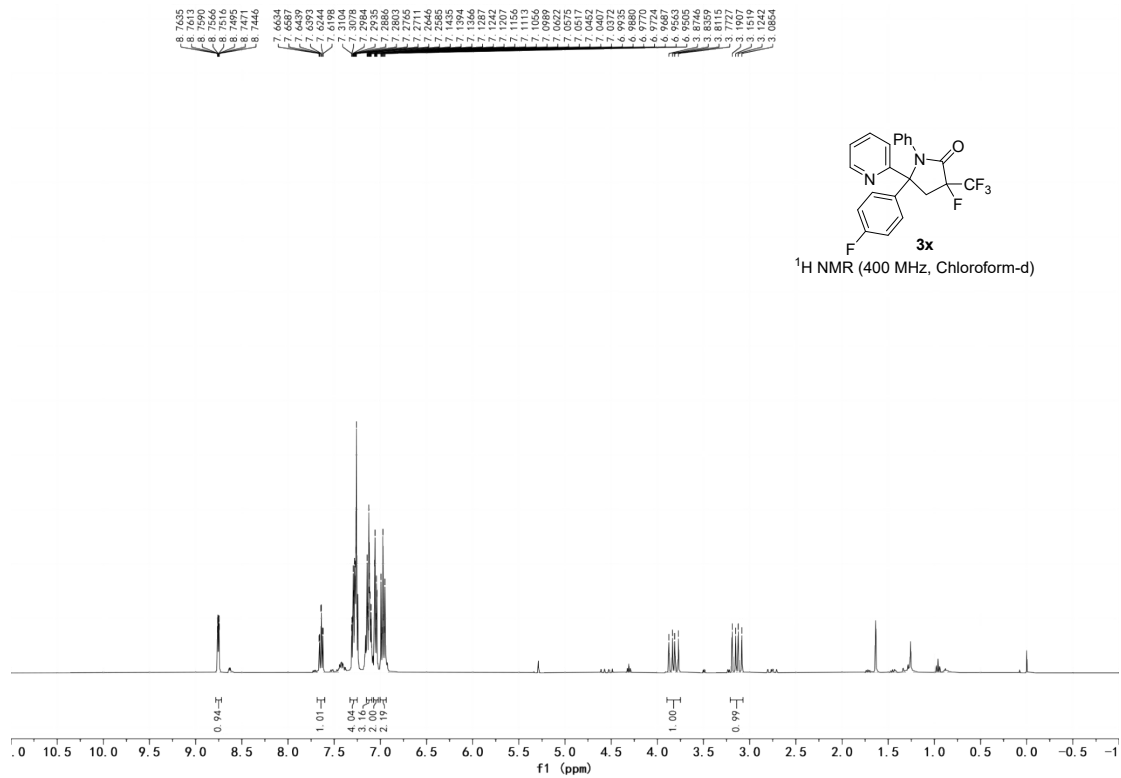

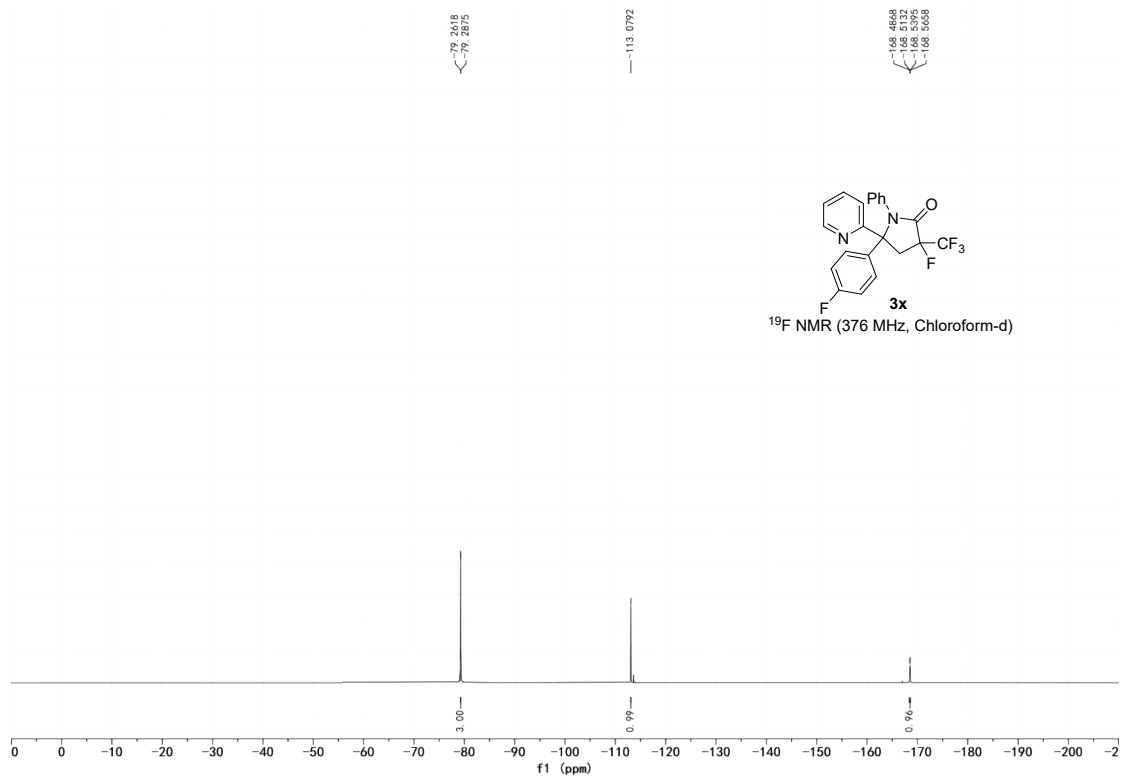



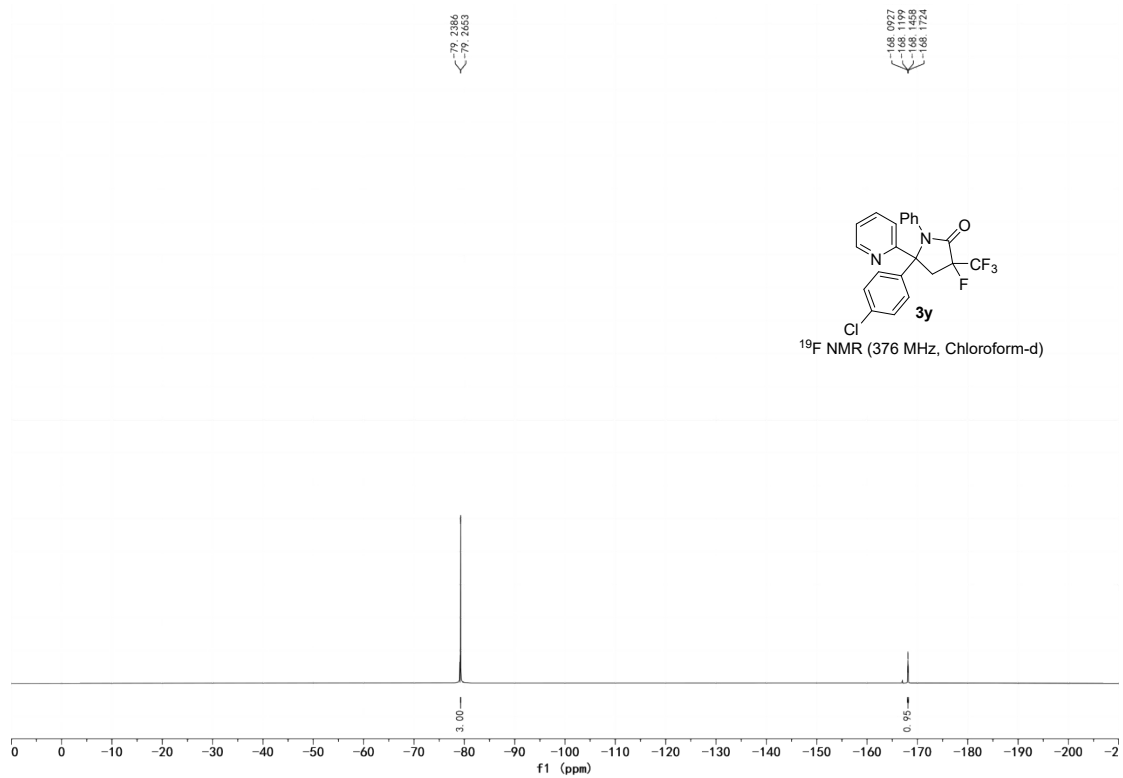

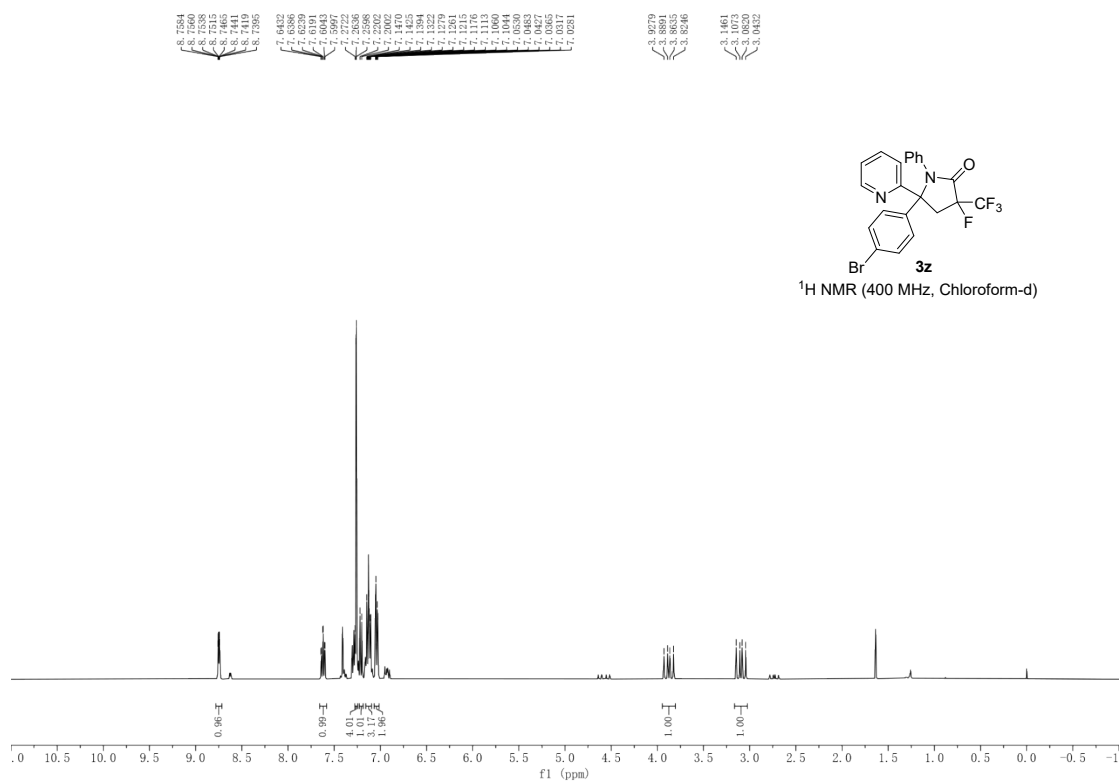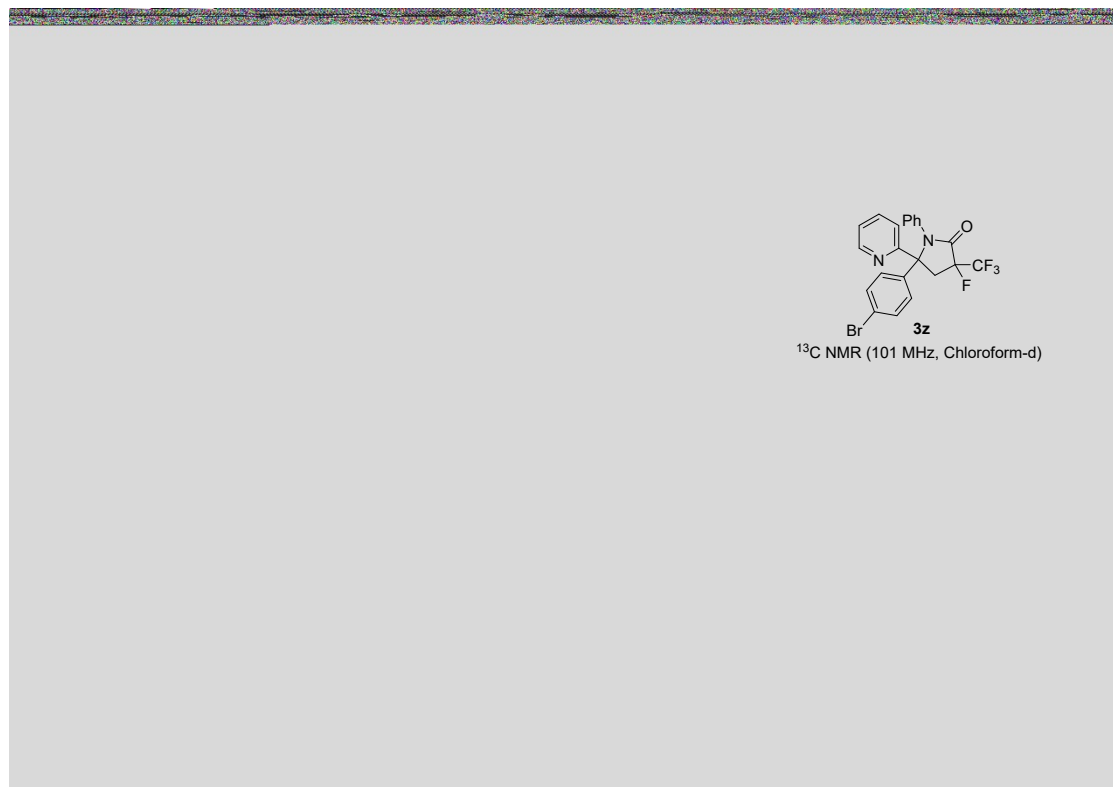

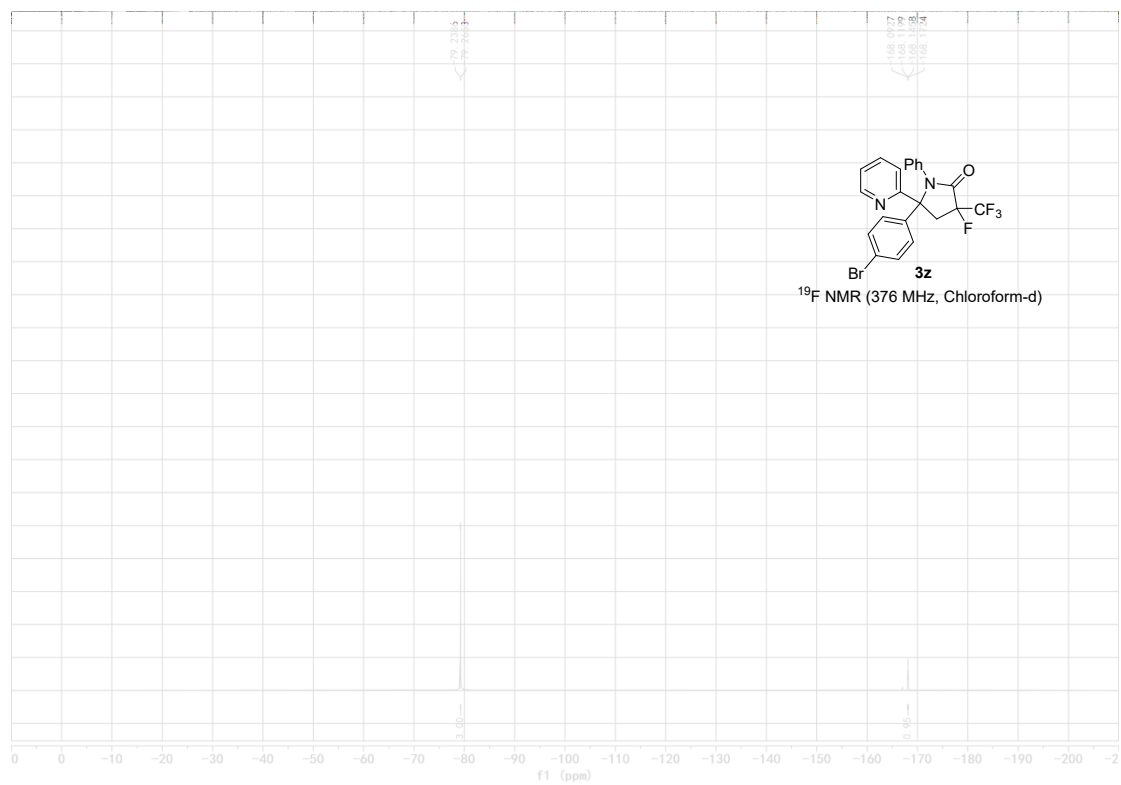



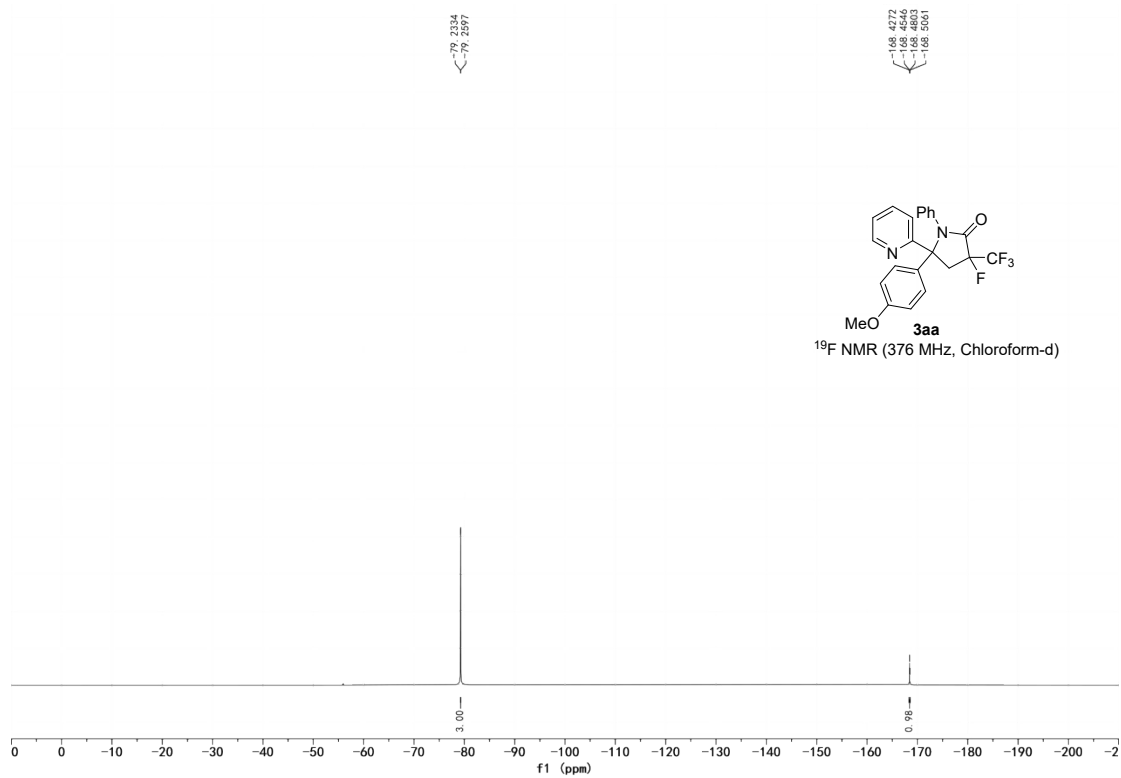





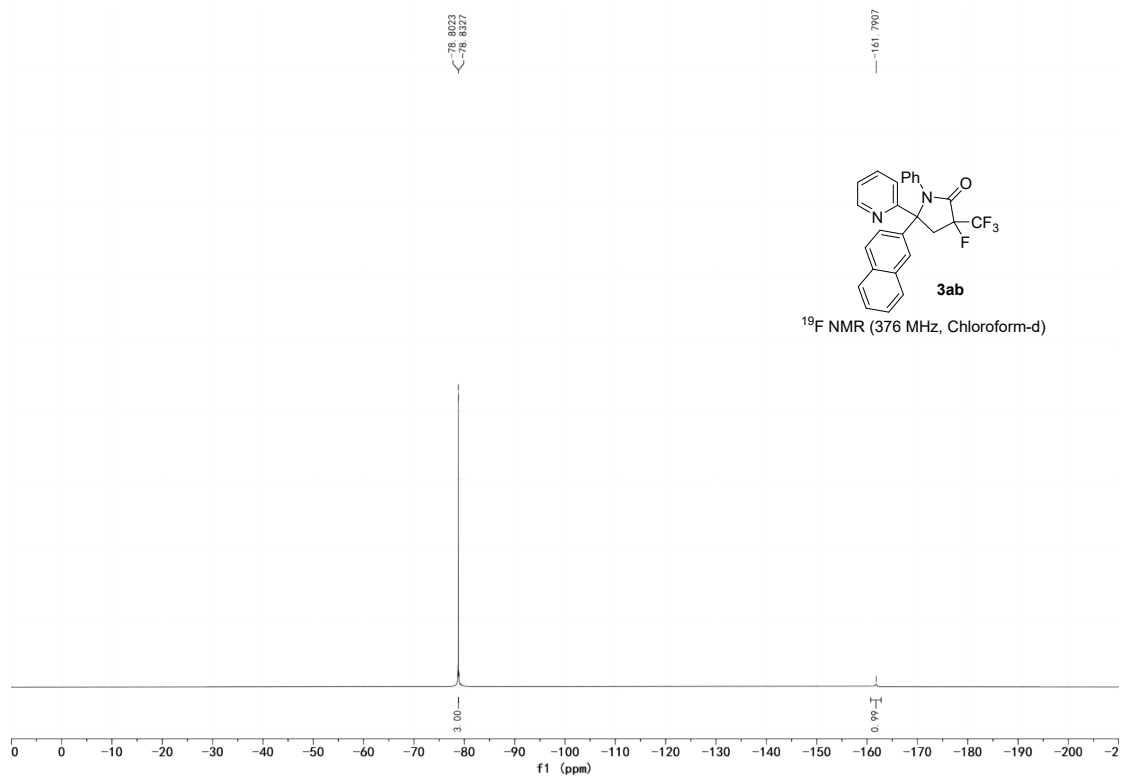



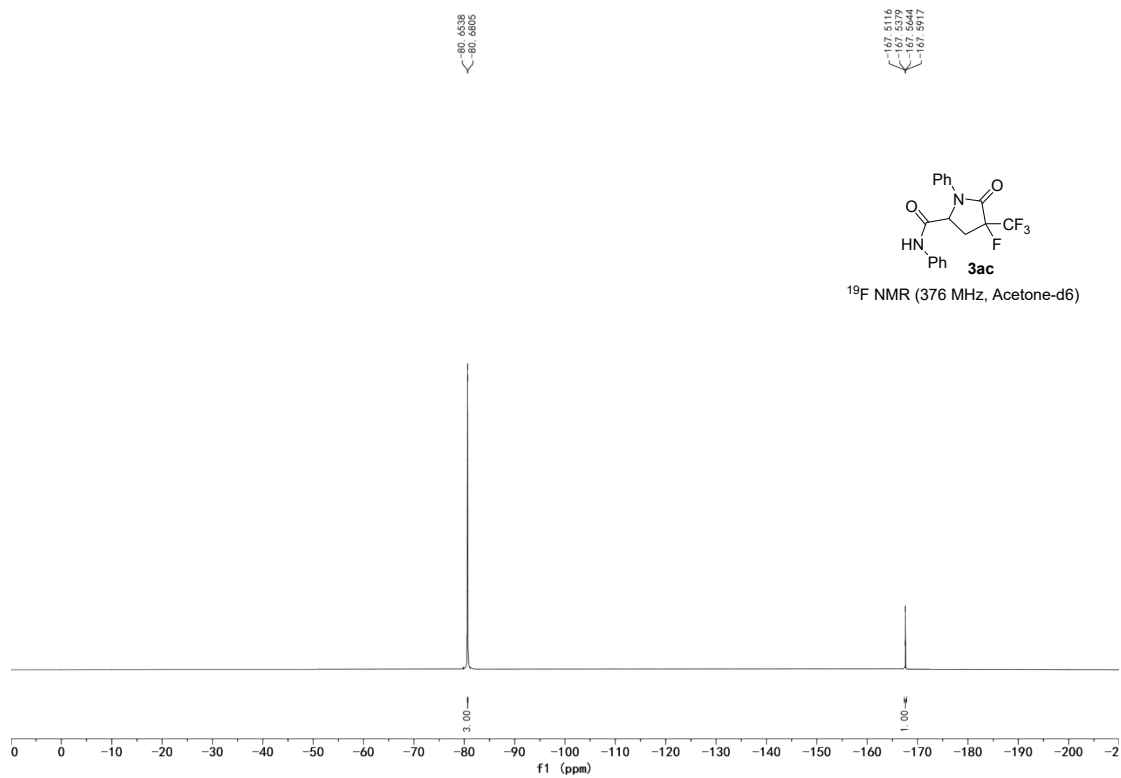

7.5595, 7.5584, 7.5065, 7.4967, 7.4876, 7.4835, 7.4706, 7.4556, 7.4477, 7.4458, 7.4316, 7.4273, 7.4114, 7.4072, 7.3985, 7.3377, 7.3347, 7.3191, 7.3141, 7.3004, 7.2907, 7.2925, 7.2787, 7.2649, 7.0498, 7.0489, 4.6435, 4.6333, 4.6242, 4.6200, 4.6115, 4.6108, 4.6004  
 3.2103, 2.7074, 2.7049, 2.6977, 2.6707, 2.6512, 2.6385, 2.6228, 2.6151, 2.6017, 2.5985, 2.5855, 2.5827, 2.5644, 2.5512, 2.5485, 2.5464

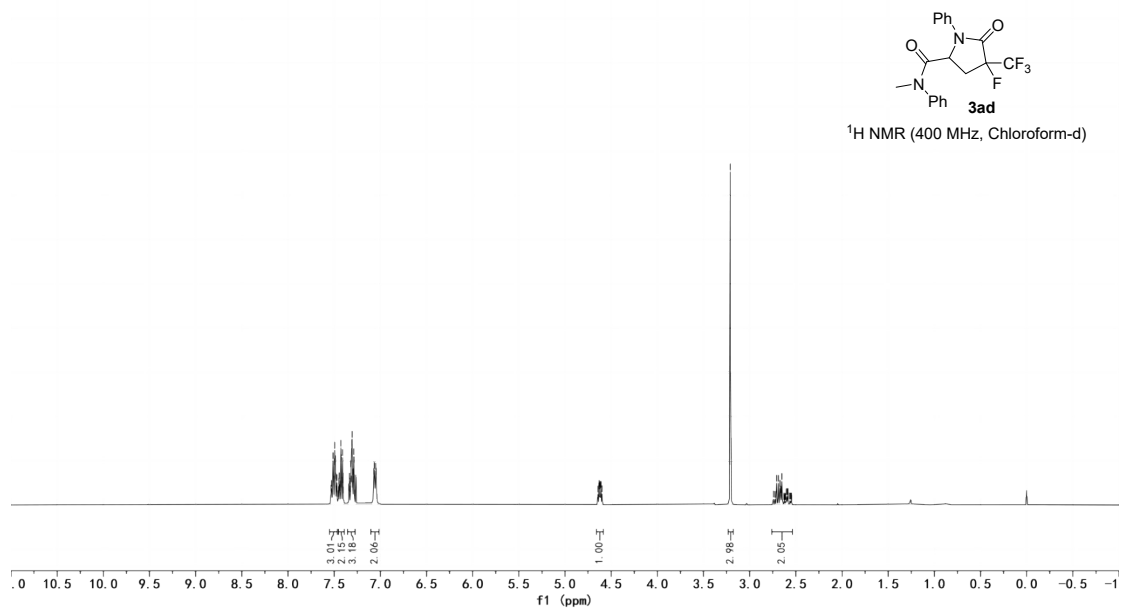

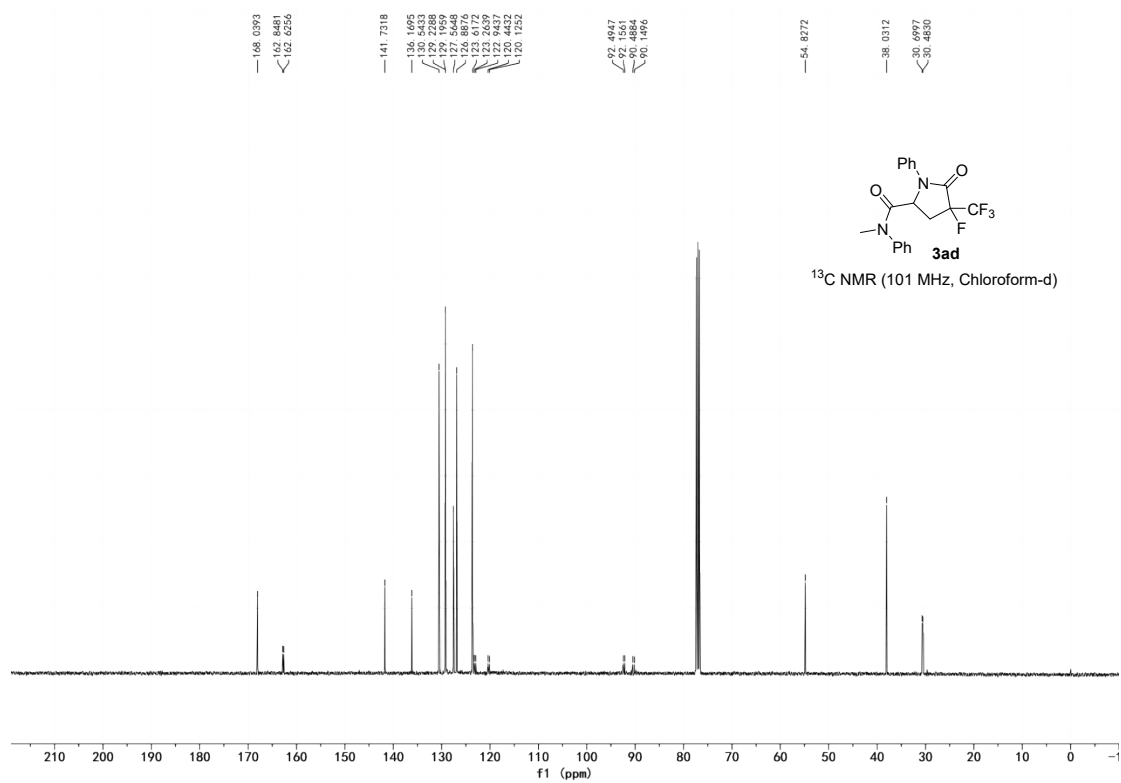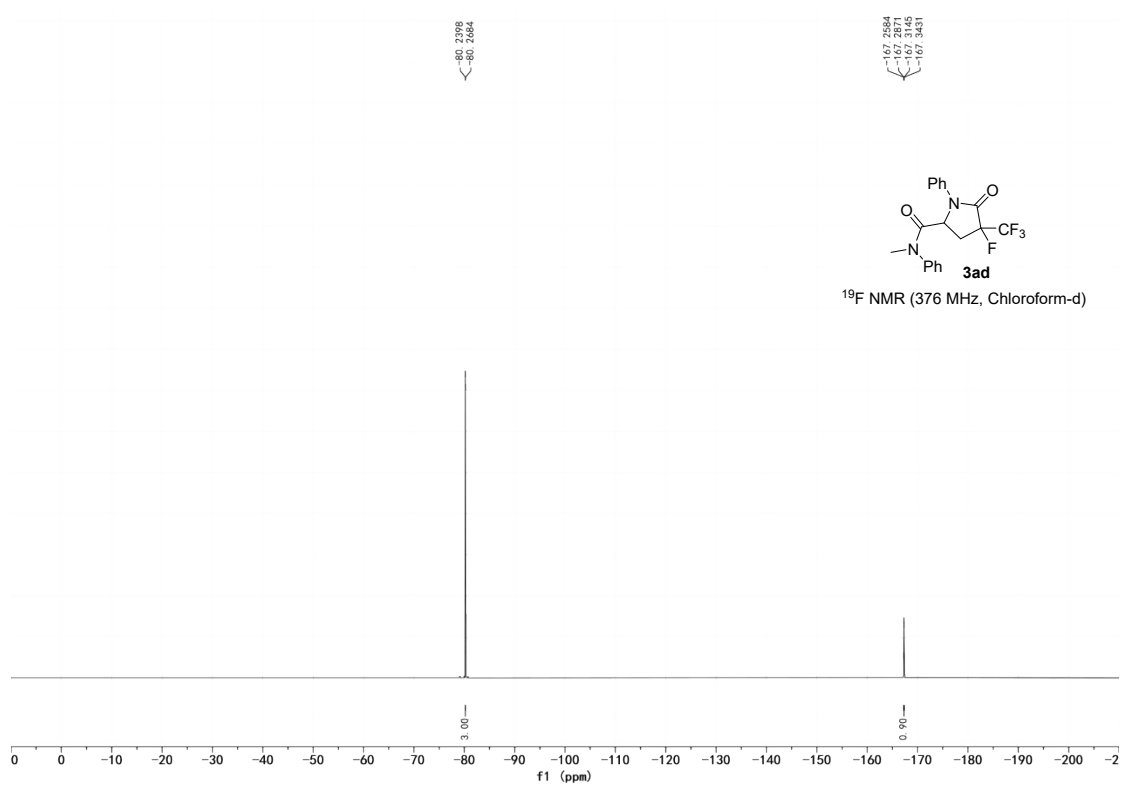



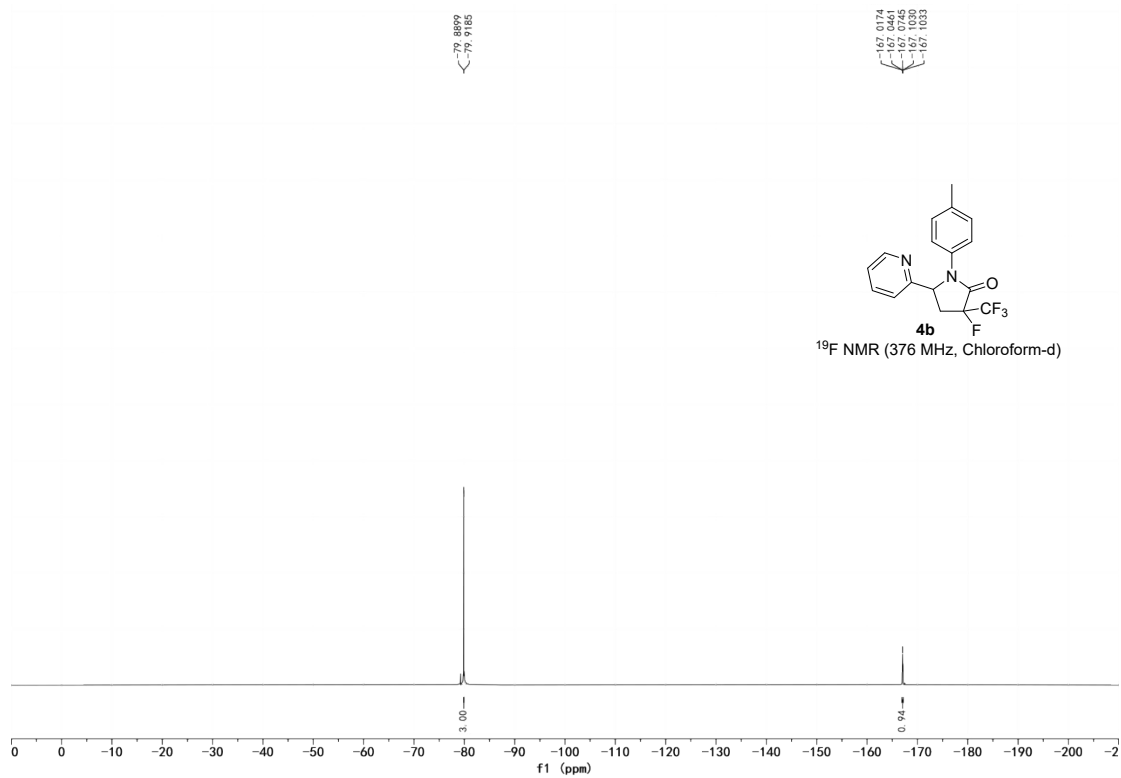

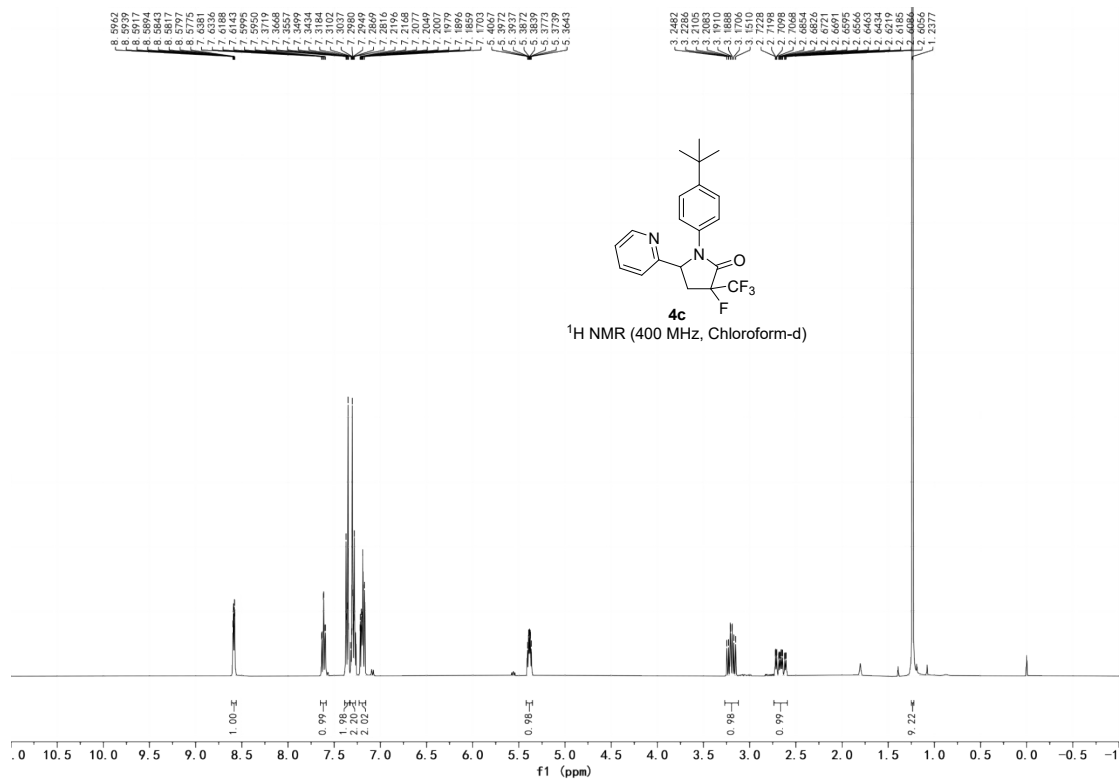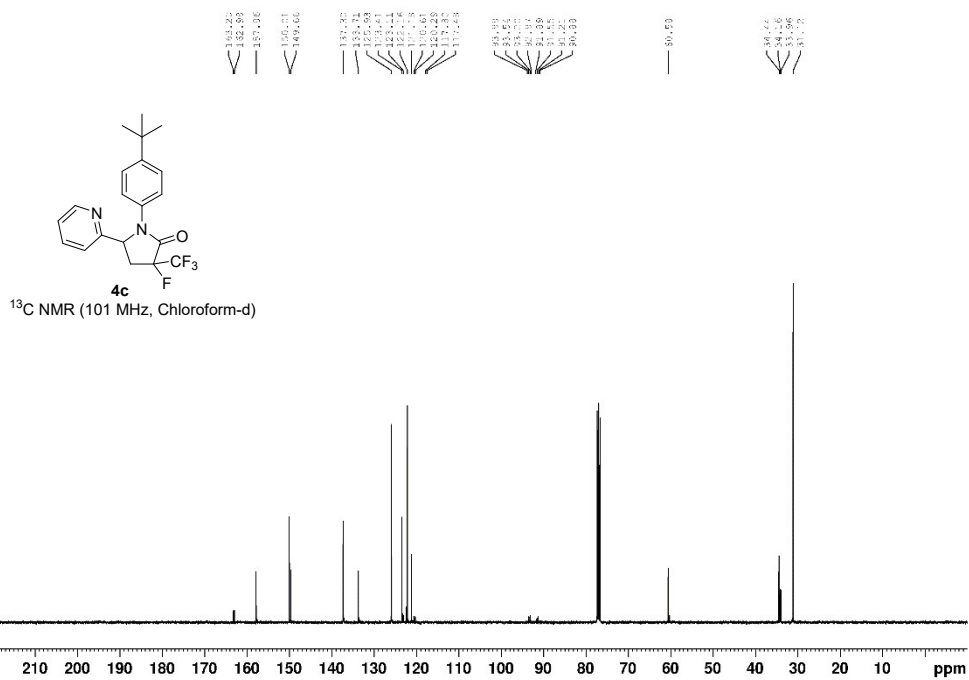





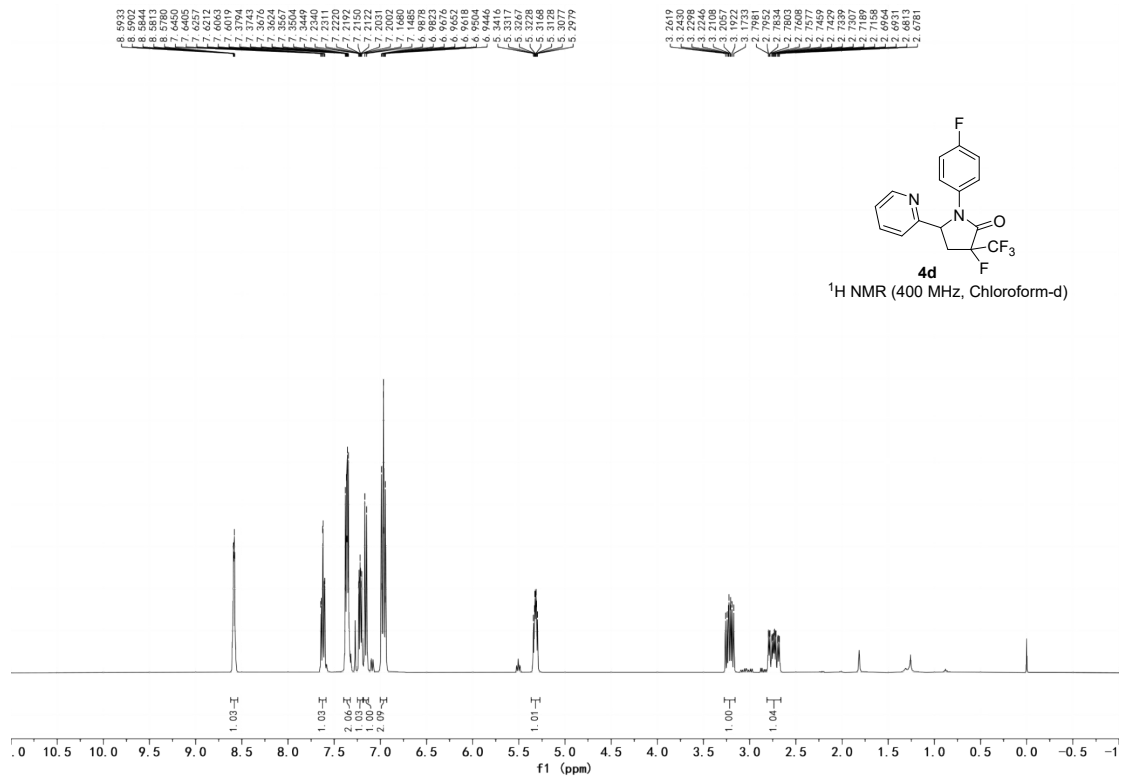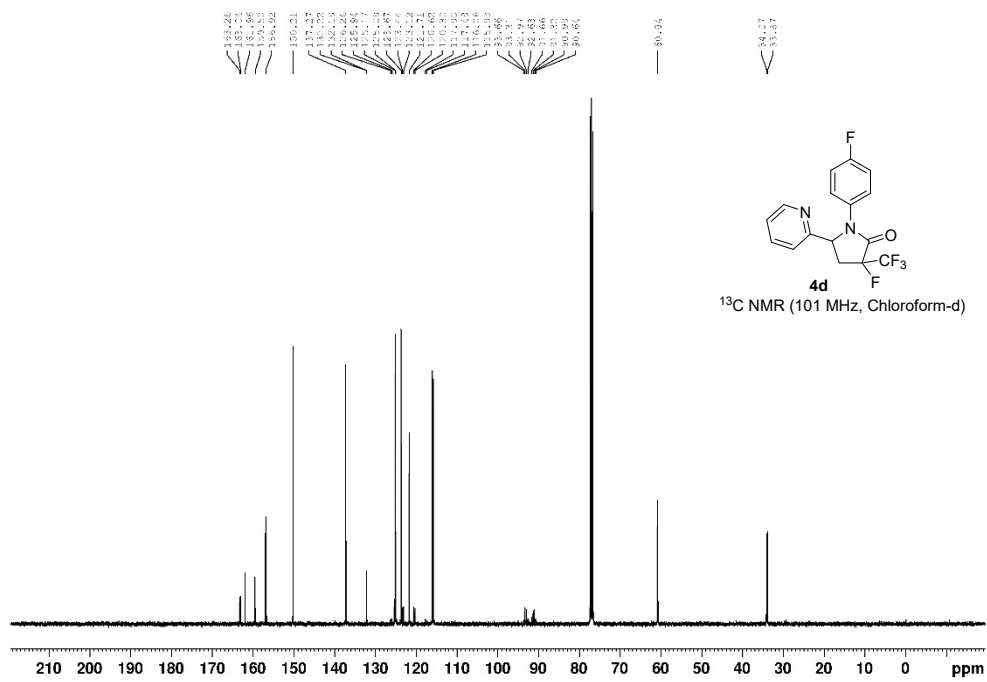

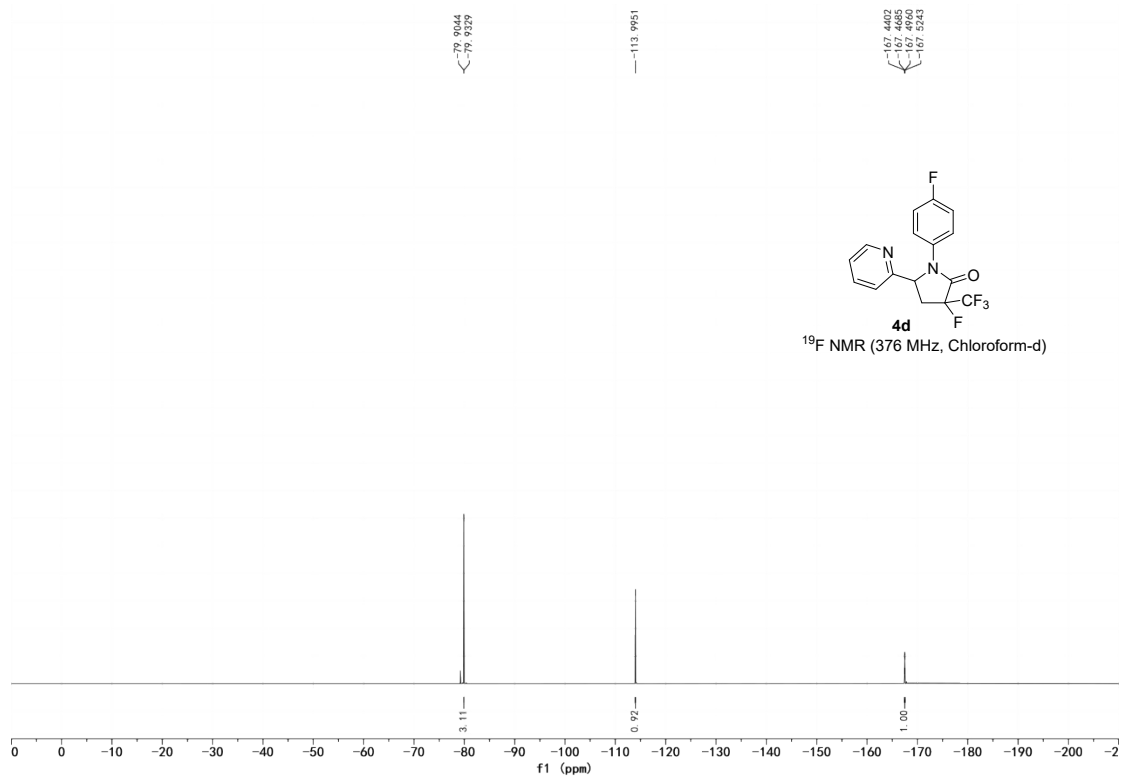



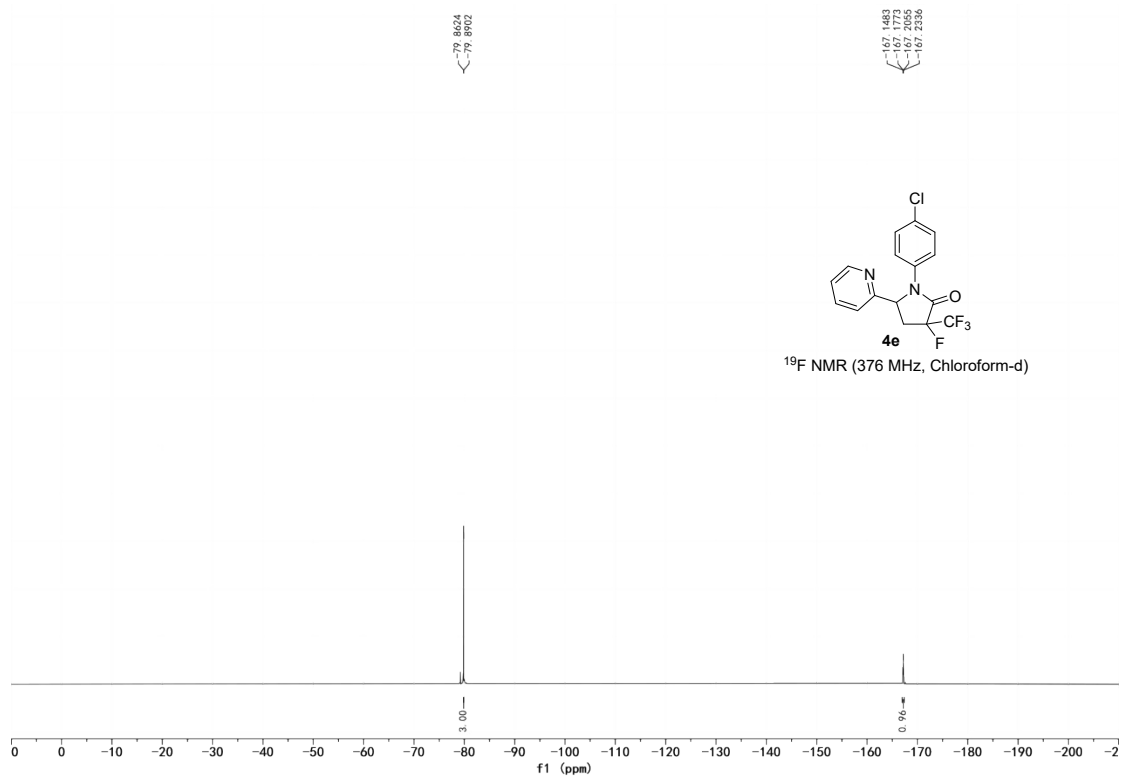

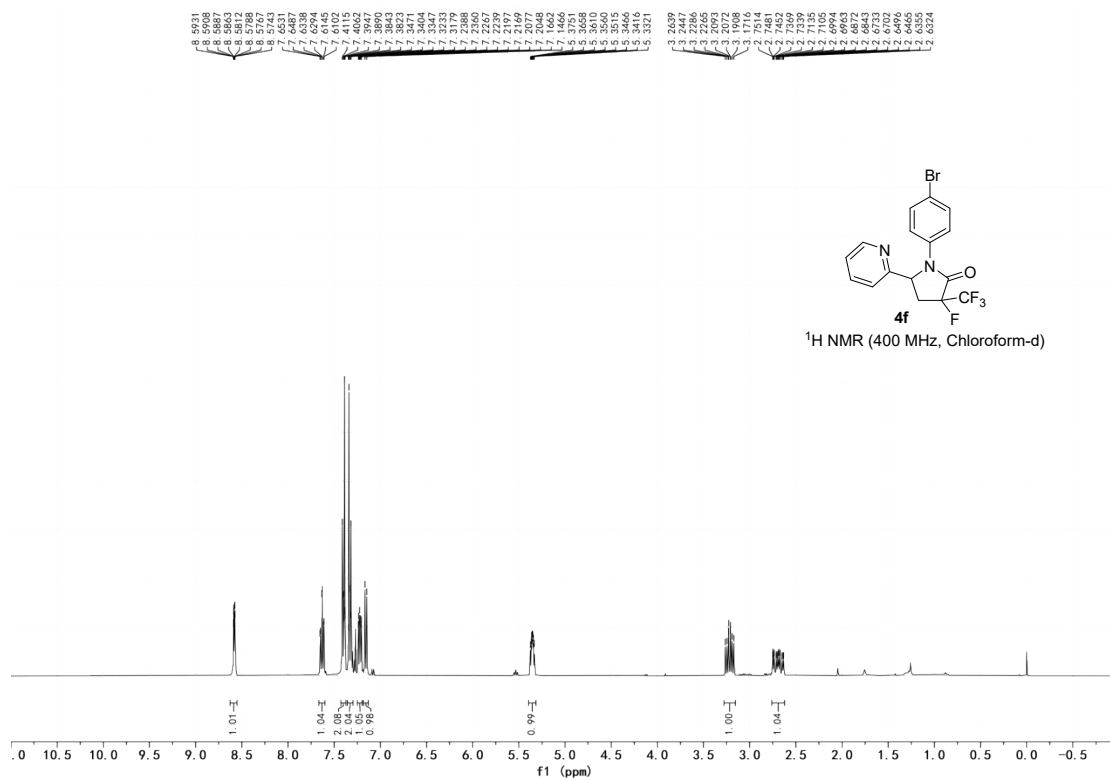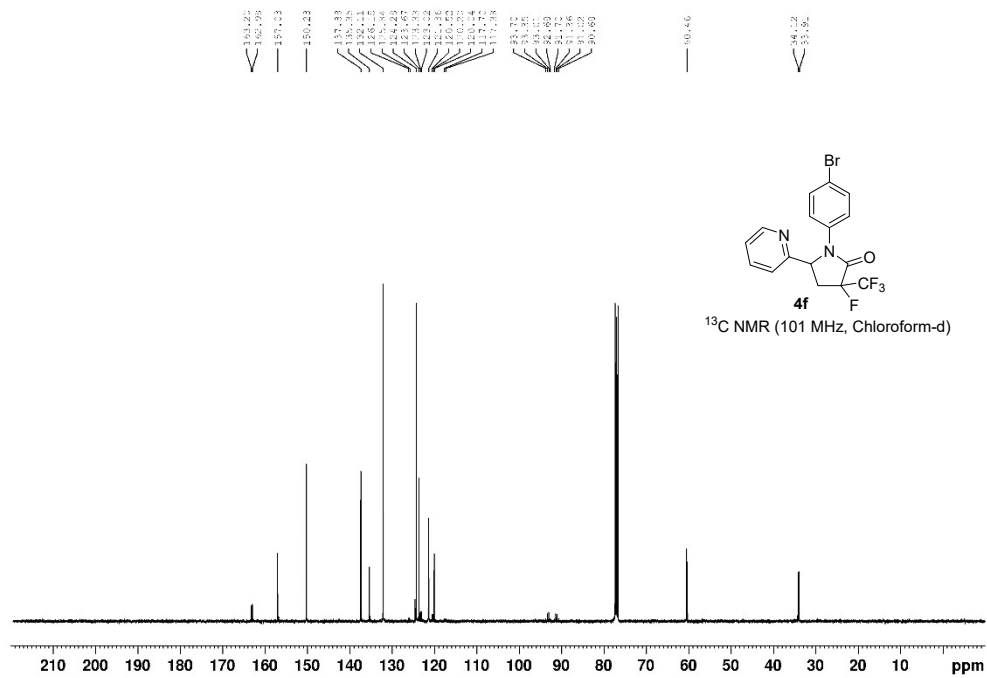

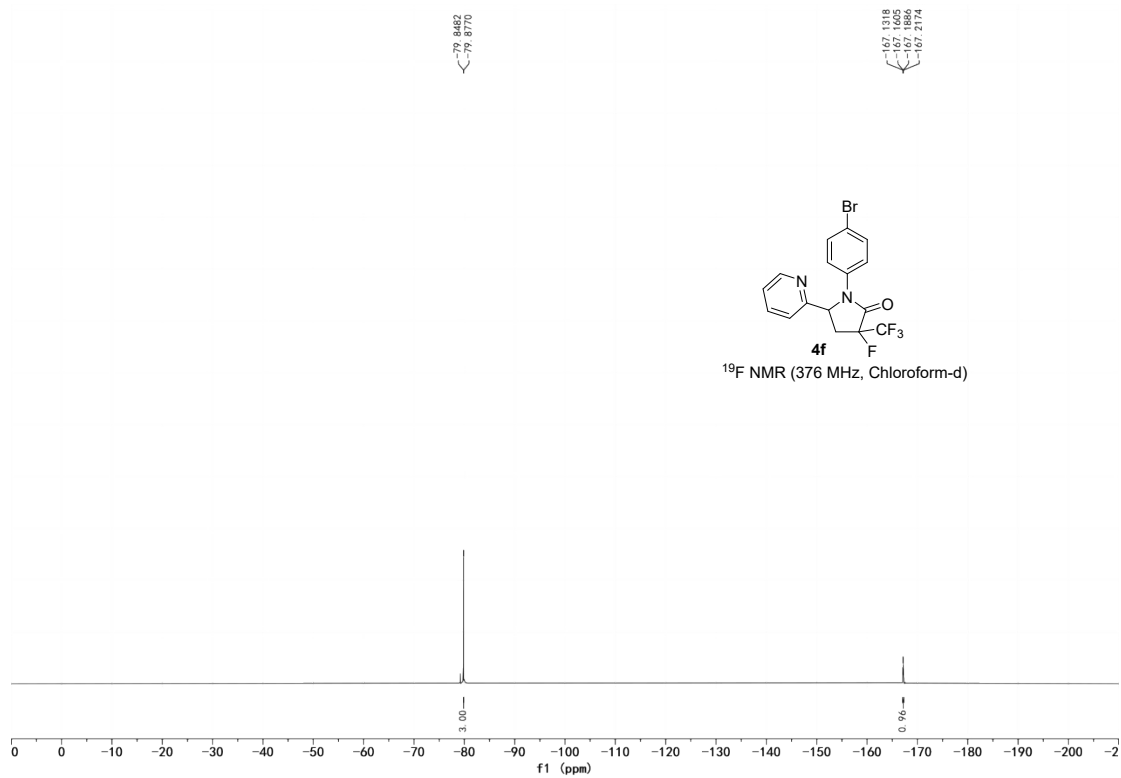





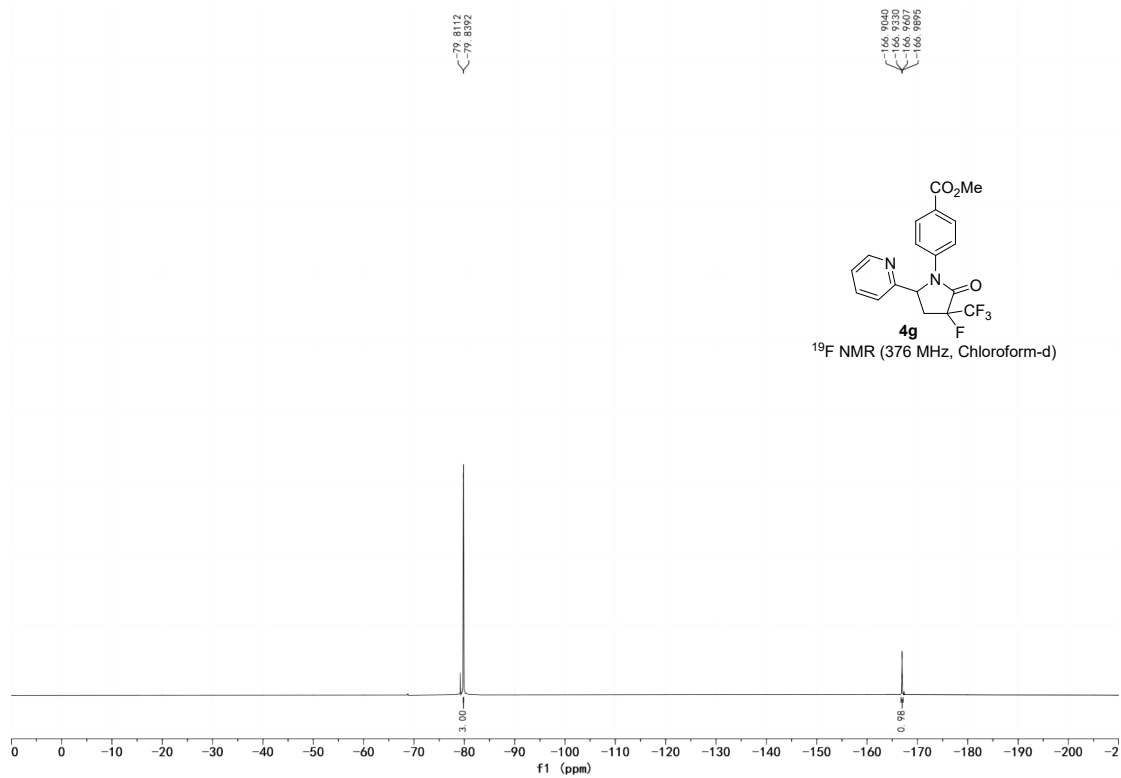



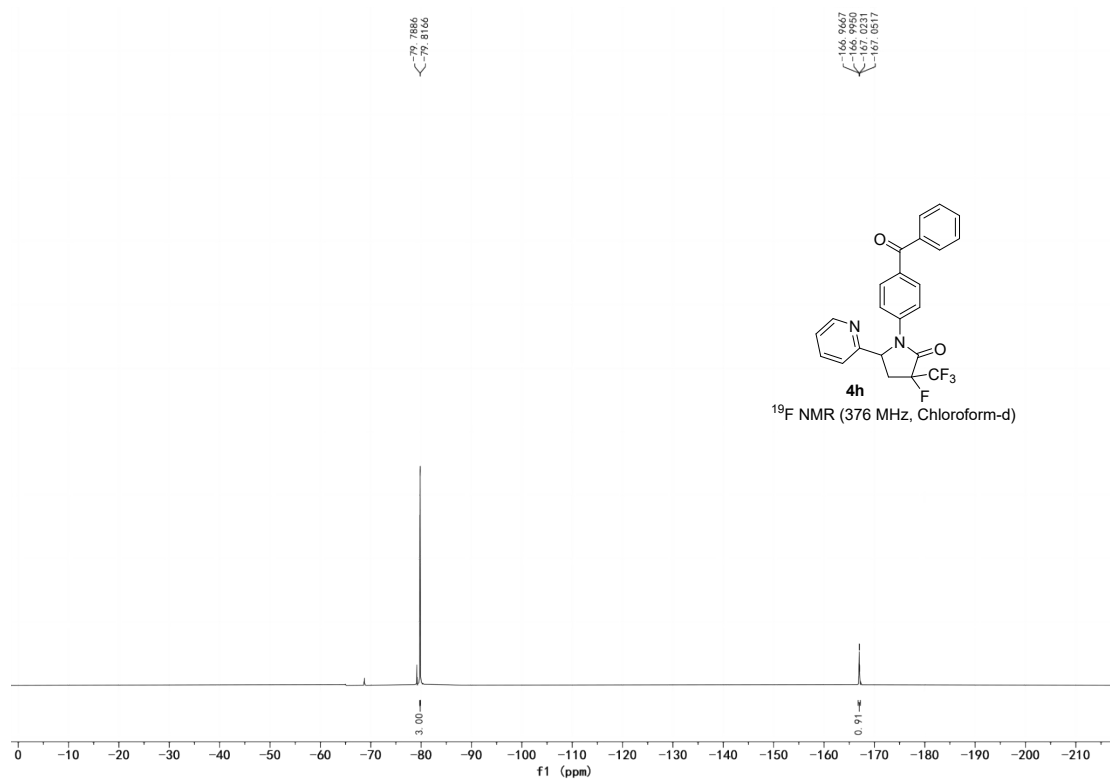



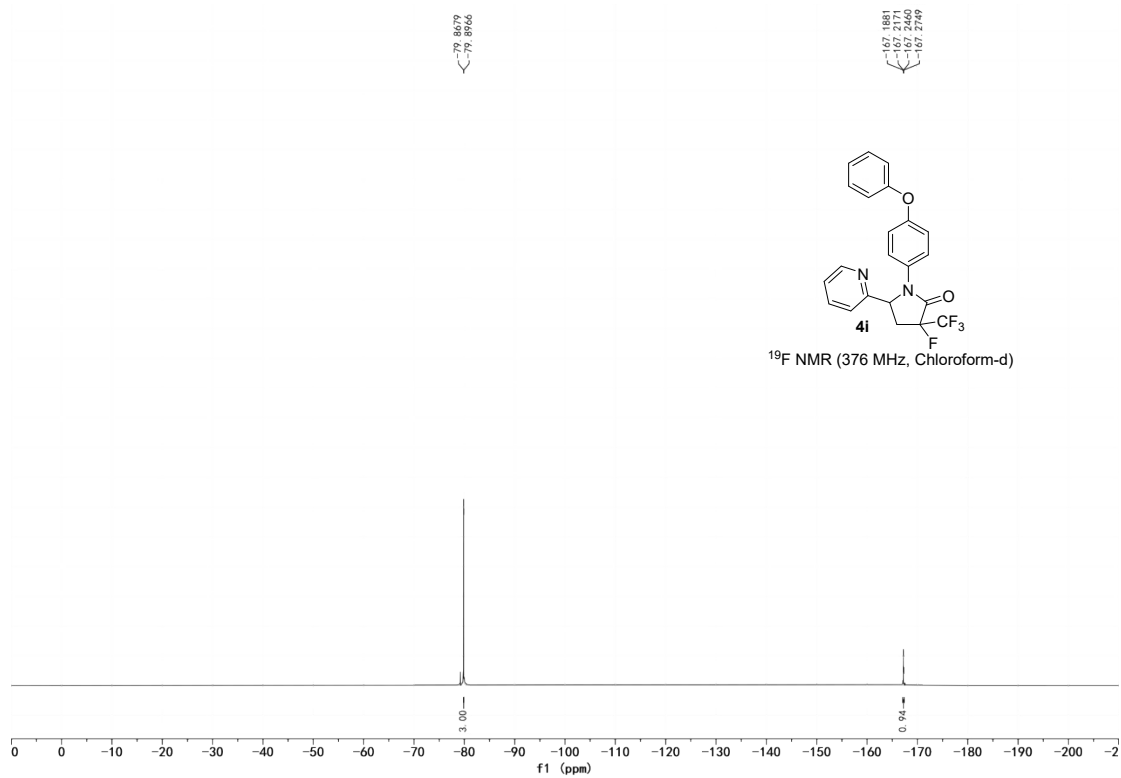



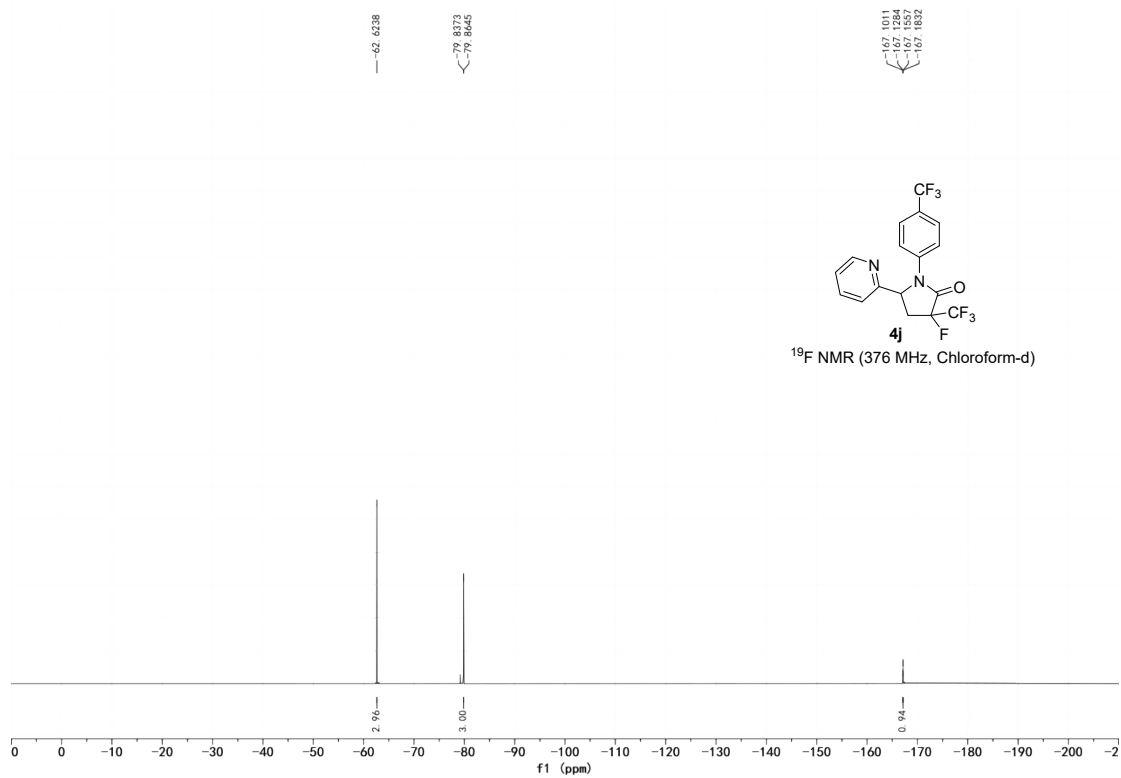

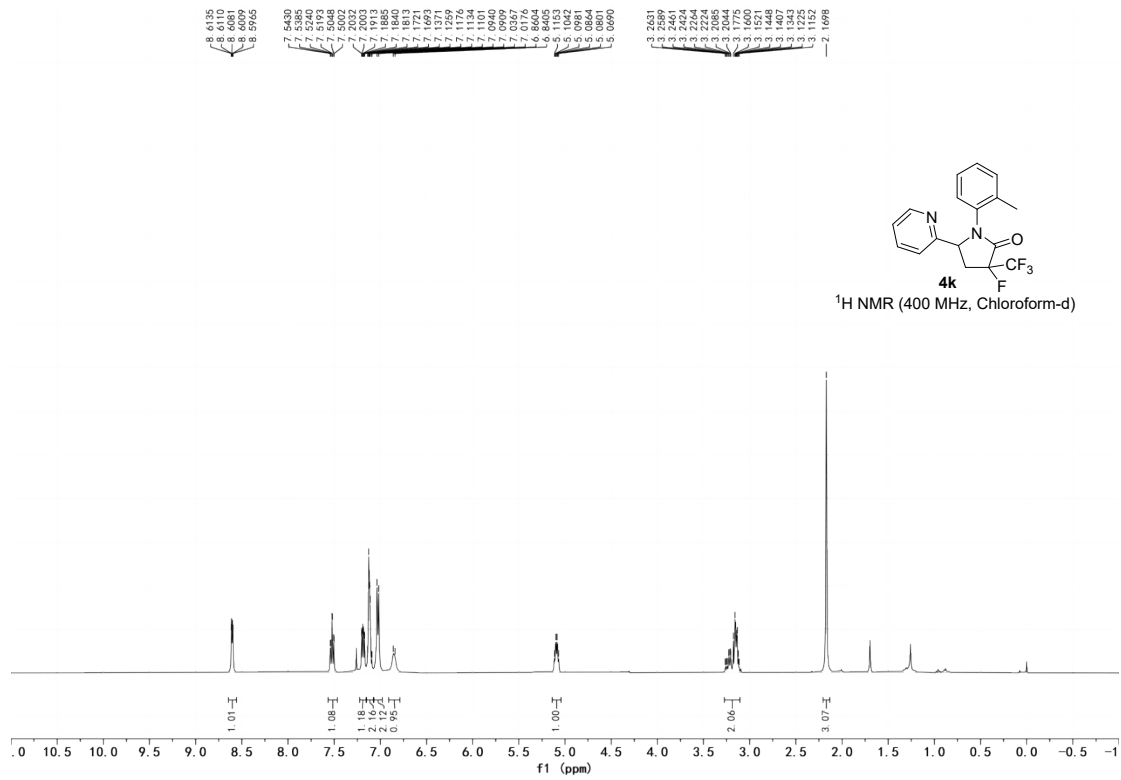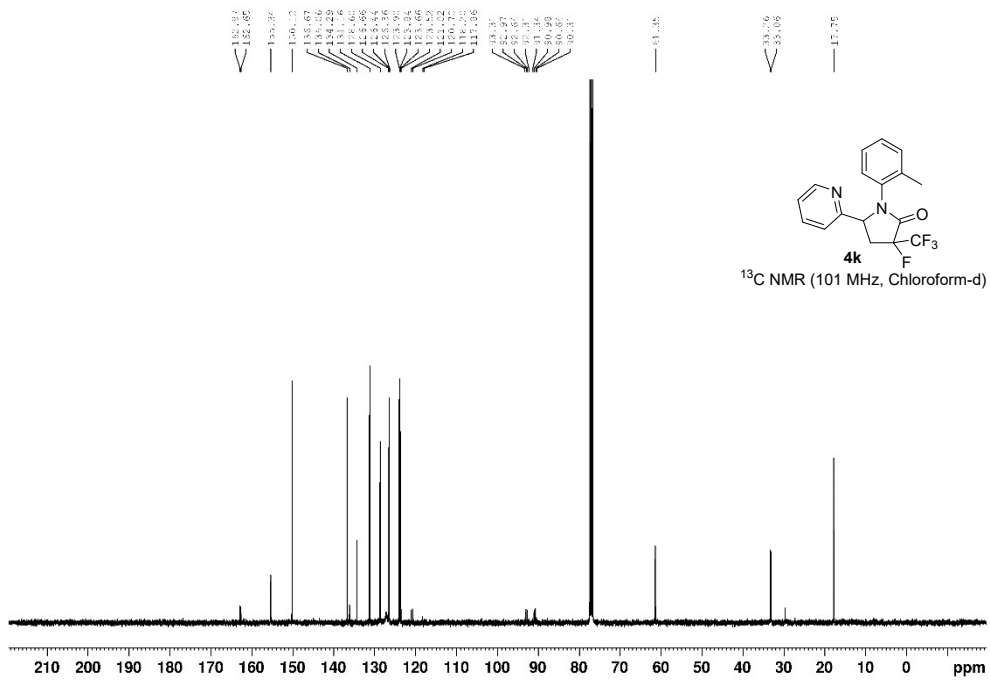



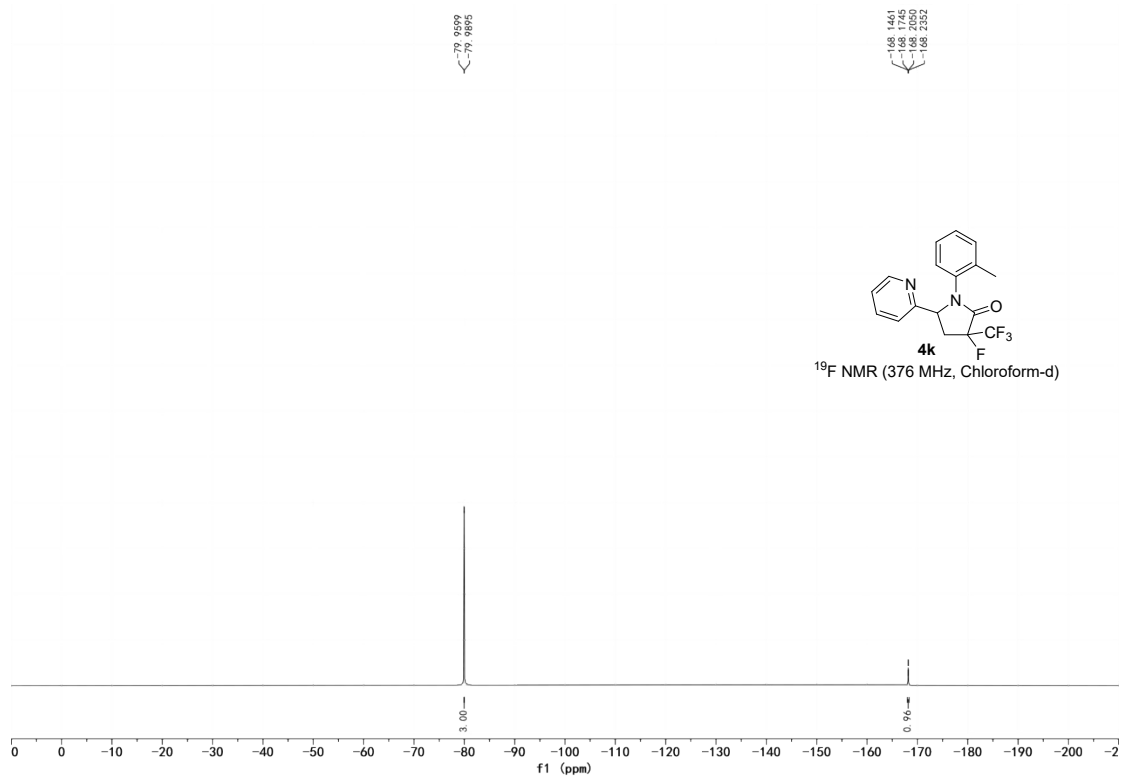



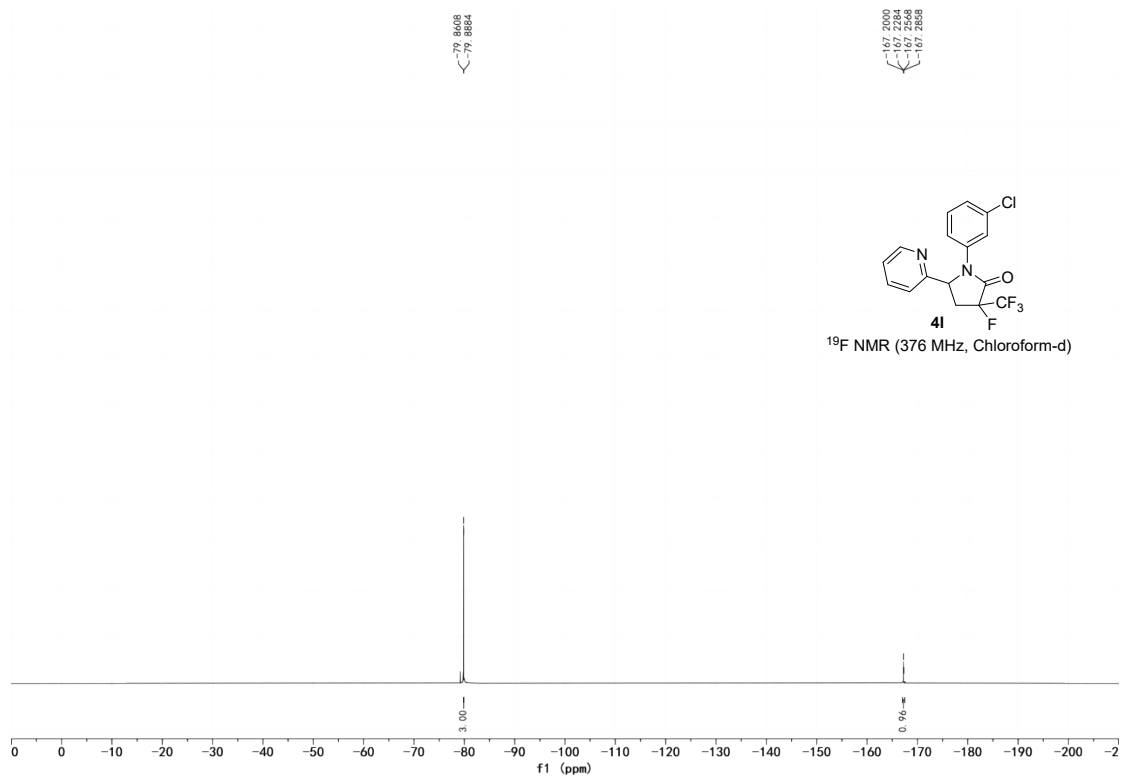

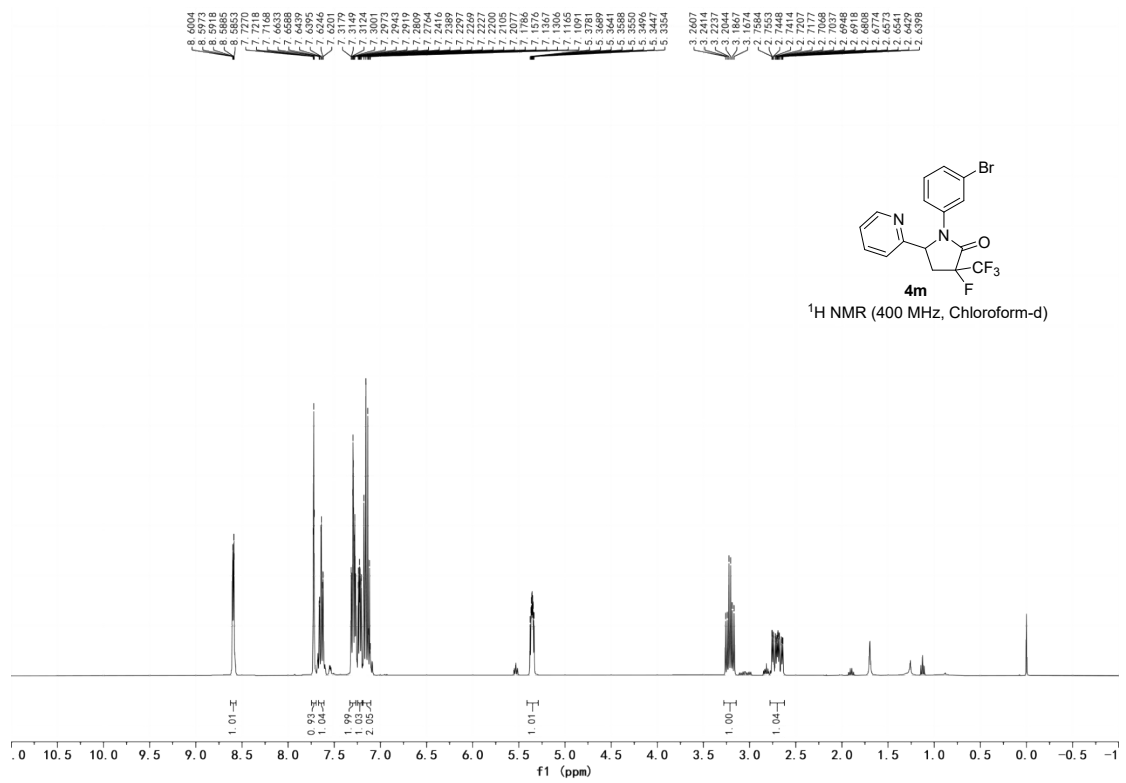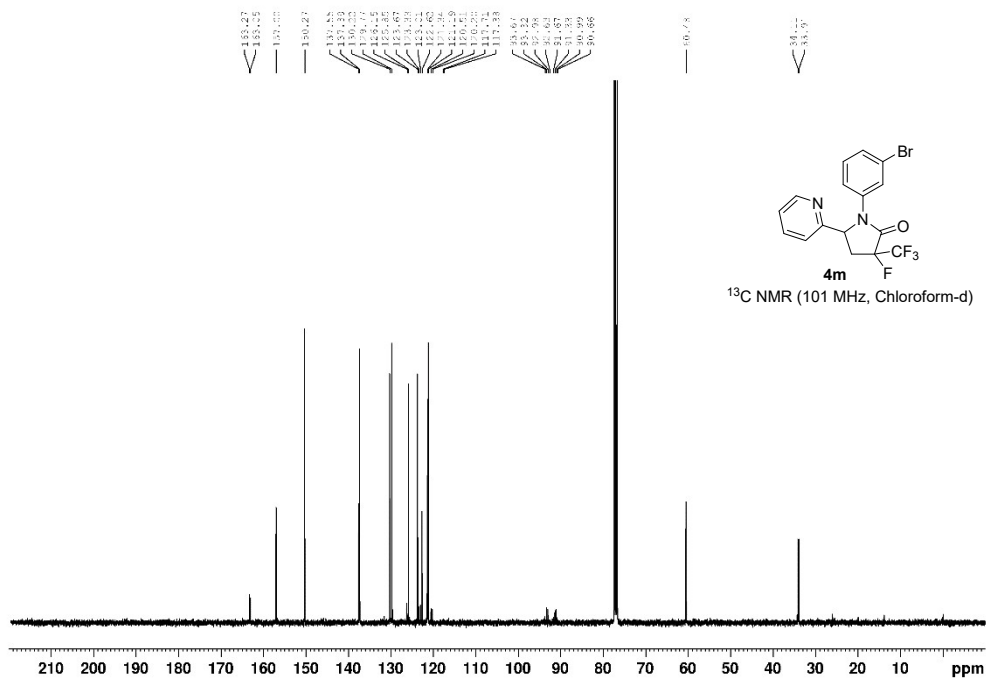

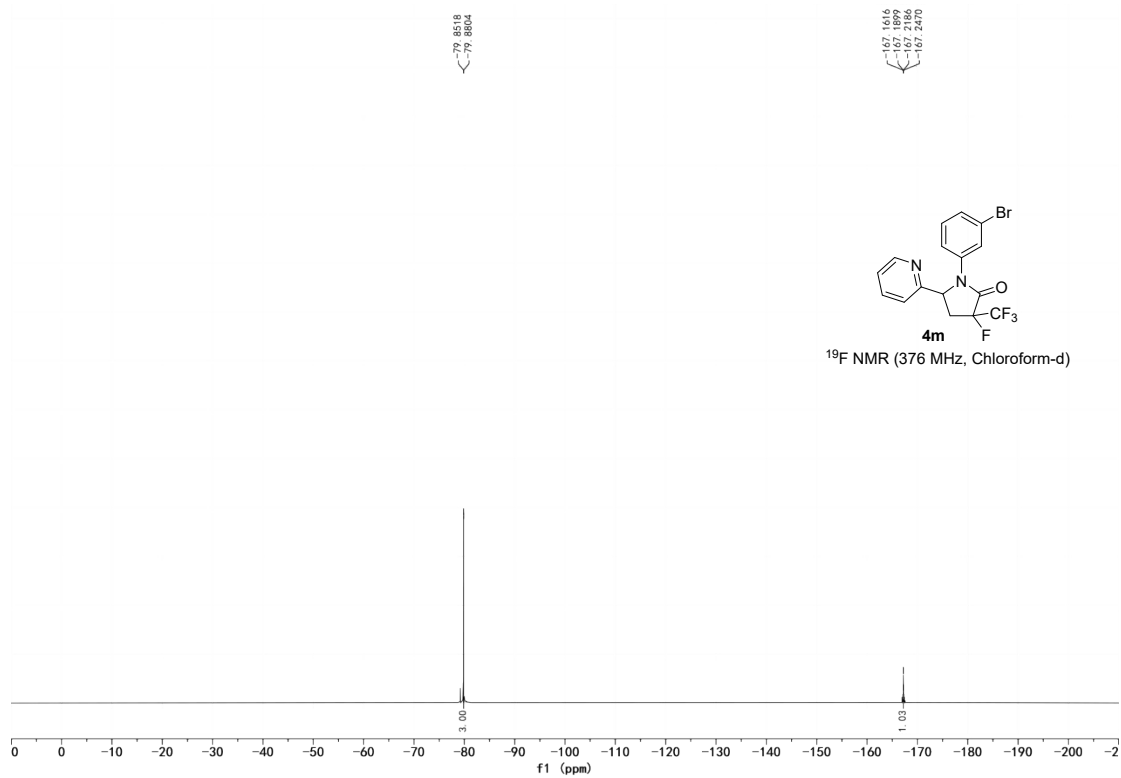



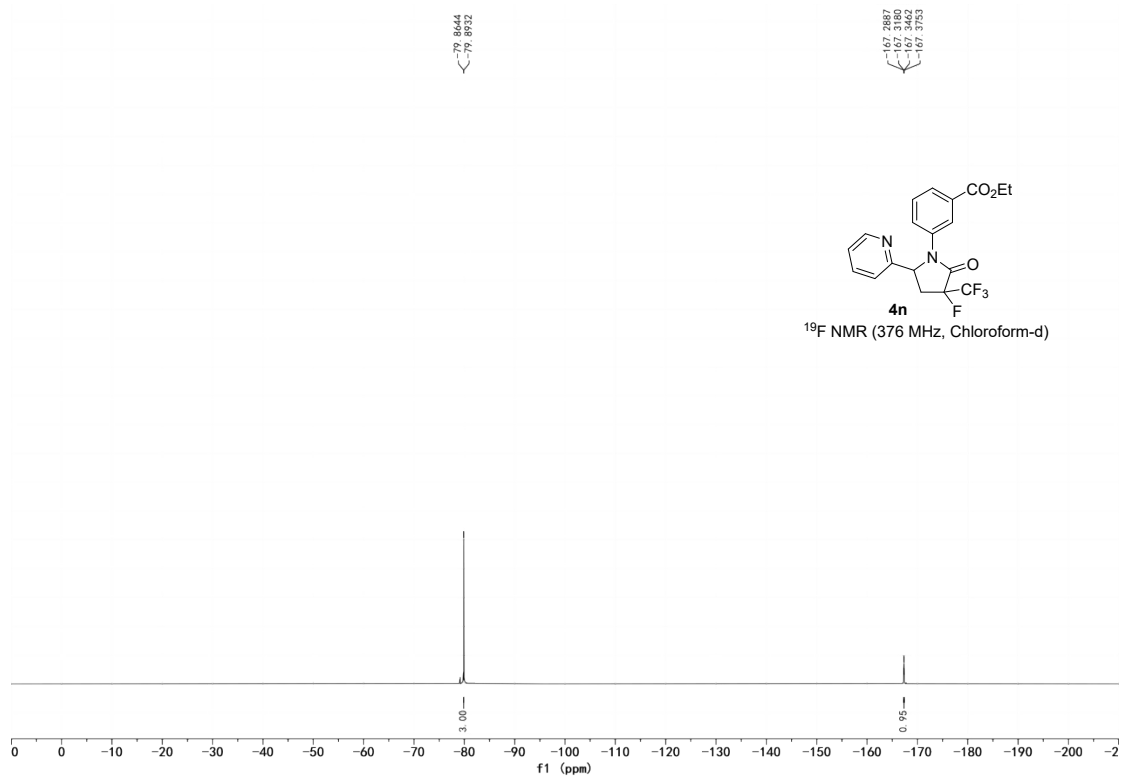





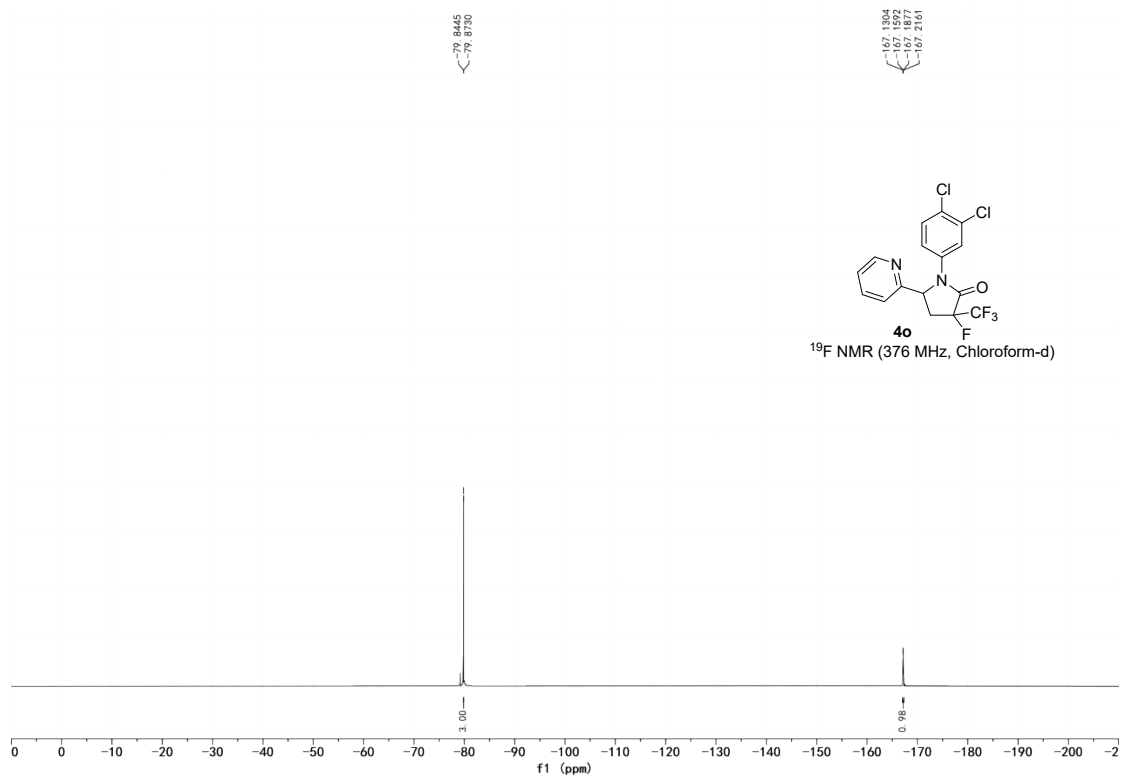

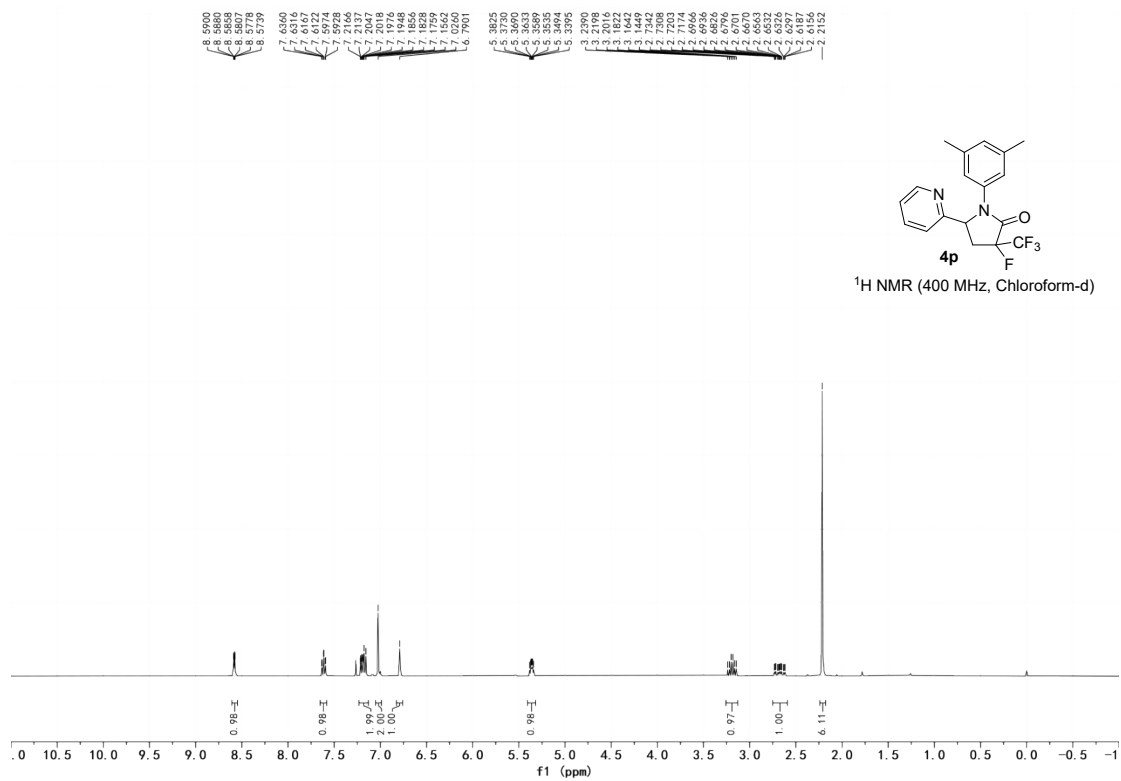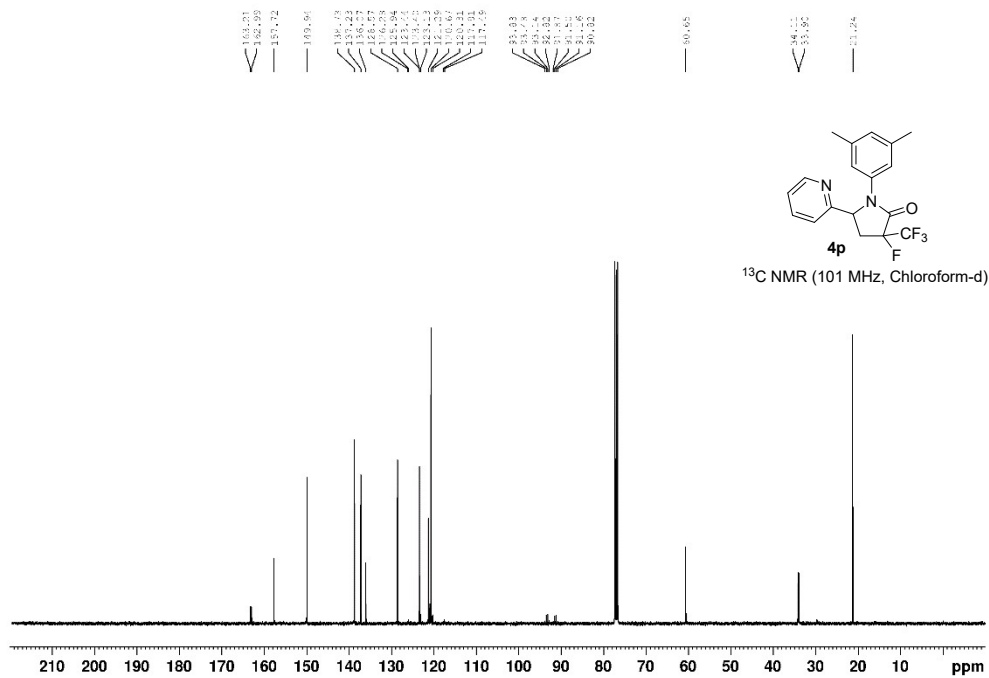

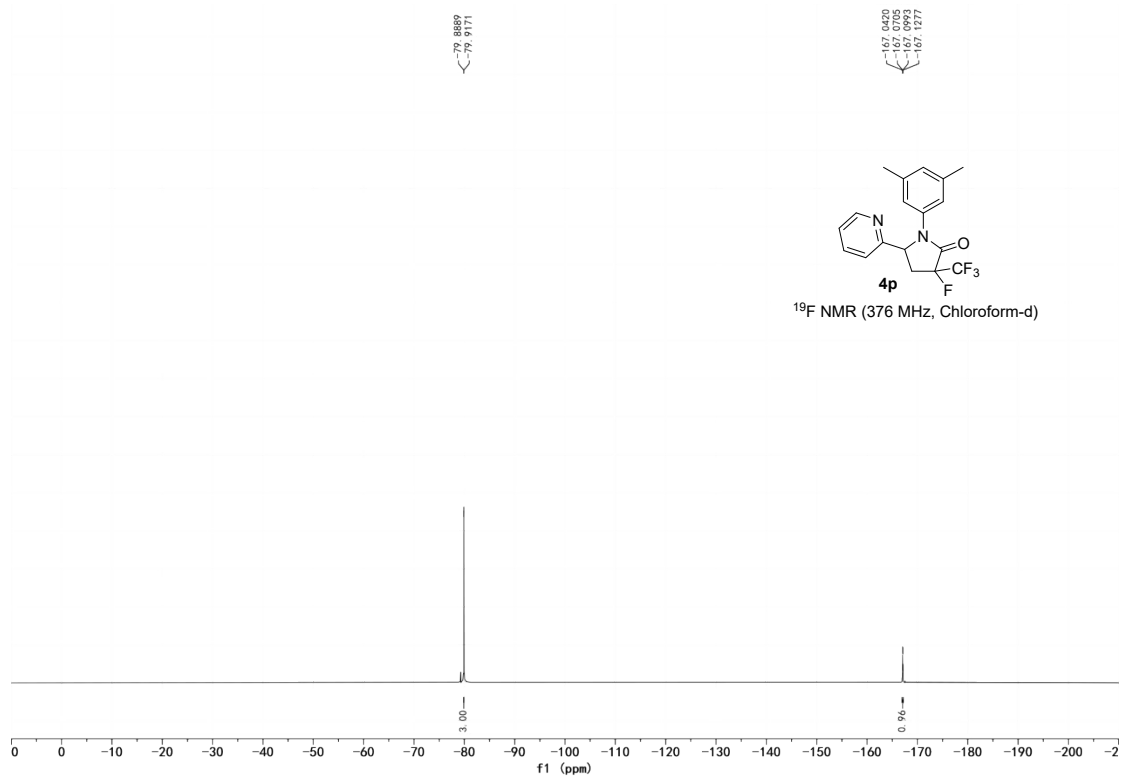



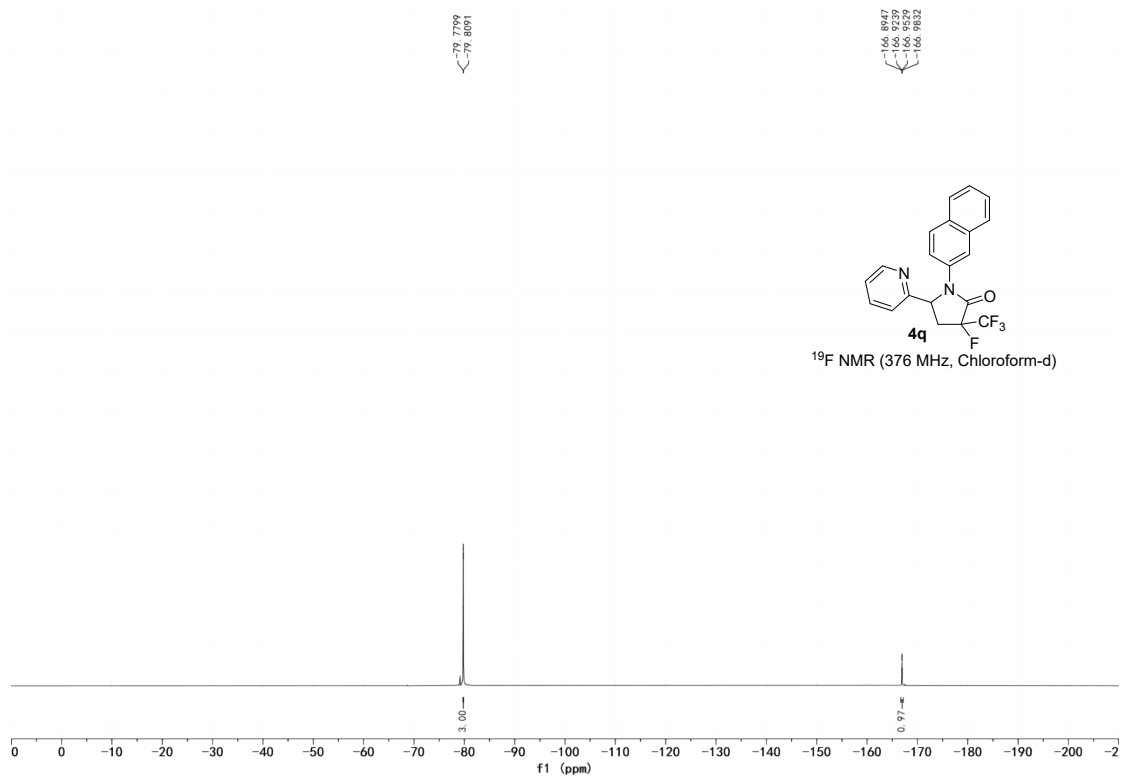

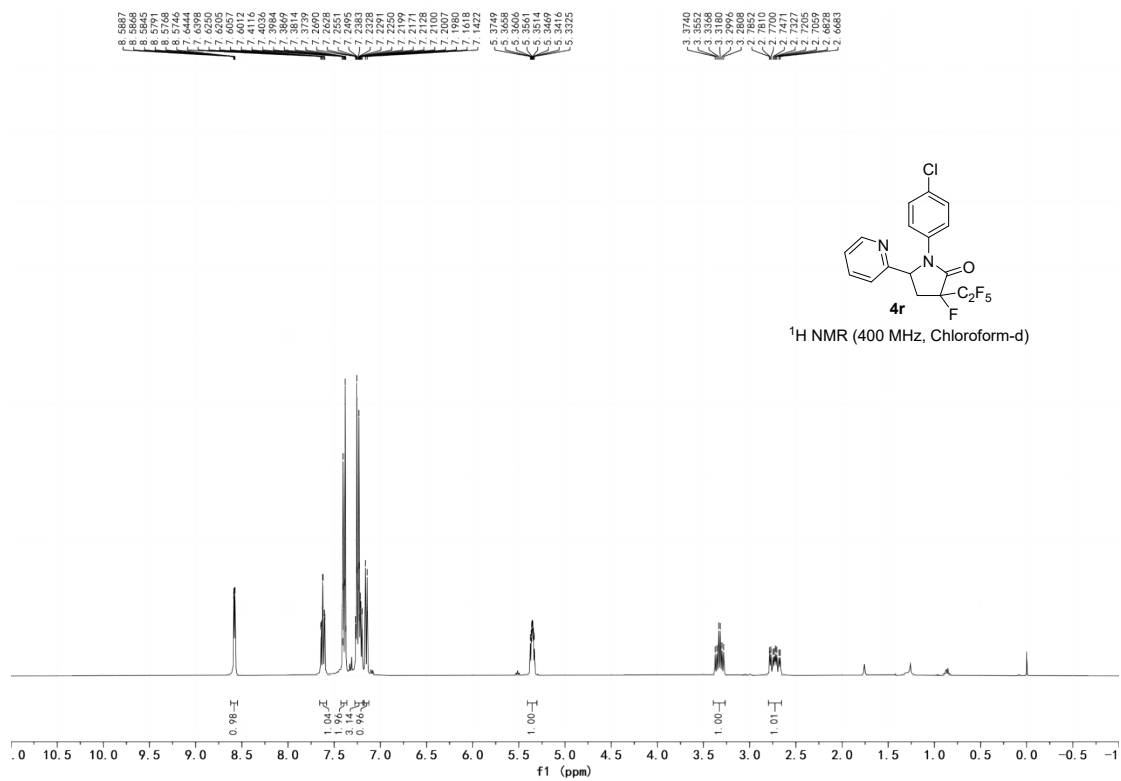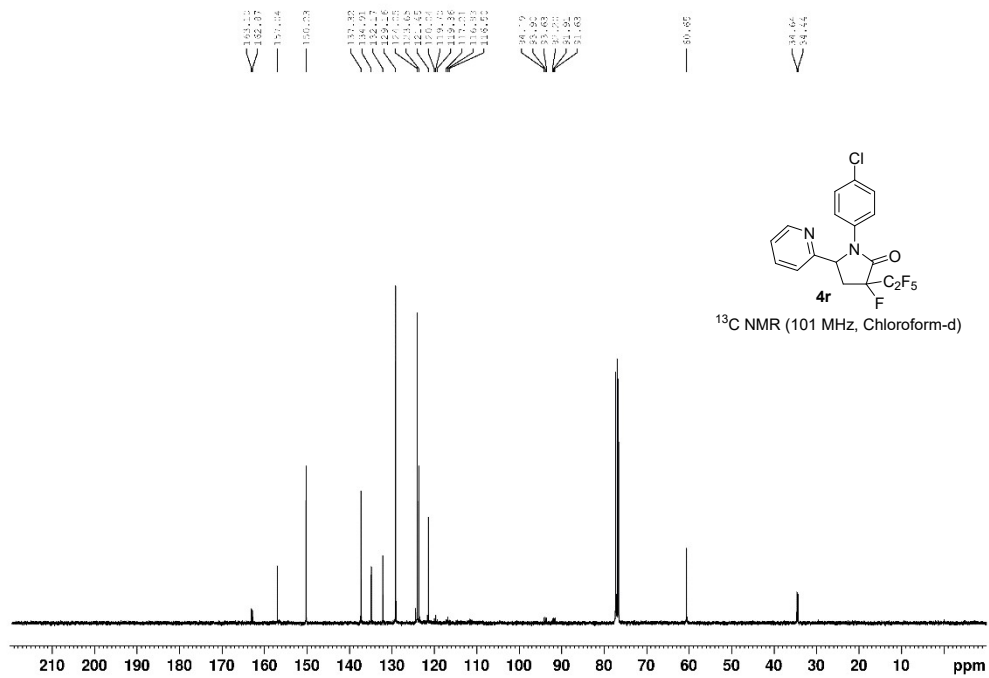

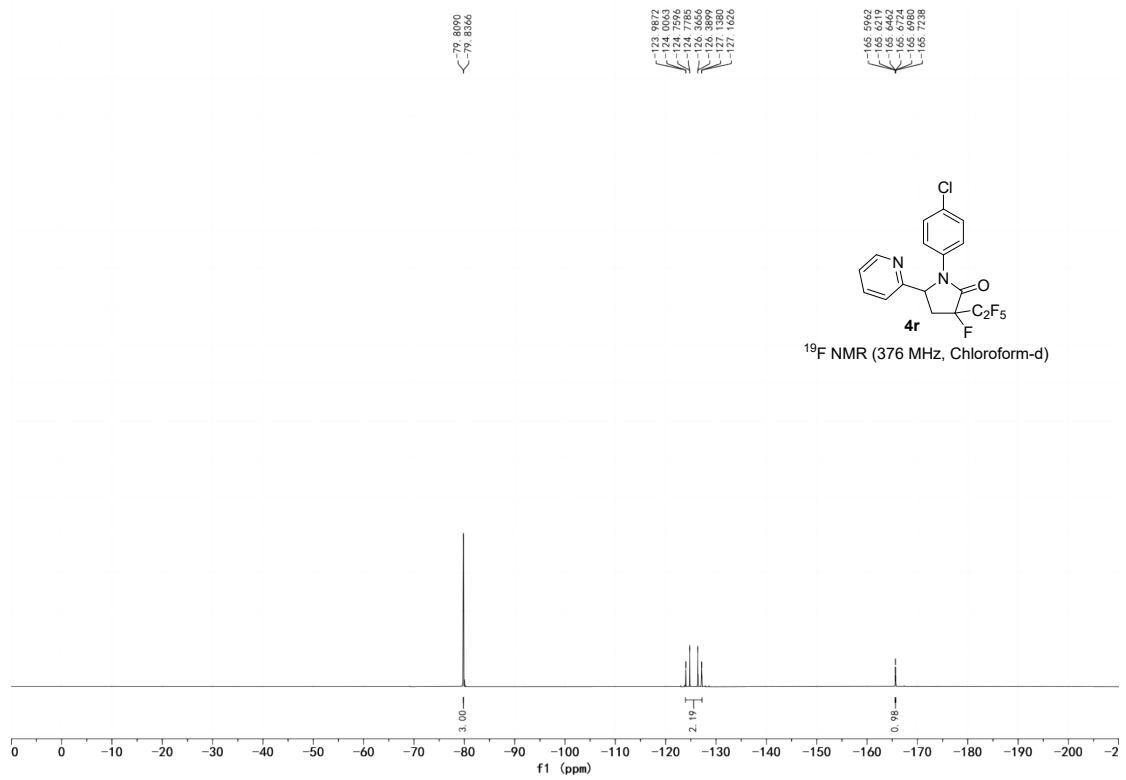







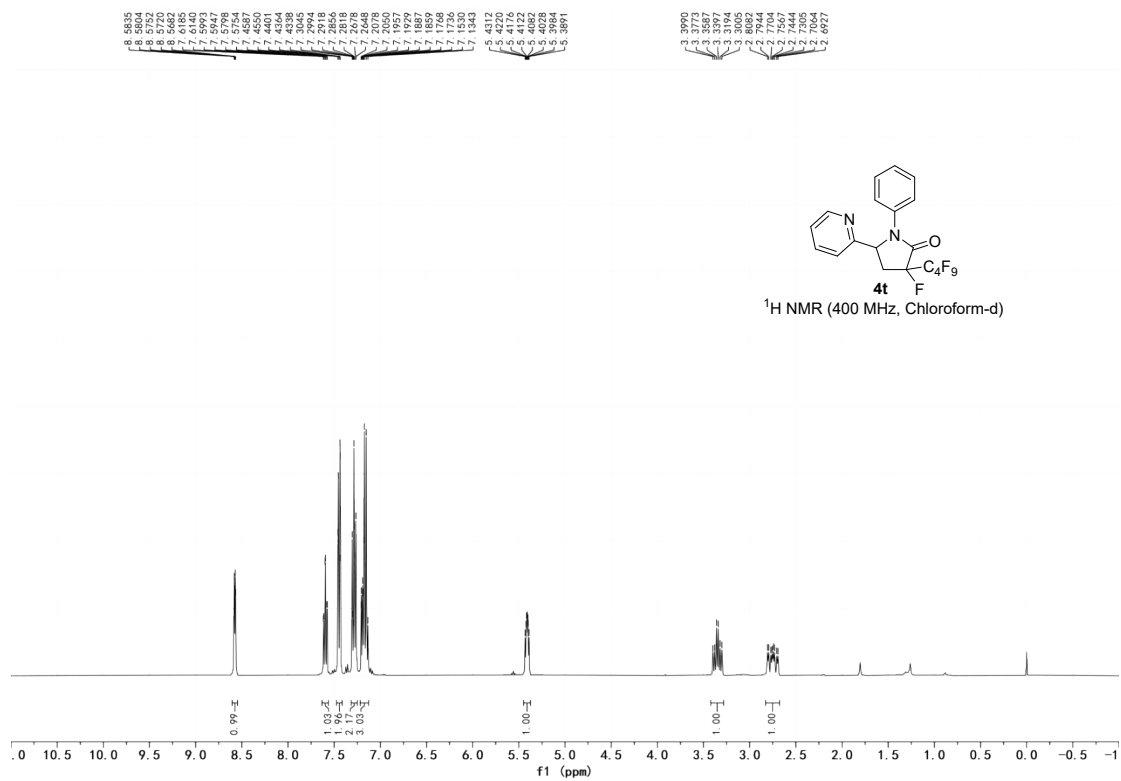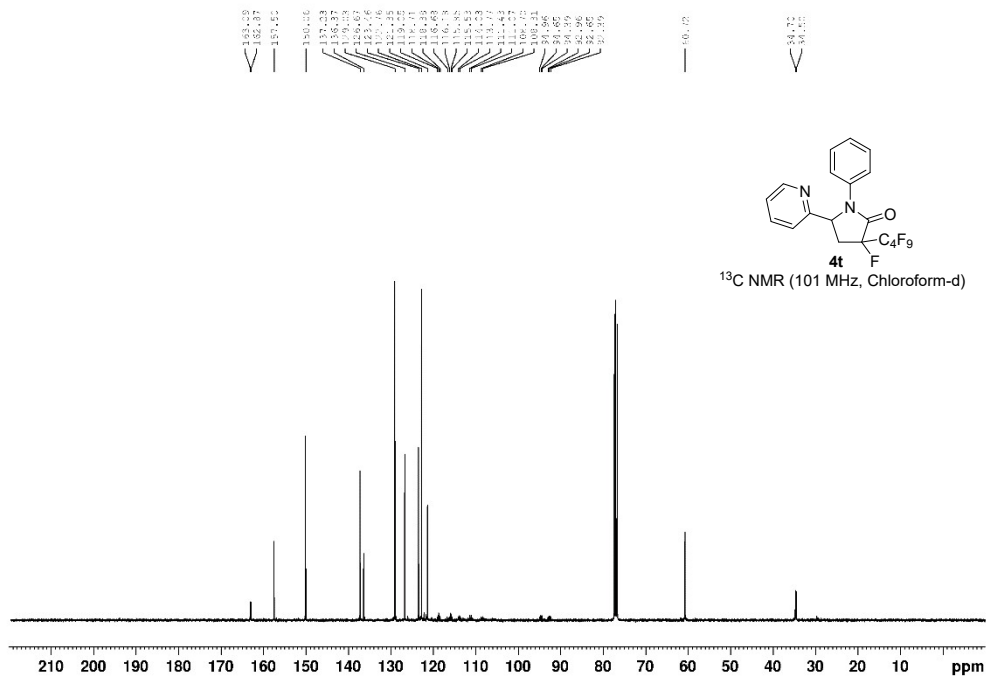



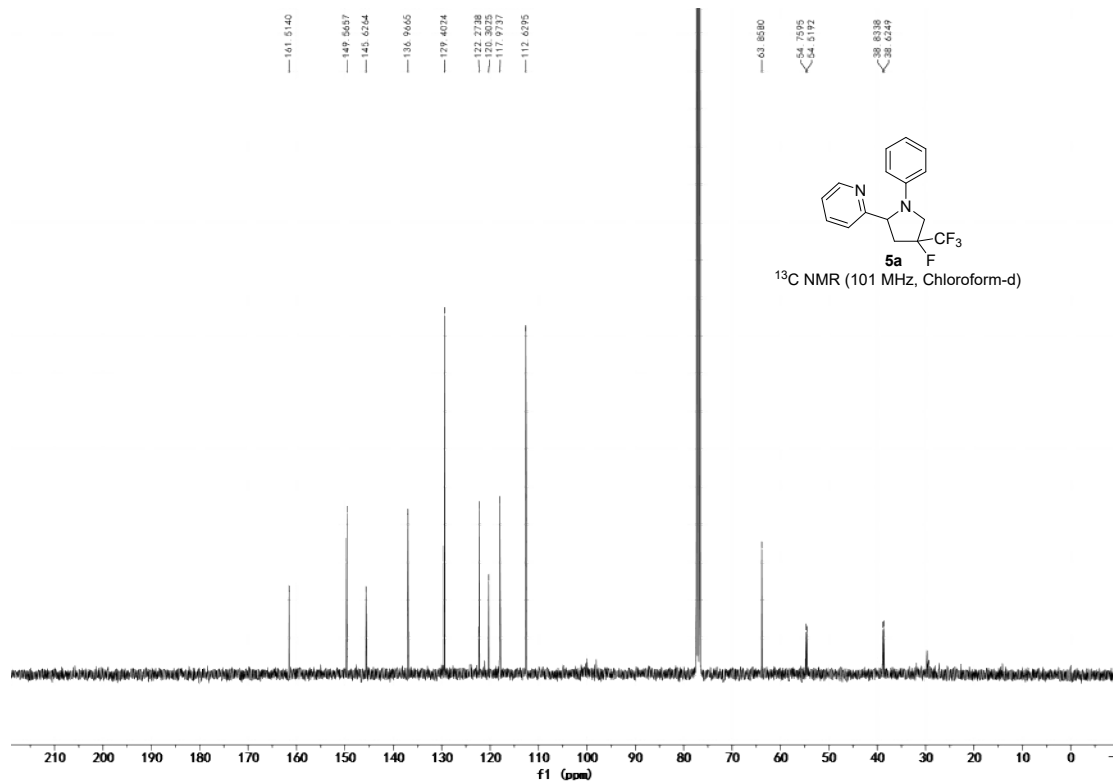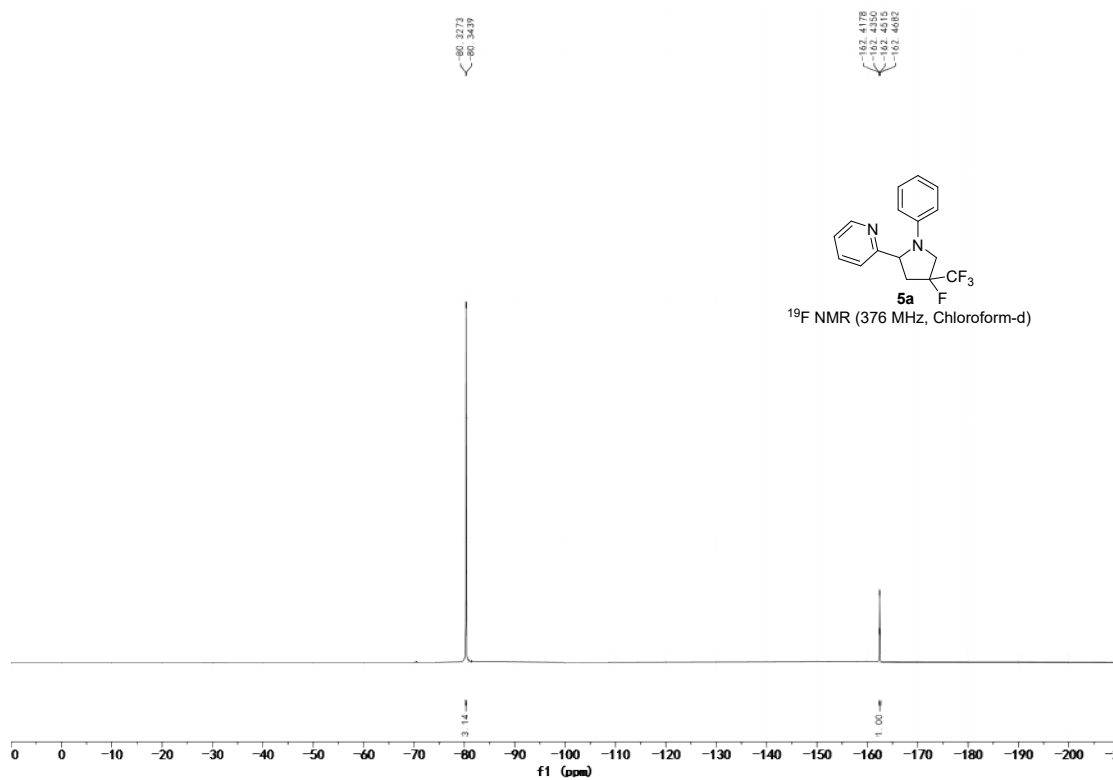

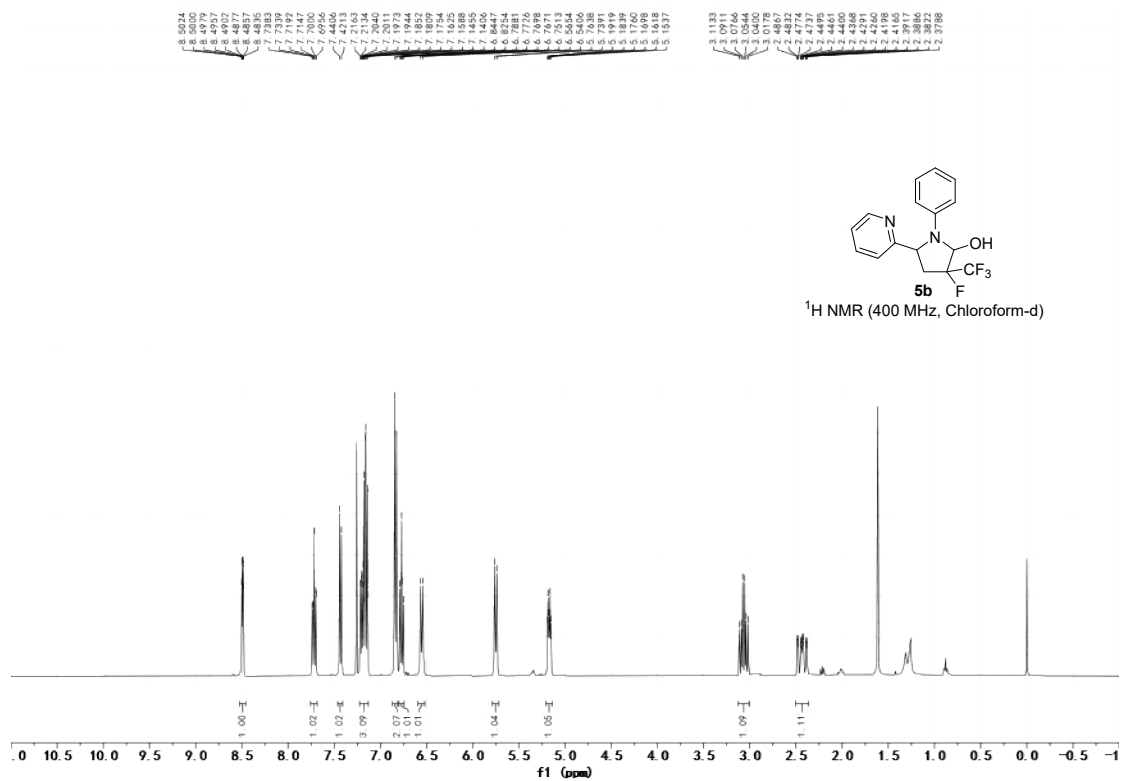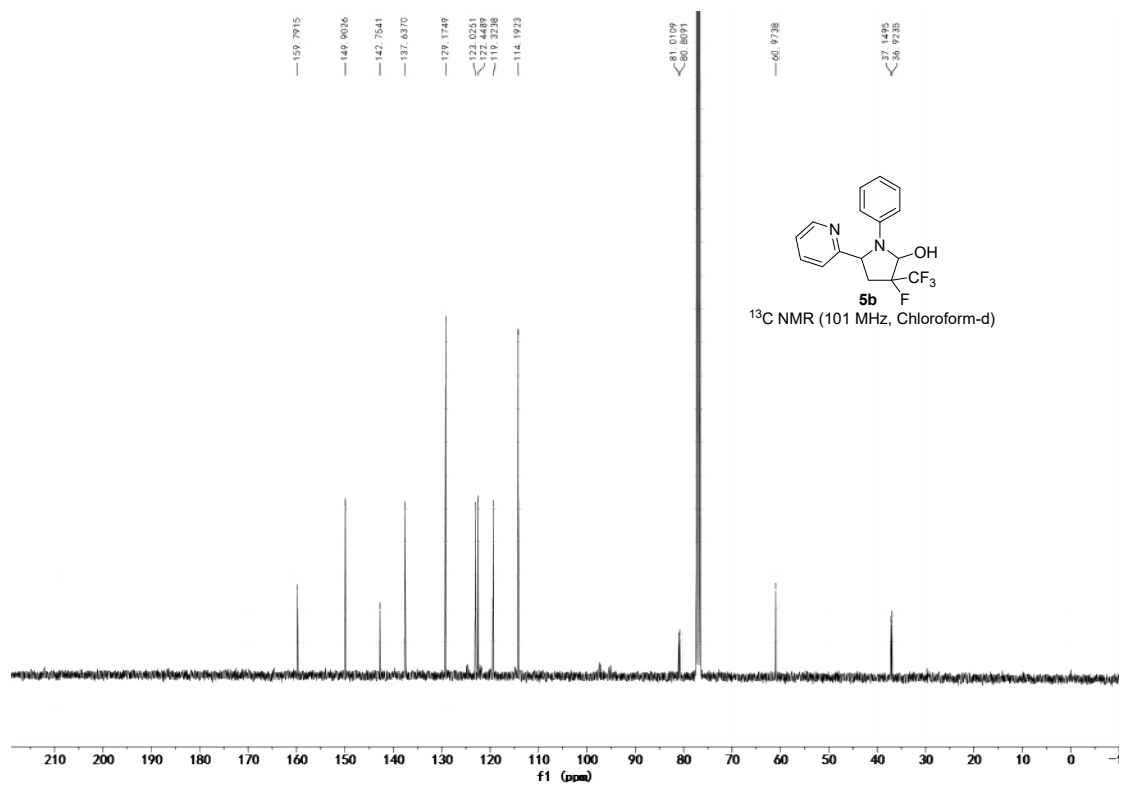

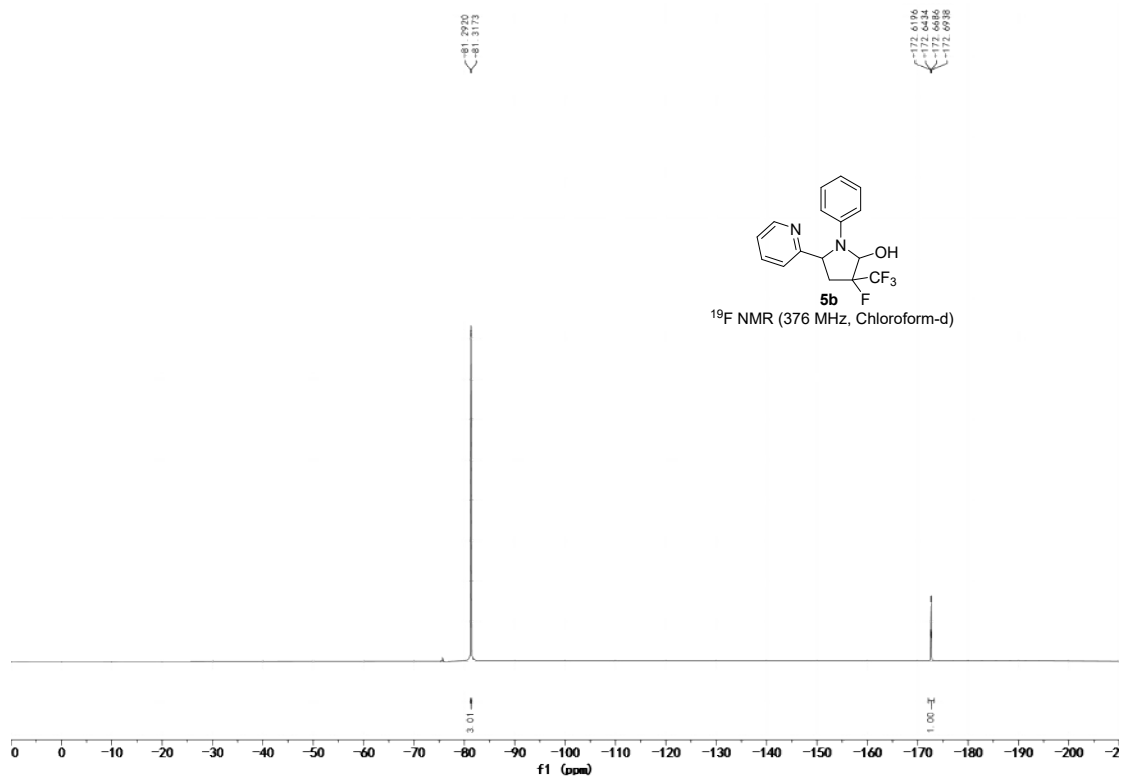

Supplement: d3sc03771a1.pdf [file d3sc03771a1.pdf]
